# Supplementary material for: Survival strategies of aerobic methanotrophs under hypoxia in methanogenic lake sediments
Source: Environ Microbiome. 2024 Jul 2;19:44. doi: 10.1186/s40793-024-00586-1 (PMC11218250; doi:10.1186/s40793-024-00586-1)
Supplement: Supplementary file 2 — Additional file 2. [file 40793_2024_586_MOESM2_ESM.xlsx]

## Sheet: Table S1
DNA sampling (days)	Treatment	Vial	Faction	16S rRNA	Metagenome
0		T0		+	-
		T0		+	-
7	13C	A	Labeled	+	-
		B		+	+
		C		+	-
		A	Unlabeled	+	-
		B		+	-
		C		+	-
	12C	A	Labeled	+	-
		B		+	-
		C		+	-
		A	Unlabeled	+	-
		B		+	-
		C		+	-
14	13C	A	Labeled	-	-
		B		+	-
		C		+	-
		A	Unlabeled	+	-
		B		+	-
		C		+	-
	12C	A	Labeled	-	-
		B		-	-
		C		-	-
		A	Unlabeled	-	-
		B		-	-
		C		-	-
21	13C	A	Labeled	+	-
		B		+	-
		C		+	-
		A	Unlabeled	+	-
		B		+	-
		C		+	-
	12C	A	Labeled	-	-
		B		-	-
		C		-	-
		A	Unlabeled	-	-
		B		-	-
		C		-	-

## Sheet: Table S2
Treatment	Vail	Oxygen sensor	Incubation time before sacrificed (days)	16S rRNA	Metagenome
	T0			+	-
1% O2 + CH4	1	+		-	-
	2	+		-	-
	3	-	21	+	-
	4	-	21	+	+
	5	-	24	+	-
	6	-	25	+	-
	7	-	25	+	-
	8	-	28	+	-
	9	-	37	+	-
	10	-	37	+	-
	11	-	40	+	+
1% O2 + N2	12	+		-	-
	13	-	40	+	-
	14	-	40	+	-

## Sheet: Table S3
Genome ID	Genome Name	NCBI Taxon ID	Kingdom	Phylum	Class	Order	Family	Genus	Species	Genome Status	Strain	Genome Quality	BioProject Accession	BioSample Accession	Sequencing Status	Size	GC Content	Contig L50	Contig N50	CheckM Contamination	CheckM Completeness	Isolation Source	Isolation Comments	Isolation Country	Geographic Group	Geographic Location	Comments
107637	Methylomonas sp. LW13	107637	Bacteria	Proteobacteria	Gammaproteobacteria	Methylococcales	Methylococcaceae	Methylomonas	Methylomonas sp. LW13	WGS	LW13	Good	PRJNA225845	SAMN02841227	WGS	5200804	51.8	7	255048	5.7	97.5	sediment		USA	North America	USA: Lake Washington, Washington	Genomes of fifty methylotrophs isolated from Lake Washington
1.07885e+06	Methylovulum miyakonense HT12	1078846	Bacteria	Proteobacteria	Gammaproteobacteria	Methylococcales	Methylococcaceae	Methylovulum	Methylovulum miyakonense	WGS	HT12	Good	PRJNA86077	SAMN02261317	WGS	4686343	50.7	2	1452762	4.8	97.8						This project is highly relevant to the DOE Missions of global carbon cycling and sequestration, biogeochemistry, and bioprospecting for novel genetic inventory. C1 cycling by bacteria is important in the environment for a number of reasons. Methanotrophs control methane emmisions into the atmosphere, one of the most potent greenhouse gases. In addition, many methanotrophs are potential agents in …
1.09555e+06	Methylobacter luteus IMV-B-3098	1095552	Bacteria	Proteobacteria	Gammaproteobacteria	Methylococcales	Methylococcaceae	Methylobacter	Methylobacter luteus	WGS	IMV-B-3098	Good	PRJNA82927	SAMN02441220	WGS	5027835	51.1	2	1400569	3.5	95.9						This project is highly relevant to the DOE Missions of global carbon cycling and sequestration, biogeochemistry, and bioprospecting for novel genetic inventory. C1 cycling by bacteria is important in the environment for a number of reasons. Methanotrophs control methane emmisions into the atmosphere, one of the most potent greenhouse gases. In addition, many methanotrophs are potential agents in …
1.11647e+06	Methylococcaceae bacterium KoM1	1116472	Bacteria	Proteobacteria	Gammaproteobacteria	Methylococcales	Methylococcaceae	Methyloglobulus	Methyloglobulus morosus	Replaced	KoM1	Good	PRJNA223505	SAMN02469828	WGS	4142466	47.3	37	34463	3.5	95.1	profundal sediment sludge from Lake Constance	isolate from the Lake Constance; presumably will rise the establishment of a new bacterial genus and species	Germany	Europe	Germany	New metanotrophic isolate from the Lake Constance; presumably will rise the establishment of a new bacterial genus and species. The genome sequencing opens the possibility to acquire and access its physiological and biochemical properties in its entity.Next to the ability of this strain to utilise C1 compounds as C-sources we were interested in its ability to utilize or not phosphonates as single…
1.13155e+06	Methylomonas sp. MK1	1131552	Bacteria	Proteobacteria	Gammaproteobacteria	Methylococcales	Methylococcaceae	Methylomonas	Methylomonas sp. MK1	WGS	MK1	Good	PRJNA183356	SAMN02441753	WGS	5233591	51.5	1	3535778	4.8	97.4			USA		Lake Washington	Genomes of fifty methylotrophs isolated from Lake Washington
1.16817e+06	Methylomonas sp. 11b	1168169	Bacteria	Proteobacteria	Gammaproteobacteria	Methylococcales	Methylococcaceae	Methylomonas	Methylomonas sp. 11b	WGS	11b	Good	PRJNA157071	SAMN02597267	WGS	5412620	51.4	1	4275135	5.3	96.7			USA	North America	USA: Lake Washington. WA	Comparative genomics
1.29426e+06	Methylomonas koyamae JCM 16701	1294261	Bacteria	Proteobacteria	Gammaproteobacteria	Methylococcales	Methylococcaceae	Methylomonas	Methylomonas koyamae	WGS	JCM 16701	Poor	PRJDB819	SAMD00000536	WGS	4954151	56.05	46	31116	32.7	97.7						For the promotion of various studies, we perform genome sequencing of the important 300 microbial organisms to human and the environment.
1.29538e+06	Methylogaea oryzae strain E10	1295382	Bacteria	Proteobacteria	Gammaproteobacteria	Methylococcales	Methylococcaceae	Methylogaea	Methylogaea oryzae	Complete	E10	Good	PRJDB8373	SAMD00172921	Complete	4018824	63.2463	1	4018824			rice paddy field	isolated from a rice paddy field in Uruguay	Uruguay	South America	Uruguay:Treinta y Tres	Whole-genome sequencing was conducted for a methane-oxidizing bacterium, Methylogaea oryzae JCM16910 (type strain of the species), isolated from a rice paddy field in Uruguay.
1.40845e+06	Methylobacter tundripaludum 21/22	1408450	Bacteria	Proteobacteria	Gammaproteobacteria	Methylococcales	Methylococcaceae	Methylobacter	Methylobacter tundripaludum	WGS	21/22	Good	PRJNA223144	SAMN02743378	WGS	4665210	49.5	1	4665210	5.5	96.5						Genomes of fifty methylotrophs isolated from Lake Washington
1.40845e+06	Methylobacter tundripaludum 31/32	1408451	Bacteria	Proteobacteria	Gammaproteobacteria	Methylococcales	Methylococcaceae	Methylobacter	Methylobacter tundripaludum	WGS	31/32	Good	PRJNA223142	SAMN02745464	WGS	5047546	49.2	1	5034627	5.4	97.4						Genomes of fifty methylotrophs isolated from Lake Washington
1.49505e+06	Methyloterricola oryzae strain 73a	1495050	Bacteria	Proteobacteria	Gammaproteobacteria	Methylococcales	Methylococcaceae	Methyloterricola	Methyloterricola oryzae	WGS	73a	Good	PRJNA245748	SAMN03351828	WGS	4902375	61.1007	6	240953								Revising methanotrophy: a comprehensive genomic probing of the unexpected genetic and metabolic diversity of aerobic methane-consuming bacteria. Isolates were chosen for unusual physiology, from understudied clades, or from dominant members of an ecosystem with a high impact on global methane emissions.
1.49506e+06	Methylobacter sp. BBA5.1	1495064	Bacteria	Proteobacteria	Gammaproteobacteria	Methylococcales	Methylococcaceae	Methylobacter	Methylobacter sp. BBA5.1	WGS	BBA5.1	Good	PRJNA245747	SAMN02745761	WGS	5071918	52.2	14	131538	3.7	96.6						Revising methanotrophy: a comprehensive genomic probing of the unexpected genetic and metabolic diversity of aerobic methane-consuming bacteria. Isolates were chosen for unusual physiology, from understudied clades, or from dominant members of an ecosystem with a high impact on global methane emissions.
1.5281e+06	Methylocaldum sp. 175 strain 175	1760988	Bacteria	Proteobacteria	Gammaproteobacteria	Methylococcales	Methylococcaceae	Methylomagnum	Methylocaldum sp. 175	WGS	175	Good	PRJEB18516	SAMN02949497	WGS	5480099	62.96	1	4628900	4.2	96.6						Methylocaldum sp. 175
1.53855e+06	Methylomonas denitrificans FJG1	1538553	Bacteria	Proteobacteria	Gammaproteobacteria	Methylococcales	Methylococcaceae	Methylomonas	Methylomonas denitrificans	Replaced	FJG1	Poor	PRJNA258394	SAMN02997349	WGS	5010794	51.64	28	54646	16.6	96.1						The goals of this project was to sequence the genome of an aerobic denitrifying methanotroph. More specifically, the objective was to determine the gene modules that allow/facilitate denitrification in aerobic methanotrophs. The relevance of this project is mostly environmental, as this organism consumes a greenhouse gas (methane) and under oxygen limiting conditions produces another greenhouse g…
1.61154e+06	Methylomonas sp. Kb3	1611544	Bacteria	Proteobacteria	Gammaproteobacteria	Methylococcales	Methylococcaceae	Methylomonas	Methylomonas sp. Kb3	WGS	Kb3	Good	PRJNA420422	SAMN08111978	WGS	5121143	51.81	7	261342	5.7	98	rice rhizosphere		India	Asia	India: Kalbhorwadi, Urawade	Methanotrophic bacteria from rice fields in India were isolated. This organism was isolated from an organically fertilized rice field
1.7272e+06	Methylomonas sp. DH-1	1727196	Bacteria	Proteobacteria	Gammaproteobacteria	Methylococcales	Methylococcaceae	Methylomonas	Methylomonas sp. DH-1	Complete	DH-1	Good	PRJNA312260	SAMN04496853	Complete	5127407	56.21	1	4849532	4.3	99	waste sludge of a brewery plant		South Korea	Asia	South Korea: Cheongju-si, Chungcheongbuk-do	Isolation and omics-based characterization of methanotrophic bacteria for the bioconversion of methane to value-added products
173365	Methylobacter tundripaludum Tobar13m-G39	173365	Bacteria	Proteobacteria	Gammaproteobacteria	Methylococcales	Methylococcaceae	Methylobacter	Methylobacter tundripaludum	WGS	Tobar13m-G39	Good	PRJNA639779	SAMN21020391	WGS	4046928	50.3842	14	111871			aquatic biome		Spain	Europe	Spain: Laguna del Tobar
173365	Methylobacter tundripaludum SO_2017_LW4 bin 69	173365	Bacteria	Proteobacteria	Gammaproteobacteria	Methylococcales	Methylococcaceae	Methylobacter	Methylobacter tundripaludum	WGS	SO_2017_LW4 bin 69	Good	PRJNA823399	SAMN27301931	WGS	4032912	50.5637	17	62782	2.9	95.8	leachate from a leachate well at an active municipal landfill in Southern Ontario		Canada	North America	Canada: Waterloo
173366	Methylobacter tundripaludum strain OWC-G53F	173365	Bacteria	Proteobacteria	Gammaproteobacteria	Methylococcales	Methylococcaceae	Methylobacter	Methylobacter tundripaludum	WGS	OWC-G53F	Good	PRJNA369868	SAMN06295956	WGS	4181010	50.4649	6	245543	2.9	98.5			USA	North America	USA: Ohio	Genome sequencing to study microbial metabolism in carbon rich deep shale environments
173366	Methylobacter tundripaludum strain OWC-DMM	173365	Bacteria	Proteobacteria	Gammaproteobacteria	Methylococcales	Methylococcaceae	Methylobacter	Methylobacter tundripaludum	WGS	OWC-DMM	Good	PRJNA369867	SAMN06296071	WGS	4607785	49.4736	5	384498	4.3	99			USA	North America	USA: Ohio	Genome sequencing to study microbial metabolism in carbon rich deep shale environments
1.76099e+06	Methylomagnum ishizawai strain RS11D-Pr	1760988	Bacteria	Proteobacteria	Gammaproteobacteria	Methylococcales	Methylococcaceae	Methylomagnum	Methylomagnum ishizawai	WGS	RS11D-Pr	Good	PRJDB8374	SAMD00172935	WGS	5199498	63.4444	1	4607412			rice rhizosphere	isolated from rice rhizosphere	Japan	Asia	Japan:Aichi, Anjo, Anjo Agricultural and Extension Centre	Whole-genome sequencing was conducted for a type I methane-oxidizing bacterium, Methylomagnum ishizawai RS11D-Pr (type strain of the species), isolated from rice rhizosphere.
1.79707e+06	Methylomonas sp. ZR1	1797072	Bacteria	Proteobacteria	Gammaproteobacteria	Methylococcales	Methylococcaceae	Methylomonas	Methylomonas sp. ZR1	WGS	ZR1	Good	PRJNA454056	SAMN08997583	WGS	5179858	51.8134	1	5120261			methane, and value added products lycopene were proved exist	isolated by our group was proved to growth fast from methane, and value added products lycopene were proved exist in the pigment of ZR1 from methane	China	Asia	China: Henan provinice	Methanotrophs could convert methane into compounds with long carbon chain at room temperature, and have great potential to be developed into cell factories for the bioconversion of C1 compounds. However, the specific metabolic details of the methanotrophs were still unclear, and the metabolic characters of methanotrophs were proved distinct among species. Methylomonas sp. ZR1 isolated by our grou…
1.85456e+06	Methylomonas sp. EbA	1854563	Bacteria	Proteobacteria	Gammaproteobacteria	Methylococcales	Methylococcaceae	Methylomonas	Methylomonas albis	WGS	EbA	Good	PRJEB32611	SAMEA6807423	WGS	5395433	51.0674	1	5360835			surface water	isolated from River Elbe, Germany have been isolated (EbA, EbB)	Germany	Europe	Germany: River Elbe	Two strains of methanotrophic bacteria isolated from River Elbe, Germany have been isolated (EbA, EbB). Our physiological characterization show that they represent novel species: Methylomonas albis EbA und Methylomonas fluvii EbB. Both genomes have been sequenced with PacBio and assembled with HGAP. We consider both genomes as complete and with a very small level of contamination. The whole-genom…
1.85456e+06	Methylomonas sp. EbB	1854564	Bacteria	Proteobacteria	Gammaproteobacteria	Methylococcales	Methylococcaceae	Methylomonas	Methylomonas fluvii	WGS	EbB	Good	PRJEB32611	SAMEA6807424	WGS	5589402	51.524	2	1747170			surface water	isolated from River Elbe, Germany have been isolated (EbA, EbB)	Germany	Europe	Germany: River Elbe	Two strains of methanotrophic bacteria isolated from River Elbe, Germany have been isolated (EbA, EbB). Our physiological characterization show that they represent novel species: Methylomonas albis EbA und Methylomonas fluvii EbB. Both genomes have been sequenced with PacBio and assembled with HGAP. We consider both genomes as complete and with a very small level of contamination. The whole-genom…
1.90585e+06	Methylomonas sp. LWB	1905845	Bacteria	Proteobacteria	Gammaproteobacteria	Methylococcales	Methylococcaceae	Methylomonas	Methylomonas sp. LWB	WGS	LWB	Good	PRJNA345156	SAMN05858748	WGS	5365379	55.92	8	194717	3.4	98			Romania	Europe	Romania: Movile Cave, Mangalia	Draft genome sequence of Candidatus Methylomonas sp LWB
1.94686e+06	Methylobacter sp. UBA2091	1946861	Bacteria	Proteobacteria	Gammaproteobacteria	Methylococcales	Methylococcaceae	Methylobacter	Methylobacter sp. UBA2091	WGS	UBA2091	Good	PRJNA348753	SAMN06454939	WGS	3970929	49.27	20	61891	3.6	92.1	sediment		USA	North America	USA: Lake Washington	Challenges in cultivating microorganisms have limited the phylogenetic diversity of currently available microbial genomes. This is being addressed by advances in sequencing throughput and computational techniques that allow for the cultivation-independent recovery of high-quality bacterial and archaeal genomes directly from metagenomic data. In this study, we recovered 7,903 uncultivated genomes …
1.94686e+06	Methylobacter sp. UBA6696	1946862	Bacteria	Proteobacteria	Gammaproteobacteria	Methylococcales	Methylococcaceae	Methylobacter	Methylobacter sp. UBA6696	WGS	UBA6696	Good	PRJNA348753	SAMN06455592	WGS	3962968	49.26	29	40847	5.5	93.1	sediment		USA	North America	USA: Lake Washington	Challenges in cultivating microorganisms have limited the phylogenetic diversity of currently available microbial genomes. This is being addressed by advances in sequencing throughput and computational techniques that allow for the cultivation-independent recovery of high-quality bacterial and archaeal genomes directly from metagenomic data. In this study, we recovered 7,903 uncultivated genomes …
1.94686e+06	Methylobacter sp. UBA6712	1946864	Bacteria	Proteobacteria	Gammaproteobacteria	Methylococcales	Methylococcaceae	Methylobacter	Methylobacter sp. UBA6712	WGS	UBA6712	Good	PRJNA348753	SAMN06451704	WGS	4213703	48.85	25	55484	5.7	97.5	sediment		USA	North America	USA: Lake Washington	Challenges in cultivating microorganisms have limited the phylogenetic diversity of currently available microbial genomes. This is being addressed by advances in sequencing throughput and computational techniques that allow for the cultivation-independent recovery of high-quality bacterial and archaeal genomes directly from metagenomic data. In this study, we recovered 7,903 uncultivated genomes …
2.05196e+06	Methylobacter sp. strain FW305_bin.9	2051955	Bacteria	Proteobacteria	Gammaproteobacteria	Methylococcales	Methylococcaceae	Methylobacter	Methylobacter sp.	WGS	FW305_bin.9	Good	PRJNA514088	SAMN10720202	WGS	4587931	47.4491	25	52249			groundwater		USA	North America	USA: Tennessee	This project is to obtain single genomes of microbial species from metagenome data using genome-resolved strategies (genome binning method)
2.05196e+06	Methylobacter sp. SO_2017_LW4 bin 67	2051955		Proteobacteria	Gammaproteobacteria	Methylococcales	Methylococcaceae	Methylobacter	Methylobacter sp.	WGS	SO_2017_LW4 bin 67	Good	PRJNA823399	SAMN27301930	WGS	4627384	48.9201	21	61013	4.1	99.2	leachate from a leachate well at an active municipal landfill in Southern Ontario		Canada	North America	Canada: Waterloo
2.05196e+06	Methylobacter sp. SO_2017_GW1 bin 29	2051955		Proteobacteria	Gammaproteobacteria	Methylococcales	Methylococcaceae	Methylobacter	Methylobacter sp.	WGS	SO_2017_GW1 bin 29	Good	PRJNA823399	SAMN27301845	WGS	4710876	49.7371	51	25540	9	99.8	water from a groundwater well adjacent to an active municipal landfill in Southern Ontario		Canada	North America	Canada: Waterloo
2.05196e+06	Methylobacter sp. B4-02	2051955		Proteobacteria	Gammaproteobacteria	Methylococcales	Methylococcaceae	Methylobacter	Methylobacter sp.	WGS	B4-02	Good	PRJNA833668	SAMN28014429	WGS	4693463	52.6041	20	78240	1.2	99.2	anaerobic methane-oxidizing enrichment culture from terrestrial mud volcano		Russia	Europe	Russia: Taman Peninsula
2.05196e+06	Methylobacter sp. LH_M5	2051955		Proteobacteria	Gammaproteobacteria	Methylococcales	Methylococcaceae	Methylobacter	Methylobacter sp.	WGS	LH_M5	Good	PRJNA699472	SAMN18640945	WGS	2829496	48.1718	16	57296	0.9	92.1	saline spring sediment		Canada	North America	Canada: Nunavut
2.05196e+06	Methylobacter sp. strain DP16D_bin.19	2051955	Bacteria	Proteobacteria	Gammaproteobacteria	Methylococcales	Methylococcaceae	Methylobacter	Methylobacter sp.	WGS	DP16D_bin.19	Good	PRJNA514088	SAMN10720101	WGS	4490529	48.0011	31	50311			groundwater		USA	North America	USA: Tennessee	This project is to obtain single genomes of microbial species from metagenome data using genome-resolved strategies (genome binning method)
243234	Methylococcus capsulatus str. Bath	243233	Bacteria	Proteobacteria	Gammaproteobacteria	Methylococcales	Methylococcaceae	Methylococcus	Methylococcus capsulatus	Complete	Bath	Good	PRJNA21	SAMN02603968	Complete	3304561	63.6	1	3304561	3.8	98.5						Methylococcus capsulatus str. Bath. This organism will provide information on the proteins involved in methane oxidation.
2.49775e+06	Methylobacter sp. KRF1	2497749	Bacteria	Proteobacteria	Gammaproteobacteria	Methylococcales	Methylococcaceae	Methylobacter	Candidatus Methylobacter oryzae	Replaced	KRF1	Good	PRJNA510716	SAMN10613771	WGS	5023946	49.2466	24	76977			rice field soil		India	Asia	India: Kerala	This study involved isolation and cultivation of methanotrophic bacteria from various niches and study of their draft genomes for studying their metabolic properties and environmental roles.
2.60898e+06	Methylomonas sp. GJ1	2608981	Bacteria	Proteobacteria	Gammaproteobacteria	Methylococcales	Methylococcaceae	Methylomonas	Methylomonas rhizoryzae	Complete	GJ1	Good	PRJNA564367	SAMN12710709	Complete	4554005	53.6689	1	4554005			rice rhizosphere		China	Asia	China	methane metabolismus Methylomonas rhizoryzae GJ1T
271065	Methylomicrobium alcaliphilum strain 20Z	271065	Bacteria	Proteobacteria	Gammaproteobacteria	Methylococcales	Methylococcaceae	Methylotuvimicrobium	Methylotuvimicrobium alcaliphilum	Complete	20Z	Good	PRJNA77119		Complete	4668296	48.75	1	4668296	1.9	100						-
2.78579e+06	Methylomonas sp. LL1	2785785	Bacteria	Proteobacteria	Gammaproteobacteria	Methylococcales	Methylococcaceae	Methylomonas	Methylomonas sp. LL1	Complete	LL1	Good	PRJNA674997	SAMN16686212	Complete	4923893	51.8025	1	4798577			riparian wetland soil		Netherlands	Europe	Netherlands: River Waal	These bacteria were isolated as described from the same riparian wetland where the composition as well as functioning of the methanotrophic community was described thoroughly
2.80205e+06	Methylomicrobium sp. RS1	2802053	Bacteria	Proteobacteria	Gammaproteobacteria	Methylococcales	Methylococcaceae	Methylomicrobium	Methylomicrobium sp. RS1	WGS	RS1	Good	PRJNA690655	SAMN17256259	WGS	4726425	54.9613	8	233876			rice rhizosphere		India	Asia	India: Lavasa, Maharashtra state	Methanotrophs from Indian rice fields for diversity, cultivation and genomes.
2.81265e+06	Methylomonas sp. EFPC1	2812647	Bacteria	Proteobacteria	Gammaproteobacteria	Methylococcales	Methylococcaceae	Methylomonas	Methylomonas sp. EFPC1	Complete	EFPC1	Good	PRJNA701963	SAMN17918466	Complete	4993755	51.8458	1	4923651			stream biofilm	isolated from mercury-contaminated East Fork Poplar Creek at Oak Ridge, Tennessee	USA	North America	USA: East Fork Poplar Creek, Oak Ridge Tennessee	Methane-oxidizing bacteria - methanotrophs - were isolated from mercury-contaminated East Fork Poplar Creek at Oak Ridge, Tennessee. The goal of this study was to understand the role of methanotrophs in mercury speciation in the environment.
39770.3	Methylobacter whittenburyi strain ACM 3310	39770	Bacteria	Proteobacteria	Gammaproteobacteria	Methylococcales	Methylococcaceae	Methylobacter	Methylobacter whittenburyi	WGS	ACM 3310	Good	PRJNA252872	SAMN02865414	WGS	5440158	52	2	1626479	5.8	96.6						Revising methanotrophy: a comprehensive genomic probing of the unexpected genetic and metabolic diversity of aerobic methane-consuming bacteria. Isolates were chosen for unusual physiology, from understudied clades, or from dominant members of an ecosystem with a high impact on global methane emissions.
39770.6	Methylobacter whittenburyi strain UCM-B-3033	39770	Bacteria	Proteobacteria	Gammaproteobacteria	Methylococcales	Methylococcaceae	Methylobacter	Methylobacter whittenburyi	Duplicate	UCM-B-3033	Good	PRJNA252872	SAMN02865414	WGS	5440158	51.98	2	1626479	6.2	96.6
39774.3	Methylomicrobium agile strain ATCC 35068	39774	Bacteria	Proteobacteria	Gammaproteobacteria	Methylococcales	Methylococcaceae	Methylomicrobium	Methylomicrobium agile	WGS	ATCC 35068	Good	PRJNA239499	SAMN02745538	WGS	4526071	56.2	1	4431305	7.5	96.6						Revising methanotrophy: a comprehensive genomic probing of the unexpected genetic and metabolic diversity of aerobic methane-consuming bacteria. Isolates were chosen for unusual physiology, from understudied clades, or from dominant members of an ecosystem with a high impact on global methane emissions.
418.2	Methylomonas sp. SO_2017_LW3 bin 4	418		Proteobacteria	Gammaproteobacteria	Methylococcales	Methylococcaceae	Methylomonas	Methylomonas sp.	WGS	SO_2017_LW3 bin 4	Good	PRJNA823399	SAMN27301917	WGS	5214074	49.8707	14	138811	1.3	99.5	leachate from a leachate well at an active municipal landfill in Southern Ontario		Canada	North America	Canada: Waterloo
418.6	Methylomonas sp. strain FW.007	418	Bacteria	Proteobacteria	Gammaproteobacteria	Methylococcales	Methylococcaceae	Methylomonas	Methylomonas sp.	WGS	FW.007	Good	PRJNA323575	SAMN07958376	WGS	4032484	48.3615	13	98609	2.9	97.5	drinking water system-finished water	derived drinking water system	USA	North America	USA: Illinois, Champaign	An integrated analysis of microbial community structure and functionalities in a groundwater-derived drinking water system.Metagenomic analysis provides genomic insights of opportunistic pathogens recovered from different stages of a drinking water system;derived from metagenome
421.17	Methylomonas methanica strain R-45363	421	Bacteria	Proteobacteria	Gammaproteobacteria	Methylococcales	Methylococcaceae	Methylomonas	Methylomonas methanica	WGS	R-45363	Good	PRJNA315271	SAMN04555162	WGS	5407230	51.29	22	79455	5.7	98	top layer of a denitrification tank of a waste water treatment plant	isolated from terrestrial ecosystems and their physiology related to nitrogen assimilation and dissimilation were previously reported	Belgium	Europe	Belgium: Ghent	The genome sequences of Methylomonas methanica (NCIMB 11130T, R-45363, R-45371), Methylomonas koyamae (R-45378, R-45383, R-49807), Methylomonas lenta (R-45370) and Methylosinus sp. (R-45379) were obtained. These aerobic methanotrophs were isolated from terrestrial ecosystems and their physiology related to nitrogen assimilation and dissimilation were previously reported.
421.18	Methylomonas methanica strain NCIMB 11130	421	Bacteria	Proteobacteria	Gammaproteobacteria	Methylococcales	Methylococcaceae	Methylomonas	Methylomonas methanica	WGS	NCIMB 11130	Good	PRJNA315270	SAMN04555161	WGS	5023270	51.67	15	101790	4.3	97.5	terrestrial ecosystems and their physiology related to nitrogen assimilation and dissimilation were previously reported	isolated from terrestrial ecosystems and their physiology related to nitrogen assimilation and dissimilation were previously reported				The genome sequences of Methylomonas methanica (NCIMB 11130T, R-45363, R-45371), Methylomonas koyamae (R-45378, R-45383, R-49807), Methylomonas lenta (R-45370) and Methylosinus sp. (R-45379) were obtained. These aerobic methanotrophs were isolated from terrestrial ecosystems and their physiology related to nitrogen assimilation and dissimilation were previously reported.
421.19	Methylomonas methanica strain R-45371	421	Bacteria	Proteobacteria	Gammaproteobacteria	Methylococcales	Methylococcaceae	Methylomonas	Methylomonas methanica	WGS	R-45371	Good	PRJNA315272	SAMN04555163	WGS	5482877	51.27	16	108002	5.2	97.5	top layer of a denitrification tank of a waste water treatment plant	isolated from terrestrial ecosystems and their physiology related to nitrogen assimilation and dissimilation were previously reported	Belgium	Europe	Belgium: Ghent	The genome sequences of Methylomonas methanica (NCIMB 11130T, R-45363, R-45371), Methylomonas koyamae (R-45378, R-45383, R-49807), Methylomonas lenta (R-45370) and Methylosinus sp. (R-45379) were obtained. These aerobic methanotrophs were isolated from terrestrial ecosystems and their physiology related to nitrogen assimilation and dissimilation were previously reported.
421.26	Methylomonas methanica strain S-1	421	Bacteria	Proteobacteria	Gammaproteobacteria	Methylococcales	Methylococcaceae	Methylomonas	Methylomonas methanica	WGS	S-1	Good	PRJNA501192	SAMN10361798	WGS	5015946	51.6391	9	197901								Genome sequencing to study methane cycling in arid and semi-arid ecosystems
674036	Methylobacter marinus A45	674036	Bacteria	Proteobacteria	Gammaproteobacteria	Methylococcales	Methylococcaceae	Methylobacter	Methylobacter marinus	WGS	A45	Good	PRJNA157067	SAMN02261244	WGS	4987892	52.7	3	840515	3.2	96.1						This project is highly relevant to the DOE Missions of global carbon cycling and sequestration and biogeochemistry. Methanotrophy is an essential component of the global carbon cycle and represents the largest biological sink for methane. The vast global expansion of agricultural and urban environments has led to an imbalance in the methane budget. N-saturation of soils caused by fertilizer use a…
675511	Methylomicrobium buryatense 5G	675511	Bacteria	Proteobacteria	Gammaproteobacteria	Methylococcales	Methylococcaceae	Methylotuvimicrobium	Methylotuvimicrobium buryatense	WGS	5G	Good	PRJNA89087	SAMN02261325	WGS	5064878	48.7	4	532417	2.4	99.5						This project is highly relevant to the DOE Missions of global carbon cycling and sequestration and biogeochemistry. Methanotrophy is an essential component of the global carbon cycle and represents the largest biological sink for methane. The vast global expansion of agricultural and urban environments has led to an imbalance in the methane budget. N-saturation of soils caused by fertilizer use a…
686341	Methylomicrobium album BG8	686340	Bacteria	Proteobacteria	Gammaproteobacteria	Methylococcales	Methylococcaceae	Methylomicrobium	Methylomicrobium album	Complete	BG8	Good	PRJNA51783	SAMN02256390	Complete	4493444	56.25	1	4446267	3.9	96.6	muddy water		United Kingdom	Europe	United Kingdom	Methylomicrobium album BG8. This strain will be used for comparative genome analysis.
697282	Methylobacter tundripaludum SV96	697282	Bacteria	Proteobacteria	Gammaproteobacteria	Methylococcales	Methylococcaceae	Methylobacter	Methylobacter tundripaludum	WGS	SV96	Good	PRJNA48297	SAMN00102804	WGS	4978193	49.49	6	204278	7.4	99	Arctic wetland soil		Norway	Europe	Norway	Methylobacter tundripaludum SV96.This strain will be used for comparative sequence analysis.
702114	Methylomonas koyamae strain R-45383	702114	Bacteria	Proteobacteria	Gammaproteobacteria	Methylococcales	Methylococcaceae	Methylomonas	Methylomonas koyamae	WGS	R-45383	Good	PRJNA315277	SAMN04555167	WGS	5414320	55.85	41	40885	4.8	96.6	wetland	isolated from terrestrial ecosystems and their physiology related to nitrogen assimilation and dissimilation were previously reported	Belgium	Europe	Belgium: Ghent	The genome sequences of Methylomonas methanica (NCIMB 11130T, R-45363, R-45371), Methylomonas koyamae (R-45378, R-45383, R-49807), Methylomonas lenta (R-45370) and Methylosinus sp. (R-45379) were obtained. These aerobic methanotrophs were isolated from terrestrial ecosystems and their physiology related to nitrogen assimilation and dissimilation were previously reported.
702114	Methylomonas koyamae strain R-49807	702114	Bacteria	Proteobacteria	Gammaproteobacteria	Methylococcales	Methylococcaceae	Methylomonas	Methylomonas koyamae	WGS	R-49807	Good	PRJNA315278	SAMN04555168	WGS	5179245	55.86	23	68346	4.3	99	facultative waste stabilization pond	isolated from terrestrial ecosystems and their physiology related to nitrogen assimilation and dissimilation were previously reported	South Africa	Africa	South Africa	The genome sequences of Methylomonas methanica (NCIMB 11130T, R-45363, R-45371), Methylomonas koyamae (R-45378, R-45383, R-49807), Methylomonas lenta (R-45370) and Methylosinus sp. (R-45379) were obtained. These aerobic methanotrophs were isolated from terrestrial ecosystems and their physiology related to nitrogen assimilation and dissimilation were previously reported.
702114	Methylomonas koyamae strain R-45378	702114	Bacteria	Proteobacteria	Gammaproteobacteria	Methylococcales	Methylococcaceae	Methylomonas	Methylomonas koyamae	WGS	R-45378	Good	PRJNA315276	SAMN04555166	WGS	5115236	56.06	20	72566	3.8	99	wetland	isolated from terrestrial ecosystems and their physiology related to nitrogen assimilation and dissimilation were previously reported	Belgium	Europe	Belgium: Ghent	The genome sequences of Methylomonas methanica (NCIMB 11130T, R-45363, R-45371), Methylomonas koyamae (R-45378, R-45383, R-49807), Methylomonas lenta (R-45370) and Methylosinus sp. (R-45379) were obtained. These aerobic methanotrophs were isolated from terrestrial ecosystems and their physiology related to nitrogen assimilation and dissimilation were previously reported.
702114	Methylomonas koyamae strain LM6	702114	Bacteria	Proteobacteria	Gammaproteobacteria	Methylococcales	Methylococcaceae	Methylomonas	Methylomonas koyamae	Complete	LM6	Good	PRJNA394621	SAMN07357002	Complete	5080660	56.23	1	4894002	3.4	98.8	muddy water		South Korea	Asia	South Korea: Boseong-gun	Genome sequencing of methane-consuming bacteria, Methylomonas sp. LM6
702114	Methylomonas koyamae strain Fw12E-Y strain SM2	702114	Bacteria	Proteobacteria	Gammaproteobacteria	Methylococcales	Methylococcaceae	Methylomonas	Methylomonas koyamae	WGS	SM2	Good	PRJNA430105	SAMN08366476	WGS	4537340	55.5657	11	148869			root		Japan	Asia	Japan: Okayama	Isolation and characterization of the lanthanum-dependent methylotrophy in the rice rhizosphere
702114	Methylomonas koyamae strain Fw12E-Y	702114	Bacteria	Proteobacteria	Gammaproteobacteria	Methylococcales	Methylococcaceae	Methylomonas	Methylomonas koyamae	WGS	Fw12E-Y	Good	PRJDB8300	SAMD00171893	WGS	5102400	56.1389	1	4860954			floodwater of a rice paddy field, was conducted	isolated from floodwater of a rice paddy field, was conducted	Japan	Asia	Japan:Aichi, Anjo, Aichi Agricultural Research Center	Whole-genome sequencing of Methylomonas koyamae Fw12E-Y (type strain of the species), a type I methane-oxidizing bacterium isolated from floodwater of a rice paddy field, was conducted.
857087	Methylomonas methanica MC09	857087	Bacteria	Proteobacteria	Gammaproteobacteria	Methylococcales	Methylococcaceae	Methylomonas	Methylomonas methanica	Complete	MC09	Good	PRJNA53917	SAMN00713628	Complete	5051681	51.31	1	5051681	3.4	97.4						This organism will be used for comparative analysis.
980561	Methylomonas lenta strain R-45370	980561	Bacteria	Proteobacteria	Gammaproteobacteria	Methylococcales	Methylococcaceae	Methylomonas	Methylomonas lenta	WGS	R-45370	Good	PRJNA315274	SAMN04555164	WGS	4703858	46.63	27	53468	4.8	97.5	top layer of a denitrification tank of a waste water treatment plant	isolated from terrestrial ecosystems and their physiology related to nitrogen assimilation and dissimilation were previously reported	Belgium	Europe	Belgium: Ghent	The genome sequences of Methylomonas methanica (NCIMB 11130T, R-45363, R-45371), Methylomonas koyamae (R-45378, R-45383, R-49807), Methylomonas lenta (R-45370) and Methylosinus sp. (R-45379) were obtained. These aerobic methanotrophs were isolated from terrestrial ecosystems and their physiology related to nitrogen assimilation and dissimilation were previously reported.

## Sheet: Table S4
	1168169.3	421.19	418.7	980563.5	418.5	421.17	417.5	702114.17	980561.3	418.6	MAG159	2608981.3	107637.3	2785785.3	1294261.13	1854563.3	418.8	1131552.3	421.18	2812647.3	702114.15	702114.23	1538553.4	MAG148	418.17	MAG041	1173101.3	418.20	418.9	1905845.3	702114.21	1727196.4	418.16	418.3	702114.14	857087.3	1797072.3	1854564.3	1611544.3	702114.13	418.4	421.26	418.21
1168169.3	1	0.899421	0.717861	0.699815	0.744205	0.896009	0.695989	0.772425	0.748068	0.753228	0.768136	0.746869	0.891385	0.774949	0.777097	0.854001	0.744299	0.947138	0.87251	0.893449	0.776566	0.77636	0.872304	0.757884	0.764476	0.756046	0.741749	0.760064	0.744075	0.767711	0.771191	0.773319	0.746534	0.743957	0.779189	0.756807	0.888524	0.888278	0.888763	0.770199	0.743794	0.872584	0.739872
421.19	0.897849	1	0.722066	0.687293	0.744472	0.951508	0.687779	0.771965	0.752094	0.758679	0.767296	0.745925	0.875826	0.778779	0.777178	0.853433	0.744449	0.897223	0.88142	0.873988	0.777555	0.776429	0.881504	0.765923	0.763874	0.758853	0.743907	0.76207	0.744362	0.769587	0.771155	0.772708	0.747511	0.744201	0.778823	0.75556	0.875414	0.875524	0.87279	0.770078	0.74394	0.881729	0.742265
418.7	0.72019	0.723849	1	0.688656	0.77587	0.723467	0.68083	0.723463	0.714938	0.716888	0.719421	0.719573	0.721844	0.721585	0.723318	0.721164	0.717142	0.719928	0.725639	0.720739	0.722873	0.723223	0.725339	0.715526	0.723098	0.718255	0.716763	0.719171	0.717197	0.718037	0.719111	0.72283	0.717137	0.717012	0.723405	0.721425	0.720306	0.722237	0.722098	0.719797	0.71745	0.725631	0.707913
980563.5	0.685568	0.686901	0.691454	1	0.687497	0.684251	0.686598	0.693039	0.687349	0.67438	0.686066	0.688495	0.687665	0.692893	0.690425	0.684758	0.686776	0.684643	0.688921	0.686892	0.692911	0.690952	0.688838	0.682401	0.691937	0.683743	0.6851	0.680074	0.6871	0.693047	0.694048	0.692626	0.688966	0.687848	0.692821	0.688453	0.688814	0.686441	0.686878	0.693006	0.687769	0.688949	0.660653
418.5	0.743809	0.745087	0.797561	0.687691	1	0.743584	0.688728	0.754091	0.730344	0.739584	0.741615	0.7446	0.74444	0.752641	0.754532	0.741203	0.99041	0.744055	0.747486	0.743839	0.753831	0.754296	0.747425	0.747677	0.753241	0.744854	0.730287	0.741753	0.990937	0.751408	0.753367	0.75391	0.990197	0.991187	0.75442	0.744143	0.744979	0.743678	0.744085	0.752062	0.991474	0.747429	0.720569
421.17	0.895018	0.953126	0.723912	0.689931	0.744262	1	0.690251	0.772173	0.75346	0.757453	0.76598	0.747714	0.87331	0.779624	0.777805	0.854039	0.74527	0.899115	0.88093	0.874534	0.776284	0.776704	0.881019	0.760571	0.765242	0.757305	0.743515	0.763503	0.744433	0.77111	0.771553	0.772824	0.748997	0.744566	0.778812	0.756875	0.876025	0.875555	0.872995	0.769503	0.744276	0.881034	0.740406
417.5	0.689589	0.691374	0.684543	0.682063	0.688849	0.691149	1	0.696711	0.691161	0.686695	0.691649	0.691696	0.691972	0.694559	0.695532	0.692084	0.687427	0.690864	0.693886	0.692401	0.69442	0.695279	0.693926	0.688729	0.692135	0.692797	0.694296	0.687301	0.687379	0.691572	0.693134	0.6958	0.685669	0.687154	0.696077	0.6918	0.692286	0.693337	0.69161	0.691707	0.68823	0.694034	0.684334
702114.17	0.773302	0.773163	0.721428	0.697712	0.754404	0.773853	0.702327	1	0.7417	0.747527	0.750235	0.757433	0.777615	0.766675	0.967713	0.771931	0.755412	0.773043	0.777473	0.777175	0.957023	0.968741	0.777468	0.754489	0.763333	0.752699	0.738761	0.753396	0.755221	0.776889	0.861344	0.972447	0.755468	0.755456	0.990332	0.757121	0.777944	0.775554	0.776553	0.777057	0.754394	0.777437	0.73041
980561.3	0.747458	0.752446	0.712573	0.693466	0.731862	0.753254	0.690275	0.740329	1	0.76225	0.760646	0.735764	0.745066	0.769191	0.739311	0.747787	0.731852	0.750189	0.747416	0.745998	0.739148	0.738901	0.74767	0.759511	0.767784	0.75863	0.738015	0.781733	0.731488	0.734566	0.739344	0.738538	0.73393	0.731631	0.740152	0.769783	0.749395	0.74829	0.748069	0.735352	0.73126	0.747997	0.740348
418.6	0.753531	0.757216	0.716533	0.677635	0.740978	0.757045	0.686486	0.744866	0.762018	1	0.837236	0.740457	0.754216	0.768358	0.745258	0.751834	0.743149	0.755933	0.755627	0.752274	0.745612	0.744167	0.755681	0.761657	0.774368	0.83498	0.739702	0.767711	0.741763	0.746247	0.745887	0.744202	0.741875	0.741477	0.745533	0.767806	0.753233	0.753632	0.753889	0.744828	0.740225	0.755772	0.740464
MAG159	0.769642	0.767436	0.719551	0.690608	0.741822	0.766139	0.691338	0.747877	0.761075	0.837293	1	0.746726	0.765113	0.77534	0.753926	0.754301	0.743455	0.762247	0.763386	0.757316	0.753485	0.753746	0.763301	0.769708	0.775517	0.828885	0.742773	0.777055	0.742946	0.74903	0.747858	0.747677	0.742606	0.742702	0.75664	0.768844	0.767614	0.766499	0.76037	0.751759	0.74235	0.763549	0.741628
2608981.3	0.749045	0.747361	0.717191	0.701219	0.744322	0.748232	0.698589	0.757579	0.737768	0.742249	0.74666	1	0.748272	0.754739	0.757104	0.744688	0.744774	0.748513	0.748028	0.749314	0.759478	0.756643	0.748205	0.748387	0.756436	0.748942	0.732541	0.746836	0.746447	0.754571	0.757892	0.75602	0.746411	0.746242	0.756542	0.750454	0.751828	0.747553	0.748601	0.75507	0.744529	0.748732	0.724427
107637.3	0.89221	0.876367	0.720922	0.686488	0.74531	0.874277	0.688331	0.776269	0.745477	0.754259	0.765388	0.746505	1	0.776384	0.783961	0.851522	0.745578	0.88859	0.864493	0.956141	0.781527	0.782849	0.864431	0.760703	0.7653	0.757656	0.741883	0.762609	0.745127	0.773476	0.772976	0.777698	0.746803	0.745297	0.783231	0.757947	0.952606	0.913863	0.977032	0.775673	0.744652	0.864695	0.740771
2785785.3	0.772608	0.776823	0.720891	0.704217	0.753362	0.77843	0.702218	0.764597	0.769066	0.768458	0.77317	0.752895	0.77346	1	0.767986	0.765261	0.753744	0.7749	0.77526	0.768315	0.768228	0.767359	0.775558	0.785733	0.788877	0.771335	0.745969	0.780758	0.753567	0.767261	0.761537	0.763971	0.755798	0.753595	0.768415	0.778571	0.771273	0.770846	0.77239	0.765627	0.753549	0.775565	0.738589
1294261.13	0.775998	0.776899	0.721608	0.695804	0.756753	0.777104	0.694427	0.968025	0.73959	0.744931	0.752401	0.755777	0.780033	0.766493	1	0.771306	0.756524	0.775772	0.779056	0.777127	0.955324	0.999191	0.779267	0.755297	0.762904	0.753079	0.738148	0.755086	0.756475	0.776358	0.861057	0.968978	0.756993	0.756499	0.968351	0.755117	0.779564	0.779664	0.778376	0.779106	0.756713	0.779214	0.731062
1854563.3	0.854897	0.855759	0.718234	0.701364	0.7427	0.855641	0.698708	0.771947	0.748609	0.751641	0.753392	0.744027	0.852242	0.765923	0.772111	1	0.743466	0.855017	0.864426	0.852958	0.772632	0.771831	0.86437	0.75232	0.758868	0.754939	0.742746	0.752227	0.742945	0.762901	0.769846	0.771751	0.742682	0.742923	0.77219	0.758654	0.852415	0.858635	0.852275	0.764498	0.742624	0.864766	0.740437
418.8	0.745837	0.746842	0.718667	0.68852	0.999963	0.74597	0.6856	0.757735	0.732694	0.742011	0.744146	0.74687	0.746907	0.754953	0.757358	0.743929	1	0.745937	0.74868	0.747318	0.757433	0.757481	0.74881	0.749499	0.755317	0.747686	0.733295	0.745364	0.999983	0.755194	0.757337	0.758312	0.999008	0.999992	0.757599	0.748038	0.747262	0.745334	0.747401	0.755635	0.999963	0.74868	0.721219
1131552.3	0.948063	0.900309	0.717807	0.700987	0.74446	0.900845	0.697327	0.771666	0.750518	0.755992	0.761606	0.74784	0.889151	0.777433	0.777371	0.853642	0.744447	1	0.873456	0.891953	0.777744	0.776587	0.873568	0.756391	0.763149	0.755286	0.743864	0.759712	0.743833	0.769193	0.771611	0.772645	0.745659	0.744096	0.777544	0.757226	0.889084	0.88915	0.889548	0.772621	0.743377	0.87373	0.739526
421.18	0.871719	0.881297	0.72605	0.689219	0.747619	0.879678	0.69099	0.775749	0.747692	0.756892	0.762396	0.746594	0.863096	0.774879	0.779513	0.862477	0.747336	0.871735	1	0.863646	0.778763	0.77842	0.999355	0.760691	0.766819	0.759759	0.74388	0.759729	0.747231	0.768559	0.775062	0.776137	0.749322	0.747339	0.779131	0.761634	0.863026	0.862574	0.862707	0.770139	0.747098	0.999711	0.740879
2812647.3	0.894169	0.874946	0.719105	0.6979	0.744656	0.875866	0.695989	0.777435	0.747597	0.753411	0.75689	0.747796	0.956788	0.768467	0.779132	0.85285	0.745695	0.893702	0.865405	1	0.777047	0.778692	0.86547	0.754589	0.761536	0.755538	0.743941	0.755303	0.744596	0.767058	0.773397	0.777026	0.746703	0.744726	0.77632	0.758755	0.95227	0.913726	0.957824	0.770251	0.744977	0.865731	0.73901
702114.15	0.775594	0.776569	0.721708	0.695061	0.755494	0.774716	0.694951	0.956363	0.738623	0.745557	0.752562	0.757298	0.779552	0.767259	0.954434	0.770513	0.75605	0.77631	0.778086	0.776752	1	0.954907	0.778367	0.757406	0.763714	0.754339	0.737989	0.755308	0.756864	0.777212	0.860117	0.95624	0.756636	0.756828	0.954813	0.756064	0.779339	0.777673	0.779089	0.777798	0.755709	0.778292	0.730867
702114.23	0.776396	0.776788	0.720585	0.699574	0.755271	0.777722	0.697949	0.967462	0.739145	0.744618	0.751348	0.756249	0.781263	0.767134	0.998803	0.770899	0.755928	0.776134	0.780524	0.778763	0.956325	1	0.780565	0.755438	0.762916	0.752298	0.738706	0.754744	0.75572	0.776466	0.861559	0.969335	0.756622	0.755589	0.968858	0.755192	0.781047	0.779449	0.779501	0.779754	0.755553	0.780011	0.729214
1538553.4	0.871299	0.881146	0.72647	0.687859	0.748531	0.880164	0.690695	0.776676	0.74839	0.757555	0.762891	0.747486	0.862995	0.77455	0.780077	0.86207	0.748809	0.872229	0.999631	0.863479	0.77961	0.779125	1	0.760374	0.767963	0.760195	0.743554	0.759852	0.748597	0.768813	0.775112	0.776544	0.750839	0.748569	0.779815	0.761141	0.862414	0.862941	0.862464	0.770861	0.748013	0.999506	0.741382
MAG148	0.755709	0.76197	0.715005	0.688686	0.748096	0.758406	0.691456	0.754272	0.760116	0.76124	0.767864	0.747711	0.75716	0.784882	0.756389	0.752215	0.748131	0.755139	0.759028	0.753625	0.757949	0.756057	0.759076	1	0.775307	0.765353	0.737654	0.770002	0.74914	0.751243	0.752738	0.75393	0.747988	0.748906	0.755685	0.768727	0.755807	0.756313	0.7553	0.752279	0.748141	0.759513	0.736974
418.17	0.764386	0.764964	0.721108	0.696067	0.753901	0.765402	0.692796	0.763591	0.769076	0.774788	0.775296	0.756399	0.764736	0.790569	0.764062	0.760294	0.7549	0.763638	0.767034	0.762482	0.765086	0.763736	0.767338	0.774686	1	0.777583	0.743643	0.842737	0.754823	0.762221	0.761601	0.762236	0.754165	0.754546	0.763743	0.845075	0.763374	0.764153	0.763896	0.761383	0.75404	0.767446	0.733977
MAG041	0.756749	0.758233	0.716793	0.685916	0.74434	0.758005	0.692732	0.751629	0.759549	0.835612	0.828707	0.747765	0.757428	0.771746	0.753361	0.753925	0.745103	0.755715	0.759054	0.756019	0.754051	0.752847	0.759081	0.764771	0.777407	1	0.741084	0.770207	0.745025	0.748729	0.752394	0.750867	0.744012	0.744912	0.752248	0.769885	0.756206	0.756036	0.756292	0.749899	0.744753	0.759377	0.738882
1173101.3	0.742796	0.744798	0.71538	0.697594	0.730753	0.745055	0.70045	0.739525	0.739797	0.739304	0.740902	0.732214	0.742882	0.74606	0.739782	0.742677	0.731643	0.743162	0.744489	0.743227	0.738419	0.739422	0.744761	0.736767	0.742457	0.742342	1	0.739603	0.730855	0.735417	0.740544	0.739288	0.730342	0.73103	0.739471	0.742766	0.743329	0.742142	0.744166	0.736346	0.730564	0.744723	0.733229
418.20	0.759395	0.761127	0.716976	0.685265	0.742535	0.762339	0.691194	0.752801	0.780976	0.767823	0.775429	0.747945	0.761891	0.781471	0.757543	0.753672	0.743878	0.759781	0.760665	0.754817	0.756514	0.756498	0.760704	0.770463	0.842848	0.770136	0.74064	1	0.742946	0.75169	0.750661	0.751121	0.746925	0.742665	0.757522	0.852294	0.760695	0.760985	0.758913	0.753316	0.742309	0.760967	0.73548
418.9	0.744024	0.745049	0.717285	0.688703	0.999961	0.74514	0.687648	0.755989	0.731841	0.740571	0.743396	0.748092	0.745673	0.753223	0.756607	0.742559	0.99967	0.744511	0.746998	0.744394	0.756956	0.756289	0.747	0.749142	0.754466	0.747106	0.730967	0.74401	1	0.753895	0.756027	0.755983	0.999036	0.999951	0.755957	0.746219	0.745127	0.744013	0.745624	0.755005	0.999957	0.746967	0.720825
1905845.3	0.768105	0.769577	0.717598	0.705296	0.753378	0.771269	0.709305	0.778122	0.739335	0.747361	0.747979	0.758306	0.77248	0.769553	0.779417	0.76397	0.753291	0.769456	0.770493	0.768367	0.780854	0.778588	0.770715	0.751678	0.760995	0.749418	0.739499	0.751188	0.753961	1	0.774832	0.778502	0.755751	0.753984	0.780813	0.756279	0.77087	0.770666	0.770816	0.972765	0.754049	0.770699	0.729068
702114.21	0.771987	0.772153	0.716896	0.693172	0.753627	0.772313	0.694127	0.861749	0.739054	0.7449	0.747728	0.755848	0.772379	0.761534	0.862328	0.768507	0.754522	0.772221	0.775474	0.771817	0.860947	0.861971	0.775512	0.753158	0.759947	0.751097	0.737888	0.748449	0.754228	0.772488	1	0.86332	0.752436	0.754492	0.863552	0.753547	0.772217	0.771768	0.771795	0.773124	0.753905	0.775504	0.72958
1727196.4	0.773879	0.775462	0.720847	0.701434	0.753512	0.77482	0.69985	0.97273	0.738902	0.745309	0.749041	0.756003	0.779291	0.763677	0.969231	0.77112	0.755041	0.773669	0.778367	0.777573	0.957124	0.969605	0.77827	0.753296	0.761944	0.750854	0.739013	0.751177	0.754298	0.776822	0.863039	1	0.754069	0.75439	0.973498	0.755273	0.779618	0.77522	0.778098	0.77791	0.753402	0.777556	0.730578
418.16	0.747011	0.749516	0.718174	0.696554	0.997155	0.749478	0.688302	0.756688	0.735016	0.741105	0.743559	0.746379	0.74848	0.757637	0.758149	0.742837	0.997261	0.747204	0.749566	0.748505	0.757864	0.75786	0.749614	0.74886	0.755572	0.746736	0.731536	0.748441	0.997338	0.755904	0.753994	0.7564	1	0.997526	0.756962	0.746546	0.747342	0.745187	0.749188	0.755776	0.997324	0.749658	0.720109
418.3	0.744151	0.745214	0.716156	0.68595	0.999967	0.744595	0.685299	0.756807	0.731952	0.740658	0.742774	0.747384	0.746192	0.753564	0.756767	0.742514	0.999666	0.744511	0.74817	0.745377	0.757229	0.7566	0.748238	0.750058	0.755466	0.746584	0.730932	0.743927	0.99998	0.754399	0.755997	0.756841	0.998975	1	0.757041	0.74641	0.745664	0.744224	0.746264	0.754929	0.999967	0.748295	0.720196
702114.14	0.777925	0.77768	0.720804	0.696265	0.754213	0.778169	0.697839	0.98897	0.739816	0.745622	0.754234	0.755079	0.781264	0.768436	0.965691	0.7704	0.754648	0.776944	0.779776	0.775414	0.954524	0.966397	0.779839	0.756376	0.76251	0.751924	0.737367	0.756458	0.754588	0.777435	0.86245	0.972397	0.754111	0.754393	1	0.754475	0.780705	0.779492	0.780275	0.77813	0.75348	0.779804	0.728929
857087.3	0.757036	0.757774	0.718888	0.698505	0.745635	0.758634	0.698675	0.757251	0.771623	0.767847	0.769262	0.750803	0.760006	0.778802	0.757344	0.76061	0.747034	0.759147	0.762722	0.759357	0.758171	0.756733	0.762949	0.767912	0.845539	0.771149	0.742565	0.852712	0.74629	0.753216	0.755736	0.756396	0.746184	0.746262	0.757375	1	0.761609	0.760058	0.757882	0.752775	0.745842	0.763609	0.735549
1797072.3	0.889535	0.877027	0.719066	0.69771	0.745561	0.878001	0.694562	0.77519	0.749562	0.753269	0.766806	0.750357	0.953275	0.773117	0.781461	0.852076	0.74525	0.889462	0.864154	0.951181	0.781054	0.780802	0.864182	0.758261	0.763648	0.756707	0.741725	0.761029	0.745144	0.770314	0.771883	0.77592	0.747636	0.745117	0.780811	0.759216	1	0.914712	0.954215	0.774794	0.744773	0.864327	0.740005
1854564.3	0.888806	0.876546	0.72192	0.691994	0.744358	0.877026	0.700323	0.775923	0.750509	0.75553	0.766139	0.746119	0.913686	0.773186	0.781008	0.857401	0.744502	0.888631	0.863782	0.913423	0.778404	0.780103	0.863752	0.758329	0.764873	0.756833	0.742076	0.761298	0.743934	0.770148	0.771718	0.776706	0.744716	0.74392	0.781276	0.758662	0.913892	1	0.913267	0.772543	0.743901	0.864003	0.739013
1611544.3	0.889602	0.874675	0.720237	0.689749	0.745075	0.874532	0.69103	0.775177	0.7488	0.754963	0.761796	0.747314	0.977302	0.774722	0.781495	0.85235	0.745653	0.89005	0.86456	0.9566	0.780901	0.780424	0.864462	0.758902	0.76259	0.756699	0.742704	0.760655	0.745704	0.770438	0.772502	0.77562	0.747957	0.745697	0.782422	0.756913	0.954404	0.914238	1	0.774516	0.745176	0.864729	0.739121
702114.13	0.767708	0.768003	0.716959	0.695625	0.752062	0.767861	0.695283	0.775367	0.735257	0.744885	0.74921	0.754041	0.771334	0.764752	0.778313	0.763831	0.75338	0.770618	0.770183	0.76802	0.778163	0.777991	0.770198	0.751868	0.759814	0.750048	0.734356	0.751539	0.75347	0.971875	0.772726	0.775462	0.754233	0.753477	0.77791	0.751858	0.771675	0.769885	0.770691	1	0.753151	0.770168	0.726172
418.4	0.743624	0.744911	0.717275	0.686717	1	0.744557	0.68788	0.756075	0.73074	0.740408	0.742743	0.746432	0.745018	0.753893	0.756328	0.742326	0.999629	0.744156	0.747443	0.745236	0.755974	0.756162	0.747398	0.749348	0.754565	0.74603	0.731	0.743199	0.999912	0.75367	0.755376	0.755588	0.998835	0.99994	0.756246	0.745525	0.745473	0.743867	0.745258	0.754173	1	0.747455	0.720932
421.26	0.871543	0.881563	0.725618	0.689076	0.746751	0.879883	0.689385	0.775828	0.747527	0.756707	0.761047	0.747133	0.862923	0.775495	0.77978	0.862992	0.746605	0.871827	0.999731	0.863712	0.778545	0.778499	0.999399	0.760377	0.767118	0.759122	0.743696	0.759128	0.746279	0.768453	0.775035	0.775852	0.748297	0.746279	0.779283	0.760887	0.862984	0.862725	0.862284	0.770694	0.746084	1	0.740584
418.21	0.744271	0.745191	0.715972	0.675032	0.724689	0.74549	0.694029	0.734926	0.744538	0.744105	0.74506	0.729701	0.743466	0.742283	0.735398	0.744891	0.725723	0.74422	0.743484	0.744276	0.735193	0.735041	0.743507	0.741998	0.738756	0.743509	0.736947	0.739494	0.724902	0.730851	0.734163	0.735177	0.725009	0.725298	0.735448	0.739986	0.74435	0.743456	0.743554	0.731047	0.72463	0.743451	1

## Sheet: Table S5
Gene Family Statistics
PGFam	Align.	Align.	Num	Mean	Prop	Used In	Product
	Score	Length	Seqs	Sqr Freq	Gaps	Analysis
PGF_06812369	20.84	996	67	0.66	0.151	TRUE	Leucyl-tRNA synthetase (EC 6.1.1.4)
PGF_00982259	20.36	600	67	0.831	0.01	TRUE	Aspartyl-tRNA synthetase (EC 6.1.1.12) @ Aspartyl-tRNA(Asn) synthetase (EC 6.1.1.23)
PGF_00026904	19.87	735	67	0.733	0.074	TRUE	Oligopeptidase A (EC 3.4.24.70)
PGF_00926109	19.19	586	67	0.793	0.001	TRUE	Arginyl-tRNA synthetase (EC 6.1.1.19)
PGF_00057483	18.77	418	67	0.918	0	TRUE	Transcription termination factor Rho
PGF_05949521	18.32	619	67	0.736	0.007	TRUE	Protein translocase subunit SecD
PGF_00037588	18.14	599	67	0.741	0.048	TRUE	Prolyl-tRNA synthetase (EC 6.1.1.15), bacterial type
PGF_07995022	17.83	483	67	0.811	0.044	TRUE	Aminotransferase HpnO, required for aminobacteriohopanetriol
PGF_00019038	17.64	446	67	0.835	0.015	TRUE	ATP-dependent hsl protease ATP-binding subunit HslU
PGF_01054379	17.53	462	67	0.816	0.019	TRUE	Adenylosuccinate lyase (EC 4.3.2.2) @ SAICAR lyase (EC 4.3.2.2)
PGF_05498463	17.16	394	67	0.865	0	TRUE	Glutamate-pyruvate aminotransferase AlaC (EC 2.6.1.2)
PGF_00843497	17.11	423	67	0.832	0.035	TRUE	Cell division protein FtsA
PGF_00052238	17.1	475	67	0.785	0.046	TRUE	Signal recognition particle protein Ffh
PGF_00064460	17.09	571	67	0.715	0.087	TRUE	Ubiquinone biosynthesis regulatory protein kinase UbiB
PGF_02277678	16.64	393	67	0.839	0.008	TRUE	Phosphoglycerate kinase (EC 2.7.2.3)
PGF_02278006	15.77	379	67	0.81	0.037	TRUE	Quinolinate synthetase (EC 2.5.1.72)
PGF_00033359	15.68	360	67	0.826	0.001	TRUE	Phospho-N-acetylmuramoyl-pentapeptide-transferase (EC 2.7.8.13)
PGF_00062045	15.54	341	67	0.842	0.016	TRUE	Tryptophanyl-tRNA synthetase (EC 6.1.1.2)
PGF_02797400	15.5	551	67	0.66	0.154	TRUE	Cysteinyl-tRNA synthetase (EC 6.1.1.16)
PGF_03751973	15.49	611	67	0.626	0.07	TRUE	Inner membrane protein translocase and chaperone YidC, long form
PGF_00064004	15.48	519	67	0.68	0.128	TRUE	UDP-N-acetylmuramate:L-alanyl-gamma-D-glutamyl-meso-diaminopimelate ligase (EC 6.3.2.-)
PGF_05049118	15.37	356	67	0.815	0.032	TRUE	Holliday junction ATP-dependent DNA helicase RuvB (EC 3.6.4.12)
PGF_02019462	15.34	341	67	0.831	0.006	TRUE	Phenylalanyl-tRNA synthetase alpha chain (EC 6.1.1.20)
PGF_00007028	15.25	443	67	0.725	0.051	TRUE	Ribosome LSU-associated GTP-binding protein HflX
PGF_09129813	15.2	375	67	0.785	0.006	TRUE	Glutamate 5-kinase (EC 2.7.2.11) / RNA-binding C-terminal domain PUA
PGF_00423732	14.99	322	67	0.835	0.023	TRUE	4-hydroxy-3-methylbut-2-enyl diphosphate reductase (EC 1.17.7.4)
PGF_00007057	14.84	477	67	0.68	0.062	TRUE	tRNA-5-carboxymethylaminomethyl-2-thiouridine(34) synthesis protein MnmE
PGF_02950579	14.79	270	67	0.9	0.004	TRUE	Septum site-determining protein MinD
PGF_02029783	14.78	362	67	0.777	0.041	TRUE	GTP-binding protein Obg
PGF_04139053	14.71	387	67	0.748	0.079	TRUE	Uroporphyrinogen III decarboxylase (EC 4.1.1.37)
PGF_00067739	14.5	392	67	0.732	0.071	TRUE	[4Fe-4S] cluster assembly scaffold protein Mrp (=ApbC)
PGF_00070354	14.5	382	67	0.742	0.058	TRUE	2-keto-3-deoxy-D-arabino-heptulosonate-7-phosphate synthase I alpha (EC 2.5.1.54)
PGF_00014284	14.48	501	67	0.647	0.073	TRUE	Inner membrane transport protein YajR
PGF_01400330	14.44	373	67	0.748	0.12	TRUE	Biotin synthase (EC 2.8.1.6)
PGF_00034839	14.28	554	67	0.607	0.109	TRUE	Polysaccharide biosynthesis protein
PGF_00063944	14.2	337	67	0.774	0.093	TRUE	UDP-3-O-[3-hydroxymyristoyl] N-acetylglucosamine deacetylase (EC 3.5.1.108)
PGF_00418484	14.15	332	67	0.777	0.089	TRUE	Coenzyme PQQ synthesis protein B
PGF_00425212	14.08	568	67	0.591	0.144	TRUE	Exported zinc metalloprotease YfgC precursor
PGF_00033954	13.93	400	67	0.696	0.129	TRUE	Phosphoribosylformylglycinamidine cyclo-ligase (EC 6.3.3.1)
PGF_00420903	13.9	346	67	0.747	0.058	TRUE	D-arabinose-5-phosphate isomerase (EC 5.3.1.13)
PGF_00007027	13.68	296	67	0.795	0.007	TRUE	GTP-binding protein Era
PGF_00450848	13.67	371	67	0.71	0.052	TRUE	Nitrogen regulation protein NtrB (EC 2.7.13.3)
PGF_00015259	13.55	289	67	0.797	0.012	TRUE	ATP synthase gamma chain (EC 3.6.3.14)
PGF_04793289	13.52	421	67	0.659	0.125	TRUE	Squalene synthase (EC 2.5.1.21)
PGF_01033770	13.51	364	67	0.708	0.066	TRUE	Dihydroorotate dehydrogenase (quinone) (EC 1.3.5.2)
PGF_00015517	13.49	468	67	0.624	0.069	TRUE	Iron-sulfur cluster assembly protein SufD
PGF_00401752	13.47	252	67	0.849	0.014	TRUE	2-methoxy-6-polyprenyl-1,4-benzoquinol methylase (EC 2.1.1.201)
PGF_02959749	13.37	415	67	0.656	0.074	TRUE	Ribonuclease D (EC 3.1.26.3)
PGF_04505269	13.26	262	67	0.819	0.058	TRUE	SSU ribosomal protein S2p (SAe)
PGF_10081007	13.13	337	67	0.715	0.032	TRUE	Aerotolerance protein BatA
PGF_07844318	13.08	761	67	0.474	0.418	TRUE	3-phosphoshikimate 1-carboxyvinyltransferase (EC 2.5.1.19)
PGF_10569727	13.04	352	67	0.695	0.105	TRUE	LSU rRNA pseudouridine(1911/1915/1917) synthase (EC 5.4.99.23)
PGF_01393943	12.96	256	67	0.81	0.057	TRUE	Pyrroloquinoline-quinone synthase (EC 1.3.3.11)
PGF_00777371	12.91	249	67	0.818	0.034	TRUE	Orotidine 5'-phosphate decarboxylase (EC 4.1.1.23)
PGF_08518355	12.84	262	67	0.793	0.039	TRUE	ATP synthase F0 sector subunit a (EC 3.6.3.14)
PGF_02923127	12.83	266	67	0.787	0.094	TRUE	Uridylate kinase (EC 2.7.4.22)
PGF_00420482	12.83	255	67	0.803	0.012	TRUE	Cytochrome c-type biogenesis protein CcmC, putative heme lyase for CcmE
PGF_06936561	12.79	324	67	0.711	0.093	TRUE	Translation elongation factor Ts
PGF_00048842	12.78	337	67	0.696	0.082	TRUE	Ribosomal protein L3 N(5)-glutamine methyltransferase (EC 2.1.1.298)
PGF_00049362	12.69	373	67	0.657	0.084	TRUE	S-adenosylmethionine:tRNA ribosyltransferase-isomerase (EC 2.4.99.17)
PGF_09432500	12.67	380	67	0.65	0.067	TRUE	Rossmann fold nucleotide-binding protein Smf possibly involved in DNA uptake
PGF_05406959	12.57	356	67	0.666	0.059	TRUE	beta-N-acetylglucosaminidase (EC 3.2.1.52)
PGF_00423382	12.54	420	67	0.612	0.174	TRUE	Dihydroorotase (EC 3.5.2.3)
PGF_00008611	12.52	350	67	0.669	0.051	TRUE	Glycerol-3-phosphate dehydrogenase [NAD(P)+] (EC 1.1.1.94)
PGF_00423927	12.45	324	67	0.692	0.106	TRUE	4-hydroxybenzoate polyprenyltransferase (EC 2.5.1.39)
PGF_03373042	12.36	289	67	0.727	0.042	TRUE	Putative NAD(P)-dependent oxidoreductase EC-YbbO
PGF_00017190	12.29	261	67	0.761	0.07	TRUE	Lipopolysaccharide ABC transporter, ATP-binding protein LptB
PGF_03287477	12.23	215	67	0.834	0.028	TRUE	ATP phosphoribosyltransferase (EC 2.4.2.17) => HisGs
PGF_08693885	12.21	263	67	0.753	0.077	TRUE	3-oxoacyl-[acyl-carrier protein] reductase (EC 1.1.1.100), FadG
PGF_00648054	12.01	246	67	0.766	0.084	TRUE	Tol-Pal system protein TolQ
PGF_00413306	11.89	388	67	0.604	0.247	TRUE	tRNA-(cytosine32)-2-thiocytidine synthetase TtcA
PGF_07541421	11.73	550	67	0.5	0.291	TRUE	8-amino-7-oxononanoate synthase (EC 2.3.1.47)
PGF_10490900	11.67	209	67	0.807	0.061	TRUE	Anthranilate synthase, amidotransferase component (EC 4.1.3.27) @ Para-aminobenzoate synthase, amidotransferase component (EC 2.6.1.85)
PGF_00019428	11.61	195	67	0.832	0.061	TRUE	ATP-dependent protease subunit HslV (EC 3.4.25.2)
PGF_09160328	11.37	254	67	0.713	0.087	TRUE	Phosphate regulon transcriptional regulatory protein PhoB (SphR)
PGF_00064506	11.34	310	67	0.644	0.178	TRUE	Uncharacterized efflux ABC transporter, permease protein YadH
PGF_00420792	11.15	307	67	0.636	0.086	TRUE	D-alanine aminotransferase (EC 2.6.1.21)
PGF_08244241	11.08	360	67	0.584	0.073	TRUE	Tetraacyldisaccharide 4'-kinase (EC 2.7.1.130)
PGF_00413208	11.05	258	67	0.688	0.065	TRUE	tRNA (guanine(37)-N(1))-methyltransferase (EC 2.1.1.228)
PGF_09201380	10.89	364	67	0.571	0.073	TRUE	DNA polymerase III delta subunit (EC 2.7.7.7)
PGF_00048840	10.8	371	67	0.56	0.205	TRUE	Ribosomal protein L11 methyltransferase
PGF_00008780	10.69	422	67	0.52	0.134	TRUE	Glycine oxidase ThiO (EC 1.4.3.19)
PGF_00425810	10.64	284	67	0.631	0.107	TRUE	Cell division protein ZapD
PGF_10381714	10.5	237	67	0.682	0.106	TRUE	Orotate phosphoribosyltransferase (EC 2.4.2.10)
PGF_04991657	10.48	584	67	0.434	0.346	TRUE	Oxygen-independent coproporphyrinogen-III oxidase-like protein YggW
PGF_02463284	10.46	200	67	0.74	0.01	TRUE	Recombination protein RecR
PGF_02792560	10.4	241	67	0.67	0.054	TRUE	tRNA threonylcarbamoyladenosine biosynthesis protein TsaB
PGF_00041788	10.4	152	67	0.843	0.012	TRUE	Putative iron-sulfur cluster assembly scaffold protein for SUF system, SufE2
PGF_01853493	10.37	360	67	0.547	0.228	TRUE	Dihydropteroate synthase (EC 2.5.1.15)
PGF_06819459	10.33	197	67	0.736	0.021	TRUE	DnaA initiator-associating protein DiaA
PGF_03189552	10.26	207	67	0.713	0.033	TRUE	Holliday junction ATP-dependent DNA helicase RuvA (EC 3.6.4.12)
PGF_06180597	10.25	146	67	0.848	0.036	TRUE	LSU ribosomal protein L13p (L13Ae)
PGF_00523822	10.15	325	67	0.563	0.139	TRUE	Pantoate--beta-alanine ligase (EC 6.3.2.1)
PGF_00416576	10.05	202	67	0.707	0.099	TRUE	3'-to-5' oligoribonuclease (orn)
PGF_03198057	10.05	295	67	0.585	0.101	TRUE	Inner membrane protein YpjD
PGF_00047006	9.99	316	67	0.562	0.114	TRUE	Radical SAM domain protein
PGF_00021037	9.96	245	67	0.637	0.16	TRUE	Methylthioribulose-1-phosphate dehydratase (EC 4.2.1.109)
PGF_04557396	9.83	292	67	0.575	0.03	TRUE	23S rRNA (adenine(2030)-N(6))-methyltransferase (EC 2.1.1.266)
PGF_04498026	9.82	274	67	0.593	0.169	TRUE	Pyridoxal phosphate-containing protein YggS
PGF_00033237	9.79	722	67	0.364	0.539	TRUE	Phosphate starvation-inducible protein PhoH, predicted ATPase
PGF_06530721	9.77	276	67	0.588	0.172	FALSE	tRNA (guanine(46)-N(7))-methyltransferase (EC 2.1.1.33)
PGF_00048829	9.76	359	67	0.515	0.276	FALSE	LSU rRNA pseudouridine(2605) synthase (EC 5.4.99.22)
PGF_08092662	9.67	195	67	0.693	0.079	FALSE	Intracellular septation protein IspA
PGF_00419702	9.34	183	67	0.69	0.099	FALSE	Crossover junction endodeoxyribonuclease RuvC (EC 3.1.22.4)
PGF_03837024	9.32	141	67	0.784	0.025	FALSE	Protein YhfA
PGF_04315180	9.3	160	67	0.735	0.024	FALSE	Protein-export protein SecB (maintains pre-export unfolded state)
PGF_04762552	9.29	190	67	0.674	0.149	FALSE	Phosphopantetheine adenylyltransferase (EC 2.7.7.3)
PGF_10470343	9.26	151	67	0.753	0.079	FALSE	Ferric uptake regulation protein FUR
PGF_04845029	9.23	117	67	0.853	0.025	FALSE	LSU ribosomal protein L19p
PGF_00063937	9.2	315	67	0.518	0.222	FALSE	UDP-2,3-diacylglucosamine diphosphatase (EC 3.6.1.54)
PGF_01430214	9.18	164	67	0.717	0.079	FALSE	Deoxyuridine 5'-triphosphate nucleotidohydrolase (EC 3.6.1.23)
PGF_02336953	9.14	156	67	0.732	0.007	FALSE	Protein of unknown function Smg
PGF_10369954	9.09	432	67	0.438	0.321	FALSE	Rod shape-determining protein MreC
PGF_00051120	8.89	300	67	0.513	0.181	FALSE	Septum site-determining protein MinC
PGF_00008838	8.84	237	67	0.574	0.116	FALSE	16S rRNA (guanine(527)-N(7))-methyltransferase (EC 2.1.1.170)
PGF_00013490	8.83	203	67	0.62	0.103	FALSE	Hypoxanthine-guanine phosphoribosyltransferase (EC 2.4.2.8)
PGF_00413203	8.82	162	67	0.693	0.036	FALSE	tRNA (cytidine(34)-2'-O)-methyltransferase (EC 2.1.1.207)
PGF_00049909	8.81	131	67	0.77	0.039	FALSE	SSU ribosomal protein S9p (S16e)
PGF_02690675	8.71	136	67	0.747	0.03	FALSE	RidA/YER057c/UK114 superfamily protein
PGF_10480676	8.55	107	67	0.826	0.002	FALSE	ATP-dependent Clp protease adaptor protein ClpS
PGF_08331244	8.48	134	67	0.732	0.105	FALSE	Diacylglycerol kinase (EC 2.7.1.107)
PGF_10444145	8.37	96	67	0.854	0.028	FALSE	ATP synthase F0 sector subunit c (EC 3.6.3.14)
PGF_00030246	8.27	421	67	0.403	0.316	FALSE	Penicillin-insensitive murein endopeptidase
PGF_01466629	8.24	221	67	0.554	0.13	FALSE	Type IV pilus biogenesis protein PilN
PGF_05520131	8.18	478	67	0.374	0.447	FALSE	Hydroxymethylpyrimidine phosphate kinase ThiD (EC 2.7.4.7)
PGF_00985834	8.16	147	67	0.673	0.153	FALSE	Aspartate 1-decarboxylase (EC 4.1.1.11)
PGF_00049901	8.13	169	67	0.625	0.15	FALSE	SSU ribosomal protein S6p
PGF_03793164	8.1	110	67	0.773	0.107	FALSE	Integration host factor alpha subunit
PGF_01420802	8.1	191	67	0.586	0.228	FALSE	Transcriptional regulator MraZ
PGF_00423914	7.8	252	67	0.492	0.258	FALSE	1,6-anhydro-N-acetylmuramyl-L-alanine amidase
PGF_04630848	7.76	206	67	0.541	0.285	FALSE	Cytochrome c-type biogenesis protein CcmE, heme chaperone
PGF_07596127	7.76	198	67	0.551	0.245	FALSE	tRNA-specific adenosine-34 deaminase (EC 3.5.4.33)
PGF_00417577	7.7	227	67	0.511	0.341	FALSE	3-dehydroquinate dehydratase II (EC 4.2.1.10)
PGF_00668579	7.66	102	67	0.759	0.02	FALSE	YciL protein
PGF_00020361	7.62	173	67	0.579	0.116	FALSE	Metal-dependent hydrolase YbeY, involved in rRNA and/or ribosome maturation and assembly
PGF_02454577	7.57	93	67	0.785	0.06	FALSE	SSU ribosomal protein S20p
PGF_00178044	7.44	87	67	0.797	0.045	FALSE	SSU ribosomal protein S16p
PGF_00060431	7.35	85	67	0.797	0.15	FALSE	Translation initiation factor 1
PGF_00046622	7.28	84	67	0.794	0.058	FALSE	RNA-binding protein Hfq
PGF_00049858	7.17	77	67	0.817	0.024	FALSE	SSU ribosomal protein S18p @ SSU ribosomal protein S18p, zinc-independent
PGF_01674551	7.16	164	67	0.559	0.223	FALSE	Glycine cleavage system H protein
PGF_05220786	6.87	100	67	0.687	0.146	FALSE	Cell division topological specificity factor MinE
PGF_06649360	6.85	473	67	0.315	0.481	FALSE	Segregation and condensation protein B
PGF_00024855	6.23	280	67	0.372	0.532	FALSE	NADPH-dependent 7-cyano-7-deazaguanine reductase (EC 1.7.1.13)
PGF_00048535	6.11	282	67	0.364	0.383	FALSE	Outer membrane beta-barrel assembly protein BamE
PGF_07550057	5.59	87	67	0.599	0.265	FALSE	FIG002473: Protein YcaR in KDO2-Lipid A biosynthesis cluster

## Sheet: Table S6
genome	Particulate methane monooxygenase A-subunit (EC 1.14.13.25) (PGF_00030041)	Particulate methane monooxygenase B-subunit (EC 1.14.13.25) (PGF_00030042)	Particulate methane monooxygenase C-subunit (EC 1.14.13.25) (PGF_00030043)	Methane monooxygenase component D (EC 1.14.13.25) (PGF_02324154)	Methane monooxygenase component A gamma chain (EC 1.14.13.25) (PGF_00020626)	Methane monooxygenase regulatory protein B (PGF_00020630)	Methane monooxygenase component C (EC 1.14.13.25) (PGF_00020628)	Methane monooxygenase component A beta chain (EC 1.14.13.25) (PGF_00020625)	Methane monooxygenase component A alpha chain (EC 1.14.13.25) (PGF_00020622)	Methanol dehydrogenase large subunit protein (EC 1.1.2.7)	Methanol dehydrogenase, small subunit (EC 1.1.2.7)	D-arabino-3-hexulose 6-phosphate formaldehyde-lyase (EC 4.1.2.43)	6-phospho-3-hexuloisomerase (EC 5.3.1.27)	Serine hydroxymethyltransferase (EC 2.1.2.1)	Serine--glyoxylate aminotransferase (EC 2.6.1.45)	Malyl-CoA lyase (EC 4.1.3.24)	malate thiokinase large subunit	malate thiokinase small subunit	Malate dehydrogenase (EC 1.1.1.37)	Glyoxylate reductase (EC 1.1.1.26) @ Hydroxypyruvate reductase (EC 1.1.1.81)	6-phosphogluconate dehydrogenase, decarboxylating (EC 1.1.1.44)	4-hydroxy-2-oxoglutarate aldolase (EC 4.1.3.16) @ 2-dehydro-3-deoxyphosphogluconate aldolase (EC 4.1.2.14)	6-phosphofructokinase (EC 2.7.1.11)	Pyrophosphate-dependent fructose 6-phosphate-1-kinase (EC 2.7.1.90)	Triosephosphate isomerase (EC 5.3.1.1)	NAD-dependent glyceraldehyde-3-phosphate dehydrogenase (EC 1.2.1.12)	Phosphoglycerate kinase (EC 2.7.2.3)	Enolase (EC 4.2.1.11)
	pmoA	pmoB	pmoC	smmo						xoxF or mxaF	mxaI	hps	phi	smht	agt/sgaA	mclA	mtkA	mtkB	mdh		edd	eda	pfk	pfk	tpi	gapdh	pgk	eno
Methylobacter LK_1	2	2	2	0	0	0	0	0	0	1	0	1	1	1	1	1	0	0	1	0	1	1	1	1	1	1	1	1
Methylogaea LK_2	2	2	2	0	0	0	0	0	0	0	1	1	1	1	1	1	0	0	1	1	1	0	0	1	1	1	1	1
Methylomonas LK_3	2	2	2	0	0	0	0	0	0	2	1	2	1	1	1	1	0	0	1	0	1	1	0	1	1	1	1	1
Methylomonas LK_4	2	2	3	0	0	0	0	0	0	2	1	2	1	1	1	1	0	0	1	0	1	1	0	1	1	2	1	1
Methylomonas LK_5	2	2	2	0	0	0	0	0	0	2	1	2	1	1	1	1	0	0	1	0	1	1	0	1	1	2	1	1

## Sheet: Table S7
Genome	Genome ID	Accession	BRC ID	Start	End	Length	AA Length	Product	GO
Methylomonas sp. LW13	107637	JNLB01000001	fig|107637.3.peg.635	691501	691974	474	157	Type IV pilin PilA
Methylovulum miyakonense HT12	1.07885e+06	AQZU01000006	fig|1078846.3.peg.3272	422018	422470	453	150	Type IV pilin PilA
Methylomonas sp. 11b	1.16817e+06	AZXK01000002	fig|1168169.3.peg.4243	3281930	3282403	474	157	Type IV pilin PilA
Methylomonas koyamae JCM 16701	1.29426e+06	BBCK01000026	fig|1294261.13.peg.2320	21259	21744	486	161	Type IV pilin PilA
Methylomonas sp. Kb3	1.61154e+06	PIZT01000068	fig|1611544.3.peg.2457	228602	229075	474	157	Type IV pilin PilA
Methylomonas sp. DH-1	1.7272e+06	CP014360	fig|1727196.4.peg.3234	3325689	3326165	477	158	Type IV pilin PilA
Methylobacter tundripaludum Tobar13m-G39	173365	JAIPFK010000009	fig|173365.10.peg.911	31280	31726	447	148	Type IV pilin PilA
Methylobacter tundripaludum strain OWC-G53F	173366	PTIY01000003	fig|173365.5.peg.1068	200121	200567	447	148	Type IV pilin PilA
Methylomagnum ishizawai strain RS11D-Pr	1.76099e+06	AP019783	fig|1760988.4.peg.526	563054	563506	453	150	Type IV pilin PilA
Methylomonas sp. ZR1	1.79707e+06	RCST01000001	fig|1797072.3.peg.277	305897	306370	474	157	Type IV pilin PilA
Methylomonas sp. EbA	1.85456e+06	JACXSS010000001	fig|1854563.3.peg.3946	3959458	3959943	486	161	Type IV pilin PilA
Methylomonas sp. EbB	1.85456e+06	JACXST010000001	fig|1854564.3.peg.1929	1940741	1941211	471	156	Type IV pilin PilA
Methylobacter sp. SO_2017_LW4 bin 67	2.05196e+06	JALOCF010000015	fig|2051955.20.peg.4491	19384	19854	471	156	Type IV pilin PilA
Methylobacter sp. SO_2017_GW1 bin 29	2.05196e+06	JALNYY010000034	fig|2051955.21.peg.3615	12267	12728	462	153	Type IV pilin PilA
Methylobacter sp. B4-02	2.05196e+06	JAMJFP010000001	fig|2051955.22.peg.956	40946	41488	543	180	Type IV pilin PilA
Methylobacter sp. LH_M5	2.05196e+06	JAGXGY010000028	fig|2051955.23.peg.1854	3812	4231	420	139	Type IV pilin PilA
Methylobacter sp. strain DP16D_bin.19	2.05196e+06	SCPZ01000125	fig|2051955.9.peg.106	1094	1540	447	148	Type IV pilin PilA
Methylococcus capsulatus str. Bath	243234	NC_002977	fig|243233.7.peg.1541	1609935	1610351	417	138	Type IV pilin PilA
Methylobacter sp. KRF1	2.49775e+06	RYFG01000002	fig|2497749.3.peg.4113	195199	195642	444	147	Type IV pilin PilA
Methylomonas sp. GJ1	2.60898e+06	CP043929	fig|2608981.3.peg.3420	3547671	3548102	432	143	Type IV pilin PilA
Methylomonas sp. LL1	2.78579e+06	CP064653	fig|2785785.3.peg.4576	4702083	4702538	456	151	Type IV pilin PilA
Methylomicrobium sp. RS1	2.80205e+06	JAERVK010000001	fig|2802053.3.peg.1804	353832	354251	420	139	Type IV pilin PilA
Methylomonas sp. EFPC1	2.81265e+06	CP070494	fig|2812647.3.peg.3634	3729045	3729515	471	156	Type IV pilin PilA
Methylobacter whittenburyi strain UCM-B-3033	39770.6	JQNS01000005	fig|39770.6.peg.3402	1219003	1219545	543	180	Type IV pilin PilA
Methylomonas LK_5	416.38	416.38.con.0051	fig|416.38.peg.4032	2470	2931	462	153	Type IV pilin PilA
Methylomonas LK_3	416.39	416.39.con.0032	fig|416.39.peg.2822	7156	7602	447	148	Type IV pilin PilA
Methylomonas LK_4	416.4	416.40.con.0001	fig|416.40.peg.868	874726	875208	483	160	Type IV pilin PilA
Methylomonas sp. strain FW.007	418.6	PERU01000007	fig|418.6.peg.1348	8557	9078	522	173	Type IV pilin PilA
Methylomonas methanica strain R-45363	421.17	LUUG01000109	fig|421.17.peg.4407	32735	33208	474	157	Type IV pilin PilA
Methylomonas methanica strain NCIMB 11130	421.18	LUUF01000067	fig|421.18.peg.2477	21898	22371	474	157	Type IV pilin PilA
Methylomonas methanica strain R-45371	421.19	LUUH01000036	fig|421.19.peg.1445	104732	105214	483	160	Type IV pilin PilA
Methylomonas methanica strain S-1	421.26	SMCN01000020	fig|421.26.peg.3671	53156	53629	474	157	Type IV pilin PilA
Methylobacter LK_1	429.13	429.13.con.0007	fig|429.13.peg.1660	25130	25567	438	145	Type IV pilin PilA
Methylomicrobium buryatense 5G	675511	AOTL01000013	fig|675511.3.peg.2354	441548	442036	489	162	Type IV pilin PilA	GO:0007155|cell adhesion;GO:0009289|fimbrium
Methylomicrobium album BG8	686341	CM001475	fig|686340.8.peg.1211	1253544	1254020	477	158	Type IV pilin PilA
Methylomonas koyamae strain R-49807	702114	LUUL01000141	fig|702114.14.peg.5032	20128	20604	477	158	Type IV pilin PilA
Methylomonas koyamae strain LM6	702114	CP023669	fig|702114.17.peg.3313	3433533	3434009	477	158	Type IV pilin PilA
Methylomonas koyamae strain Fw12E-Y strain SM2	702114	PPPU01000003	fig|702114.21.peg.2830	58592	59068	477	158	Type IV pilin PilA
Methylomonas koyamae strain Fw12E-Y	702114	AP019777	fig|702114.23.peg.1488	1453297	1453782	486	161	Type IV pilin PilA
Methylomonas koyamae strain Fw12E-Y	702114	AP019777	fig|702114.23.peg.2162	2162625	2163089	465	154	Type IV pilin PilA
Methylomonas lenta strain R-45370	980561	LUUI01000109	fig|980561.3.peg.2644	765	1196	432	143	Type IV pilin PilA
Methylomonas sp. LW13	107637	JNLB01000003	fig|107637.3.peg.1256	201501	202820	1320	439	Type I secretion outer membrane protein, TolC family
Methylomonas sp. LW13	107637	JNLB01000017	fig|107637.3.peg.3988	17951	19243	1293	430	Type I secretion outer membrane protein, TolC family
Methylovulum miyakonense HT12	1.07885e+06	AQZU01000003	fig|1078846.3.peg.2166	2073156	2074550	1395	464	Type I secretion outer membrane protein, TolC family
Methylovulum miyakonense HT12	1.07885e+06	AQZU01000006	fig|1078846.3.peg.3270	419735	421075	1341	446	Type I secretion outer membrane protein, TolC family
Methylobacter luteus IMV-B-3098	1.09555e+06	ATYJ01000001	fig|1095552.3.peg.1135	1222257	1223624	1368	455	Type I secretion outer membrane protein, TolC family
Methylobacter luteus IMV-B-3098	1.09555e+06	ATYJ01000001	fig|1095552.3.peg.738	807470	808795	1326	441	Type I secretion outer membrane protein, TolC family
Methylococcaceae bacterium KoM1	1.11647e+06	AYLO01000033	fig|1116472.3.peg.982	33826	35253	1428	475	Type I secretion outer membrane protein, TolC family
Methylomonas sp. MK1	1.13155e+06	AQOV01000001	fig|1131552.3.peg.1944	2049515	2050807	1293	430	Type I secretion outer membrane protein, TolC family
Methylomonas sp. MK1	1.13155e+06	AQOV01000001	fig|1131552.3.peg.193	220456	221775	1320	439	Type I secretion outer membrane protein, TolC family
Methylomonas sp. 11b	1.16817e+06	AZXK01000001	fig|1168169.3.peg.735	747171	748490	1320	439	Type I secretion outer membrane protein, TolC family
Methylomonas sp. 11b	1.16817e+06	AZXK01000002	fig|1168169.3.peg.2014	950735	952027	1293	430	Type I secretion outer membrane protein, TolC family
Methylomonas koyamae JCM 16701	1.29426e+06	BBCK01000046	fig|1294261.13.peg.3296	21667	23040	1374	457	Type I secretion outer membrane protein, TolC family
Methylomonas koyamae JCM 16701	1.29426e+06	BBCK01000067	fig|1294261.13.peg.4076	19897	21225	1329	442	Type I secretion outer membrane protein, TolC family
Methylomonas koyamae JCM 16701	1.29426e+06	BBCK01000193	fig|1294261.13.peg.6114	3124	4674	1551	516	Type I secretion outer membrane protein, TolC family
Methylogaea LK_2	1.29538e+06	1295378.4.con.0027	fig|1295378.4.peg.1516	23406	24776	1371	456	Type I secretion outer membrane protein, TolC family
Methylogaea oryzae strain E10	1.29538e+06	AP019782	fig|1295382.3.peg.1454	1555144	1556667	1524	507	Type I secretion outer membrane protein, TolC family
Methylogaea oryzae strain E10	1.29538e+06	AP019782	fig|1295382.3.peg.474	466356	467726	1371	456	Type I secretion outer membrane protein, TolC family
Methylobacter tundripaludum 21/22	1.40845e+06	JMLA01000001	fig|1408450.3.peg.2207	2341243	2342550	1308	435	Type I secretion outer membrane protein, TolC family
Methylobacter tundripaludum 21/22	1.40845e+06	JMLA01000001	fig|1408450.3.peg.3015	3298889	3300238	1350	449	Type I secretion outer membrane protein, TolC family
Methylobacter tundripaludum 21/22	1.40845e+06	JMLA01000001	fig|1408450.3.peg.804	845695	847065	1371	456	Type I secretion outer membrane protein, TolC family
Methylobacter tundripaludum 31/32	1.40845e+06	JPOH01000001	fig|1408451.3.peg.2033	2149315	2150670	1356	451	Type I secretion outer membrane protein, TolC family
Methylobacter tundripaludum 31/32	1.40845e+06	JPOH01000001	fig|1408451.3.peg.3449	3660879	3662243	1365	454	Type I secretion outer membrane protein, TolC family
Methylobacter tundripaludum 31/32	1.40845e+06	JPOH01000001	fig|1408451.3.peg.4106	4408554	4409903	1350	449	Type I secretion outer membrane protein, TolC family
Methylobacter sp. BBA5.1	1.49506e+06	JQKS01000016	fig|1495064.3.peg.2562	83636	84988	1353	450	Type I secretion outer membrane protein, TolC family
Methylobacter sp. BBA5.1	1.49506e+06	JQKS01000024	fig|1495064.3.peg.3443	54780	56141	1362	453	Type I secretion outer membrane protein, TolC family
Methylomonas denitrificans FJG1	1.53855e+06	JTDD01000016	fig|1538553.4.peg.1110	43051	44370	1320	439	Type I secretion outer membrane protein, TolC family
Methylomonas denitrificans FJG1	1.53855e+06	JTDD01000055	fig|1538553.4.peg.3167	37945	39237	1293	430	Type I secretion outer membrane protein, TolC family
Methylomonas sp. Kb3	1.61154e+06	PIZT01000005	fig|1611544.3.peg.596	77486	78814	1329	442	Type I secretion outer membrane protein, TolC family
Methylomonas sp. Kb3	1.61154e+06	PIZT01000010	fig|1611544.3.peg.3528	176981	178300	1320	439	Type I secretion outer membrane protein, TolC family
Methylomonas sp. DH-1	1.7272e+06	CP014360	fig|1727196.4.peg.2317	2369507	2370880	1374	457	Type I secretion outer membrane protein, TolC family
Methylomonas sp. DH-1	1.7272e+06	CP014360	fig|1727196.4.peg.982	952956	954284	1329	442	Type I secretion outer membrane protein, TolC family
Methylomonas sp. DH-1	1.7272e+06	CP014361	fig|1727196.4.peg.4848	130669	132219	1551	516	Type I secretion outer membrane protein, TolC family
Methylomonas sp. DH-1	1.7272e+06	CP014361	fig|1727196.4.peg.4742	23298	24848	1551	516	Type I secretion outer membrane protein, TolC family
Methylobacter tundripaludum Tobar13m-G39	173365	JAIPFK010000029	fig|173365.10.peg.2913	29573	30943	1371	456	Type I secretion outer membrane protein, TolC family
Methylobacter tundripaludum SO_2017_LW4 bin 69	173365	JALOCG010000063	fig|173365.13.peg.3450	4360	5730	1371	456	Type I secretion outer membrane protein, TolC family
Methylobacter tundripaludum strain OWC-G53F	173366	PTIY01000012	fig|173365.5.peg.3127	117904	119274	1371	456	Type I secretion outer membrane protein, TolC family
Methylobacter tundripaludum strain OWC-DMM	173366	PTIZ01000001	fig|173365.6.peg.373	364327	365265	939	312	Type I secretion outer membrane protein, TolC family
Methylobacter tundripaludum strain OWC-DMM	173366	PTIZ01000004	fig|173365.6.peg.1977	171865	173214	1350	449	Type I secretion outer membrane protein, TolC family
Methylomonas sp. ZR1	1.79707e+06	RCST01000001	fig|1797072.3.peg.1668	1726584	1727903	1320	439	Type I secretion outer membrane protein, TolC family
Methylomonas sp. ZR1	1.79707e+06	RCST01000001	fig|1797072.3.peg.3002	3133496	3134824	1329	442	Type I secretion outer membrane protein, TolC family
Methylomonas sp. EbA	1.85456e+06	JACXSS010000001	fig|1854563.3.peg.1142	1145054	1146382	1329	442	Type I secretion outer membrane protein, TolC family
Methylomonas sp. EbA	1.85456e+06	JACXSS010000001	fig|1854563.3.peg.2185	2212118	2213437	1320	439	Type I secretion outer membrane protein, TolC family
Methylomonas sp. EbA	1.85456e+06	JACXSS010000001	fig|1854563.3.peg.2243	2269101	2270525	1425	474	Type I secretion outer membrane protein, TolC family
Methylomonas sp. EbA	1.85456e+06	JACXSS010000001	fig|1854563.3.peg.3511	3530800	3532122	1323	440	Type I secretion outer membrane protein, TolC family
Methylomonas sp. EbB	1.85456e+06	JACXST010000002	fig|1854564.3.peg.3121	1114170	1115498	1329	442	Type I secretion outer membrane protein, TolC family
Methylomonas sp. EbB	1.85456e+06	JACXST010000003	fig|1854564.3.peg.4396	643309	644628	1320	439	Type I secretion outer membrane protein, TolC family
Methylomonas sp. LWB	1.90585e+06	MKMC01000033	fig|1905845.3.peg.3098	5323	6867	1545	514	Type I secretion outer membrane protein, TolC family
Methylomonas sp. LWB	1.90585e+06	MKMC01000044	fig|1905845.3.peg.3636	2130	3467	1338	445	Type I secretion outer membrane protein, TolC family
Methylomonas sp. LWB	1.90585e+06	MKMC01000045	fig|1905845.3.peg.3816	173220	174545	1326	441	Type I secretion outer membrane protein, TolC family
Methylomonas sp. LWB	1.90585e+06	MKMC01000067	fig|1905845.3.peg.4518	108162	109490	1329	442	Type I secretion outer membrane protein, TolC family
Methylobacter sp. UBA2091	1.94686e+06	DCZF01000002	fig|1946861.3.peg.2712	1596	2945	1350	449	Type I secretion outer membrane protein, TolC family
Methylobacter sp. UBA2091	1.94686e+06	DCZF01000029	fig|1946861.3.peg.353	26802	28232	1431	476	Type I secretion outer membrane protein, TolC family
Methylobacter sp. UBA2091	1.94686e+06	DCZF01000042	fig|1946861.3.peg.1155	193293	194618	1326	441	Type I secretion outer membrane protein, TolC family
Methylobacter sp. UBA6696	1.94686e+06	DKJI01000041	fig|1946862.3.peg.3206	14572	14772	201	66	Type I secretion outer membrane protein, TolC family
Methylobacter sp. UBA6696	1.94686e+06	DKJI01000077	fig|1946862.3.peg.2771	24979	26409	1431	476	Type I secretion outer membrane protein, TolC family
Methylobacter sp. UBA6696	1.94686e+06	DKJI01000083	fig|1946862.3.peg.1378	25922	27247	1326	441	Type I secretion outer membrane protein, TolC family
Methylobacter sp. UBA6696	1.94686e+06	DKJI01000101	fig|1946862.3.peg.2449	4392	5825	1434	477	Type I secretion outer membrane protein, TolC family
Methylobacter sp. UBA6696	1.94686e+06	DKJI01000120	fig|1946862.3.peg.3994	39077	40426	1350	449	Type I secretion outer membrane protein, TolC family
Methylobacter sp. UBA6712	1.94686e+06	DKIS01000088	fig|1946864.3.peg.1415	72776	74101	1326	441	Type I secretion outer membrane protein, TolC family
Methylobacter sp. UBA6712	1.94686e+06	DKIS01000095	fig|1946864.3.peg.2132	79478	80827	1350	449	Type I secretion outer membrane protein, TolC family
Methylobacter sp. strain FW305_bin.9	2.05196e+06	SCTW01000033	fig|2051955.10.peg.4587	20503	21858	1356	451	Type I secretion outer membrane protein, TolC family
Methylobacter sp. SO_2017_LW4 bin 67	2.05196e+06	JALOCF010000006	fig|2051955.20.peg.2921	42509	43876	1368	455	Type I secretion outer membrane protein, TolC family
Methylobacter sp. SO_2017_GW1 bin 29	2.05196e+06	JALNYY010000022	fig|2051955.21.peg.2926	29413	30762	1350	449	Type I secretion outer membrane protein, TolC family
Methylobacter sp. B4-02	2.05196e+06	JAMJFP010000009	fig|2051955.22.peg.4756	68985	70337	1353	450	Type I secretion outer membrane protein, TolC family
Methylobacter sp. B4-02	2.05196e+06	JAMJFP010000038	fig|2051955.22.peg.2406	10108	11469	1362	453	Type I secretion outer membrane protein, TolC family
Methylobacter sp. LH_M5	2.05196e+06	JAGXGY010000038	fig|2051955.23.peg.2325	9268	10593	1326	441	Type I secretion outer membrane protein, TolC family
Methylobacter sp. LH_M5	2.05196e+06	JAGXGY010000054	fig|2051955.23.peg.338	11489	12805	1317	438	Type I secretion outer membrane protein, TolC family
Methylobacter sp. LH_M5	2.05196e+06	JAGXGY010000060	fig|2051955.23.peg.639	22951	24327	1377	458	Type I secretion outer membrane protein, TolC family
Methylobacter sp. strain DP16D_bin.19	2.05196e+06	SCPZ01000084	fig|2051955.9.peg.2958	3868	5253	1386	461	Type I secretion outer membrane protein, TolC family
Methylobacter sp. strain DP16D_bin.19	2.05196e+06	SCPZ01000097	fig|2051955.9.peg.3429	135207	136529	1323	440	Type I secretion outer membrane protein, TolC family
Methylococcus capsulatus str. Bath	243234	NC_002977	fig|243233.7.peg.1311	1360555	1361994	1440	479	Type I secretion outer membrane protein, TolC family
Methylococcus capsulatus str. Bath	243234	NC_002977	fig|243233.7.peg.1751	1841631	1842941	1311	436	Type I secretion outer membrane protein, TolC family
Methylobacter sp. KRF1	2.49775e+06	RYFG01000017	fig|2497749.3.peg.1321	64630	65952	1323	440	Type I secretion outer membrane protein, TolC family
Methylobacter sp. KRF1	2.49775e+06	RYFG01000061	fig|2497749.3.peg.3788	6709	8079	1371	456	Type I secretion outer membrane protein, TolC family
Methylomonas sp. GJ1	2.60898e+06	CP043929	fig|2608981.3.peg.3887	4085500	4086813	1314	437	Type I secretion outer membrane protein, TolC family
Methylomicrobium alcaliphilum strain 20Z	271065	FO082060	fig|271065.3.peg.989	1094389	1095915	1527	508	Type I secretion outer membrane protein, TolC family
Methylomicrobium alcaliphilum strain 20Z	271065	FO082060	fig|271065.3.peg.2410	2678107	2679453	1347	448	Type I secretion outer membrane protein, TolC family
Methylomicrobium alcaliphilum strain 20Z	271065	FO082060	fig|271065.3.peg.3808	4262495	4263865	1371	456	Type I secretion outer membrane protein, TolC family
Methylomonas sp. LL1	2.78579e+06	CP064653	fig|2785785.3.peg.427	440533	441843	1311	436	Type I secretion outer membrane protein, TolC family
Methylomicrobium sp. RS1	2.80205e+06	JAERVK010000008	fig|2802053.3.peg.4357	95767	97176	1410	469	Type I secretion outer membrane protein, TolC family
Methylomicrobium sp. RS1	2.80205e+06	JAERVK010000011	fig|2802053.3.peg.215	12135	13484	1350	449	Type I secretion outer membrane protein, TolC family
Methylomonas sp. EFPC1	2.81265e+06	CP070494	fig|2812647.3.peg.1105	1108882	1110210	1329	442	Type I secretion outer membrane protein, TolC family
Methylomonas sp. EFPC1	2.81265e+06	CP070494	fig|2812647.3.peg.2604	2632248	2633567	1320	439	Type I secretion outer membrane protein, TolC family
Methylobacter whittenburyi strain ACM 3310	39770.3	JQNS01000007	fig|39770.3.peg.5070	1454755	1456107	1353	450	Type I secretion outer membrane protein, TolC family
Methylobacter whittenburyi strain ACM 3310	39770.3	JQNS01000007	fig|39770.3.peg.3877	186286	187647	1362	453	Type I secretion outer membrane protein, TolC family
Methylobacter whittenburyi strain UCM-B-3033	39770.6	JQNS01000007	fig|39770.6.peg.5345	1454755	1456107	1353	450	Type I secretion outer membrane protein, TolC family
Methylobacter whittenburyi strain UCM-B-3033	39770.6	JQNS01000007	fig|39770.6.peg.4090	186286	187647	1362	453	Type I secretion outer membrane protein, TolC family
Methylomicrobium agile strain ATCC 35068	39774.3	JPOJ01000001	fig|39774.3.peg.2363	2449796	2451034	1239	412	Type I secretion outer membrane protein, TolC family
Methylomicrobium agile strain ATCC 35068	39774.3	JPOJ01000001	fig|39774.3.peg.3624	3810074	3811426	1353	450	Type I secretion outer membrane protein, TolC family
Methylomonas LK_5	416.38	416.38.con.0009	fig|416.38.peg.1644	119070	120419	1350	449	Type I secretion outer membrane protein, TolC family
Methylomonas LK_4	416.38	416.38.con.0021	fig|416.38.peg.2648	4942	6246	1305	434	Type I secretion outer membrane protein, TolC family
Methylomonas LK_3	416.39	416.39.con.0036	fig|416.39.peg.3015	35269	36579	1311	436	Type I secretion outer membrane protein, TolC family
Methylomonas LK_4	416.4	416.40.con.0002	fig|416.40.peg.1214	244318	245628	1311	436	Type I secretion outer membrane protein, TolC family
Methylomonas LK_4	416.4	416.40.con.0012	fig|416.40.peg.3267	116662	117966	1305	434	Type I secretion outer membrane protein, TolC family
Methylomonas sp. SO_2017_LW3 bin 4	418.2	JALOBS010000023	fig|418.20.peg.4245	80083	81438	1356	451	Type I secretion outer membrane protein, TolC family
Methylomonas sp. strain FW.007	418.6	PERU01000011	fig|418.6.peg.1860	88206	89513	1308	435	Type I secretion outer membrane protein, TolC family
Methylomonas sp. strain FW.007	418.6	PERU01000016	fig|418.6.peg.2326	75692	76996	1305	434	Type I secretion outer membrane protein, TolC family
Methylomonas sp. strain FW.007	418.6	PERU01000019	fig|418.6.peg.2495	5695	7044	1350	449	Type I secretion outer membrane protein, TolC family
Methylomonas methanica strain R-45363	421.17	LUUG01000062	fig|421.17.peg.2090	49179	50507	1329	442	Type I secretion outer membrane protein, TolC family
Methylomonas methanica strain R-45363	421.17	LUUG01000139	fig|421.17.peg.5254	31358	32686	1329	442	Type I secretion outer membrane protein, TolC family
Methylomonas methanica strain NCIMB 11130	421.18	LUUF01000019	fig|421.18.peg.733	178869	180197	1329	442	Type I secretion outer membrane protein, TolC family
Methylomonas methanica strain NCIMB 11130	421.18	LUUF01000086	fig|421.18.peg.3194	73918	75237	1320	439	Type I secretion outer membrane protein, TolC family
Methylomonas methanica strain R-45371	421.19	LUUH01000065	fig|421.19.peg.3251	59285	60613	1329	442	Type I secretion outer membrane protein, TolC family
Methylomonas methanica strain R-45371	421.19	LUUH01000088	fig|421.19.peg.4595	47449	48777	1329	442	Type I secretion outer membrane protein, TolC family
Methylomonas methanica strain S-1	421.26	SMCN01000004	fig|421.26.peg.1341	256375	257694	1320	439	Type I secretion outer membrane protein, TolC family
Methylomonas methanica strain S-1	421.26	SMCN01000005	fig|421.26.peg.1432	42574	43902	1329	442	Type I secretion outer membrane protein, TolC family
Methylobacter LK_1	429.13	429.13.con.0001	fig|429.13.peg.79	137151	138500	1350	449	Type I secretion outer membrane protein, TolC family
Methylobacter marinus A45	674036	ARVS01000004	fig|674036.3.peg.2892	553956	555308	1353	450	Type I secretion outer membrane protein, TolC family
Methylobacter marinus A45	674036	ARVS01000008	fig|674036.3.peg.4304	431485	432846	1362	453	Type I secretion outer membrane protein, TolC family
Methylomicrobium buryatense 5G	675511	AOTL01000013	fig|675511.3.peg.2037	75767	77113	1347	448	Type I secretion outer membrane protein, TolC family
Methylomicrobium buryatense 5G	675511	AOTL01000019	fig|675511.3.peg.3639	10271	11641	1371	456	Type I secretion outer membrane protein, TolC family
Methylomicrobium buryatense 5G	675511	AOTL01000025	fig|675511.3.peg.4630	110908	112485	1578	525	Type I secretion outer membrane protein, TolC family
Methylomicrobium album BG8	686341	CM001475	fig|686340.8.peg.2326	2382731	2384140	1410	469	Type I secretion outer membrane protein, TolC family
Methylomicrobium album BG8	686341	CM001475	fig|686340.8.peg.951	989401	990795	1395	464	Type I secretion outer membrane protein, TolC family
Methylobacter tundripaludum SV96	697282	NZ_AEGW01000002	fig|697282.3.peg.888	370726	372090	1365	454	Type I secretion outer membrane protein, TolC family
Methylobacter tundripaludum SV96	697282	NZ_AEGW01000004	fig|697282.3.peg.1449	22861	24231	1371	456	Type I secretion outer membrane protein, TolC family
Methylobacter tundripaludum SV96	697282	NZ_AEGW01000016	fig|697282.3.peg.3862	70443	71792	1350	449	Type I secretion outer membrane protein, TolC family
Methylobacter tundripaludum SV96	697282	NZ_AEGW01000047	fig|697282.3.peg.4615	113	1054	942	313	Type I secretion outer membrane protein, TolC family
Methylomonas koyamae strain R-45383	702114	LUUK01000060	fig|702114.13.peg.1320	3383	4927	1545	514	Type I secretion outer membrane protein, TolC family
Methylomonas koyamae strain R-45383	702114	LUUK01000167	fig|702114.13.peg.2840	2667	3992	1326	441	Type I secretion outer membrane protein, TolC family
Methylomonas koyamae strain R-45383	702114	LUUK01000178	fig|702114.13.peg.3472	29999	31327	1329	442	Type I secretion outer membrane protein, TolC family
Methylomonas koyamae strain R-45383	702114	LUUK01000230	fig|702114.13.peg.5356	48036	49373	1338	445	Type I secretion outer membrane protein, TolC family
Methylomonas koyamae strain R-49807	702114	LUUL01000014	fig|702114.14.peg.192	116	1636	1521	506	Type I secretion outer membrane protein, TolC family
Methylomonas koyamae strain R-49807	702114	LUUL01000087	fig|702114.14.peg.3281	33178	34551	1374	457	Type I secretion outer membrane protein, TolC family
Methylomonas koyamae strain R-49807	702114	LUUL01000094	fig|702114.14.peg.3641	38735	40063	1329	442	Type I secretion outer membrane protein, TolC family
Methylomonas koyamae strain R-45378	702114	LUUJ01000034	fig|702114.15.peg.363	35299	36627	1329	442	Type I secretion outer membrane protein, TolC family
Methylomonas koyamae strain R-45378	702114	LUUJ01000084	fig|702114.15.peg.2576	53466	54839	1374	457	Type I secretion outer membrane protein, TolC family
Methylomonas koyamae strain LM6	702114	CP023669	fig|702114.17.peg.2399	2461085	2462458	1374	457	Type I secretion outer membrane protein, TolC family
Methylomonas koyamae strain LM6	702114	CP023669	fig|702114.17.peg.972	970802	972130	1329	442	Type I secretion outer membrane protein, TolC family
Methylomonas koyamae strain Fw12E-Y strain SM2	702114	PPPU01000007	fig|702114.21.peg.4203	98031	99365	1335	444	Type I secretion outer membrane protein, TolC family
Methylomonas koyamae strain Fw12E-Y strain SM2	702114	PPPU01000025	fig|702114.21.peg.1851	44480	45808	1329	442	Type I secretion outer membrane protein, TolC family
Methylomonas koyamae strain Fw12E-Y	702114	AP019777	fig|702114.23.peg.2395	2469522	2470895	1374	457	Type I secretion outer membrane protein, TolC family
Methylomonas koyamae strain Fw12E-Y	702114	AP019777	fig|702114.23.peg.902	871826	873154	1329	442	Type I secretion outer membrane protein, TolC family
Methylomonas koyamae strain Fw12E-Y	702114	AP019778	fig|702114.23.peg.4888	207031	208581	1551	516	Type I secretion outer membrane protein, TolC family
Methylomonas methanica MC09	857087	NC_015572	fig|857087.3.peg.639	679770	681086	1317	438	Type I secretion outer membrane protein, TolC family
Methylomonas lenta strain R-45370	980561	LUUI01000117	fig|980561.3.peg.3053	9105	10457	1353	450	Type I secretion outer membrane protein, TolC family
Methylomonas sp. LW13	107637	JNLB01000017	fig|107637.3.peg.3986	15891	17249	1359	452	Type I secretion membrane fusion protein, HlyD family
Methylovulum miyakonense HT12	1.07885e+06	AQZU01000006	fig|1078846.3.peg.3269	418384	419730	1347	448	Type I secretion membrane fusion protein, HlyD family
Methylomonas sp. 11b	1.16817e+06	AZXK01000002	fig|1168169.3.peg.2016	952729	954087	1359	452	Type I secretion membrane fusion protein, HlyD family
Methylomonas koyamae JCM 16701	1.29426e+06	BBCK01000011	fig|1294261.13.peg.1329	68783	70099	1317	438	Type I secretion membrane fusion protein, HlyD family
Methylomonas koyamae JCM 16701	1.29426e+06	BBCK01000067	fig|1294261.13.peg.4074	17868	19226	1359	452	Type I secretion membrane fusion protein, HlyD family
Methylogaea LK_2	1.29538e+06	1295378.4.con.0018	fig|1295378.4.peg.1106	7037	8554	1518	505	Type I secretion membrane fusion protein, HlyD family
Methylogaea oryzae strain E10	1.29538e+06	AP019782	fig|1295382.3.peg.905	922927	924258	1332	443	Type I secretion membrane fusion protein, HlyD family
Methylocaldum sp. 175 strain 175	1.5281e+06	FXAM01000001	fig|1528100.4.peg.4536	3953034	3954362	1329	442	Type I secretion membrane fusion protein, HlyD family
Methylomonas denitrificans FJG1	1.53855e+06	JTDD01000055	fig|1538553.4.peg.3170	40106	41296	1191	396	Type I secretion membrane fusion protein, HlyD family
Methylomonas sp. Kb3	1.61154e+06	PIZT01000005	fig|1611544.3.peg.598	79480	80838	1359	452	Type I secretion membrane fusion protein, HlyD family
Methylomonas sp. DH-1	1.7272e+06	CP014360	fig|1727196.4.peg.3847	3941013	3942329	1317	438	Type I secretion membrane fusion protein, HlyD family
Methylomagnum ishizawai strain RS11D-Pr	1.76099e+06	AP019783	fig|1760988.4.peg.1109	1114756	1116084	1329	442	Type I secretion membrane fusion protein, HlyD family
Methylomonas sp. ZR1	1.79707e+06	RCST01000001	fig|1797072.3.peg.3004	3135490	3136848	1359	452	Type I secretion membrane fusion protein, HlyD family
Methylomonas sp. EbA	1.85456e+06	JACXSS010000001	fig|1854563.3.peg.1140	1143026	1144387	1362	453	Type I secretion membrane fusion protein, HlyD family @ Type I secretion system, membrane fusion protein LapC
Methylomonas sp. EbA	1.85456e+06	JACXSS010000001	fig|1854563.3.peg.3512	3532127	3533449	1323	440	Type I secretion membrane fusion protein, HlyD family
Methylomonas sp. EbB	1.85456e+06	JACXST010000002	fig|1854564.3.peg.3123	1116164	1117522	1359	452	Type I secretion membrane fusion protein, HlyD family
Methylomonas sp. LWB	1.90585e+06	MKMC01000044	fig|1905845.3.peg.3637	3471	4805	1335	444	Type I secretion membrane fusion protein, HlyD family
Methylomonas sp. LWB	1.90585e+06	MKMC01000067	fig|1905845.3.peg.4520	110152	111510	1359	452	Type I secretion membrane fusion protein, HlyD family
Methylobacter sp. UBA2091	1.94686e+06	DCZF01000042	fig|1946861.3.peg.1156	194624	195949	1326	441	Type I secretion membrane fusion protein, HlyD family
Methylobacter sp. UBA6696	1.94686e+06	DKJI01000083	fig|1946862.3.peg.1377	24591	25916	1326	441	Type I secretion membrane fusion protein, HlyD family
Methylobacter sp. UBA6712	1.94686e+06	DKIS01000088	fig|1946864.3.peg.1414	71445	72770	1326	441	Type I secretion membrane fusion protein, HlyD family
Methylobacter sp. B4-02	2.05196e+06	JAMJFP010000009	fig|2051955.22.peg.4758	71119	72474	1356	451	Type I secretion membrane fusion protein, HlyD family
Methylobacter sp. LH_M5	2.05196e+06	JAGXGY010000054	fig|2051955.23.peg.339	12811	14130	1320	439	Type I secretion membrane fusion protein, HlyD family
Methylobacter sp. LH_M5	2.05196e+06	JAGXGY010000060	fig|2051955.23.peg.632	16519	17874	1356	451	Type I secretion membrane fusion protein, HlyD family
Methylobacter sp. strain DP16D_bin.19	2.05196e+06	SCPZ01000097	fig|2051955.9.peg.3430	136535	137887	1353	450	Type I secretion membrane fusion protein, HlyD family
Methylobacter sp. KRF1	2.49775e+06	RYFG01000017	fig|2497749.3.peg.1320	63298	64623	1326	441	Type I secretion membrane fusion protein, HlyD family
Methylomonas sp. GJ1	2.60898e+06	CP043929	fig|2608981.3.peg.3701	3885041	3886363	1323	440	Type I secretion membrane fusion protein, HlyD family
Methylomicrobium alcaliphilum strain 20Z	271065	FO082060	fig|271065.3.peg.988	1093059	1094384	1326	441	Type I secretion membrane fusion protein, HlyD family
Methylomicrobium alcaliphilum strain 20Z	271065	FO082060	fig|271065.3.peg.3812	4267740	4269080	1341	446	Type I secretion membrane fusion protein, HlyD family
Methylomicrobium sp. RS1	2.80205e+06	JAERVK010000011	fig|2802053.3.peg.214	10802	12124	1323	440	Type I secretion membrane fusion protein, HlyD family
Methylomonas sp. EFPC1	2.81265e+06	CP070494	fig|2812647.3.peg.1103	1106858	1108216	1359	452	Type I secretion membrane fusion protein, HlyD family
Methylomicrobium agile strain ATCC 35068	39774.3	JPOJ01000001	fig|39774.3.peg.4104	4387664	4389025	1362	453	Type I secretion membrane fusion protein, HlyD family
Methylomonas LK_4	416.4	416.40.con.0005	fig|416.40.peg.2188	104423	105751	1329	442	Type I secretion membrane fusion protein, HlyD family
Methylomonas LK_4	416.4	416.40.con.0016	fig|416.40.peg.3534	17641	18969	1329	442	Type I secretion membrane fusion protein, HlyD family
Methylomonas sp. strain FW.007	418.6	PERU01000011	fig|418.6.peg.1861	89527	90840	1314	437	Type I secretion membrane fusion protein, HlyD family
Methylomonas methanica strain R-45363	421.17	LUUG01000139	fig|421.17.peg.5252	29334	30692	1359	452	Type I secretion membrane fusion protein, HlyD family
Methylomonas methanica strain NCIMB 11130	421.18	LUUF01000019	fig|421.18.peg.735	180863	182221	1359	452	Type I secretion membrane fusion protein, HlyD family
Methylomonas methanica strain R-45371	421.19	LUUH01000088	fig|421.19.peg.4593	45425	46783	1359	452	Type I secretion membrane fusion protein, HlyD family
Methylomonas methanica strain S-1	421.26	SMCN01000005	fig|421.26.peg.1430	40550	41908	1359	452	Type I secretion membrane fusion protein, HlyD family
Methylomicrobium buryatense 5G	675511	AOTL01000019	fig|675511.3.peg.3635	5053	6393	1341	446	Type I secretion membrane fusion protein, HlyD family
Methylomicrobium buryatense 5G	675511	AOTL01000025	fig|675511.3.peg.4629	109614	110939	1326	441	Type I secretion membrane fusion protein, HlyD family
Methylomicrobium album BG8	686341	CM001475	fig|686340.8.peg.2826	2911957	2913318	1362	453	Type I secretion membrane fusion protein, HlyD family
Methylomicrobium album BG8	686341	CM001475	fig|686340.8.peg.950	988071	989393	1323	440	Type I secretion membrane fusion protein, HlyD family
Methylomonas koyamae strain R-45383	702114	LUUK01000178	fig|702114.13.peg.3474	31989	33347	1359	452	Type I secretion membrane fusion protein, HlyD family
Methylomonas koyamae strain R-45383	702114	LUUK01000230	fig|702114.13.peg.5357	49377	50711	1335	444	Type I secretion membrane fusion protein, HlyD family
Methylomonas koyamae strain R-49807	702114	LUUL01000062	fig|702114.14.peg.1602	44158	45474	1317	438	Type I secretion membrane fusion protein, HlyD family
Methylomonas koyamae strain R-45378	702114	LUUJ01000049	fig|702114.15.peg.819	68273	69589	1317	438	Type I secretion membrane fusion protein, HlyD family
Methylomonas koyamae strain LM6	702114	CP023669	fig|702114.17.peg.3896	4028659	4029975	1317	438	Type I secretion membrane fusion protein, HlyD family
Methylomonas koyamae strain Fw12E-Y strain SM2	702114	PPPU01000025	fig|702114.21.peg.1849	42441	43805	1365	454	Type I secretion membrane fusion protein, HlyD family
Methylomonas koyamae strain Fw12E-Y strain SM2	702114	PPPU01000030	fig|702114.21.peg.2460	34412	35728	1317	438	Type I secretion membrane fusion protein, HlyD family
Methylomonas koyamae strain Fw12E-Y	702114	AP019777	fig|702114.23.peg.3856	3988521	3989837	1317	438	Type I secretion membrane fusion protein, HlyD family
Methylomonas koyamae strain Fw12E-Y	702114	AP019777	fig|702114.23.peg.900	869797	871155	1359	452	Type I secretion membrane fusion protein, HlyD family
Methylomonas sp. LW13	107637	JNLB01000017	fig|107637.3.peg.3985	13739	15889	2151	716	Type I secretion system ATPase
Methylovulum miyakonense HT12	1.07885e+06	AQZU01000006	fig|1078846.3.peg.3268	416681	418387	1707	568	Type I secretion system ATPase
Methylobacter luteus IMV-B-3098	1.09555e+06	ATYJ01000001	fig|1095552.3.peg.743	815394	817064	1671	556	Type I secretion system ATPase
Methylomonas sp. MK1	1.13155e+06	AQOV01000001	fig|1131552.3.peg.1947	2052869	2055019	2151	716	Type I secretion system ATPase
Methylomonas sp. 11b	1.16817e+06	AZXK01000002	fig|1168169.3.peg.2017	954089	956239	2151	716	Type I secretion system ATPase
Methylomonas koyamae JCM 16701	1.29426e+06	BBCK01000011	fig|1294261.13.peg.1327	67053	67970	918	305	Type I secretion system ATPase
Methylomonas koyamae JCM 16701	1.29426e+06	BBCK01000011	fig|1294261.13.peg.1328	67988	68779	792	263	Type I secretion system ATPase
Methylomonas koyamae JCM 16701	1.29426e+06	BBCK01000067	fig|1294261.13.peg.4072	15716	16513	798	265	Type I secretion system ATPase
Methylomonas koyamae JCM 16701	1.29426e+06	BBCK01000067	fig|1294261.13.peg.4073	16555	17865	1311	436	Type I secretion system ATPase
Methylogaea LK_2	1.29538e+06	1295378.4.con.0018	fig|1295378.4.peg.1105	4971	7040	2070	689	Type I secretion system ATPase
Methylogaea oryzae strain E10	1.29538e+06	AP019782	fig|1295382.3.peg.904	921175	922899	1725	574	Type I secretion system ATPase
Methylobacter sp. BBA5.1	1.49506e+06	JQKS01000016	fig|1495064.3.peg.2559	79242	81422	2181	726	Type I secretion system ATPase
Methylocaldum sp. 175 strain 175	1.5281e+06	FXAM01000001	fig|1528100.4.peg.2720	2049168	2050883	1716	571	Type I secretion system ATPase
Methylocaldum sp. 175 strain 175	1.5281e+06	FXAM01000001	fig|1528100.4.peg.4537	3954384	3956156	1773	590	Type I secretion system ATPase
Methylomonas denitrificans FJG1	1.53855e+06	JTDD01000055	fig|1538553.4.peg.3171	41298	42533	1236	411	Type I secretion system ATPase
Methylomonas denitrificans FJG1	1.53855e+06	JTDD01000055	fig|1538553.4.peg.3172	42530	43447	918	305	Type I secretion system ATPase
Methylomonas sp. Kb3	1.61154e+06	PIZT01000005	fig|1611544.3.peg.599	80840	82990	2151	716	Type I secretion system ATPase
Methylomonas sp. DH-1	1.7272e+06	CP014360	fig|1727196.4.peg.3848	3942333	3944060	1728	575	Type I secretion system ATPase
Methylomonas sp. DH-1	1.7272e+06	CP014360	fig|1727196.4.peg.979	948772	950922	2151	716	Type I secretion system ATPase
Methylomagnum ishizawai strain RS11D-Pr	1.76099e+06	AP019783	fig|1760988.4.peg.1108	1112962	1114734	1773	590	Type I secretion system ATPase
Methylomagnum ishizawai strain RS11D-Pr	1.76099e+06	AP019783	fig|1760988.4.peg.3286	3379248	3380963	1716	571	Type I secretion system ATPase
Methylomonas sp. ZR1	1.79707e+06	RCST01000001	fig|1797072.3.peg.3005	3136850	3139000	2151	716	Type I secretion system ATPase
Methylomonas sp. EbA	1.85456e+06	JACXSS010000001	fig|1854563.3.peg.1139	1140876	1143026	2151	716	Type I secretion system ATPase
Methylomonas sp. EbA	1.85456e+06	JACXSS010000001	fig|1854563.3.peg.3513	3533455	3535194	1740	579	Type I secretion system ATPase
Methylomonas sp. EbB	1.85456e+06	JACXST010000002	fig|1854564.3.peg.3124	1117524	1119674	2151	716	Type I secretion system ATPase
Methylomonas sp. LWB	1.90585e+06	MKMC01000044	fig|1905845.3.peg.3638	4831	6528	1698	565	Type I secretion system ATPase
Methylomonas sp. LWB	1.90585e+06	MKMC01000067	fig|1905845.3.peg.4521	111507	113654	2148	715	Type I secretion system ATPase
Methylobacter sp. UBA2091	1.94686e+06	DCZF01000042	fig|1946861.3.peg.1157	195962	197674	1713	570	Type I secretion system ATPase
Methylobacter sp. UBA6696	1.94686e+06	DKJI01000083	fig|1946862.3.peg.1376	22866	24578	1713	570	Type I secretion system ATPase
Methylobacter sp. UBA6712	1.94686e+06	DKIS01000088	fig|1946864.3.peg.1413	69721	71433	1713	570	Type I secretion system ATPase
Methylobacter sp. B4-02	2.05196e+06	JAMJFP010000009	fig|2051955.22.peg.4759	72551	74731	2181	726	Type I secretion system ATPase
Methylobacter sp. LH_M5	2.05196e+06	JAGXGY010000054	fig|2051955.23.peg.340	14143	15858	1716	571	Type I secretion system ATPase
Methylobacter sp. LH_M5	2.05196e+06	JAGXGY010000060	fig|2051955.23.peg.633	17882	20083	2202	733	Type I secretion system ATPase
Methylobacter sp. strain DP16D_bin.19	2.05196e+06	SCPZ01000097	fig|2051955.9.peg.3431	137894	139597	1704	567	Type I secretion system ATPase
Methylobacter sp. KRF1	2.49775e+06	RYFG01000017	fig|2497749.3.peg.1319	61566	63284	1719	572	Type I secretion system ATPase
Methylomonas sp. GJ1	2.60898e+06	CP043929	fig|2608981.3.peg.3700	3883295	3885031	1737	578	Type I secretion system ATPase
Methylomicrobium alcaliphilum strain 20Z	271065	FO082060	fig|271065.3.peg.987	1091340	1093043	1704	567	Type I secretion system ATPase
Methylomicrobium alcaliphilum strain 20Z	271065	FO082060	fig|271065.3.peg.3811	4265542	4267722	2181	726	Type I secretion system ATPase
Methylomicrobium sp. RS1	2.80205e+06	JAERVK010000011	fig|2802053.3.peg.213	9074	10783	1710	569	Type I secretion system ATPase
Methylomonas sp. EFPC1	2.81265e+06	CP070494	fig|2812647.3.peg.1102	1104706	1106856	2151	716	Type I secretion system ATPase
Methylobacter whittenburyi strain ACM 3310	39770.3	JQNS01000007	fig|39770.3.peg.5067	1450361	1452541	2181	726	Type I secretion system ATPase
Methylobacter whittenburyi strain UCM-B-3033	39770.6	JQNS01000007	fig|39770.6.peg.5342	1450361	1452541	2181	726	Type I secretion system ATPase
Methylomicrobium agile strain ATCC 35068	39774.3	JPOJ01000001	fig|39774.3.peg.2361	2446624	2448333	1710	569	Type I secretion system ATPase
Methylomicrobium agile strain ATCC 35068	39774.3	JPOJ01000001	fig|39774.3.peg.4103	4385422	4387596	2175	724	Type I secretion system ATPase
Methylomonas LK_5	416.38	416.38.con.0021	fig|416.38.peg.2646	1885	3603	1719	572	Type I secretion system ATPase
Methylomonas LK_5	416.38	416.38.con.0027	fig|416.38.peg.3052	21354	23084	1731	576	Type I secretion system ATPase
Methylomonas LK_3	416.39	416.39.con.0028	fig|416.39.peg.2692	40844	42556	1713	570	Type I secretion system ATPase
Methylomonas LK_4	416.4	416.40.con.0005	fig|416.40.peg.2187	102678	104408	1731	576	Type I secretion system ATPase
Methylomonas LK_4	416.4	416.40.con.0012	fig|416.40.peg.3269	119305	121023	1719	572	Type I secretion system ATPase
Methylomonas LK_4	416.4	416.40.con.0016	fig|416.40.peg.3533	15897	17627	1731	576	Type I secretion system ATPase
Methylomonas sp. strain FW.007	418.6	PERU01000011	fig|418.6.peg.1862	90873	92612	1740	579	Type I secretion system ATPase
Methylomonas sp. strain FW.007	418.6	PERU01000016	fig|418.6.peg.2328	78335	80053	1719	572	Type I secretion system ATPase
Methylomonas methanica strain R-45363	421.17	LUUG01000139	fig|421.17.peg.5251	27182	29332	2151	716	Type I secretion system ATPase
Methylomonas methanica strain NCIMB 11130	421.18	LUUF01000019	fig|421.18.peg.736	182223	184373	2151	716	Type I secretion system ATPase
Methylomonas methanica strain R-45371	421.19	LUUH01000088	fig|421.19.peg.4592	43273	45423	2151	716	Type I secretion system ATPase
Methylomonas methanica strain S-1	421.26	SMCN01000005	fig|421.26.peg.1429	38398	40548	2151	716	Type I secretion system ATPase
Methylobacter marinus A45	674036	ARVS01000004	fig|674036.3.peg.2895	557522	559702	2181	726	Type I secretion system ATPase
Methylomicrobium buryatense 5G	675511	AOTL01000019	fig|675511.3.peg.3636	6411	8591	2181	726	Type I secretion system ATPase
Methylomicrobium buryatense 5G	675511	AOTL01000025	fig|675511.3.peg.4628	108069	109607	1539	512	Type I secretion system ATPase
Methylomicrobium album BG8	686341	CM001475	fig|686340.8.peg.2825	2909716	2911890	2175	724	Type I secretion system ATPase
Methylomicrobium album BG8	686341	CM001475	fig|686340.8.peg.949	986340	988052	1713	570	Type I secretion system ATPase
Methylomonas koyamae strain R-45383	702114	LUUK01000178	fig|702114.13.peg.3475	33344	35491	2148	715	Type I secretion system ATPase
Methylomonas koyamae strain R-45383	702114	LUUK01000230	fig|702114.13.peg.5358	50737	52434	1698	565	Type I secretion system ATPase
Methylomonas koyamae strain R-49807	702114	LUUL01000062	fig|702114.14.peg.1601	42427	44154	1728	575	Type I secretion system ATPase
Methylomonas koyamae strain R-49807	702114	LUUL01000094	fig|702114.14.peg.3644	42097	44247	2151	716	Type I secretion system ATPase
Methylomonas koyamae strain R-45378	702114	LUUJ01000034	fig|702114.15.peg.366	38661	40811	2151	716	Type I secretion system ATPase
Methylomonas koyamae strain R-45378	702114	LUUJ01000049	fig|702114.15.peg.820	69593	71320	1728	575	Type I secretion system ATPase
Methylomonas koyamae strain LM6	702114	CP023669	fig|702114.17.peg.3897	4029979	4031706	1728	575	Type I secretion system ATPase
Methylomonas koyamae strain LM6	702114	CP023669	fig|702114.17.peg.969	966618	968768	2151	716	Type I secretion system ATPase
Methylomonas koyamae strain Fw12E-Y strain SM2	702114	PPPU01000025	fig|702114.21.peg.1848	40294	42444	2151	716	Type I secretion system ATPase
Methylomonas koyamae strain Fw12E-Y strain SM2	702114	PPPU01000030	fig|702114.21.peg.2459	32681	34408	1728	575	Type I secretion system ATPase
Methylomonas koyamae strain Fw12E-Y	702114	AP019777	fig|702114.23.peg.3857	3989841	3991568	1728	575	Type I secretion system ATPase
Methylomonas koyamae strain Fw12E-Y	702114	AP019777	fig|702114.23.peg.899	867644	869794	2151	716	Type I secretion system ATPase
Methylomonas sp. LW13	107637	JNLB01000004	fig|107637.3.peg.1582	164224	164829	606	201	Nitric-oxide reductase subunit C (EC 1.7.99.7)
Methylomonas sp. LW13	107637	JNLB01000004	fig|107637.3.peg.1583	164830	166335	1506	501	Nitric-oxide reductase subunit B (EC 1.7.99.7)
Methylovulum miyakonense HT12	1.07885e+06	AQZU01000003	fig|1078846.3.peg.2290	2204430	2205947	1518	505	Nitric-oxide reductase subunit B (EC 1.7.99.7)
Methylovulum miyakonense HT12	1.07885e+06	AQZU01000003	fig|1078846.3.peg.2291	2205950	2206546	597	198	Nitric-oxide reductase subunit C (EC 1.7.99.7)
Methylobacter luteus IMV-B-3098	1.09555e+06	ATYJ01000001	fig|1095552.3.peg.1184	1267149	1268666	1518	505	Nitric-oxide reductase subunit B (EC 1.7.99.7)	GO:0016966|nitric oxide reductase activity
Methylobacter luteus IMV-B-3098	1.09555e+06	ATYJ01000001	fig|1095552.3.peg.1185	1268669	1269265	597	198	Nitric-oxide reductase subunit C (EC 1.7.99.7)	GO:0016966|nitric oxide reductase activity
Methylomonas sp. MK1	1.13155e+06	AQOV01000001	fig|1131552.3.peg.1127	1215256	1215861	606	201	Nitric-oxide reductase subunit C (EC 1.7.99.7)	GO:0016966|nitric oxide reductase activity
Methylomonas sp. MK1	1.13155e+06	AQOV01000001	fig|1131552.3.peg.1128	1215862	1217367	1506	501	Nitric-oxide reductase subunit B (EC 1.7.99.7)	GO:0016966|nitric oxide reductase activity
Methylomonas sp. 11b	1.16817e+06	AZXK01000002	fig|1168169.3.peg.4921	4033922	4035427	1506	501	Nitric-oxide reductase subunit B (EC 1.7.99.7)	GO:0016966|nitric oxide reductase activity
Methylomonas sp. 11b	1.16817e+06	AZXK01000002	fig|1168169.3.peg.4922	4035428	4036033	606	201	Nitric-oxide reductase subunit C (EC 1.7.99.7)	GO:0016966|nitric oxide reductase activity
Methylomonas koyamae JCM 16701	1.29426e+06	BBCK01000029	fig|1294261.13.peg.2477	18183	18602	420	139	Nitric-oxide reductase subunit C (EC 1.7.99.7)
Methylomonas koyamae JCM 16701	1.29426e+06	BBCK01000029	fig|1294261.13.peg.2478	18599	18784	186	61	Nitric-oxide reductase subunit C (EC 1.7.99.7)
Methylomonas koyamae JCM 16701	1.29426e+06	BBCK01000029	fig|1294261.13.peg.2479	18789	20294	1506	501	Nitric-oxide reductase subunit B (EC 1.7.99.7)
Methylogaea oryzae strain E10	1.29538e+06	AP019782	fig|1295382.3.peg.757	774544	775995	1452	483	Nitric-oxide reductase subunit B (EC 1.7.99.7)
Methylogaea oryzae strain E10	1.29538e+06	AP019782	fig|1295382.3.peg.758	775998	776594	597	198	Nitric-oxide reductase subunit C (EC 1.7.99.7)
Methyloterricola oryzae strain 73a	1.49505e+06	JYNS01000024	fig|1495050.5.peg.4120	19652	20257	606	201	Nitric-oxide reductase subunit C (EC 1.7.99.7)
Methyloterricola oryzae strain 73a	1.49505e+06	JYNS01000024	fig|1495050.5.peg.4121	20254	21741	1488	495	Nitric-oxide reductase subunit B (EC 1.7.99.7)
Methylobacter sp. BBA5.1	1.49506e+06	JQKS01000011	fig|1495064.3.peg.1790	4964	6493	1530	509	Nitric-oxide reductase subunit B (EC 1.7.99.7)
Methylobacter sp. BBA5.1	1.49506e+06	JQKS01000011	fig|1495064.3.peg.1791	6496	7092	597	198	Nitric-oxide reductase subunit C (EC 1.7.99.7)
Methylocaldum sp. 175 strain 175	1.5281e+06	FXAM01000001	fig|1528100.4.peg.3382	2772492	2773088	597	198	Nitric-oxide reductase subunit B (EC 1.7.99.7)
Methylomonas denitrificans FJG1	1.53855e+06	JTDD01000028	fig|1538553.4.peg.1621	22552	22872	321	106	Nitric-oxide reductase subunit B (EC 1.7.99.7)
Methylomonas denitrificans FJG1	1.53855e+06	JTDD01000028	fig|1538553.4.peg.1622	22950	24056	1107	368	Nitric-oxide reductase subunit B (EC 1.7.99.7)
Methylomonas denitrificans FJG1	1.53855e+06	JTDD01000028	fig|1538553.4.peg.1623	24057	24245	189	62	Nitric-oxide reductase subunit C (EC 1.7.99.7)
Methylomonas denitrificans FJG1	1.53855e+06	JTDD01000028	fig|1538553.4.peg.1624	24242	24661	420	139	Nitric-oxide reductase subunit C (EC 1.7.99.7)
Methylomonas sp. Kb3	1.61154e+06	PIZT01000006	fig|1611544.3.peg.4419	126593	128098	1506	501	Nitric-oxide reductase subunit B (EC 1.7.99.7)
Methylomonas sp. Kb3	1.61154e+06	PIZT01000006	fig|1611544.3.peg.4420	128099	128704	606	201	Nitric-oxide reductase subunit C (EC 1.7.99.7)
Methylomonas sp. DH-1	1.7272e+06	CP014360	fig|1727196.4.peg.2775	2832016	2832618	603	200	Nitric-oxide reductase subunit C (EC 1.7.99.7)
Methylomonas sp. DH-1	1.7272e+06	CP014360	fig|1727196.4.peg.2776	2832623	2834122	1500	499	Nitric-oxide reductase subunit B (EC 1.7.99.7)
Methylomagnum ishizawai strain RS11D-Pr	1.76099e+06	AP019783	fig|1760988.4.peg.2653	2740368	2740970	603	200	Nitric-oxide reductase subunit C (EC 1.7.99.7)
Methylomagnum ishizawai strain RS11D-Pr	1.76099e+06	AP019783	fig|1760988.4.peg.2654	2740967	2742484	1518	505	Nitric-oxide reductase subunit B (EC 1.7.99.7)
Methylomonas sp. ZR1	1.79707e+06	RCST01000001	fig|1797072.3.peg.2057	2141050	2141655	606	201	Nitric-oxide reductase subunit C (EC 1.7.99.7)
Methylomonas sp. ZR1	1.79707e+06	RCST01000001	fig|1797072.3.peg.2058	2141656	2143161	1506	501	Nitric-oxide reductase subunit B (EC 1.7.99.7)
Methylomonas sp. EbA	1.85456e+06	JACXSS010000001	fig|1854563.3.peg.1774	1801458	1802963	1506	501	Nitric-oxide reductase subunit B (EC 1.7.99.7)
Methylomonas sp. EbA	1.85456e+06	JACXSS010000001	fig|1854563.3.peg.1775	1802967	1803569	603	200	Nitric-oxide reductase subunit C (EC 1.7.99.7)
Methylomonas sp. EbB	1.85456e+06	JACXST010000003	fig|1854564.3.peg.4926	1156036	1156641	606	201	Nitric-oxide reductase subunit C (EC 1.7.99.7)
Methylomonas sp. EbB	1.85456e+06	JACXST010000003	fig|1854564.3.peg.4927	1156642	1158147	1506	501	Nitric-oxide reductase subunit B (EC 1.7.99.7)
Methylobacter sp. SO_2017_LW4 bin 67	2.05196e+06	JALOCF010000027	fig|2051955.20.peg.755	19442	20038	597	198	Nitric-oxide reductase subunit C (EC 1.7.99.7)
Methylobacter sp. SO_2017_LW4 bin 67	2.05196e+06	JALOCF010000027	fig|2051955.20.peg.756	20041	21558	1518	505	Nitric-oxide reductase subunit B (EC 1.7.99.7)
Methylobacter sp. B4-02	2.05196e+06	JAMJFP010000013	fig|2051955.22.peg.365	28733	30250	1518	505	Nitric-oxide reductase subunit B (EC 1.7.99.7)
Methylobacter sp. B4-02	2.05196e+06	JAMJFP010000013	fig|2051955.22.peg.366	30253	30849	597	198	Nitric-oxide reductase subunit C (EC 1.7.99.7)
Methylococcus capsulatus str. Bath	243234	NC_002977	fig|243233.7.peg.2432	2578847	2580292	1446	481	Nitric-oxide reductase subunit B (EC 1.7.99.7)
Methylococcus capsulatus str. Bath	243234	NC_002977	fig|243233.7.peg.2433	2580295	2580897	603	200	Nitric-oxide reductase subunit C (EC 1.7.99.7)
Methylobacter sp. KRF1	2.49775e+06	RYFG01000018	fig|2497749.3.peg.1388	60776	62293	1518	505	Nitric-oxide reductase subunit B (EC 1.7.99.7)
Methylobacter sp. KRF1	2.49775e+06	RYFG01000018	fig|2497749.3.peg.1389	62296	62892	597	198	Nitric-oxide reductase subunit C (EC 1.7.99.7)
Methylomonas sp. GJ1	2.60898e+06	CP043929	fig|2608981.3.peg.4248	4485359	4485958	600	199	Nitric-oxide reductase subunit C (EC 1.7.99.7)
Methylomonas sp. GJ1	2.60898e+06	CP043929	fig|2608981.3.peg.4249	4485962	4487455	1494	497	Nitric-oxide reductase subunit B (EC 1.7.99.7)
Methylomicrobium alcaliphilum strain 20Z	271065	FO082060	fig|271065.3.peg.1185	1310657	1311253	597	198	Nitric-oxide reductase subunit C (EC 1.7.99.7)	GO:0016966|nitric oxide reductase activity
Methylomicrobium alcaliphilum strain 20Z	271065	FO082060	fig|271065.3.peg.1186	1311256	1312773	1518	505	Nitric-oxide reductase subunit B (EC 1.7.99.7)	GO:0016966|nitric oxide reductase activity
Methylomonas sp. LL1	2.78579e+06	CP064653	fig|2785785.3.peg.2399	2512056	2513564	1509	502	Nitric-oxide reductase subunit B (EC 1.7.99.7)
Methylomonas sp. LL1	2.78579e+06	CP064653	fig|2785785.3.peg.2400	2513568	2514167	600	199	Nitric-oxide reductase subunit C (EC 1.7.99.7)
Methylomicrobium sp. RS1	2.80205e+06	JAERVK010000021	fig|2802053.3.peg.1987	16612	17211	600	199	Nitric-oxide reductase subunit C (EC 1.7.99.7)
Methylomicrobium sp. RS1	2.80205e+06	JAERVK010000021	fig|2802053.3.peg.1988	17214	18707	1494	497	Nitric-oxide reductase subunit B (EC 1.7.99.7)
Methylomonas sp. EFPC1	2.81265e+06	CP070494	fig|2812647.3.peg.2931	2988249	2988854	606	201	Nitric-oxide reductase subunit C (EC 1.7.99.7)
Methylomonas sp. EFPC1	2.81265e+06	CP070494	fig|2812647.3.peg.2932	2988855	2990360	1506	501	Nitric-oxide reductase subunit B (EC 1.7.99.7)
Methylobacter whittenburyi strain ACM 3310	39770.3	JQNS01000007	fig|39770.3.peg.3818	125723	126319	597	198	Nitric-oxide reductase subunit C (EC 1.7.99.7)
Methylobacter whittenburyi strain ACM 3310	39770.3	JQNS01000007	fig|39770.3.peg.3819	126322	127851	1530	509	Nitric-oxide reductase subunit B (EC 1.7.99.7)
Methylobacter whittenburyi strain UCM-B-3033	39770.6	JQNS01000007	fig|39770.6.peg.4034	125723	126319	597	198	Nitric-oxide reductase subunit C (EC 1.7.99.7)
Methylobacter whittenburyi strain UCM-B-3033	39770.6	JQNS01000007	fig|39770.6.peg.4035	126322	127851	1530	509	Nitric-oxide reductase subunit B (EC 1.7.99.7)
Methylomicrobium agile strain ATCC 35068	39774.3	JPOJ01000001	fig|39774.3.peg.2285	2367984	2369477	1494	497	Nitric-oxide reductase subunit B (EC 1.7.99.7)
Methylomicrobium agile strain ATCC 35068	39774.3	JPOJ01000001	fig|39774.3.peg.2286	2369480	2370079	600	199	Nitric-oxide reductase subunit C (EC 1.7.99.7)
Methylomonas LK_5	416.38	416.38.con.0033	fig|416.38.peg.3377	39022	39627	606	201	Nitric-oxide reductase subunit C (EC 1.7.99.7)
Methylomonas LK_5	416.38	416.38.con.0033	fig|416.38.peg.3378	39628	41142	1515	504	Nitric-oxide reductase subunit B (EC 1.7.99.7)
Methylomonas LK_3	416.39	416.39.con.0016	fig|416.39.peg.1934	30924	32429	1506	501	Nitric-oxide reductase subunit B (EC 1.7.99.7)
Methylomonas LK_3	416.39	416.39.con.0016	fig|416.39.peg.1935	32430	33032	603	200	Nitric-oxide reductase subunit C (EC 1.7.99.7)
Methylomonas LK_4	416.4	416.40.con.0012	fig|416.40.peg.3181	20648	22162	1515	504	Nitric-oxide reductase subunit B (EC 1.7.99.7)
Methylomonas LK_4	416.4	416.40.con.0012	fig|416.40.peg.3182	22163	22768	606	201	Nitric-oxide reductase subunit C (EC 1.7.99.7)
Methylomonas sp. SO_2017_LW3 bin 4	418.2	JALOBS010000014	fig|418.20.peg.2035	38029	39534	1506	501	Nitric-oxide reductase subunit B (EC 1.7.99.7)
Methylomonas sp. SO_2017_LW3 bin 4	418.2	JALOBS010000014	fig|418.20.peg.2036	39538	40137	600	199	Nitric-oxide reductase subunit C (EC 1.7.99.7)
Methylomonas sp. strain FW.007	418.6	PERU01000007	fig|418.6.peg.1423	84607	86121	1515	504	Nitric-oxide reductase subunit B (EC 1.7.99.7)
Methylomonas sp. strain FW.007	418.6	PERU01000007	fig|418.6.peg.1424	86121	86723	603	200	Nitric-oxide reductase subunit C (EC 1.7.99.7)
Methylomonas sp. strain FW.007	418.6	PERU01000034	fig|418.6.peg.3341	16295	17782	1488	495	Nitric-oxide reductase subunit B (EC 1.7.99.7)
Methylomonas sp. strain FW.007	418.6	PERU01000034	fig|418.6.peg.3342	17785	18381	597	198	Nitric-oxide reductase subunit C (EC 1.7.99.7)
Methylomonas methanica strain R-45363	421.17	LUUG01000070	fig|421.17.peg.2398	21367	22872	1506	501	Nitric-oxide reductase subunit B (EC 1.7.99.7)
Methylomonas methanica strain R-45363	421.17	LUUG01000070	fig|421.17.peg.2399	22873	23478	606	201	Nitric-oxide reductase subunit C (EC 1.7.99.7)
Methylomonas methanica strain NCIMB 11130	421.18	LUUF01000052	fig|421.18.peg.1641	22519	24024	1506	501	Nitric-oxide reductase subunit B (EC 1.7.99.7)
Methylomonas methanica strain NCIMB 11130	421.18	LUUF01000052	fig|421.18.peg.1642	24025	24630	606	201	Nitric-oxide reductase subunit C (EC 1.7.99.7)
Methylomonas methanica strain R-45371	421.19	LUUH01000079	fig|421.19.peg.4135	58797	59402	606	201	Nitric-oxide reductase subunit C (EC 1.7.99.7)
Methylomonas methanica strain R-45371	421.19	LUUH01000079	fig|421.19.peg.4136	59403	60908	1506	501	Nitric-oxide reductase subunit B (EC 1.7.99.7)
Methylomonas methanica strain S-1	421.26	SMCN01000009	fig|421.26.peg.2532	173193	173798	606	201	Nitric-oxide reductase subunit C (EC 1.7.99.7)
Methylomonas methanica strain S-1	421.26	SMCN01000009	fig|421.26.peg.2533	173799	175304	1506	501	Nitric-oxide reductase subunit B (EC 1.7.99.7)
Methylobacter marinus A45	674036	ARVS01000008	fig|674036.3.peg.4361	492685	494214	1530	509	Nitric-oxide reductase subunit B (EC 1.7.99.7)	GO:0016966|nitric oxide reductase activity
Methylobacter marinus A45	674036	ARVS01000008	fig|674036.3.peg.4362	494217	494813	597	198	Nitric-oxide reductase subunit C (EC 1.7.99.7)	GO:0016966|nitric oxide reductase activity
Methylomicrobium buryatense 5G	675511	AOTL01000013	fig|675511.3.peg.2051	95153	96670	1518	505	Nitric-oxide reductase subunit B (EC 1.7.99.7)	GO:0016966|nitric oxide reductase activity
Methylomicrobium buryatense 5G	675511	AOTL01000013	fig|675511.3.peg.2052	96673	97269	597	198	Nitric-oxide reductase subunit C (EC 1.7.99.7)	GO:0016966|nitric oxide reductase activity
Methylomicrobium album BG8	686341	CM001475	fig|686340.8.peg.872	911990	913483	1494	497	Nitric-oxide reductase subunit B (EC 1.7.99.7)
Methylomicrobium album BG8	686341	CM001475	fig|686340.8.peg.873	913486	914085	600	199	Nitric-oxide reductase subunit C (EC 1.7.99.7)
Methylomonas koyamae strain R-49807	702114	LUUL01000073	fig|702114.14.peg.2446	19236	20735	1500	499	Nitric-oxide reductase subunit B (EC 1.7.99.7)
Methylomonas koyamae strain R-49807	702114	LUUL01000073	fig|702114.14.peg.2447	20740	21342	603	200	Nitric-oxide reductase subunit C (EC 1.7.99.7)
Methylomonas koyamae strain R-45378	702114	LUUJ01000101	fig|702114.15.peg.3413	99348	99950	603	200	Nitric-oxide reductase subunit C (EC 1.7.99.7)
Methylomonas koyamae strain R-45378	702114	LUUJ01000101	fig|702114.15.peg.3414	99955	101454	1500	499	Nitric-oxide reductase subunit B (EC 1.7.99.7)
Methylomonas koyamae strain LM6	702114	CP023669	fig|702114.17.peg.2827	2912293	2912895	603	200	Nitric-oxide reductase subunit C (EC 1.7.99.7)
Methylomonas koyamae strain LM6	702114	CP023669	fig|702114.17.peg.2828	2912900	2914399	1500	499	Nitric-oxide reductase subunit B (EC 1.7.99.7)
Methylomonas koyamae strain Fw12E-Y strain SM2	702114	PPPU01000022	fig|702114.21.peg.1750	159877	161376	1500	499	Nitric-oxide reductase subunit B (EC 1.7.99.7)
Methylomonas koyamae strain Fw12E-Y strain SM2	702114	PPPU01000022	fig|702114.21.peg.1751	161381	161983	603	200	Nitric-oxide reductase subunit C (EC 1.7.99.7)
Methylomonas koyamae strain Fw12E-Y	702114	AP019777	fig|702114.23.peg.2646	2734483	2735085	603	200	Nitric-oxide reductase subunit C (EC 1.7.99.7)
Methylomonas koyamae strain Fw12E-Y	702114	AP019777	fig|702114.23.peg.2647	2735090	2736589	1500	499	Nitric-oxide reductase subunit B (EC 1.7.99.7)
Methylomonas methanica MC09	857087	NC_015572	fig|857087.3.peg.2552	2760233	2760829	597	198	Nitric-oxide reductase subunit C (EC 1.7.99.7)	GO:0016966|nitric oxide reductase activity
Methylomonas methanica MC09	857087	NC_015572	fig|857087.3.peg.2553	2760832	2762319	1488	495	Nitric-oxide reductase subunit B (EC 1.7.99.7)	GO:0016966|nitric oxide reductase activity
Methylomonas lenta strain R-45370	980561	LUUI01000096	fig|980561.3.peg.2074	49541	51046	1506	501	Nitric-oxide reductase subunit B (EC 1.7.99.7)
Methylomonas lenta strain R-45370	980561	LUUI01000096	fig|980561.3.peg.2075	51051	51650	600	199	Nitric-oxide reductase subunit C (EC 1.7.99.7)
Methylomonas sp. LW13	107637	JNLB01000023	fig|107637.3.peg.4478	52735	54315	1581	526	Nitrite reductase (EC 1.7.2.1)	GO:0050421|nitrite reductase (NO-forming) activity
Methylovulum miyakonense HT12	1.07885e+06	AQZU01000003	fig|1078846.3.peg.1238	1168083	1169687	1605	534	Nitrite reductase (EC 1.7.2.1)	GO:0050421|nitrite reductase (NO-forming) activity
Methylobacter luteus IMV-B-3098	1.09555e+06	ATYJ01000013	fig|1095552.3.peg.4353	280852	282438	1587	528	Nitrite reductase (EC 1.7.2.1)	GO:0050421|nitrite reductase (NO-forming) activity
Methylomonas sp. MK1	1.13155e+06	AQOV01000001	fig|1131552.3.peg.2171	2305503	2307083	1581	526	Nitrite reductase (EC 1.7.2.1)	GO:0050421|nitrite reductase (NO-forming) activity
Methylomonas sp. 11b	1.16817e+06	AZXK01000002	fig|1168169.3.peg.3887	2905356	2906936	1581	526	Nitrite reductase (EC 1.7.2.1)	GO:0050421|nitrite reductase (NO-forming) activity
Methylomonas koyamae JCM 16701	1.29426e+06	BBCK01000023	fig|1294261.13.peg.2159	36267	37847	1581	526	Nitrite reductase (EC 1.7.2.1)	GO:0050421|nitrite reductase (NO-forming) activity
Methylobacter tundripaludum 21/22	1.40845e+06	JMLA01000001	fig|1408450.3.peg.1993	2093331	2094515	1185	394	Copper-containing nitrite reductase (EC 1.7.2.1)	GO:0050421|nitrite reductase (NO-forming) activity
Methylobacter tundripaludum 21/22	1.40845e+06	JMLA01000001	fig|1408450.3.peg.3	2923	4503	1581	526	Nitrite reductase (EC 1.7.2.1)	GO:0050421|nitrite reductase (NO-forming) activity
Methylobacter tundripaludum 31/32	1.40845e+06	JPOH01000001	fig|1408451.3.peg.954	1073674	1075254	1581	526	Nitrite reductase (EC 1.7.2.1)	GO:0050421|nitrite reductase (NO-forming) activity
Methylobacter tundripaludum 31/32	1.40845e+06	JPOH01000001	fig|1408451.3.peg.3230	3410189	3411394	1206	401	Copper-containing nitrite reductase (EC 1.7.2.1)	GO:0050421|nitrite reductase (NO-forming) activity
Methylobacter sp. BBA5.1	1.49506e+06	JQKS01000039	fig|1495064.3.peg.4279	21164	22750	1587	528	Nitrite reductase (EC 1.7.2.1)	GO:0050421|nitrite reductase (NO-forming) activity
Methylocaldum sp. 175 strain 175	1.5281e+06	FXAM01000001	fig|1528100.4.peg.2190	1466791	1468374	1584	527	Nitrite reductase (EC 1.7.2.1)	GO:0050421|nitrite reductase (NO-forming) activity
Methylomonas denitrificans FJG1	1.53855e+06	JTDD01000043	fig|1538553.4.peg.2620	91755	92351	597	198	Nitrite reductase (EC 1.7.2.1)	GO:0050421|nitrite reductase (NO-forming) activity
Methylomonas denitrificans FJG1	1.53855e+06	JTDD01000043	fig|1538553.4.peg.2621	92393	93334	942	313	Nitrite reductase (EC 1.7.2.1)	GO:0050421|nitrite reductase (NO-forming) activity
Methylomonas denitrificans FJG1	1.53855e+06	JTDD01000087	fig|1538553.4.peg.4049	1294	2352	1059	352	Copper-containing nitrite reductase (EC 1.7.2.1)	GO:0050421|nitrite reductase (NO-forming) activity
Methylomonas sp. Kb3	1.61154e+06	PIZT01000012	fig|1611544.3.peg.1200	52633	54213	1581	526	Nitrite reductase (EC 1.7.2.1)	GO:0050421|nitrite reductase (NO-forming) activity
Methylomonas sp. DH-1	1.7272e+06	CP014360	fig|1727196.4.peg.782	779275	780855	1581	526	Nitrite reductase (EC 1.7.2.1)	GO:0050421|nitrite reductase (NO-forming) activity
Methylobacter tundripaludum Tobar13m-G39	173365	JAIPFK010000012	fig|173365.10.peg.1323	61548	63125	1578	525	Nitrite reductase (EC 1.7.2.1)	GO:0050421|nitrite reductase (NO-forming) activity
Methylobacter tundripaludum Tobar13m-G39	173365	JAIPFK010000042	fig|173365.10.peg.1050	8370	9614	1245	414	Copper-containing nitrite reductase (EC 1.7.2.1)	GO:0050421|nitrite reductase (NO-forming) activity
Methylobacter tundripaludum SO_2017_LW4 bin 69	173365	JALOCG010000010	fig|173365.13.peg.3536	12453	14030	1578	525	Nitrite reductase (EC 1.7.2.1)	GO:0050421|nitrite reductase (NO-forming) activity
Methylobacter tundripaludum SO_2017_LW4 bin 69	173365	JALOCG010000018	fig|173365.13.peg.348	9349	10593	1245	414	Copper-containing nitrite reductase (EC 1.7.2.1)	GO:0050421|nitrite reductase (NO-forming) activity
Methylobacter tundripaludum strain OWC-G53F	173366	PTIY01000004	fig|173365.5.peg.1511	306171	307415	1245	414	Copper-containing nitrite reductase (EC 1.7.2.1)	GO:0050421|nitrite reductase (NO-forming) activity
Methylobacter tundripaludum strain OWC-G53F	173366	PTIY01000013	fig|173365.5.peg.3235	98470	100047	1578	525	Nitrite reductase (EC 1.7.2.1)	GO:0050421|nitrite reductase (NO-forming) activity
Methylobacter tundripaludum strain OWC-DMM	173366	PTIZ01000005	fig|173365.6.peg.2482	302083	303282	1200	399	Copper-containing nitrite reductase (EC 1.7.2.1)	GO:0050421|nitrite reductase (NO-forming) activity
Methylobacter tundripaludum strain OWC-DMM	173366	PTIZ01000016	fig|173365.6.peg.4237	1870	3450	1581	526	Nitrite reductase (EC 1.7.2.1)	GO:0050421|nitrite reductase (NO-forming) activity
Methylomagnum ishizawai strain RS11D-Pr	1.76099e+06	AP019783	fig|1760988.4.peg.1330	1343482	1345065	1584	527	Nitrite reductase (EC 1.7.2.1)	GO:0050421|nitrite reductase (NO-forming) activity
Methylomonas sp. ZR1	1.79707e+06	RCST01000001	fig|1797072.3.peg.4995	5108805	5110385	1581	526	Nitrite reductase (EC 1.7.2.1)	GO:0050421|nitrite reductase (NO-forming) activity
Methylomonas sp. EbA	1.85456e+06	JACXSS010000001	fig|1854563.3.peg.667	649132	650712	1581	526	Nitrite reductase (EC 1.7.2.1)	GO:0050421|nitrite reductase (NO-forming) activity
Methylomonas sp. EbB	1.85456e+06	JACXST010000002	fig|1854564.3.peg.3328	1336500	1338080	1581	526	Nitrite reductase (EC 1.7.2.1)	GO:0050421|nitrite reductase (NO-forming) activity
Methylomonas sp. LWB	1.90585e+06	MKMC01000010	fig|1905845.3.peg.1145	31211	32794	1584	527	Nitrite reductase (EC 1.7.2.1)	GO:0050421|nitrite reductase (NO-forming) activity
Methylobacter sp. UBA2091	1.94686e+06	DCZF01000064	fig|1946861.3.peg.2375	22495	23694	1200	399	Copper-containing nitrite reductase (EC 1.7.2.1)	GO:0050421|nitrite reductase (NO-forming) activity
Methylobacter sp. UBA2091	1.94686e+06	DCZF01000095	fig|1946861.3.peg.3082	49787	51367	1581	526	Nitrite reductase (EC 1.7.2.1)	GO:0050421|nitrite reductase (NO-forming) activity
Methylobacter sp. UBA6696	1.94686e+06	DKJI01000049	fig|1946862.3.peg.1912	2412	3992	1581	526	Nitrite reductase (EC 1.7.2.1)	GO:0050421|nitrite reductase (NO-forming) activity
Methylobacter sp. UBA6696	1.94686e+06	DKJI01000100	fig|1946862.3.peg.2401	44162	45361	1200	399	Copper-containing nitrite reductase (EC 1.7.2.1)	GO:0050421|nitrite reductase (NO-forming) activity
Methylobacter sp. UBA6712	1.94686e+06	DKIS01000080	fig|1946864.3.peg.4045	2727	4307	1581	526	Nitrite reductase (EC 1.7.2.1)	GO:0050421|nitrite reductase (NO-forming) activity
Methylobacter sp. UBA6712	1.94686e+06	DKIS01000091	fig|1946864.3.peg.1735	54487	55731	1245	414	Copper-containing nitrite reductase (EC 1.7.2.1)	GO:0050421|nitrite reductase (NO-forming) activity
Methylobacter sp. strain FW305_bin.9	2.05196e+06	SCTW01000078	fig|2051955.10.peg.1782	44732	45931	1200	399	Copper-containing nitrite reductase (EC 1.7.2.1)	GO:0050421|nitrite reductase (NO-forming) activity
Methylobacter sp. strain FW305_bin.9	2.05196e+06	SCTW01000120	fig|2051955.10.peg.2926	29717	31297	1581	526	Nitrite reductase (EC 1.7.2.1)	GO:0050421|nitrite reductase (NO-forming) activity
Methylobacter sp. SO_2017_LW4 bin 67	2.05196e+06	JALOCF010000062	fig|2051955.20.peg.3387	18341	19921	1581	526	Nitrite reductase (EC 1.7.2.1)	GO:0050421|nitrite reductase (NO-forming) activity
Methylobacter sp. SO_2017_GW1 bin 29	2.05196e+06	JALNYY010000079	fig|2051955.21.peg.138	960	2540	1581	526	Nitrite reductase (EC 1.7.2.1)	GO:0050421|nitrite reductase (NO-forming) activity
Methylobacter sp. B4-02	2.05196e+06	JAMJFP010000006	fig|2051955.22.peg.3987	86239	87825	1587	528	Nitrite reductase (EC 1.7.2.1)	GO:0050421|nitrite reductase (NO-forming) activity
Methylobacter sp. strain DP16D_bin.19	2.05196e+06	SCPZ01000093	fig|2051955.9.peg.3146	23424	24611	1188	395	Copper-containing nitrite reductase (EC 1.7.2.1)	GO:0050421|nitrite reductase (NO-forming) activity
Methylobacter sp. strain DP16D_bin.19	2.05196e+06	SCPZ01000125	fig|2051955.9.peg.178	77395	78975	1581	526	Nitrite reductase (EC 1.7.2.1)	GO:0050421|nitrite reductase (NO-forming) activity
Methylobacter sp. KRF1	2.49775e+06	RYFG01000066	fig|2497749.3.peg.4128	10838	12472	1635	544	Nitrite reductase (EC 1.7.2.1)	GO:0050421|nitrite reductase (NO-forming) activity
Methylomonas sp. GJ1	2.60898e+06	CP043929	fig|2608981.3.peg.690	708014	709594	1581	526	Nitrite reductase (EC 1.7.2.1)	GO:0050421|nitrite reductase (NO-forming) activity
Methylomonas sp. LL1	2.78579e+06	CP064653	fig|2785785.3.peg.3107	3239305	3240888	1584	527	Nitrite reductase (EC 1.7.2.1)	GO:0050421|nitrite reductase (NO-forming) activity
Methylomicrobium sp. RS1	2.80205e+06	JAERVK010000017	fig|2802053.3.peg.1219	92782	94365	1584	527	Nitrite reductase (EC 1.7.2.1)	GO:0050421|nitrite reductase (NO-forming) activity
Methylomonas sp. EFPC1	2.81265e+06	CP070494	fig|2812647.3.peg.3840	3973391	3974971	1581	526	Nitrite reductase (EC 1.7.2.1)	GO:0050421|nitrite reductase (NO-forming) activity
Methylobacter whittenburyi strain ACM 3310	39770.3	JQNS01000002	fig|39770.3.peg.476	226587	228173	1587	528	Nitrite reductase (EC 1.7.2.1)	GO:0050421|nitrite reductase (NO-forming) activity
Methylobacter whittenburyi strain UCM-B-3033	39770.6	JQNS01000002	fig|39770.6.peg.499	226587	228173	1587	528	Nitrite reductase (EC 1.7.2.1)	GO:0050421|nitrite reductase (NO-forming) activity
Methylomicrobium agile strain ATCC 35068	39774.3	JPOJ01000001	fig|39774.3.peg.3757	3971301	3972884	1584	527	Nitrite reductase (EC 1.7.2.1)	GO:0050421|nitrite reductase (NO-forming) activity
Methylomonas LK_5	416.38	416.38.con.0003	fig|416.38.peg.684	106146	107204	1059	352	Copper-containing nitrite reductase (EC 1.7.2.1)	GO:0050421|nitrite reductase (NO-forming) activity
Methylomonas LK_5	416.38	416.38.con.0016	fig|416.38.peg.2249	15411	16913	1503	500	Nitrite reductase (EC 1.7.2.1)	GO:0050421|nitrite reductase (NO-forming) activity
Methylomonas LK_3	416.39	416.39.con.0015	fig|416.39.peg.1869	59043	60623	1581	526	Nitrite reductase (EC 1.7.2.1)	GO:0050421|nitrite reductase (NO-forming) activity
Methylomonas LK_3	416.39	416.39.con.0019	fig|416.39.peg.2203	55476	56537	1062	353	Copper-containing nitrite reductase (EC 1.7.2.1)	GO:0050421|nitrite reductase (NO-forming) activity
Methylomonas LK_4	416.4	416.40.con.0005	fig|416.40.peg.2174	81244	82746	1503	500	Nitrite reductase (EC 1.7.2.1)	GO:0050421|nitrite reductase (NO-forming) activity
Methylomonas sp. SO_2017_LW3 bin 4	418.2	JALOBS010000002	fig|418.20.peg.3852	190604	192184	1581	526	Nitrite reductase (EC 1.7.2.1)	GO:0050421|nitrite reductase (NO-forming) activity
Methylomonas sp. strain FW.007	418.6	PERU01000013	fig|418.6.peg.2070	88484	90067	1584	527	Nitrite reductase (EC 1.7.2.1)	GO:0050421|nitrite reductase (NO-forming) activity
Methylomonas methanica strain R-45363	421.17	LUUG01000103	fig|421.17.peg.4165	10141	11721	1581	526	Nitrite reductase (EC 1.7.2.1)	GO:0050421|nitrite reductase (NO-forming) activity
Methylomonas methanica strain NCIMB 11130	421.18	LUUF01000043	fig|421.18.peg.1202	233248	234828	1581	526	Nitrite reductase (EC 1.7.2.1)	GO:0050421|nitrite reductase (NO-forming) activity
Methylomonas methanica strain NCIMB 11130	421.18	LUUF01000063	fig|421.18.peg.2370	67444	68502	1059	352	Copper-containing nitrite reductase (EC 1.7.2.1)	GO:0050421|nitrite reductase (NO-forming) activity
Methylomonas methanica strain R-45371	421.19	LUUH01000024	fig|421.19.peg.695	77596	78657	1062	353	Copper-containing nitrite reductase (EC 1.7.2.1)	GO:0050421|nitrite reductase (NO-forming) activity
Methylomonas methanica strain R-45371	421.19	LUUH01000069	fig|421.19.peg.3518	10084	11664	1581	526	Nitrite reductase (EC 1.7.2.1)	GO:0050421|nitrite reductase (NO-forming) activity
Methylomonas methanica strain S-1	421.26	SMCN01000007	fig|421.26.peg.1897	10170	11750	1581	526	Nitrite reductase (EC 1.7.2.1)	GO:0050421|nitrite reductase (NO-forming) activity
Methylomonas methanica strain S-1	421.26	SMCN01000019	fig|421.26.peg.3558	14784	15842	1059	352	Copper-containing nitrite reductase (EC 1.7.2.1)	GO:0050421|nitrite reductase (NO-forming) activity
Methylobacter LK_1	429.13	429.13.con.0012	fig|429.13.peg.2162	19983	21230	1248	415	Copper-containing nitrite reductase (EC 1.7.2.1)	GO:0050421|nitrite reductase (NO-forming) activity
Methylobacter LK_1	429.13	429.13.con.0037	fig|429.13.peg.3460	1583	3163	1581	526	Nitrite reductase (EC 1.7.2.1)	GO:0050421|nitrite reductase (NO-forming) activity
Methylobacter marinus A45	674036	ARVS01000004	fig|674036.3.peg.2604	265037	266623	1587	528	Nitrite reductase (EC 1.7.2.1)	GO:0050421|nitrite reductase (NO-forming) activity
Methylomicrobium album BG8	686341	CM001475	fig|686340.8.peg.2491	2556596	2558179	1584	527	Nitrite reductase (EC 1.7.2.1)	GO:0050421|nitrite reductase (NO-forming) activity
Methylobacter tundripaludum SV96	697282	NZ_AEGW01000005	fig|697282.3.peg.2139	327589	328995	1407	468	Nitrite reductase (EC 1.7.2.1)	GO:0050421|nitrite reductase (NO-forming) activity
Methylomonas koyamae strain R-45383	702114	LUUK01000205	fig|702114.13.peg.4650	34098	35681	1584	527	Nitrite reductase (EC 1.7.2.1)	GO:0050421|nitrite reductase (NO-forming) activity
Methylomonas koyamae strain R-49807	702114	LUUL01000055	fig|702114.14.peg.1261	144970	146550	1581	526	Nitrite reductase (EC 1.7.2.1)	GO:0050421|nitrite reductase (NO-forming) activity
Methylomonas koyamae strain R-45378	702114	LUUJ01000129	fig|702114.15.peg.4717	42465	44045	1581	526	Nitrite reductase (EC 1.7.2.1)	GO:0050421|nitrite reductase (NO-forming) activity
Methylomonas koyamae strain LM6	702114	CP023669	fig|702114.17.peg.808	816861	818441	1581	526	Nitrite reductase (EC 1.7.2.1)	GO:0050421|nitrite reductase (NO-forming) activity
Methylomonas koyamae strain Fw12E-Y strain SM2	702114	PPPU01000017	fig|702114.21.peg.1100	9822	11399	1578	525	Nitrite reductase (EC 1.7.2.1)	GO:0050421|nitrite reductase (NO-forming) activity
Methylomonas koyamae strain Fw12E-Y	702114	AP019777	fig|702114.23.peg.789	758237	759817	1581	526	Nitrite reductase (EC 1.7.2.1)	GO:0050421|nitrite reductase (NO-forming) activity
Methylomonas methanica MC09	857087	NC_015572	fig|857087.3.peg.4086	4432517	4434097	1581	526	Nitrite reductase (EC 1.7.2.1)	GO:0050421|nitrite reductase (NO-forming) activity
Methylomonas lenta strain R-45370	980561	LUUI01000095	fig|980561.3.peg.1958	128922	130502	1581	526	Nitrite reductase (EC 1.7.2.1)	GO:0050421|nitrite reductase (NO-forming) activity
Methylogaea oryzae strain E10	1.29538e+06	AP019782	fig|1295382.3.peg.1563	1671221	1671901	681	226	Respiratory nitrate reductase gamma chain (EC 1.7.99.4)	GO:0008940|nitrate reductase activity
Methylogaea oryzae strain E10	1.29538e+06	AP019782	fig|1295382.3.peg.1564	1671898	1672674	777	258	Respiratory nitrate reductase delta chain (EC 1.7.99.4)	GO:0008940|nitrate reductase activity
Methylogaea oryzae strain E10	1.29538e+06	AP019782	fig|1295382.3.peg.1565	1672671	1674212	1542	513	Respiratory nitrate reductase beta chain (EC 1.7.99.4)	GO:0008940|nitrate reductase activity
Methylogaea oryzae strain E10	1.29538e+06	AP019782	fig|1295382.3.peg.1566	1674209	1677955	3747	1248	Respiratory nitrate reductase alpha chain (EC 1.7.99.4)	GO:0008940|nitrate reductase activity
Methylobacter tundripaludum 21/22	1.40845e+06	JMLA01000001	fig|1408450.3.peg.1989	2085971	2089711	3741	1246	Respiratory nitrate reductase alpha chain (EC 1.7.99.4)	GO:0008940|nitrate reductase activity
Methylobacter tundripaludum 21/22	1.40845e+06	JMLA01000001	fig|1408450.3.peg.1990	2089711	2091297	1587	528	Respiratory nitrate reductase beta chain (EC 1.7.99.4)	GO:0008940|nitrate reductase activity
Methylobacter tundripaludum 21/22	1.40845e+06	JMLA01000001	fig|1408450.3.peg.1991	2091570	2092280	711	236	Respiratory nitrate reductase delta chain (EC 1.7.99.4)	GO:0008940|nitrate reductase activity
Methylobacter tundripaludum 21/22	1.40845e+06	JMLA01000001	fig|1408450.3.peg.1992	2092293	2092970	678	225	Respiratory nitrate reductase gamma chain (EC 1.7.99.4)	GO:0008940|nitrate reductase activity
Methylobacter tundripaludum 31/32	1.40845e+06	JPOH01000001	fig|1408451.3.peg.3225	3403075	3406815	3741	1246	Respiratory nitrate reductase alpha chain (EC 1.7.99.4)	GO:0008940|nitrate reductase activity
Methylobacter tundripaludum 31/32	1.40845e+06	JPOH01000001	fig|1408451.3.peg.3226	3406815	3408401	1587	528	Respiratory nitrate reductase beta chain (EC 1.7.99.4)	GO:0008940|nitrate reductase activity
Methylobacter tundripaludum 31/32	1.40845e+06	JPOH01000001	fig|1408451.3.peg.3227	3408674	3409384	711	236	Respiratory nitrate reductase delta chain (EC 1.7.99.4)	GO:0008940|nitrate reductase activity
Methylobacter tundripaludum 31/32	1.40845e+06	JPOH01000001	fig|1408451.3.peg.3228	3409397	3410074	678	225	Respiratory nitrate reductase gamma chain (EC 1.7.99.4)	GO:0008940|nitrate reductase activity
Methylomonas denitrificans FJG1	1.53855e+06	JTDD01000087	fig|1538553.4.peg.4048	571	1248	678	225	Respiratory nitrate reductase gamma chain (EC 1.7.99.4)	GO:0008940|nitrate reductase activity
Methylomonas denitrificans FJG1	1.53855e+06	JTDD01000087	fig|1538553.4.peg.4047	9	566	558	185	Respiratory nitrate reductase delta chain (EC 1.7.99.4)	GO:0008940|nitrate reductase activity
Methylomonas denitrificans FJG1	1.53855e+06	JTDD01000102	fig|1538553.4.peg.4396	11682	12683	1002	333	Respiratory nitrate reductase beta chain (EC 1.7.99.4)	GO:0008940|nitrate reductase activity
Methylomonas denitrificans FJG1	1.53855e+06	JTDD01000102	fig|1538553.4.peg.4397	12712	13086	375	124	Respiratory nitrate reductase beta chain (EC 1.7.99.4)	GO:0008940|nitrate reductase activity
Methylomonas denitrificans FJG1	1.53855e+06	JTDD01000102	fig|1538553.4.peg.4395	7972	11682	3711	1236	Respiratory nitrate reductase alpha chain (EC 1.7.99.4)	GO:0008940|nitrate reductase activity
Methylobacter tundripaludum Tobar13m-G39	173365	JAIPFK010000042	fig|173365.10.peg.1053	10414	11124	711	236	Respiratory nitrate reductase delta chain (EC 1.7.99.4)	GO:0008940|nitrate reductase activity
Methylobacter tundripaludum Tobar13m-G39	173365	JAIPFK010000042	fig|173365.10.peg.1054	11552	13159	1608	535	Respiratory nitrate reductase beta chain (EC 1.7.99.4)	GO:0008940|nitrate reductase activity
Methylobacter tundripaludum Tobar13m-G39	173365	JAIPFK010000042	fig|173365.10.peg.1055	13159	16899	3741	1246	Respiratory nitrate reductase alpha chain (EC 1.7.99.4)	GO:0008940|nitrate reductase activity
Methylobacter tundripaludum Tobar13m-G39	173365	JAIPFK010000042	fig|173365.10.peg.1052	9724	10401	678	225	Respiratory nitrate reductase gamma chain (EC 1.7.99.4)	GO:0008940|nitrate reductase activity
Methylobacter tundripaludum SO_2017_LW4 bin 69	173365	JALOCG010000018	fig|173365.13.peg.350	10703	11380	678	225	Respiratory nitrate reductase gamma chain (EC 1.7.99.4)	GO:0008940|nitrate reductase activity
Methylobacter tundripaludum SO_2017_LW4 bin 69	173365	JALOCG010000018	fig|173365.13.peg.351	11393	12097	705	234	Respiratory nitrate reductase delta chain (EC 1.7.99.4)	GO:0008940|nitrate reductase activity
Methylobacter tundripaludum SO_2017_LW4 bin 69	173365	JALOCG010000018	fig|173365.13.peg.352	12217	13803	1587	528	Respiratory nitrate reductase beta chain (EC 1.7.99.4)	GO:0008940|nitrate reductase activity
Methylobacter tundripaludum SO_2017_LW4 bin 69	173365	JALOCG010000018	fig|173365.13.peg.353	13803	17567	3765	1254	Respiratory nitrate reductase alpha chain (EC 1.7.99.4)	GO:0008940|nitrate reductase activity
Methylobacter tundripaludum strain OWC-G53F	173366	PTIY01000004	fig|173365.5.peg.1507	298907	302647	3741	1246	Respiratory nitrate reductase alpha chain (EC 1.7.99.4)	GO:0008940|nitrate reductase activity
Methylobacter tundripaludum strain OWC-G53F	173366	PTIY01000004	fig|173365.5.peg.1508	302647	304233	1587	528	Respiratory nitrate reductase beta chain (EC 1.7.99.4)	GO:0008940|nitrate reductase activity
Methylobacter tundripaludum strain OWC-G53F	173366	PTIY01000004	fig|173365.5.peg.1509	304661	305371	711	236	Respiratory nitrate reductase delta chain (EC 1.7.99.4)	GO:0008940|nitrate reductase activity
Methylobacter tundripaludum strain OWC-G53F	173366	PTIY01000004	fig|173365.5.peg.1510	305384	306061	678	225	Respiratory nitrate reductase gamma chain (EC 1.7.99.4)	GO:0008940|nitrate reductase activity
Methylobacter tundripaludum strain OWC-DMM	173366	PTIZ01000005	fig|173365.6.peg.2483	303415	304092	678	225	Respiratory nitrate reductase gamma chain (EC 1.7.99.4)	GO:0008940|nitrate reductase activity
Methylobacter tundripaludum strain OWC-DMM	173366	PTIZ01000005	fig|173365.6.peg.2484	304106	304816	711	236	Respiratory nitrate reductase delta chain (EC 1.7.99.4)	GO:0008940|nitrate reductase activity
Methylobacter tundripaludum strain OWC-DMM	173366	PTIZ01000005	fig|173365.6.peg.2485	305043	306677	1635	544	Respiratory nitrate reductase beta chain (EC 1.7.99.4)	GO:0008940|nitrate reductase activity
Methylobacter tundripaludum strain OWC-DMM	173366	PTIZ01000005	fig|173365.6.peg.2486	306674	310441	3768	1255	Respiratory nitrate reductase alpha chain (EC 1.7.99.4)	GO:0008940|nitrate reductase activity
Methylobacter sp. UBA2091	1.94686e+06	DCZF01000064	fig|1946861.3.peg.2370	14004	17738	3735	1244	Respiratory nitrate reductase alpha chain (EC 1.7.99.4)	GO:0008940|nitrate reductase activity
Methylobacter sp. UBA2091	1.94686e+06	DCZF01000064	fig|1946861.3.peg.2372	19174	20736	1563	520	Respiratory nitrate reductase beta chain (EC 1.7.99.4)	GO:0008940|nitrate reductase activity
Methylobacter sp. UBA2091	1.94686e+06	DCZF01000064	fig|1946861.3.peg.2373	20999	21709	711	236	Respiratory nitrate reductase delta chain (EC 1.7.99.4)	GO:0008940|nitrate reductase activity
Methylobacter sp. UBA2091	1.94686e+06	DCZF01000064	fig|1946861.3.peg.2374	21723	22400	678	225	Respiratory nitrate reductase gamma chain (EC 1.7.99.4)	GO:0008940|nitrate reductase activity
Methylobacter sp. UBA6696	1.94686e+06	DKJI01000100	fig|1946862.3.peg.2402	45456	45758	303	100	Respiratory nitrate reductase gamma chain (EC 1.7.99.4)	GO:0008940|nitrate reductase activity
Methylobacter sp. UBA6696	1.94686e+06	DKJI01000100	fig|1946862.3.peg.2403	45806	45991	186	61	Respiratory nitrate reductase gamma chain (EC 1.7.99.4)	GO:0008940|nitrate reductase activity
Methylobacter sp. UBA6696	1.94686e+06	DKJI01000100	fig|1946862.3.peg.2404	46005	46793	789	262	Respiratory nitrate reductase delta chain (EC 1.7.99.4)	GO:0008940|nitrate reductase activity
Methylobacter sp. UBA6696	1.94686e+06	DKJI01000130	fig|1946862.3.peg.1010	329	1891	1563	520	Respiratory nitrate reductase beta chain (EC 1.7.99.4)	GO:0008940|nitrate reductase activity
Methylobacter sp. UBA6696	1.94686e+06	DKJI01000130	fig|1946862.3.peg.1012	3327	7061	3735	1244	Respiratory nitrate reductase alpha chain (EC 1.7.99.4)	GO:0008940|nitrate reductase activity
Methylobacter sp. UBA6712	1.94686e+06	DKIS01000091	fig|1946864.3.peg.1736	55915	56592	678	225	Respiratory nitrate reductase gamma chain (EC 1.7.99.4)	GO:0008940|nitrate reductase activity
Methylobacter sp. UBA6712	1.94686e+06	DKIS01000091	fig|1946864.3.peg.1737	56606	57316	711	236	Respiratory nitrate reductase delta chain (EC 1.7.99.4)	GO:0008940|nitrate reductase activity
Methylobacter sp. UBA6712	1.94686e+06	DKIS01000091	fig|1946864.3.peg.1739	57631	59217	1587	528	Respiratory nitrate reductase beta chain (EC 1.7.99.4)	GO:0008940|nitrate reductase activity
Methylobacter sp. UBA6712	1.94686e+06	DKIS01000091	fig|1946864.3.peg.1740	59217	62957	3741	1246	Respiratory nitrate reductase alpha chain (EC 1.7.99.4)	GO:0008940|nitrate reductase activity
Methylobacter sp. strain FW305_bin.9	2.05196e+06	SCTW01000078	fig|2051955.10.peg.1783	46031	46708	678	225	Respiratory nitrate reductase gamma chain (EC 1.7.99.4)	GO:0008940|nitrate reductase activity
Methylobacter sp. strain FW305_bin.9	2.05196e+06	SCTW01000078	fig|2051955.10.peg.1784	46721	47425	705	234	Respiratory nitrate reductase delta chain (EC 1.7.99.4)	GO:0008940|nitrate reductase activity
Methylobacter sp. strain FW305_bin.9	2.05196e+06	SCTW01000078	fig|2051955.10.peg.1785	47545	49107	1563	520	Respiratory nitrate reductase beta chain (EC 1.7.99.4)	GO:0008940|nitrate reductase activity
Methylobacter sp. strain FW305_bin.9	2.05196e+06	SCTW01000078	fig|2051955.10.peg.1786	49104	52898	3795	1264	Respiratory nitrate reductase alpha chain (EC 1.7.99.4)	GO:0008940|nitrate reductase activity
Methylobacter sp. SO_2017_GW1 bin 29	2.05196e+06	JALNYY010000078	fig|2051955.21.peg.118	1505	3091	1587	528	Respiratory nitrate reductase beta chain (EC 1.7.99.4)	GO:0008940|nitrate reductase activity
Methylobacter sp. SO_2017_GW1 bin 29	2.05196e+06	JALNYY010000078	fig|2051955.21.peg.117	2	1504	1503	500	Respiratory nitrate reductase alpha chain (EC 1.7.99.4)	GO:0008940|nitrate reductase activity
Methylobacter sp. SO_2017_GW1 bin 29	2.05196e+06	JALNYY010000078	fig|2051955.21.peg.119	3349	4059	711	236	Respiratory nitrate reductase delta chain (EC 1.7.99.4)	GO:0008940|nitrate reductase activity
Methylobacter sp. SO_2017_GW1 bin 29	2.05196e+06	JALNYY010000078	fig|2051955.21.peg.120	4072	4749	678	225	Respiratory nitrate reductase gamma chain (EC 1.7.99.4)	GO:0008940|nitrate reductase activity
Methylobacter sp. SO_2017_GW1 bin 29	2.05196e+06	JALNYY010000108	fig|2051955.21.peg.912	12460	15246	2787	929	Respiratory nitrate reductase alpha chain (EC 1.7.99.4)	GO:0008940|nitrate reductase activity
Methylobacter sp. LH_M5	2.05196e+06	JAGXGY010000042	fig|2051955.23.peg.2714	234416	235093	678	225	Respiratory nitrate reductase gamma chain (EC 1.7.99.4)	GO:0008940|nitrate reductase activity
Methylobacter sp. LH_M5	2.05196e+06	JAGXGY010000042	fig|2051955.23.peg.2715	235107	235817	711	236	Respiratory nitrate reductase delta chain (EC 1.7.99.4)	GO:0008940|nitrate reductase activity
Methylobacter sp. LH_M5	2.05196e+06	JAGXGY010000042	fig|2051955.23.peg.2716	235968	237554	1587	528	Respiratory nitrate reductase beta chain (EC 1.7.99.4)	GO:0008940|nitrate reductase activity
Methylobacter sp. LH_M5	2.05196e+06	JAGXGY010000042	fig|2051955.23.peg.2717	237554	241303	3750	1249	Respiratory nitrate reductase alpha chain (EC 1.7.99.4)	GO:0008940|nitrate reductase activity
Methylobacter sp. strain DP16D_bin.19	2.05196e+06	SCPZ01000093	fig|2051955.9.peg.3147	24711	25388	678	225	Respiratory nitrate reductase gamma chain (EC 1.7.99.4)	GO:0008940|nitrate reductase activity
Methylobacter sp. strain DP16D_bin.19	2.05196e+06	SCPZ01000093	fig|2051955.9.peg.3148	25401	26111	711	236	Respiratory nitrate reductase delta chain (EC 1.7.99.4)	GO:0008940|nitrate reductase activity
Methylobacter sp. strain DP16D_bin.19	2.05196e+06	SCPZ01000093	fig|2051955.9.peg.3149	26219	27853	1635	544	Respiratory nitrate reductase beta chain (EC 1.7.99.4)	GO:0008940|nitrate reductase activity
Methylobacter sp. strain DP16D_bin.19	2.05196e+06	SCPZ01000093	fig|2051955.9.peg.3150	27850	31626	3777	1258	Respiratory nitrate reductase alpha chain (EC 1.7.99.4)	GO:0008940|nitrate reductase activity
Methylobacter sp. KRF1	2.49775e+06	RYFG01000006	fig|2497749.3.peg.191	101376	102053	678	225	Respiratory nitrate reductase gamma chain (EC 1.7.99.4)	GO:0008940|nitrate reductase activity
Methylobacter sp. KRF1	2.49775e+06	RYFG01000006	fig|2497749.3.peg.192	102066	102770	705	234	Respiratory nitrate reductase delta chain (EC 1.7.99.4)	GO:0008940|nitrate reductase activity
Methylobacter sp. KRF1	2.49775e+06	RYFG01000006	fig|2497749.3.peg.193	102950	104536	1587	528	Respiratory nitrate reductase beta chain (EC 1.7.99.4)	GO:0008940|nitrate reductase activity
Methylobacter sp. KRF1	2.49775e+06	RYFG01000006	fig|2497749.3.peg.194	104537	108274	3738	1245	Respiratory nitrate reductase alpha chain (EC 1.7.99.4)	GO:0008940|nitrate reductase activity
Methylomonas LK_5	416.38	416.38.con.0003	fig|416.38.peg.681	103102	104694	1593	530	Respiratory nitrate reductase beta chain (EC 1.7.99.4)	GO:0008940|nitrate reductase activity
Methylomonas LK_5	416.38	416.38.con.0003	fig|416.38.peg.682	104705	105418	714	237	Respiratory nitrate reductase delta chain (EC 1.7.99.4)	GO:0008940|nitrate reductase activity
Methylomonas LK_5	416.38	416.38.con.0003	fig|416.38.peg.683	105423	106100	678	225	Respiratory nitrate reductase gamma chain (EC 1.7.99.4)	GO:0008940|nitrate reductase activity
Methylomonas LK_5	416.38	416.38.con.0003	fig|416.38.peg.680	99365	103102	3738	1245	Respiratory nitrate reductase alpha chain (EC 1.7.99.4)	GO:0008940|nitrate reductase activity
Methylomonas LK_3	416.39	416.39.con.0019	fig|416.39.peg.2204	56583	57260	678	225	Respiratory nitrate reductase gamma chain (EC 1.7.99.4)	GO:0008940|nitrate reductase activity
Methylomonas LK_3	416.39	416.39.con.0019	fig|416.39.peg.2205	57265	57984	720	239	Respiratory nitrate reductase delta chain (EC 1.7.99.4)	GO:0008940|nitrate reductase activity
Methylomonas LK_3	416.39	416.39.con.0019	fig|416.39.peg.2206	57995	59584	1590	529	Respiratory nitrate reductase beta chain (EC 1.7.99.4)	GO:0008940|nitrate reductase activity
Methylomonas LK_3	416.39	416.39.con.0019	fig|416.39.peg.2207	59581	63363	3783	1260	Respiratory nitrate reductase alpha chain (EC 1.7.99.4)	GO:0008940|nitrate reductase activity
Methylomonas sp. SO_2017_LW3 bin 4	418.2	JALOBS010000005	fig|418.20.peg.65	10590	14330	3741	1246	Respiratory nitrate reductase alpha chain (EC 1.7.99.4)	GO:0008940|nitrate reductase activity
Methylomonas sp. SO_2017_LW3 bin 4	418.2	JALOBS010000005	fig|418.20.peg.66	14331	15887	1557	518	Respiratory nitrate reductase beta chain (EC 1.7.99.4)	GO:0008940|nitrate reductase activity
Methylomonas sp. SO_2017_LW3 bin 4	418.2	JALOBS010000005	fig|418.20.peg.67	15898	16608	711	236	Respiratory nitrate reductase delta chain (EC 1.7.99.4)	GO:0008940|nitrate reductase activity
Methylomonas sp. SO_2017_LW3 bin 4	418.2	JALOBS010000005	fig|418.20.peg.68	16623	17306	684	227	Respiratory nitrate reductase gamma chain (EC 1.7.99.4)	GO:0008940|nitrate reductase activity
Methylomonas methanica strain NCIMB 11130	421.18	LUUF01000063	fig|421.18.peg.2371	68548	69225	678	225	Respiratory nitrate reductase gamma chain (EC 1.7.99.4)	GO:0008940|nitrate reductase activity
Methylomonas methanica strain NCIMB 11130	421.18	LUUF01000063	fig|421.18.peg.2372	69230	69949	720	239	Respiratory nitrate reductase delta chain (EC 1.7.99.4)	GO:0008940|nitrate reductase activity
Methylomonas methanica strain NCIMB 11130	421.18	LUUF01000063	fig|421.18.peg.2373	69960	71555	1596	531	Respiratory nitrate reductase beta chain (EC 1.7.99.4)	GO:0008940|nitrate reductase activity
Methylomonas methanica strain NCIMB 11130	421.18	LUUF01000063	fig|421.18.peg.2374	71555	75292	3738	1245	Respiratory nitrate reductase alpha chain (EC 1.7.99.4)	GO:0008940|nitrate reductase activity
Methylomonas methanica strain R-45371	421.19	LUUH01000024	fig|421.19.peg.690	70841	71815	975	324	Respiratory nitrate reductase alpha chain (EC 1.7.99.4)	GO:0008940|nitrate reductase activity
Methylomonas methanica strain R-45371	421.19	LUUH01000024	fig|421.19.peg.691	71820	74591	2772	923	Respiratory nitrate reductase alpha chain (EC 1.7.99.4)	GO:0008940|nitrate reductase activity
Methylomonas methanica strain R-45371	421.19	LUUH01000024	fig|421.19.peg.692	74588	76144	1557	518	Respiratory nitrate reductase beta chain (EC 1.7.99.4)	GO:0008940|nitrate reductase activity
Methylomonas methanica strain R-45371	421.19	LUUH01000024	fig|421.19.peg.693	76155	76868	714	237	Respiratory nitrate reductase delta chain (EC 1.7.99.4)	GO:0008940|nitrate reductase activity
Methylomonas methanica strain R-45371	421.19	LUUH01000024	fig|421.19.peg.694	76891	77550	660	219	Respiratory nitrate reductase gamma chain (EC 1.7.99.4)	GO:0008940|nitrate reductase activity
Methylomonas methanica strain S-1	421.26	SMCN01000019	fig|421.26.peg.3555	11731	13326	1596	531	Respiratory nitrate reductase beta chain (EC 1.7.99.4)	GO:0008940|nitrate reductase activity
Methylomonas methanica strain S-1	421.26	SMCN01000019	fig|421.26.peg.3556	13337	14056	720	239	Respiratory nitrate reductase delta chain (EC 1.7.99.4)	GO:0008940|nitrate reductase activity
Methylomonas methanica strain S-1	421.26	SMCN01000019	fig|421.26.peg.3557	14061	14738	678	225	Respiratory nitrate reductase gamma chain (EC 1.7.99.4)	GO:0008940|nitrate reductase activity
Methylomonas methanica strain S-1	421.26	SMCN01000019	fig|421.26.peg.3554	7997	11731	3735	1244	Respiratory nitrate reductase alpha chain (EC 1.7.99.4)	GO:0008940|nitrate reductase activity
Methylobacter LK_1	429.13	429.13.con.0012	fig|429.13.peg.2156	12150	15905	3756	1251	Respiratory nitrate reductase alpha chain (EC 1.7.99.4)	GO:0008940|nitrate reductase activity
Methylobacter LK_1	429.13	429.13.con.0012	fig|429.13.peg.2159	16663	18225	1563	520	Respiratory nitrate reductase beta chain (EC 1.7.99.4)	GO:0008940|nitrate reductase activity
Methylobacter LK_1	429.13	429.13.con.0012	fig|429.13.peg.2160	18486	19193	708	235	Respiratory nitrate reductase delta chain (EC 1.7.99.4)	GO:0008940|nitrate reductase activity
Methylobacter LK_1	429.13	429.13.con.0012	fig|429.13.peg.2161	19206	19883	678	225	Respiratory nitrate reductase gamma chain (EC 1.7.99.4)	GO:0008940|nitrate reductase activity
Methylobacter tundripaludum SV96	697282	NZ_AEGW01000002	fig|697282.3.peg.664	105952	109695	3744	1247	Respiratory nitrate reductase alpha chain (EC 1.7.99.4)	GO:0008940|nitrate reductase activity
Methylobacter tundripaludum SV96	697282	NZ_AEGW01000002	fig|697282.3.peg.665	109692	111326	1635	544	Respiratory nitrate reductase beta chain (EC 1.7.99.4)	GO:0008940|nitrate reductase activity
Methylobacter tundripaludum SV96	697282	NZ_AEGW01000002	fig|697282.3.peg.666	111695	112399	705	234	Respiratory nitrate reductase delta chain (EC 1.7.99.4)	GO:0008940|nitrate reductase activity
Methylobacter tundripaludum SV96	697282	NZ_AEGW01000002	fig|697282.3.peg.668	112413	113090	678	225	Respiratory nitrate reductase gamma chain (EC 1.7.99.4)	GO:0008940|nitrate reductase activity
Methylomonas sp. LW13	107637	JNLB01000002	fig|107637.3.peg.771	70181	71587	1407	468	Cytochrome d ubiquinol oxidase subunit I (EC 1.10.3.-)	GO:0008827|cytochrome o ubiquinol oxidase activity;GO:0008827|cytochrome bo3 ubiquinol oxidase activity
Methylomonas sp. LW13	107637	JNLB01000003	fig|107637.3.peg.1279	228471	230027	1557	518	Cytochrome d ubiquinol oxidase subunit I (EC 1.10.3.-)	GO:0008827|cytochrome o ubiquinol oxidase activity;GO:0008827|cytochrome bo3 ubiquinol oxidase activity
Methylovulum miyakonense HT12	1.07885e+06	AQZU01000006	fig|1078846.3.peg.4012	1161373	1162932	1560	519	Cytochrome d ubiquinol oxidase subunit I (EC 1.10.3.-)	GO:0008827|cytochrome o ubiquinol oxidase activity;GO:0008827|cytochrome bo3 ubiquinol oxidase activity
Methylobacter luteus IMV-B-3098	1.09555e+06	ATYJ01000001	fig|1095552.3.peg.662	726477	728042	1566	521	Cytochrome d ubiquinol oxidase subunit I (EC 1.10.3.-)	GO:0006118|electron transport;GO:0016020|membrane;GO:0016491|oxidoreductase activity
Methylomonas sp. MK1	1.13155e+06	AQOV01000001	fig|1131552.3.peg.216	250928	252484	1557	518	Cytochrome d ubiquinol oxidase subunit I (EC 1.10.3.-)	GO:0006118|electron transport;GO:0016020|membrane;GO:0016491|oxidoreductase activity
Methylomonas sp. MK1	1.13155e+06	AQOV01000002	fig|1131552.3.peg.3604	239967	241373	1407	468	Cytochrome d ubiquinol oxidase subunit I (EC 1.10.3.-)	GO:0006118|electron transport;GO:0016020|membrane;GO:0016491|oxidoreductase activity
Methylomonas sp. 11b	1.16817e+06	AZXK01000001	fig|1168169.3.peg.760	779428	780984	1557	518	Cytochrome d ubiquinol oxidase subunit I (EC 1.10.3.-)	GO:0006118|electron transport;GO:0016020|membrane;GO:0016491|oxidoreductase activity
Methylomonas sp. 11b	1.16817e+06	AZXK01000002	fig|1168169.3.peg.2474	1462038	1463444	1407	468	Cytochrome d ubiquinol oxidase subunit I (EC 1.10.3.-)	GO:0006118|electron transport;GO:0016020|membrane;GO:0016491|oxidoreductase activity
Methylomonas koyamae JCM 16701	1.29426e+06	BBCK01000021	fig|1294261.13.peg.2006	23327	24265	939	312	Cytochrome d ubiquinol oxidase subunit I (EC 1.10.3.-)	GO:0008827|cytochrome o ubiquinol oxidase activity;GO:0008827|cytochrome bo3 ubiquinol oxidase activity
Methylomonas koyamae JCM 16701	1.29426e+06	BBCK01000054	fig|1294261.13.peg.3613	14263	15375	1113	370	Cytochrome d ubiquinol oxidase subunit I (EC 1.10.3.-)	GO:0008827|cytochrome o ubiquinol oxidase activity;GO:0008827|cytochrome bo3 ubiquinol oxidase activity
Methylomonas koyamae JCM 16701	1.29426e+06	BBCK01000054	fig|1294261.13.peg.3614	15372	15719	348	115	Cytochrome d ubiquinol oxidase subunit I (EC 1.10.3.-)	GO:0008827|cytochrome o ubiquinol oxidase activity;GO:0008827|cytochrome bo3 ubiquinol oxidase activity
Methylomonas koyamae JCM 16701	1.29426e+06	BBCK01000054	fig|1294261.13.peg.3615	15698	15820	123	40	Cytochrome d ubiquinol oxidase subunit I (EC 1.10.3.-)	GO:0008827|cytochrome o ubiquinol oxidase activity;GO:0008827|cytochrome bo3 ubiquinol oxidase activity
Methylogaea LK_2	1.29538e+06	1295378.4.con.0017	fig|1295378.4.peg.1056	2428	3858	1431	476	Cytochrome d ubiquinol oxidase subunit I (EC 1.10.3.-)	GO:0008827|cytochrome o ubiquinol oxidase activity;GO:0008827|cytochrome bo3 ubiquinol oxidase activity
Methylogaea LK_2	1.29538e+06	1295378.4.con.0043	fig|1295378.4.peg.2040	20763	22172	1410	469	Cytochrome d ubiquinol oxidase subunit I (EC 1.10.3.-)	GO:0008827|cytochrome o ubiquinol oxidase activity;GO:0008827|cytochrome bo3 ubiquinol oxidase activity
Methylogaea LK_2	1.29538e+06	1295378.4.con.0100	fig|1295378.4.peg.3112	1132	2697	1566	521	Cytochrome d ubiquinol oxidase subunit I (EC 1.10.3.-)	GO:0008827|cytochrome o ubiquinol oxidase activity;GO:0008827|cytochrome bo3 ubiquinol oxidase activity
Methylogaea oryzae strain E10	1.29538e+06	AP019782	fig|1295382.3.peg.1922	2112084	2113640	1557	518	Cytochrome d ubiquinol oxidase subunit I (EC 1.10.3.-)	GO:0008827|cytochrome o ubiquinol oxidase activity;GO:0008827|cytochrome bo3 ubiquinol oxidase activity
Methylogaea oryzae strain E10	1.29538e+06	AP019782	fig|1295382.3.peg.934	956874	958304	1431	476	Cytochrome d ubiquinol oxidase subunit I (EC 1.10.3.-)	GO:0008827|cytochrome o ubiquinol oxidase activity;GO:0008827|cytochrome bo3 ubiquinol oxidase activity
Methylobacter tundripaludum 21/22	1.40845e+06	JMLA01000001	fig|1408450.3.peg.3217	3494662	3496068	1407	468	Cytochrome d ubiquinol oxidase subunit I (EC 1.10.3.-)	GO:0008827|cytochrome o ubiquinol oxidase activity;GO:0008827|cytochrome bo3 ubiquinol oxidase activity
Methylobacter tundripaludum 21/22	1.40845e+06	JMLA01000001	fig|1408450.3.peg.3313	3592445	3594007	1563	520	Cytochrome d ubiquinol oxidase subunit I (EC 1.10.3.-)	GO:0008827|cytochrome o ubiquinol oxidase activity;GO:0008827|cytochrome bo3 ubiquinol oxidase activity
Methylobacter tundripaludum 31/32	1.40845e+06	JPOH01000001	fig|1408451.3.peg.4310	4601310	4602716	1407	468	Cytochrome d ubiquinol oxidase subunit I (EC 1.10.3.-)	GO:0008827|cytochrome o ubiquinol oxidase activity;GO:0008827|cytochrome bo3 ubiquinol oxidase activity
Methylobacter tundripaludum 31/32	1.40845e+06	JPOH01000001	fig|1408451.3.peg.4470	4786553	4788115	1563	520	Cytochrome d ubiquinol oxidase subunit I (EC 1.10.3.-)	GO:0008827|cytochrome o ubiquinol oxidase activity;GO:0008827|cytochrome bo3 ubiquinol oxidase activity
Methyloterricola oryzae strain 73a	1.49505e+06	JYNS01000007	fig|1495050.5.peg.2260	2719	4302	1584	527	Cytochrome d ubiquinol oxidase subunit I (EC 1.10.3.-)	GO:0008827|cytochrome o ubiquinol oxidase activity;GO:0008827|cytochrome bo3 ubiquinol oxidase activity
Methylobacter sp. BBA5.1	1.49506e+06	JQKS01000018	fig|1495064.3.peg.2845	92793	94358	1566	521	Cytochrome d ubiquinol oxidase subunit I (EC 1.10.3.-)	GO:0008827|cytochrome o ubiquinol oxidase activity;GO:0008827|cytochrome bo3 ubiquinol oxidase activity
Methylocaldum sp. 175 strain 175	1.5281e+06	FXAM01000001	fig|1528100.4.peg.4504	3918853	3920436	1584	527	Cytochrome d ubiquinol oxidase subunit I (EC 1.10.3.-)	GO:0008827|cytochrome o ubiquinol oxidase activity;GO:0008827|cytochrome bo3 ubiquinol oxidase activity
Methylomonas denitrificans FJG1	1.53855e+06	JTDD01000011	fig|1538553.4.peg.826	81237	82172	936	311	Cytochrome d ubiquinol oxidase subunit I (EC 1.10.3.-)	GO:0008827|cytochrome o ubiquinol oxidase activity;GO:0008827|cytochrome bo3 ubiquinol oxidase activity
Methylomonas denitrificans FJG1	1.53855e+06	JTDD01000068	fig|1538553.4.peg.3610	21019	22575	1557	518	Cytochrome d ubiquinol oxidase subunit I (EC 1.10.3.-)	GO:0008827|cytochrome o ubiquinol oxidase activity;GO:0008827|cytochrome bo3 ubiquinol oxidase activity
Methylomonas sp. Kb3	1.61154e+06	PIZT01000007	fig|1611544.3.peg.4097	43888	45294	1407	468	Cytochrome d ubiquinol oxidase subunit I (EC 1.10.3.-)	GO:0008827|cytochrome o ubiquinol oxidase activity;GO:0008827|cytochrome bo3 ubiquinol oxidase activity
Methylomonas sp. Kb3	1.61154e+06	PIZT01000010	fig|1611544.3.peg.3503	147339	148889	1551	516	Cytochrome d ubiquinol oxidase subunit I (EC 1.10.3.-)	GO:0008827|cytochrome o ubiquinol oxidase activity;GO:0008827|cytochrome bo3 ubiquinol oxidase activity
Methylomonas sp. DH-1	1.7272e+06	CP014360	fig|1727196.4.peg.4046	4156582	4158141	1560	519	Cytochrome d ubiquinol oxidase subunit I (EC 1.10.3.-)	GO:0008827|cytochrome o ubiquinol oxidase activity;GO:0008827|cytochrome bo3 ubiquinol oxidase activity
Methylomonas sp. DH-1	1.7272e+06	CP014360	fig|1727196.4.peg.632	637356	638762	1407	468	Cytochrome d ubiquinol oxidase subunit I (EC 1.10.3.-)	GO:0008827|cytochrome o ubiquinol oxidase activity;GO:0008827|cytochrome bo3 ubiquinol oxidase activity
Methylobacter tundripaludum Tobar13m-G39	173365	JAIPFK010000013	fig|173365.10.peg.1458	68311	69873	1563	520	Cytochrome d ubiquinol oxidase subunit I (EC 1.10.3.-)	GO:0008827|cytochrome o ubiquinol oxidase activity;GO:0008827|cytochrome bo3 ubiquinol oxidase activity
Methylobacter tundripaludum SO_2017_LW4 bin 69	173365	JALOCG010000001	fig|173365.13.peg.1375	186045	187607	1563	520	Cytochrome d ubiquinol oxidase subunit I (EC 1.10.3.-)	GO:0008827|cytochrome o ubiquinol oxidase activity;GO:0008827|cytochrome bo3 ubiquinol oxidase activity
Methylobacter tundripaludum strain OWC-G53F	173366	PTIY01000008	fig|173365.5.peg.2264	8050	9612	1563	520	Cytochrome d ubiquinol oxidase subunit I (EC 1.10.3.-)	GO:0008827|cytochrome o ubiquinol oxidase activity;GO:0008827|cytochrome bo3 ubiquinol oxidase activity
Methylobacter tundripaludum strain OWC-DMM	173366	PTIZ01000007	fig|173365.6.peg.3067	163222	164784	1563	520	Cytochrome d ubiquinol oxidase subunit I (EC 1.10.3.-)	GO:0008827|cytochrome o ubiquinol oxidase activity;GO:0008827|cytochrome bo3 ubiquinol oxidase activity
Methylobacter tundripaludum strain OWC-DMM	173366	PTIZ01000007	fig|173365.6.peg.2963	67138	68565	1428	475	Cytochrome d ubiquinol oxidase subunit I (EC 1.10.3.-)	GO:0008827|cytochrome o ubiquinol oxidase activity;GO:0008827|cytochrome bo3 ubiquinol oxidase activity
Methylomagnum ishizawai strain RS11D-Pr	1.76099e+06	AP019783	fig|1760988.4.peg.3737	3853350	3854933	1584	527	Cytochrome d ubiquinol oxidase subunit I (EC 1.10.3.-)	GO:0008827|cytochrome o ubiquinol oxidase activity;GO:0008827|cytochrome bo3 ubiquinol oxidase activity
Methylomonas sp. ZR1	1.79707e+06	RCST01000001	fig|1797072.3.peg.1694	1754253	1755803	1551	516	Cytochrome d ubiquinol oxidase subunit I (EC 1.10.3.-)	GO:0008827|cytochrome o ubiquinol oxidase activity;GO:0008827|cytochrome bo3 ubiquinol oxidase activity
Methylomonas sp. ZR1	1.79707e+06	RCST01000001	fig|1797072.3.peg.3501	3648976	3650382	1407	468	Cytochrome d ubiquinol oxidase subunit I (EC 1.10.3.-)	GO:0008827|cytochrome o ubiquinol oxidase activity;GO:0008827|cytochrome bo3 ubiquinol oxidase activity
Methylomonas sp. EbA	1.85456e+06	JACXSS010000001	fig|1854563.3.peg.1896	1927795	1929345	1551	516	Cytochrome d ubiquinol oxidase subunit I (EC 1.10.3.-)	GO:0008827|cytochrome o ubiquinol oxidase activity;GO:0008827|cytochrome bo3 ubiquinol oxidase activity
Methylomonas sp. EbA	1.85456e+06	JACXSS010000001	fig|1854563.3.peg.455	460732	462138	1407	468	Cytochrome d ubiquinol oxidase subunit I (EC 1.10.3.-)	GO:0008827|cytochrome o ubiquinol oxidase activity;GO:0008827|cytochrome bo3 ubiquinol oxidase activity
Methylomonas sp. EbB	1.85456e+06	JACXST010000001	fig|1854564.3.peg.96	98420	99826	1407	468	Cytochrome d ubiquinol oxidase subunit I (EC 1.10.3.-)	GO:0008827|cytochrome o ubiquinol oxidase activity;GO:0008827|cytochrome bo3 ubiquinol oxidase activity
Methylomonas sp. EbB	1.85456e+06	JACXST010000003	fig|1854564.3.peg.4420	672369	673919	1551	516	Cytochrome d ubiquinol oxidase subunit I (EC 1.10.3.-)	GO:0008827|cytochrome o ubiquinol oxidase activity;GO:0008827|cytochrome bo3 ubiquinol oxidase activity
Methylomonas sp. LWB	1.90585e+06	MKMC01000010	fig|1905845.3.peg.1197	79286	80851	1566	521	Cytochrome d ubiquinol oxidase subunit I (EC 1.10.3.-)	GO:0008827|cytochrome o ubiquinol oxidase activity;GO:0008827|cytochrome bo3 ubiquinol oxidase activity
Methylomonas sp. LWB	1.90585e+06	MKMC01000014	fig|1905845.3.peg.1962	62145	63536	1392	463	Cytochrome d ubiquinol oxidase subunit I (EC 1.10.3.-)	GO:0008827|cytochrome o ubiquinol oxidase activity;GO:0008827|cytochrome bo3 ubiquinol oxidase activity
Methylobacter sp. UBA2091	1.94686e+06	DCZF01000090	fig|1946861.3.peg.1270	7501	9063	1563	520	Cytochrome d ubiquinol oxidase subunit I (EC 1.10.3.-)	GO:0008827|cytochrome o ubiquinol oxidase activity;GO:0008827|cytochrome bo3 ubiquinol oxidase activity
Methylobacter sp. UBA2091	1.94686e+06	DCZF01000099	fig|1946861.3.peg.1312	10247	11674	1428	475	Cytochrome d ubiquinol oxidase subunit I (EC 1.10.3.-)	GO:0008827|cytochrome o ubiquinol oxidase activity;GO:0008827|cytochrome bo3 ubiquinol oxidase activity
Methylobacter sp. UBA6696	1.94686e+06	DKJI01000028	fig|1946862.3.peg.869	17511	18938	1428	475	Cytochrome d ubiquinol oxidase subunit I (EC 1.10.3.-)	GO:0008827|cytochrome o ubiquinol oxidase activity;GO:0008827|cytochrome bo3 ubiquinol oxidase activity
Methylobacter sp. UBA6696	1.94686e+06	DKJI01000089	fig|1946862.3.peg.1804	7445	9007	1563	520	Cytochrome d ubiquinol oxidase subunit I (EC 1.10.3.-)	GO:0008827|cytochrome o ubiquinol oxidase activity;GO:0008827|cytochrome bo3 ubiquinol oxidase activity
Methylobacter sp. UBA6712	1.94686e+06	DKIS01000001	fig|1946864.3.peg.2807	17658	19064	1407	468	Cytochrome d ubiquinol oxidase subunit I (EC 1.10.3.-)	GO:0008827|cytochrome o ubiquinol oxidase activity;GO:0008827|cytochrome bo3 ubiquinol oxidase activity
Methylobacter sp. UBA6712	1.94686e+06	DKIS01000102	fig|1946864.3.peg.3172	44439	46001	1563	520	Cytochrome d ubiquinol oxidase subunit I (EC 1.10.3.-)	GO:0008827|cytochrome o ubiquinol oxidase activity;GO:0008827|cytochrome bo3 ubiquinol oxidase activity
Methylobacter sp. strain FW305_bin.9	2.05196e+06	SCTW01000143	fig|2051955.10.peg.3653	58813	60174	1362	453	Cytochrome d ubiquinol oxidase subunit I (EC 1.10.3.-)	GO:0008827|cytochrome o ubiquinol oxidase activity;GO:0008827|cytochrome bo3 ubiquinol oxidase activity
Methylobacter sp. SO_2017_LW4 bin 67	2.05196e+06	JALOCF010000012	fig|2051955.20.peg.4114	77078	78634	1557	518	Cytochrome d ubiquinol oxidase subunit I (EC 1.10.3.-)	GO:0008827|cytochrome o ubiquinol oxidase activity;GO:0008827|cytochrome bo3 ubiquinol oxidase activity
Methylobacter sp. SO_2017_GW1 bin 29	2.05196e+06	JALNYY010000055	fig|2051955.21.peg.4313	3078	4640	1563	520	Cytochrome d ubiquinol oxidase subunit I (EC 1.10.3.-)	GO:0008827|cytochrome o ubiquinol oxidase activity;GO:0008827|cytochrome bo3 ubiquinol oxidase activity
Methylobacter sp. B4-02	2.05196e+06	JAMJFP010000001	fig|2051955.22.peg.1100	192858	194423	1566	521	Cytochrome d ubiquinol oxidase subunit I (EC 1.10.3.-)	GO:0008827|cytochrome o ubiquinol oxidase activity;GO:0008827|cytochrome bo3 ubiquinol oxidase activity
Methylobacter sp. strain DP16D_bin.19	2.05196e+06	SCPZ01000071	fig|2051955.9.peg.2503	4442	6007	1566	521	Cytochrome d ubiquinol oxidase subunit I (EC 1.10.3.-)	GO:0008827|cytochrome o ubiquinol oxidase activity;GO:0008827|cytochrome bo3 ubiquinol oxidase activity
Methylococcus capsulatus str. Bath	243234	NC_002977	fig|243233.7.peg.1131	1160863	1162440	1578	525	Cytochrome d ubiquinol oxidase subunit I (EC 1.10.3.-)	GO:0008827|cytochrome o ubiquinol oxidase activity;GO:0008827|cytochrome bo3 ubiquinol oxidase activity
Methylobacter sp. KRF1	2.49775e+06	RYFG01000065	fig|2497749.3.peg.3908	19445	21007	1563	520	Cytochrome d ubiquinol oxidase subunit I (EC 1.10.3.-)	GO:0008827|cytochrome o ubiquinol oxidase activity;GO:0008827|cytochrome bo3 ubiquinol oxidase activity
Methylomonas sp. GJ1	2.60898e+06	CP043929	fig|2608981.3.peg.402	421442	422830	1389	462	Cytochrome d ubiquinol oxidase subunit I (EC 1.10.3.-)	GO:0008827|cytochrome o ubiquinol oxidase activity;GO:0008827|cytochrome bo3 ubiquinol oxidase activity
Methylomonas sp. GJ1	2.60898e+06	CP043929	fig|2608981.3.peg.546	566470	568032	1563	520	Cytochrome d ubiquinol oxidase subunit I (EC 1.10.3.-)	GO:0008827|cytochrome o ubiquinol oxidase activity;GO:0008827|cytochrome bo3 ubiquinol oxidase activity
Methylomicrobium alcaliphilum strain 20Z	271065	FO082060	fig|271065.3.peg.285	292688	294262	1575	524	Cytochrome d ubiquinol oxidase subunit I (EC 1.10.3.-)	GO:0006118|electron transport;GO:0016020|membrane;GO:0016491|oxidoreductase activity
Methylomonas sp. LL1	2.78579e+06	CP064653	fig|2785785.3.peg.3664	3799054	3800451	1398	465	Cytochrome d ubiquinol oxidase subunit I (EC 1.10.3.-)	GO:0008827|cytochrome o ubiquinol oxidase activity;GO:0008827|cytochrome bo3 ubiquinol oxidase activity
Methylomonas sp. LL1	2.78579e+06	CP064653	fig|2785785.3.peg.4495	4616576	4618135	1560	519	Cytochrome d ubiquinol oxidase subunit I (EC 1.10.3.-)	GO:0008827|cytochrome o ubiquinol oxidase activity;GO:0008827|cytochrome bo3 ubiquinol oxidase activity
Methylomicrobium sp. RS1	2.80205e+06	JAERVK010000012	fig|2802053.3.peg.506	115724	117286	1563	520	Cytochrome d ubiquinol oxidase subunit I (EC 1.10.3.-)	GO:0008827|cytochrome o ubiquinol oxidase activity;GO:0008827|cytochrome bo3 ubiquinol oxidase activity
Methylomonas sp. EFPC1	2.81265e+06	CP070494	fig|2812647.3.peg.2627	2661601	2663151	1551	516	Cytochrome d ubiquinol oxidase subunit I (EC 1.10.3.-)	GO:0008827|cytochrome o ubiquinol oxidase activity;GO:0008827|cytochrome bo3 ubiquinol oxidase activity
Methylomonas sp. EFPC1	2.81265e+06	CP070494	fig|2812647.3.peg.508	516109	517515	1407	468	Cytochrome d ubiquinol oxidase subunit I (EC 1.10.3.-)	GO:0008827|cytochrome o ubiquinol oxidase activity;GO:0008827|cytochrome bo3 ubiquinol oxidase activity
Methylobacter whittenburyi strain ACM 3310	39770.3	JQNS01000005	fig|39770.3.peg.3580	1615815	1617380	1566	521	Cytochrome d ubiquinol oxidase subunit I (EC 1.10.3.-)	GO:0008827|cytochrome o ubiquinol oxidase activity;GO:0008827|cytochrome bo3 ubiquinol oxidase activity
Methylobacter whittenburyi strain UCM-B-3033	39770.6	JQNS01000005	fig|39770.6.peg.3794	1615815	1617380	1566	521	Cytochrome d ubiquinol oxidase subunit I (EC 1.10.3.-)	GO:0008827|cytochrome o ubiquinol oxidase activity;GO:0008827|cytochrome bo3 ubiquinol oxidase activity
Methylomicrobium agile strain ATCC 35068	39774.3	JPOJ01000001	fig|39774.3.peg.1851	1872037	1873599	1563	520	Cytochrome d ubiquinol oxidase subunit I (EC 1.10.3.-)	GO:0008827|cytochrome o ubiquinol oxidase activity;GO:0008827|cytochrome bo3 ubiquinol oxidase activity
Methylomonas LK_5	416.38	416.38.con.0003	fig|416.38.peg.628	44176	45567	1392	463	Cytochrome d ubiquinol oxidase subunit I (EC 1.10.3.-)	GO:0008827|cytochrome o ubiquinol oxidase activity;GO:0008827|cytochrome bo3 ubiquinol oxidase activity
Methylomonas LK_5	416.38	416.38.con.0009	fig|416.38.peg.1554	15431	16996	1566	521	Cytochrome d ubiquinol oxidase subunit I (EC 1.10.3.-)	GO:0008827|cytochrome o ubiquinol oxidase activity;GO:0008827|cytochrome bo3 ubiquinol oxidase activity
Methylomonas LK_3	416.39	416.39.con.0015	fig|416.39.peg.1828	16711	18102	1392	463	Cytochrome d ubiquinol oxidase subunit I (EC 1.10.3.-)	GO:0008827|cytochrome o ubiquinol oxidase activity;GO:0008827|cytochrome bo3 ubiquinol oxidase activity
Methylomonas LK_3	416.39	416.39.con.0043	fig|416.39.peg.3250	13210	14763	1554	517	Cytochrome d ubiquinol oxidase subunit I (EC 1.10.3.-)	GO:0008827|cytochrome o ubiquinol oxidase activity;GO:0008827|cytochrome bo3 ubiquinol oxidase activity
Methylomonas LK_4	416.4	416.40.con.0001	fig|416.40.peg.675	668890	670449	1560	519	Cytochrome d ubiquinol oxidase subunit I (EC 1.10.3.-)	GO:0008827|cytochrome o ubiquinol oxidase activity;GO:0008827|cytochrome bo3 ubiquinol oxidase activity
Methylomonas LK_4	416.4	416.40.con.0003	fig|416.40.peg.1638	208236	209621	1386	461	Cytochrome d ubiquinol oxidase subunit I (EC 1.10.3.-)	GO:0008827|cytochrome o ubiquinol oxidase activity;GO:0008827|cytochrome bo3 ubiquinol oxidase activity
Methylomonas sp. SO_2017_LW3 bin 4	418.2	JALOBS010000008	fig|418.20.peg.648	49586	51148	1563	520	Cytochrome d ubiquinol oxidase subunit I (EC 1.10.3.-)	GO:0008827|cytochrome o ubiquinol oxidase activity;GO:0008827|cytochrome bo3 ubiquinol oxidase activity
Methylomonas sp. SO_2017_LW3 bin 4	418.2	JALOBS010000010	fig|418.20.peg.1246	137605	138996	1392	463	Cytochrome d ubiquinol oxidase subunit I (EC 1.10.3.-)	GO:0008827|cytochrome o ubiquinol oxidase activity;GO:0008827|cytochrome bo3 ubiquinol oxidase activity
Methylomonas sp. strain FW.007	418.6	PERU01000012	fig|418.6.peg.1934	57170	58561	1392	463	Cytochrome d ubiquinol oxidase subunit I (EC 1.10.3.-)	GO:0008827|cytochrome o ubiquinol oxidase activity;GO:0008827|cytochrome bo3 ubiquinol oxidase activity
Methylomonas sp. strain FW.007	418.6	PERU01000043	fig|418.6.peg.3629	18567	20099	1533	510	Cytochrome d ubiquinol oxidase subunit I (EC 1.10.3.-)	GO:0008827|cytochrome o ubiquinol oxidase activity;GO:0008827|cytochrome bo3 ubiquinol oxidase activity
Methylomonas methanica strain R-45363	421.17	LUUG01000050	fig|421.17.peg.1212	86188	87744	1557	518	Cytochrome d ubiquinol oxidase subunit I (EC 1.10.3.-)	GO:0008827|cytochrome o ubiquinol oxidase activity;GO:0008827|cytochrome bo3 ubiquinol oxidase activity
Methylomonas methanica strain R-45363	421.17	LUUG01000065	fig|421.17.peg.2278	34239	35645	1407	468	Cytochrome d ubiquinol oxidase subunit I (EC 1.10.3.-)	GO:0008827|cytochrome o ubiquinol oxidase activity;GO:0008827|cytochrome bo3 ubiquinol oxidase activity
Methylomonas methanica strain NCIMB 11130	421.18	LUUF01000043	fig|421.18.peg.1043	80541	81947	1407	468	Cytochrome d ubiquinol oxidase subunit I (EC 1.10.3.-)	GO:0008827|cytochrome o ubiquinol oxidase activity;GO:0008827|cytochrome bo3 ubiquinol oxidase activity
Methylomonas methanica strain NCIMB 11130	421.18	LUUF01000069	fig|421.18.peg.2558	22411	23967	1557	518	Cytochrome d ubiquinol oxidase subunit I (EC 1.10.3.-)	GO:0008827|cytochrome o ubiquinol oxidase activity;GO:0008827|cytochrome bo3 ubiquinol oxidase activity
Methylomonas methanica strain R-45371	421.19	LUUH01000024	fig|421.19.peg.625	8057	9463	1407	468	Cytochrome d ubiquinol oxidase subunit I (EC 1.10.3.-)	GO:0008827|cytochrome o ubiquinol oxidase activity;GO:0008827|cytochrome bo3 ubiquinol oxidase activity
Methylomonas methanica strain R-45371	421.19	LUUH01000087	fig|421.19.peg.4538	28	1584	1557	518	Cytochrome d ubiquinol oxidase subunit I (EC 1.10.3.-)	GO:0008827|cytochrome o ubiquinol oxidase activity;GO:0008827|cytochrome bo3 ubiquinol oxidase activity
Methylomonas methanica strain S-1	421.26	SMCN01000007	fig|421.26.peg.2055	163051	164457	1407	468	Cytochrome d ubiquinol oxidase subunit I (EC 1.10.3.-)	GO:0008827|cytochrome o ubiquinol oxidase activity;GO:0008827|cytochrome bo3 ubiquinol oxidase activity
Methylomonas methanica strain S-1	421.26	SMCN01000026	fig|421.26.peg.4053	22487	24043	1557	518	Cytochrome d ubiquinol oxidase subunit I (EC 1.10.3.-)	GO:0008827|cytochrome o ubiquinol oxidase activity;GO:0008827|cytochrome bo3 ubiquinol oxidase activity
Methylobacter LK_1	429.13	429.13.con.0038	fig|429.13.peg.3494	10996	12558	1563	520	Cytochrome d ubiquinol oxidase subunit I (EC 1.10.3.-)	GO:0008827|cytochrome o ubiquinol oxidase activity;GO:0008827|cytochrome bo3 ubiquinol oxidase activity
Methylobacter marinus A45	674036	ARVS01000001	fig|674036.3.peg.558	597320	598885	1566	521	Cytochrome d ubiquinol oxidase subunit I (EC 1.10.3.-)	GO:0006118|electron transport;GO:0016020|membrane;GO:0016491|oxidoreductase activity
Methylomicrobium album BG8	686341	CM001475	fig|686340.8.peg.416	412193	413755	1563	520	Cytochrome d ubiquinol oxidase subunit I (EC 1.10.3.-)	GO:0008827|cytochrome o ubiquinol oxidase activity;GO:0008827|cytochrome bo3 ubiquinol oxidase activity
Methylobacter tundripaludum SV96	697282	NZ_AEGW01000006	fig|697282.3.peg.2212	70786	72219	1434	477	Cytochrome d ubiquinol oxidase subunit I (EC 1.10.3.-)	GO:0006118|electron transport;GO:0016020|membrane;GO:0016491|oxidoreductase activity
Methylobacter tundripaludum SV96	697282	NZ_AEGW01000018	fig|697282.3.peg.4101	44883	46445	1563	520	Cytochrome d ubiquinol oxidase subunit I (EC 1.10.3.-)	GO:0006118|electron transport;GO:0016020|membrane;GO:0016491|oxidoreductase activity
Methylomonas koyamae strain R-45383	702114	LUUK01000026	fig|702114.13.peg.618	10854	12419	1566	521	Cytochrome d ubiquinol oxidase subunit I (EC 1.10.3.-)	GO:0008827|cytochrome o ubiquinol oxidase activity;GO:0008827|cytochrome bo3 ubiquinol oxidase activity
Methylomonas koyamae strain R-45383	702114	LUUK01000200	fig|702114.13.peg.4465	10930	12321	1392	463	Cytochrome d ubiquinol oxidase subunit I (EC 1.10.3.-)	GO:0008827|cytochrome o ubiquinol oxidase activity;GO:0008827|cytochrome bo3 ubiquinol oxidase activity
Methylomonas koyamae strain R-49807	702114	LUUL01000053	fig|702114.14.peg.977	16832	18391	1560	519	Cytochrome d ubiquinol oxidase subunit I (EC 1.10.3.-)	GO:0008827|cytochrome o ubiquinol oxidase activity;GO:0008827|cytochrome bo3 ubiquinol oxidase activity
Methylomonas koyamae strain R-49807	702114	LUUL01000055	fig|702114.14.peg.1126	25674	27080	1407	468	Cytochrome d ubiquinol oxidase subunit I (EC 1.10.3.-)	GO:0008827|cytochrome o ubiquinol oxidase activity;GO:0008827|cytochrome bo3 ubiquinol oxidase activity
Methylomonas koyamae strain R-45378	702114	LUUJ01000054	fig|702114.15.peg.1080	18663	20222	1560	519	Cytochrome d ubiquinol oxidase subunit I (EC 1.10.3.-)	GO:0008827|cytochrome o ubiquinol oxidase activity;GO:0008827|cytochrome bo3 ubiquinol oxidase activity
Methylomonas koyamae strain R-45378	702114	LUUJ01000086	fig|702114.15.peg.2637	25663	27069	1407	468	Cytochrome d ubiquinol oxidase subunit I (EC 1.10.3.-)	GO:0008827|cytochrome o ubiquinol oxidase activity;GO:0008827|cytochrome bo3 ubiquinol oxidase activity
Methylomonas koyamae strain LM6	702114	CP023669	fig|702114.17.peg.4091	4241736	4243295	1560	519	Cytochrome d ubiquinol oxidase subunit I (EC 1.10.3.-)	GO:0008827|cytochrome o ubiquinol oxidase activity;GO:0008827|cytochrome bo3 ubiquinol oxidase activity
Methylomonas koyamae strain LM6	702114	CP023669	fig|702114.17.peg.661	677446	678852	1407	468	Cytochrome d ubiquinol oxidase subunit I (EC 1.10.3.-)	GO:0008827|cytochrome o ubiquinol oxidase activity;GO:0008827|cytochrome bo3 ubiquinol oxidase activity
Methylomonas koyamae strain Fw12E-Y strain SM2	702114	PPPU01000005	fig|702114.21.peg.3658	123692	125086	1395	464	Cytochrome d ubiquinol oxidase subunit I (EC 1.10.3.-)	GO:0008827|cytochrome o ubiquinol oxidase activity;GO:0008827|cytochrome bo3 ubiquinol oxidase activity
Methylomonas koyamae strain Fw12E-Y strain SM2	702114	PPPU01000017	fig|702114.21.peg.1192	101140	102699	1560	519	Cytochrome d ubiquinol oxidase subunit I (EC 1.10.3.-)	GO:0008827|cytochrome o ubiquinol oxidase activity;GO:0008827|cytochrome bo3 ubiquinol oxidase activity
Methylomonas koyamae strain Fw12E-Y	702114	AP019777	fig|702114.23.peg.4056	4192776	4194335	1560	519	Cytochrome d ubiquinol oxidase subunit I (EC 1.10.3.-)	GO:0008827|cytochrome o ubiquinol oxidase activity;GO:0008827|cytochrome bo3 ubiquinol oxidase activity
Methylomonas koyamae strain Fw12E-Y	702114	AP019777	fig|702114.23.peg.610	607150	608556	1407	468	Cytochrome d ubiquinol oxidase subunit I (EC 1.10.3.-)	GO:0008827|cytochrome o ubiquinol oxidase activity;GO:0008827|cytochrome bo3 ubiquinol oxidase activity
Methylomonas methanica MC09	857087	NC_015572	fig|857087.3.peg.3374	3648654	3650216	1563	520	Cytochrome d ubiquinol oxidase subunit I (EC 1.10.3.-)	GO:0006118|electron transport;GO:0016020|membrane;GO:0016491|oxidoreductase activity
Methylomonas methanica MC09	857087	NC_015572	fig|857087.3.peg.4330	4688208	4689599	1392	463	Cytochrome d ubiquinol oxidase subunit I (EC 1.10.3.-)	GO:0006118|electron transport;GO:0016020|membrane;GO:0016491|oxidoreductase activity
Methylomonas lenta strain R-45370	980561	LUUI01000127	fig|980561.3.peg.3407	16349	17911	1563	520	Cytochrome d ubiquinol oxidase subunit I (EC 1.10.3.-)	GO:0008827|cytochrome o ubiquinol oxidase activity;GO:0008827|cytochrome bo3 ubiquinol oxidase activity
Methylomonas lenta strain R-45370	980561	LUUI01000143	fig|980561.3.peg.3819	27569	28966	1398	465	Cytochrome d ubiquinol oxidase subunit I (EC 1.10.3.-)	GO:0008827|cytochrome o ubiquinol oxidase activity;GO:0008827|cytochrome bo3 ubiquinol oxidase activity
Methylomonas sp. LW13	107637	JNLB01000002	fig|107637.3.peg.772	71577	72668	1092	363	Cytochrome d ubiquinol oxidase subunit II (EC 1.10.3.-)	GO:0008827|cytochrome o ubiquinol oxidase activity;GO:0008827|cytochrome bo3 ubiquinol oxidase activity
Methylomonas sp. LW13	107637	JNLB01000003	fig|107637.3.peg.1278	227307	228446	1140	379	Cytochrome d ubiquinol oxidase subunit II (EC 1.10.3.-)	GO:0008827|cytochrome o ubiquinol oxidase activity;GO:0008827|cytochrome bo3 ubiquinol oxidase activity
Methylovulum miyakonense HT12	1.07885e+06	AQZU01000006	fig|1078846.3.peg.4010	1159599	1160738	1140	379	Cytochrome d ubiquinol oxidase subunit II (EC 1.10.3.-)	GO:0008827|cytochrome o ubiquinol oxidase activity;GO:0008827|cytochrome bo3 ubiquinol oxidase activity
Methylobacter luteus IMV-B-3098	1.09555e+06	ATYJ01000001	fig|1095552.3.peg.663	728076	729215	1140	379	Cytochrome d ubiquinol oxidase subunit II (EC 1.10.3.-)	GO:0006118|electron transport;GO:0016020|membrane
Methylomonas sp. MK1	1.13155e+06	AQOV01000001	fig|1131552.3.peg.215	249764	250903	1140	379	Cytochrome d ubiquinol oxidase subunit II (EC 1.10.3.-)	GO:0006118|electron transport;GO:0016020|membrane
Methylomonas sp. MK1	1.13155e+06	AQOV01000002	fig|1131552.3.peg.3605	241363	242454	1092	363	Cytochrome d ubiquinol oxidase subunit II (EC 1.10.3.-)	GO:0008827|cytochrome o ubiquinol oxidase activity;GO:0008827|cytochrome bo3 ubiquinol oxidase activity
Methylomonas sp. 11b	1.16817e+06	AZXK01000001	fig|1168169.3.peg.759	778264	779403	1140	379	Cytochrome d ubiquinol oxidase subunit II (EC 1.10.3.-)	GO:0006118|electron transport;GO:0016020|membrane
Methylomonas sp. 11b	1.16817e+06	AZXK01000002	fig|1168169.3.peg.2473	1460957	1462048	1092	363	Cytochrome d ubiquinol oxidase subunit II (EC 1.10.3.-)	GO:0008827|cytochrome o ubiquinol oxidase activity;GO:0008827|cytochrome bo3 ubiquinol oxidase activity
Methylomonas koyamae JCM 16701	1.29426e+06	BBCK01000021	fig|1294261.13.peg.2002	21823	21984	162	53	Cytochrome d ubiquinol oxidase subunit II (EC 1.10.3.-)	GO:0008827|cytochrome o ubiquinol oxidase activity;GO:0008827|cytochrome bo3 ubiquinol oxidase activity
Methylomonas koyamae JCM 16701	1.29426e+06	BBCK01000021	fig|1294261.13.peg.2003	21960	22868	909	302	Cytochrome d ubiquinol oxidase subunit II (EC 1.10.3.-)	GO:0008827|cytochrome o ubiquinol oxidase activity;GO:0008827|cytochrome bo3 ubiquinol oxidase activity
Methylomonas koyamae JCM 16701	1.29426e+06	BBCK01000054	fig|1294261.13.peg.3617	16359	16505	147	48	Cytochrome d ubiquinol oxidase subunit II (EC 1.10.3.-)	GO:0008827|cytochrome o ubiquinol oxidase activity;GO:0008827|cytochrome bo3 ubiquinol oxidase activity
Methylomonas koyamae JCM 16701	1.29426e+06	BBCK01000054	fig|1294261.13.peg.3618	16699	17496	798	265	Cytochrome d ubiquinol oxidase subunit II (EC 1.10.3.-)	GO:0008827|cytochrome o ubiquinol oxidase activity;GO:0008827|cytochrome bo3 ubiquinol oxidase activity
Methylogaea LK_2	1.29538e+06	1295378.4.con.0017	fig|1295378.4.peg.1055	1422	2438	1017	338	Cytochrome d ubiquinol oxidase subunit II (EC 1.10.3.-)	GO:0008827|cytochrome o ubiquinol oxidase activity;GO:0008827|cytochrome bo3 ubiquinol oxidase activity
Methylogaea LK_2	1.29538e+06	1295378.4.con.0043	fig|1295378.4.peg.2039	19759	20763	1005	334	Cytochrome d ubiquinol oxidase subunit II (EC 1.10.3.-)	GO:0008827|cytochrome o ubiquinol oxidase activity;GO:0008827|cytochrome bo3 ubiquinol oxidase activity
Methylogaea LK_2	1.29538e+06	1295378.4.con.0100	fig|1295378.4.peg.3111	3	1118	1116	372	Cytochrome d ubiquinol oxidase subunit II (EC 1.10.3.-)	GO:0008827|cytochrome o ubiquinol oxidase activity;GO:0008827|cytochrome bo3 ubiquinol oxidase activity
Methylogaea oryzae strain E10	1.29538e+06	AP019782	fig|1295382.3.peg.1924	2114214	2115353	1140	379	Cytochrome d ubiquinol oxidase subunit II (EC 1.10.3.-)	GO:0008827|cytochrome o ubiquinol oxidase activity;GO:0008827|cytochrome bo3 ubiquinol oxidase activity
Methylogaea oryzae strain E10	1.29538e+06	AP019782	fig|1295382.3.peg.935	958294	959310	1017	338	Cytochrome d ubiquinol oxidase subunit II (EC 1.10.3.-)	GO:0008827|cytochrome o ubiquinol oxidase activity;GO:0008827|cytochrome bo3 ubiquinol oxidase activity
Methylobacter tundripaludum 21/22	1.40845e+06	JMLA01000001	fig|1408450.3.peg.3216	3493659	3494669	1011	336	Cytochrome d ubiquinol oxidase subunit II (EC 1.10.3.-)	GO:0008827|cytochrome o ubiquinol oxidase activity;GO:0008827|cytochrome bo3 ubiquinol oxidase activity
Methylobacter tundripaludum 21/22	1.40845e+06	JMLA01000001	fig|1408450.3.peg.3312	3591309	3592448	1140	379	Cytochrome d ubiquinol oxidase subunit II (EC 1.10.3.-)	GO:0008827|cytochrome o ubiquinol oxidase activity;GO:0008827|cytochrome bo3 ubiquinol oxidase activity
Methylobacter tundripaludum 31/32	1.40845e+06	JPOH01000001	fig|1408451.3.peg.4309	4600307	4601317	1011	336	Cytochrome d ubiquinol oxidase subunit II (EC 1.10.3.-)	GO:0008827|cytochrome o ubiquinol oxidase activity;GO:0008827|cytochrome bo3 ubiquinol oxidase activity
Methylobacter tundripaludum 31/32	1.40845e+06	JPOH01000001	fig|1408451.3.peg.4469	4785417	4786556	1140	379	Cytochrome d ubiquinol oxidase subunit II (EC 1.10.3.-)	GO:0008827|cytochrome o ubiquinol oxidase activity;GO:0008827|cytochrome bo3 ubiquinol oxidase activity
Methyloterricola oryzae strain 73a	1.49505e+06	JYNS01000007	fig|1495050.5.peg.2258	1014	2150	1137	378	Cytochrome d ubiquinol oxidase subunit II (EC 1.10.3.-)	GO:0008827|cytochrome o ubiquinol oxidase activity;GO:0008827|cytochrome bo3 ubiquinol oxidase activity
Methylobacter sp. BBA5.1	1.49506e+06	JQKS01000018	fig|1495064.3.peg.2844	91677	92756	1080	359	Cytochrome d ubiquinol oxidase subunit II (EC 1.10.3.-)	GO:0008827|cytochrome o ubiquinol oxidase activity;GO:0008827|cytochrome bo3 ubiquinol oxidase activity
Methylocaldum sp. 175 strain 175	1.5281e+06	FXAM01000001	fig|1528100.4.peg.4505	3920447	3921583	1137	378	Cytochrome d ubiquinol oxidase subunit II (EC 1.10.3.-)	GO:0008827|cytochrome o ubiquinol oxidase activity;GO:0008827|cytochrome bo3 ubiquinol oxidase activity
Methylomonas denitrificans FJG1	1.53855e+06	JTDD01000011	fig|1538553.4.peg.828	82632	83723	1092	363	Cytochrome d ubiquinol oxidase subunit II (EC 1.10.3.-)	GO:0008827|cytochrome o ubiquinol oxidase activity;GO:0008827|cytochrome bo3 ubiquinol oxidase activity
Methylomonas denitrificans FJG1	1.53855e+06	JTDD01000068	fig|1538553.4.peg.3609	19856	20995	1140	379	Cytochrome d ubiquinol oxidase subunit II (EC 1.10.3.-)	GO:0008827|cytochrome o ubiquinol oxidase activity;GO:0008827|cytochrome bo3 ubiquinol oxidase activity
Methylomonas sp. Kb3	1.61154e+06	PIZT01000007	fig|1611544.3.peg.4098	45284	46375	1092	363	Cytochrome d ubiquinol oxidase subunit II (EC 1.10.3.-)	GO:0008827|cytochrome o ubiquinol oxidase activity;GO:0008827|cytochrome bo3 ubiquinol oxidase activity
Methylomonas sp. Kb3	1.61154e+06	PIZT01000010	fig|1611544.3.peg.3504	148914	150053	1140	379	Cytochrome d ubiquinol oxidase subunit II (EC 1.10.3.-)	GO:0008827|cytochrome o ubiquinol oxidase activity;GO:0008827|cytochrome bo3 ubiquinol oxidase activity
Methylomonas sp. DH-1	1.7272e+06	CP014360	fig|1727196.4.peg.4044	4154904	4156043	1140	379	Cytochrome d ubiquinol oxidase subunit II (EC 1.10.3.-)	GO:0008827|cytochrome o ubiquinol oxidase activity;GO:0008827|cytochrome bo3 ubiquinol oxidase activity
Methylomonas sp. DH-1	1.7272e+06	CP014360	fig|1727196.4.peg.633	638755	639843	1089	362	Cytochrome d ubiquinol oxidase subunit II (EC 1.10.3.-)	GO:0008827|cytochrome o ubiquinol oxidase activity;GO:0008827|cytochrome bo3 ubiquinol oxidase activity
Methylobacter tundripaludum Tobar13m-G39	173365	JAIPFK010000013	fig|173365.10.peg.1457	67175	68314	1140	379	Cytochrome d ubiquinol oxidase subunit II (EC 1.10.3.-)	GO:0008827|cytochrome o ubiquinol oxidase activity;GO:0008827|cytochrome bo3 ubiquinol oxidase activity
Methylobacter tundripaludum SO_2017_LW4 bin 69	173365	JALOCG010000001	fig|173365.13.peg.1374	184909	186048	1140	379	Cytochrome d ubiquinol oxidase subunit II (EC 1.10.3.-)	GO:0008827|cytochrome o ubiquinol oxidase activity;GO:0008827|cytochrome bo3 ubiquinol oxidase activity
Methylobacter tundripaludum strain OWC-G53F	173366	PTIY01000008	fig|173365.5.peg.2265	9609	10748	1140	379	Cytochrome d ubiquinol oxidase subunit II (EC 1.10.3.-)	GO:0008827|cytochrome o ubiquinol oxidase activity;GO:0008827|cytochrome bo3 ubiquinol oxidase activity
Methylobacter tundripaludum strain OWC-DMM	173366	PTIZ01000007	fig|173365.6.peg.3066	162086	163225	1140	379	Cytochrome d ubiquinol oxidase subunit II (EC 1.10.3.-)	GO:0008827|cytochrome o ubiquinol oxidase activity;GO:0008827|cytochrome bo3 ubiquinol oxidase activity
Methylobacter tundripaludum strain OWC-DMM	173366	PTIZ01000007	fig|173365.6.peg.2962	66135	67145	1011	336	Cytochrome d ubiquinol oxidase subunit II (EC 1.10.3.-)	GO:0008827|cytochrome o ubiquinol oxidase activity;GO:0008827|cytochrome bo3 ubiquinol oxidase activity
Methylomagnum ishizawai strain RS11D-Pr	1.76099e+06	AP019783	fig|1760988.4.peg.3738	3854944	3856080	1137	378	Cytochrome d ubiquinol oxidase subunit II (EC 1.10.3.-)	GO:0008827|cytochrome o ubiquinol oxidase activity;GO:0008827|cytochrome bo3 ubiquinol oxidase activity
Methylomonas sp. ZR1	1.79707e+06	RCST01000001	fig|1797072.3.peg.1693	1753089	1754228	1140	379	Cytochrome d ubiquinol oxidase subunit II (EC 1.10.3.-)	GO:0008827|cytochrome o ubiquinol oxidase activity;GO:0008827|cytochrome bo3 ubiquinol oxidase activity
Methylomonas sp. ZR1	1.79707e+06	RCST01000001	fig|1797072.3.peg.3500	3647895	3648986	1092	363	Cytochrome d ubiquinol oxidase subunit II (EC 1.10.3.-)	GO:0008827|cytochrome o ubiquinol oxidase activity;GO:0008827|cytochrome bo3 ubiquinol oxidase activity
Methylomonas sp. EbA	1.85456e+06	JACXSS010000001	fig|1854563.3.peg.1897	1929370	1930509	1140	379	Cytochrome d ubiquinol oxidase subunit II (EC 1.10.3.-)	GO:0008827|cytochrome o ubiquinol oxidase activity;GO:0008827|cytochrome bo3 ubiquinol oxidase activity
Methylomonas sp. EbA	1.85456e+06	JACXSS010000001	fig|1854563.3.peg.456	462128	463219	1092	363	Cytochrome d ubiquinol oxidase subunit II (EC 1.10.3.-)	GO:0008827|cytochrome o ubiquinol oxidase activity;GO:0008827|cytochrome bo3 ubiquinol oxidase activity
Methylomonas sp. EbB	1.85456e+06	JACXST010000001	fig|1854564.3.peg.95	97339	98430	1092	363	Cytochrome d ubiquinol oxidase subunit II (EC 1.10.3.-)	GO:0008827|cytochrome o ubiquinol oxidase activity;GO:0008827|cytochrome bo3 ubiquinol oxidase activity
Methylomonas sp. EbB	1.85456e+06	JACXST010000003	fig|1854564.3.peg.4419	671205	672344	1140	379	Cytochrome d ubiquinol oxidase subunit II (EC 1.10.3.-)	GO:0008827|cytochrome o ubiquinol oxidase activity;GO:0008827|cytochrome bo3 ubiquinol oxidase activity
Methylomonas sp. LWB	1.90585e+06	MKMC01000010	fig|1905845.3.peg.1199	81483	82622	1140	379	Cytochrome d ubiquinol oxidase subunit II (EC 1.10.3.-)	GO:0008827|cytochrome o ubiquinol oxidase activity;GO:0008827|cytochrome bo3 ubiquinol oxidase activity
Methylomonas sp. LWB	1.90585e+06	MKMC01000014	fig|1905845.3.peg.1961	61082	62155	1074	357	Cytochrome d ubiquinol oxidase subunit II (EC 1.10.3.-)	GO:0008827|cytochrome o ubiquinol oxidase activity;GO:0008827|cytochrome bo3 ubiquinol oxidase activity
Methylobacter sp. UBA2091	1.94686e+06	DCZF01000090	fig|1946861.3.peg.1269	6365	7504	1140	379	Cytochrome d ubiquinol oxidase subunit II (EC 1.10.3.-)	GO:0008827|cytochrome o ubiquinol oxidase activity;GO:0008827|cytochrome bo3 ubiquinol oxidase activity
Methylobacter sp. UBA2091	1.94686e+06	DCZF01000099	fig|1946861.3.peg.1313	11667	12677	1011	336	Cytochrome d ubiquinol oxidase subunit II (EC 1.10.3.-)	GO:0008827|cytochrome o ubiquinol oxidase activity;GO:0008827|cytochrome bo3 ubiquinol oxidase activity
Methylobacter sp. UBA6696	1.94686e+06	DKJI01000028	fig|1946862.3.peg.868	16508	17518	1011	336	Cytochrome d ubiquinol oxidase subunit II (EC 1.10.3.-)	GO:0008827|cytochrome o ubiquinol oxidase activity;GO:0008827|cytochrome bo3 ubiquinol oxidase activity
Methylobacter sp. UBA6696	1.94686e+06	DKJI01000089	fig|1946862.3.peg.1803	6309	7448	1140	379	Cytochrome d ubiquinol oxidase subunit II (EC 1.10.3.-)	GO:0008827|cytochrome o ubiquinol oxidase activity;GO:0008827|cytochrome bo3 ubiquinol oxidase activity
Methylobacter sp. UBA6712	1.94686e+06	DKIS01000001	fig|1946864.3.peg.2806	16655	17665	1011	336	Cytochrome d ubiquinol oxidase subunit II (EC 1.10.3.-)	GO:0008827|cytochrome o ubiquinol oxidase activity;GO:0008827|cytochrome bo3 ubiquinol oxidase activity
Methylobacter sp. UBA6712	1.94686e+06	DKIS01000102	fig|1946864.3.peg.3173	45998	47137	1140	379	Cytochrome d ubiquinol oxidase subunit II (EC 1.10.3.-)	GO:0008827|cytochrome o ubiquinol oxidase activity;GO:0008827|cytochrome bo3 ubiquinol oxidase activity
Methylobacter sp. strain FW305_bin.9	2.05196e+06	SCTW01000143	fig|2051955.10.peg.3654	60220	61233	1014	337	Cytochrome d ubiquinol oxidase subunit II (EC 1.10.3.-)	GO:0008827|cytochrome o ubiquinol oxidase activity;GO:0008827|cytochrome bo3 ubiquinol oxidase activity
Methylobacter sp. SO_2017_LW4 bin 67	2.05196e+06	JALOCF010000001	fig|2051955.20.peg.2146	53115	53237	123	40	Cytochrome d ubiquinol oxidase subunit II (EC 1.10.3.-)	GO:0008827|cytochrome o ubiquinol oxidase activity;GO:0008827|cytochrome bo3 ubiquinol oxidase activity
Methylobacter sp. SO_2017_LW4 bin 67	2.05196e+06	JALOCF010000012	fig|2051955.20.peg.4115	78637	79806	1170	389	Cytochrome d ubiquinol oxidase subunit II (EC 1.10.3.-)	GO:0008827|cytochrome o ubiquinol oxidase activity;GO:0008827|cytochrome bo3 ubiquinol oxidase activity
Methylobacter sp. SO_2017_GW1 bin 29	2.05196e+06	JALNYY010000055	fig|2051955.21.peg.4312	1942	3081	1140	379	Cytochrome d ubiquinol oxidase subunit II (EC 1.10.3.-)	GO:0008827|cytochrome o ubiquinol oxidase activity;GO:0008827|cytochrome bo3 ubiquinol oxidase activity
Methylobacter sp. B4-02	2.05196e+06	JAMJFP010000001	fig|2051955.22.peg.1101	194461	195600	1140	379	Cytochrome d ubiquinol oxidase subunit II (EC 1.10.3.-)	GO:0008827|cytochrome o ubiquinol oxidase activity;GO:0008827|cytochrome bo3 ubiquinol oxidase activity
Methylobacter sp. strain DP16D_bin.19	2.05196e+06	SCPZ01000071	fig|2051955.9.peg.2502	3306	4445	1140	379	Cytochrome d ubiquinol oxidase subunit II (EC 1.10.3.-)	GO:0008827|cytochrome o ubiquinol oxidase activity;GO:0008827|cytochrome bo3 ubiquinol oxidase activity
Methylococcus capsulatus str. Bath	243234	NC_002977	fig|243233.7.peg.1132	1162460	1163596	1137	378	Cytochrome d ubiquinol oxidase subunit II (EC 1.10.3.-)	GO:0008827|cytochrome o ubiquinol oxidase activity;GO:0008827|cytochrome bo3 ubiquinol oxidase activity
Methylobacter sp. KRF1	2.49775e+06	RYFG01000065	fig|2497749.3.peg.3907	18309	19448	1140	379	Cytochrome d ubiquinol oxidase subunit II (EC 1.10.3.-)	GO:0008827|cytochrome o ubiquinol oxidase activity;GO:0008827|cytochrome bo3 ubiquinol oxidase activity
Methylomonas sp. GJ1	2.60898e+06	CP043929	fig|2608981.3.peg.403	422827	423936	1110	369	Cytochrome d ubiquinol oxidase subunit II (EC 1.10.3.-)	GO:0008827|cytochrome o ubiquinol oxidase activity;GO:0008827|cytochrome bo3 ubiquinol oxidase activity
Methylomonas sp. GJ1	2.60898e+06	CP043929	fig|2608981.3.peg.548	568602	569741	1140	379	Cytochrome d ubiquinol oxidase subunit II (EC 1.10.3.-)	GO:0008827|cytochrome o ubiquinol oxidase activity;GO:0008827|cytochrome bo3 ubiquinol oxidase activity
Methylomicrobium alcaliphilum strain 20Z	271065	FO082060	fig|271065.3.peg.286	294273	295412	1140	379	Cytochrome d ubiquinol oxidase subunit II (EC 1.10.3.-)	GO:0006118|electron transport;GO:0016020|membrane
Methylomonas sp. LL1	2.78579e+06	CP064653	fig|2785785.3.peg.3663	3797924	3799057	1134	377	Cytochrome d ubiquinol oxidase subunit II (EC 1.10.3.-)	GO:0008827|cytochrome o ubiquinol oxidase activity;GO:0008827|cytochrome bo3 ubiquinol oxidase activity
Methylomonas sp. LL1	2.78579e+06	CP064653	fig|2785785.3.peg.4497	4618733	4619872	1140	379	Cytochrome d ubiquinol oxidase subunit II (EC 1.10.3.-)	GO:0008827|cytochrome o ubiquinol oxidase activity;GO:0008827|cytochrome bo3 ubiquinol oxidase activity
Methylomicrobium sp. RS1	2.80205e+06	JAERVK010000012	fig|2802053.3.peg.507	117279	118418	1140	379	Cytochrome d ubiquinol oxidase subunit II (EC 1.10.3.-)	GO:0008827|cytochrome o ubiquinol oxidase activity;GO:0008827|cytochrome bo3 ubiquinol oxidase activity
Methylomonas sp. EFPC1	2.81265e+06	CP070494	fig|2812647.3.peg.2626	2660437	2661576	1140	379	Cytochrome d ubiquinol oxidase subunit II (EC 1.10.3.-)	GO:0008827|cytochrome o ubiquinol oxidase activity;GO:0008827|cytochrome bo3 ubiquinol oxidase activity
Methylomonas sp. EFPC1	2.81265e+06	CP070494	fig|2812647.3.peg.509	517505	518596	1092	363	Cytochrome d ubiquinol oxidase subunit II (EC 1.10.3.-)	GO:0008827|cytochrome o ubiquinol oxidase activity;GO:0008827|cytochrome bo3 ubiquinol oxidase activity
Methylobacter whittenburyi strain ACM 3310	39770.3	JQNS01000005	fig|39770.3.peg.3581	1617417	1618556	1140	379	Cytochrome d ubiquinol oxidase subunit II (EC 1.10.3.-)	GO:0008827|cytochrome o ubiquinol oxidase activity;GO:0008827|cytochrome bo3 ubiquinol oxidase activity
Methylobacter whittenburyi strain UCM-B-3033	39770.6	JQNS01000005	fig|39770.6.peg.3795	1617417	1618556	1140	379	Cytochrome d ubiquinol oxidase subunit II (EC 1.10.3.-)	GO:0008827|cytochrome o ubiquinol oxidase activity;GO:0008827|cytochrome bo3 ubiquinol oxidase activity
Methylomicrobium agile strain ATCC 35068	39774.3	JPOJ01000001	fig|39774.3.peg.1850	1870905	1872044	1140	379	Cytochrome d ubiquinol oxidase subunit II (EC 1.10.3.-)	GO:0008827|cytochrome o ubiquinol oxidase activity;GO:0008827|cytochrome bo3 ubiquinol oxidase activity
Methylomicrobium agile strain ATCC 35068	39774.3	JPOJ01000001	fig|39774.3.peg.3706	3912925	3913266	342	113	Cytochrome d ubiquinol oxidase subunit II (EC 1.10.3.-)	GO:0008827|cytochrome o ubiquinol oxidase activity;GO:0008827|cytochrome bo3 ubiquinol oxidase activity
Methylomonas LK_5	416.38	416.38.con.0003	fig|416.38.peg.627	43042	44172	1131	376	Cytochrome d ubiquinol oxidase subunit II (EC 1.10.3.-)	GO:0008827|cytochrome o ubiquinol oxidase activity;GO:0008827|cytochrome bo3 ubiquinol oxidase activity
Methylomonas LK_5	416.38	416.38.con.0009	fig|416.38.peg.1556	17598	18737	1140	379	Cytochrome d ubiquinol oxidase subunit II (EC 1.10.3.-)	GO:0008827|cytochrome o ubiquinol oxidase activity;GO:0008827|cytochrome bo3 ubiquinol oxidase activity
Methylomonas LK_3	416.39	416.39.con.0015	fig|416.39.peg.1829	18102	19214	1113	370	Cytochrome d ubiquinol oxidase subunit II (EC 1.10.3.-)	GO:0008827|cytochrome o ubiquinol oxidase activity;GO:0008827|cytochrome bo3 ubiquinol oxidase activity
Methylomonas LK_3	416.39	416.39.con.0043	fig|416.39.peg.3252	15319	16458	1140	379	Cytochrome d ubiquinol oxidase subunit II (EC 1.10.3.-)	GO:0008827|cytochrome o ubiquinol oxidase activity;GO:0008827|cytochrome bo3 ubiquinol oxidase activity
Methylomonas LK_4	416.4	416.40.con.0001	fig|416.40.peg.673	667149	668288	1140	379	Cytochrome d ubiquinol oxidase subunit II (EC 1.10.3.-)	GO:0008827|cytochrome o ubiquinol oxidase activity;GO:0008827|cytochrome bo3 ubiquinol oxidase activity
Methylomonas LK_4	416.4	416.40.con.0003	fig|416.40.peg.1639	209625	210758	1134	377	Cytochrome d ubiquinol oxidase subunit II (EC 1.10.3.-)	GO:0008827|cytochrome o ubiquinol oxidase activity;GO:0008827|cytochrome bo3 ubiquinol oxidase activity
Methylomonas sp. SO_2017_LW3 bin 4	418.2	JALOBS010000008	fig|418.20.peg.646	47882	49021	1140	379	Cytochrome d ubiquinol oxidase subunit II (EC 1.10.3.-)	GO:0008827|cytochrome o ubiquinol oxidase activity;GO:0008827|cytochrome bo3 ubiquinol oxidase activity
Methylomonas sp. SO_2017_LW3 bin 4	418.2	JALOBS010000010	fig|418.20.peg.1247	139000	140142	1143	380	Cytochrome d ubiquinol oxidase subunit II (EC 1.10.3.-)	GO:0008827|cytochrome o ubiquinol oxidase activity;GO:0008827|cytochrome bo3 ubiquinol oxidase activity
Methylomonas sp. strain FW.007	418.6	PERU01000012	fig|418.6.peg.1935	58565	59695	1131	376	Cytochrome d ubiquinol oxidase subunit II (EC 1.10.3.-)	GO:0008827|cytochrome o ubiquinol oxidase activity;GO:0008827|cytochrome bo3 ubiquinol oxidase activity
Methylomonas sp. strain FW.007	418.6	PERU01000043	fig|418.6.peg.3627	16769	17908	1140	379	Cytochrome d ubiquinol oxidase subunit II (EC 1.10.3.-)	GO:0008827|cytochrome o ubiquinol oxidase activity;GO:0008827|cytochrome bo3 ubiquinol oxidase activity
Methylomonas methanica strain R-45363	421.17	LUUG01000050	fig|421.17.peg.1211	85024	86163	1140	379	Cytochrome d ubiquinol oxidase subunit II (EC 1.10.3.-)	GO:0008827|cytochrome o ubiquinol oxidase activity;GO:0008827|cytochrome bo3 ubiquinol oxidase activity
Methylomonas methanica strain R-45363	421.17	LUUG01000065	fig|421.17.peg.2279	35635	36726	1092	363	Cytochrome d ubiquinol oxidase subunit II (EC 1.10.3.-)	GO:0008827|cytochrome o ubiquinol oxidase activity;GO:0008827|cytochrome bo3 ubiquinol oxidase activity
Methylomonas methanica strain NCIMB 11130	421.18	LUUF01000043	fig|421.18.peg.1044	81937	83028	1092	363	Cytochrome d ubiquinol oxidase subunit II (EC 1.10.3.-)	GO:0008827|cytochrome o ubiquinol oxidase activity;GO:0008827|cytochrome bo3 ubiquinol oxidase activity
Methylomonas methanica strain NCIMB 11130	421.18	LUUF01000069	fig|421.18.peg.2559	23991	25130	1140	379	Cytochrome d ubiquinol oxidase subunit II (EC 1.10.3.-)	GO:0008827|cytochrome o ubiquinol oxidase activity;GO:0008827|cytochrome bo3 ubiquinol oxidase activity
Methylomonas methanica strain R-45371	421.19	LUUH01000024	fig|421.19.peg.626	9453	10544	1092	363	Cytochrome d ubiquinol oxidase subunit II (EC 1.10.3.-)	GO:0008827|cytochrome o ubiquinol oxidase activity;GO:0008827|cytochrome bo3 ubiquinol oxidase activity
Methylomonas methanica strain R-45371	421.19	LUUH01000087	fig|421.19.peg.4539	1609	2748	1140	379	Cytochrome d ubiquinol oxidase subunit II (EC 1.10.3.-)	GO:0008827|cytochrome o ubiquinol oxidase activity;GO:0008827|cytochrome bo3 ubiquinol oxidase activity
Methylomonas methanica strain S-1	421.26	SMCN01000007	fig|421.26.peg.2054	161970	163061	1092	363	Cytochrome d ubiquinol oxidase subunit II (EC 1.10.3.-)	GO:0008827|cytochrome o ubiquinol oxidase activity;GO:0008827|cytochrome bo3 ubiquinol oxidase activity
Methylomonas methanica strain S-1	421.26	SMCN01000026	fig|421.26.peg.4054	24067	25206	1140	379	Cytochrome d ubiquinol oxidase subunit II (EC 1.10.3.-)	GO:0008827|cytochrome o ubiquinol oxidase activity;GO:0008827|cytochrome bo3 ubiquinol oxidase activity
Methylobacter LK_1	429.13	429.13.con.0038	fig|429.13.peg.3493	9860	10999	1140	379	Cytochrome d ubiquinol oxidase subunit II (EC 1.10.3.-)	GO:0008827|cytochrome o ubiquinol oxidase activity;GO:0008827|cytochrome bo3 ubiquinol oxidase activity
Methylobacter marinus A45	674036	ARVS01000001	fig|674036.3.peg.557	596144	597283	1140	379	Cytochrome d ubiquinol oxidase subunit II (EC 1.10.3.-)	GO:0006118|electron transport;GO:0016020|membrane
Methylomicrobium album BG8	686341	CM001475	fig|686340.8.peg.2426	2494906	2495247	342	113	Cytochrome d ubiquinol oxidase subunit II (EC 1.10.3.-)	GO:0008827|cytochrome o ubiquinol oxidase activity;GO:0008827|cytochrome bo3 ubiquinol oxidase activity
Methylomicrobium album BG8	686341	CM001475	fig|686340.8.peg.415	411061	412200	1140	379	Cytochrome d ubiquinol oxidase subunit II (EC 1.10.3.-)	GO:0008827|cytochrome o ubiquinol oxidase activity;GO:0008827|cytochrome bo3 ubiquinol oxidase activity
Methylobacter tundripaludum SV96	697282	NZ_AEGW01000006	fig|697282.3.peg.2213	72212	73222	1011	336	Cytochrome d ubiquinol oxidase subunit II (EC 1.10.3.-)	GO:0006118|electron transport;GO:0016020|membrane
Methylobacter tundripaludum SV96	697282	NZ_AEGW01000018	fig|697282.3.peg.4102	46442	47581	1140	379	Cytochrome d ubiquinol oxidase subunit II (EC 1.10.3.-)	GO:0006118|electron transport;GO:0016020|membrane
Methylomonas koyamae strain R-45383	702114	LUUK01000026	fig|702114.13.peg.620	13051	14190	1140	379	Cytochrome d ubiquinol oxidase subunit II (EC 1.10.3.-)	GO:0008827|cytochrome o ubiquinol oxidase activity;GO:0008827|cytochrome bo3 ubiquinol oxidase activity
Methylomonas koyamae strain R-45383	702114	LUUK01000200	fig|702114.13.peg.4466	12311	13384	1074	357	Cytochrome d ubiquinol oxidase subunit II (EC 1.10.3.-)	GO:0008827|cytochrome o ubiquinol oxidase activity;GO:0008827|cytochrome bo3 ubiquinol oxidase activity
Methylomonas koyamae strain R-49807	702114	LUUL01000053	fig|702114.14.peg.979	18930	20069	1140	379	Cytochrome d ubiquinol oxidase subunit II (EC 1.10.3.-)	GO:0008827|cytochrome o ubiquinol oxidase activity;GO:0008827|cytochrome bo3 ubiquinol oxidase activity
Methylomonas koyamae strain R-49807	702114	LUUL01000055	fig|702114.14.peg.1127	27073	28161	1089	362	Cytochrome d ubiquinol oxidase subunit II (EC 1.10.3.-)	GO:0008827|cytochrome o ubiquinol oxidase activity;GO:0008827|cytochrome bo3 ubiquinol oxidase activity
Methylomonas koyamae strain R-45378	702114	LUUJ01000054	fig|702114.15.peg.1082	20761	21900	1140	379	Cytochrome d ubiquinol oxidase subunit II (EC 1.10.3.-)	GO:0008827|cytochrome o ubiquinol oxidase activity;GO:0008827|cytochrome bo3 ubiquinol oxidase activity
Methylomonas koyamae strain R-45378	702114	LUUJ01000086	fig|702114.15.peg.2638	27062	28150	1089	362	Cytochrome d ubiquinol oxidase subunit II (EC 1.10.3.-)	GO:0008827|cytochrome o ubiquinol oxidase activity;GO:0008827|cytochrome bo3 ubiquinol oxidase activity
Methylomonas koyamae strain LM6	702114	CP023669	fig|702114.17.peg.4089	4240058	4241197	1140	379	Cytochrome d ubiquinol oxidase subunit II (EC 1.10.3.-)	GO:0008827|cytochrome o ubiquinol oxidase activity;GO:0008827|cytochrome bo3 ubiquinol oxidase activity
Methylomonas koyamae strain LM6	702114	CP023669	fig|702114.17.peg.662	678845	679933	1089	362	Cytochrome d ubiquinol oxidase subunit II (EC 1.10.3.-)	GO:0008827|cytochrome o ubiquinol oxidase activity;GO:0008827|cytochrome bo3 ubiquinol oxidase activity
Methylomonas koyamae strain Fw12E-Y strain SM2	702114	PPPU01000005	fig|702114.21.peg.3657	122611	123699	1089	362	Cytochrome d ubiquinol oxidase subunit II (EC 1.10.3.-)	GO:0008827|cytochrome o ubiquinol oxidase activity;GO:0008827|cytochrome bo3 ubiquinol oxidase activity
Methylomonas koyamae strain Fw12E-Y strain SM2	702114	PPPU01000017	fig|702114.21.peg.1190	99462	100601	1140	379	Cytochrome d ubiquinol oxidase subunit II (EC 1.10.3.-)	GO:0008827|cytochrome o ubiquinol oxidase activity;GO:0008827|cytochrome bo3 ubiquinol oxidase activity
Methylomonas koyamae strain Fw12E-Y	702114	AP019777	fig|702114.23.peg.4054	4191098	4192237	1140	379	Cytochrome d ubiquinol oxidase subunit II (EC 1.10.3.-)	GO:0008827|cytochrome o ubiquinol oxidase activity;GO:0008827|cytochrome bo3 ubiquinol oxidase activity
Methylomonas koyamae strain Fw12E-Y	702114	AP019777	fig|702114.23.peg.611	608549	609637	1089	362	Cytochrome d ubiquinol oxidase subunit II (EC 1.10.3.-)	GO:0008827|cytochrome o ubiquinol oxidase activity;GO:0008827|cytochrome bo3 ubiquinol oxidase activity
Methylomonas methanica MC09	857087	NC_015572	fig|857087.3.peg.3372	3646950	3648089	1140	379	Cytochrome d ubiquinol oxidase subunit II (EC 1.10.3.-)	GO:0006118|electron transport;GO:0016020|membrane
Methylomonas methanica MC09	857087	NC_015572	fig|857087.3.peg.4329	4687068	4688204	1137	378	Cytochrome d ubiquinol oxidase subunit II (EC 1.10.3.-)	GO:0008827|cytochrome o ubiquinol oxidase activity;GO:0008827|cytochrome bo3 ubiquinol oxidase activity
Methylomonas lenta strain R-45370	980561	LUUI01000127	fig|980561.3.peg.3405	14615	15754	1140	379	Cytochrome d ubiquinol oxidase subunit II (EC 1.10.3.-)	GO:0008827|cytochrome o ubiquinol oxidase activity;GO:0008827|cytochrome bo3 ubiquinol oxidase activity
Methylomonas lenta strain R-45370	980561	LUUI01000143	fig|980561.3.peg.3820	28963	30093	1131	376	Cytochrome d ubiquinol oxidase subunit II (EC 1.10.3.-)	GO:0008827|cytochrome o ubiquinol oxidase activity;GO:0008827|cytochrome bo3 ubiquinol oxidase activity
Methylomonas sp. LW13	107637	JNLB01000003	fig|107637.3.peg.1277	227140	227295	156	51	Cytochrome d ubiquinol oxidase subunit X (EC 1.10.3.-)	GO:0008827|cytochrome o ubiquinol oxidase activity;GO:0008827|cytochrome bo3 ubiquinol oxidase activity
Methylovulum miyakonense HT12	1.07885e+06	AQZU01000006	fig|1078846.3.peg.4009	1159436	1159588	153	50	Cytochrome d ubiquinol oxidase subunit X (EC 1.10.3.-)	GO:0008827|cytochrome o ubiquinol oxidase activity;GO:0008827|cytochrome bo3 ubiquinol oxidase activity
Methylomonas sp. MK1	1.13155e+06	AQOV01000001	fig|1131552.3.peg.214	249597	249752	156	51	Cytochrome d ubiquinol oxidase subunit X (EC 1.10.3.-)	GO:0008827|cytochrome o ubiquinol oxidase activity;GO:0008827|cytochrome bo3 ubiquinol oxidase activity
Methylomonas sp. 11b	1.16817e+06	AZXK01000001	fig|1168169.3.peg.758	778097	778252	156	51	Cytochrome d ubiquinol oxidase subunit X (EC 1.10.3.-)	GO:0008827|cytochrome o ubiquinol oxidase activity;GO:0008827|cytochrome bo3 ubiquinol oxidase activity
Methylomonas koyamae JCM 16701	1.29426e+06	BBCK01000054	fig|1294261.13.peg.3619	17509	17643	135	44	Cytochrome d ubiquinol oxidase subunit X (EC 1.10.3.-)	GO:0008827|cytochrome o ubiquinol oxidase activity;GO:0008827|cytochrome bo3 ubiquinol oxidase activity
Methylogaea LK_2	1.29538e+06	1295378.4.con.0158	fig|1295378.4.peg.3586	94	237	144	47	Cytochrome d ubiquinol oxidase subunit X (EC 1.10.3.-)	GO:0008827|cytochrome o ubiquinol oxidase activity;GO:0008827|cytochrome bo3 ubiquinol oxidase activity
Methylogaea oryzae strain E10	1.29538e+06	AP019782	fig|1295382.3.peg.1925	2115369	2115512	144	47	Cytochrome d ubiquinol oxidase subunit X (EC 1.10.3.-)	GO:0008827|cytochrome o ubiquinol oxidase activity;GO:0008827|cytochrome bo3 ubiquinol oxidase activity
Methylobacter tundripaludum 21/22	1.40845e+06	JMLA01000001	fig|1408450.3.peg.3311	3590730	3591299	570	189	Cytochrome d ubiquinol oxidase subunit X (EC 1.10.3.-)	GO:0008827|cytochrome o ubiquinol oxidase activity;GO:0008827|cytochrome bo3 ubiquinol oxidase activity
Methylobacter tundripaludum 31/32	1.40845e+06	JPOH01000001	fig|1408451.3.peg.4468	4784838	4785407	570	189	Cytochrome d ubiquinol oxidase subunit X (EC 1.10.3.-)	GO:0008827|cytochrome o ubiquinol oxidase activity;GO:0008827|cytochrome bo3 ubiquinol oxidase activity
Methyloterricola oryzae strain 73a	1.49505e+06	JYNS01000007	fig|1495050.5.peg.2257	855	998	144	47	Cytochrome d ubiquinol oxidase subunit X (EC 1.10.3.-)	GO:0008827|cytochrome o ubiquinol oxidase activity;GO:0008827|cytochrome bo3 ubiquinol oxidase activity
Methylobacter sp. BBA5.1	1.49506e+06	JQKS01000018	fig|1495064.3.peg.2843	91520	91663	144	47	Cytochrome d ubiquinol oxidase subunit X (EC 1.10.3.-)	GO:0008827|cytochrome o ubiquinol oxidase activity;GO:0008827|cytochrome bo3 ubiquinol oxidase activity
Methylocaldum sp. 175 strain 175	1.5281e+06	FXAM01000001	fig|1528100.4.peg.4506	3921596	3921739	144	47	Cytochrome d ubiquinol oxidase subunit X (EC 1.10.3.-)	GO:0008827|cytochrome o ubiquinol oxidase activity;GO:0008827|cytochrome bo3 ubiquinol oxidase activity
Methylomonas denitrificans FJG1	1.53855e+06	JTDD01000068	fig|1538553.4.peg.3608	19689	19844	156	51	Cytochrome d ubiquinol oxidase subunit X (EC 1.10.3.-)	GO:0008827|cytochrome o ubiquinol oxidase activity;GO:0008827|cytochrome bo3 ubiquinol oxidase activity
Methylomonas sp. Kb3	1.61154e+06	PIZT01000010	fig|1611544.3.peg.3505	150065	150220	156	51	Cytochrome d ubiquinol oxidase subunit X (EC 1.10.3.-)	GO:0008827|cytochrome o ubiquinol oxidase activity;GO:0008827|cytochrome bo3 ubiquinol oxidase activity
Methylomonas sp. DH-1	1.7272e+06	CP014360	fig|1727196.4.peg.4043	4154757	4154891	135	44	Cytochrome d ubiquinol oxidase subunit X (EC 1.10.3.-)	GO:0008827|cytochrome o ubiquinol oxidase activity;GO:0008827|cytochrome bo3 ubiquinol oxidase activity
Methylobacter tundripaludum Tobar13m-G39	173365	JAIPFK010000013	fig|173365.10.peg.1456	66599	67165	567	188	Cytochrome d ubiquinol oxidase subunit X (EC 1.10.3.-)	GO:0008827|cytochrome o ubiquinol oxidase activity;GO:0008827|cytochrome bo3 ubiquinol oxidase activity
Methylobacter tundripaludum SO_2017_LW4 bin 69	173365	JALOCG010000001	fig|173365.13.peg.1373	184333	184899	567	188	Cytochrome d ubiquinol oxidase subunit X (EC 1.10.3.-)	GO:0008827|cytochrome o ubiquinol oxidase activity;GO:0008827|cytochrome bo3 ubiquinol oxidase activity
Methylobacter tundripaludum strain OWC-G53F	173366	PTIY01000008	fig|173365.5.peg.2266	10758	11324	567	188	Cytochrome d ubiquinol oxidase subunit X (EC 1.10.3.-)	GO:0008827|cytochrome o ubiquinol oxidase activity;GO:0008827|cytochrome bo3 ubiquinol oxidase activity
Methylobacter tundripaludum strain OWC-DMM	173366	PTIZ01000007	fig|173365.6.peg.3065	161510	162076	567	188	Cytochrome d ubiquinol oxidase subunit X (EC 1.10.3.-)	GO:0008827|cytochrome o ubiquinol oxidase activity;GO:0008827|cytochrome bo3 ubiquinol oxidase activity
Methylomagnum ishizawai strain RS11D-Pr	1.76099e+06	AP019783	fig|1760988.4.peg.3739	3856093	3856236	144	47	Cytochrome d ubiquinol oxidase subunit X (EC 1.10.3.-)	GO:0008827|cytochrome o ubiquinol oxidase activity;GO:0008827|cytochrome bo3 ubiquinol oxidase activity
Methylomonas sp. ZR1	1.79707e+06	RCST01000001	fig|1797072.3.peg.1692	1752922	1753077	156	51	Cytochrome d ubiquinol oxidase subunit X (EC 1.10.3.-)	GO:0008827|cytochrome o ubiquinol oxidase activity;GO:0008827|cytochrome bo3 ubiquinol oxidase activity
Methylomonas sp. EbA	1.85456e+06	JACXSS010000001	fig|1854563.3.peg.1898	1930521	1930676	156	51	Cytochrome d ubiquinol oxidase subunit X (EC 1.10.3.-)	GO:0008827|cytochrome o ubiquinol oxidase activity;GO:0008827|cytochrome bo3 ubiquinol oxidase activity
Methylomonas sp. EbB	1.85456e+06	JACXST010000003	fig|1854564.3.peg.4418	671038	671193	156	51	Cytochrome d ubiquinol oxidase subunit X (EC 1.10.3.-)	GO:0008827|cytochrome o ubiquinol oxidase activity;GO:0008827|cytochrome bo3 ubiquinol oxidase activity
Methylomonas sp. LWB	1.90585e+06	MKMC01000010	fig|1905845.3.peg.1200	82637	82780	144	47	Cytochrome d ubiquinol oxidase subunit X (EC 1.10.3.-)	GO:0008827|cytochrome o ubiquinol oxidase activity;GO:0008827|cytochrome bo3 ubiquinol oxidase activity
Methylobacter sp. UBA2091	1.94686e+06	DCZF01000090	fig|1946861.3.peg.1268	5789	6355	567	188	Cytochrome d ubiquinol oxidase subunit X (EC 1.10.3.-)	GO:0008827|cytochrome o ubiquinol oxidase activity;GO:0008827|cytochrome bo3 ubiquinol oxidase activity
Methylobacter sp. UBA6696	1.94686e+06	DKJI01000089	fig|1946862.3.peg.1802	5733	6299	567	188	Cytochrome d ubiquinol oxidase subunit X (EC 1.10.3.-)	GO:0008827|cytochrome o ubiquinol oxidase activity;GO:0008827|cytochrome bo3 ubiquinol oxidase activity
Methylobacter sp. UBA6712	1.94686e+06	DKIS01000102	fig|1946864.3.peg.3174	47147	47716	570	189	Cytochrome d ubiquinol oxidase subunit X (EC 1.10.3.-)	GO:0008827|cytochrome o ubiquinol oxidase activity;GO:0008827|cytochrome bo3 ubiquinol oxidase activity
Methylobacter sp. SO_2017_LW4 bin 67	2.05196e+06	JALOCF010000012	fig|2051955.20.peg.4116	79816	80388	573	190	Cytochrome d ubiquinol oxidase subunit X (EC 1.10.3.-)	GO:0008827|cytochrome o ubiquinol oxidase activity;GO:0008827|cytochrome bo3 ubiquinol oxidase activity
Methylobacter sp. SO_2017_GW1 bin 29	2.05196e+06	JALNYY010000055	fig|2051955.21.peg.4311	1360	1932	573	190	Cytochrome d ubiquinol oxidase subunit X (EC 1.10.3.-)	GO:0008827|cytochrome o ubiquinol oxidase activity;GO:0008827|cytochrome bo3 ubiquinol oxidase activity
Methylobacter sp. B4-02	2.05196e+06	JAMJFP010000001	fig|2051955.22.peg.1102	195614	195757	144	47	Cytochrome d ubiquinol oxidase subunit X (EC 1.10.3.-)	GO:0008827|cytochrome o ubiquinol oxidase activity;GO:0008827|cytochrome bo3 ubiquinol oxidase activity
Methylobacter sp. strain DP16D_bin.19	2.05196e+06	SCPZ01000071	fig|2051955.9.peg.2501	2727	3296	570	189	Cytochrome d ubiquinol oxidase subunit X (EC 1.10.3.-)	GO:0008827|cytochrome o ubiquinol oxidase activity;GO:0008827|cytochrome bo3 ubiquinol oxidase activity
Methylococcus capsulatus str. Bath	243234	NC_002977	fig|243233.7.peg.1133	1163628	1163750	123	40	Cytochrome d ubiquinol oxidase subunit X (EC 1.10.3.-)	GO:0008827|cytochrome o ubiquinol oxidase activity;GO:0008827|cytochrome bo3 ubiquinol oxidase activity
Methylobacter sp. KRF1	2.49775e+06	RYFG01000065	fig|2497749.3.peg.3906	17727	18299	573	190	Cytochrome d ubiquinol oxidase subunit X (EC 1.10.3.-)	GO:0008827|cytochrome o ubiquinol oxidase activity;GO:0008827|cytochrome bo3 ubiquinol oxidase activity
Methylomonas sp. GJ1	2.60898e+06	CP043929	fig|2608981.3.peg.549	569753	569893	141	46	Cytochrome d ubiquinol oxidase subunit X (EC 1.10.3.-)	GO:0008827|cytochrome o ubiquinol oxidase activity;GO:0008827|cytochrome bo3 ubiquinol oxidase activity
Methylomicrobium alcaliphilum strain 20Z	271065	FO082060	fig|271065.3.peg.287	295737	295880	144	47	Cytochrome d ubiquinol oxidase subunit X (EC 1.10.3.-)	GO:0008827|cytochrome o ubiquinol oxidase activity;GO:0008827|cytochrome bo3 ubiquinol oxidase activity
Methylomonas sp. LL1	2.78579e+06	CP064653	fig|2785785.3.peg.4498	4619884	4620027	144	47	Cytochrome d ubiquinol oxidase subunit X (EC 1.10.3.-)	GO:0008827|cytochrome o ubiquinol oxidase activity;GO:0008827|cytochrome bo3 ubiquinol oxidase activity
Methylomonas sp. EFPC1	2.81265e+06	CP070494	fig|2812647.3.peg.2625	2660270	2660425	156	51	Cytochrome d ubiquinol oxidase subunit X (EC 1.10.3.-)	GO:0008827|cytochrome o ubiquinol oxidase activity;GO:0008827|cytochrome bo3 ubiquinol oxidase activity
Methylobacter whittenburyi strain ACM 3310	39770.3	JQNS01000005	fig|39770.3.peg.3582	1618570	1618713	144	47	Cytochrome d ubiquinol oxidase subunit X (EC 1.10.3.-)	GO:0008827|cytochrome o ubiquinol oxidase activity;GO:0008827|cytochrome bo3 ubiquinol oxidase activity
Methylobacter whittenburyi strain UCM-B-3033	39770.6	JQNS01000005	fig|39770.6.peg.3796	1618570	1618713	144	47	Cytochrome d ubiquinol oxidase subunit X (EC 1.10.3.-)	GO:0008827|cytochrome o ubiquinol oxidase activity;GO:0008827|cytochrome bo3 ubiquinol oxidase activity
Methylomonas LK_5	416.38	416.38.con.0009	fig|416.38.peg.1557	18749	18904	156	51	Cytochrome d ubiquinol oxidase subunit X (EC 1.10.3.-)	GO:0008827|cytochrome o ubiquinol oxidase activity;GO:0008827|cytochrome bo3 ubiquinol oxidase activity
Methylomonas LK_3	416.39	416.39.con.0043	fig|416.39.peg.3253	16470	16619	150	49	Cytochrome d ubiquinol oxidase subunit X (EC 1.10.3.-)	GO:0008827|cytochrome o ubiquinol oxidase activity;GO:0008827|cytochrome bo3 ubiquinol oxidase activity
Methylomonas LK_4	416.4	416.40.con.0001	fig|416.40.peg.672	666982	667137	156	51	Cytochrome d ubiquinol oxidase subunit X (EC 1.10.3.-)	GO:0008827|cytochrome o ubiquinol oxidase activity;GO:0008827|cytochrome bo3 ubiquinol oxidase activity
Methylomonas sp. SO_2017_LW3 bin 4	418.2	JALOBS010000008	fig|418.20.peg.645	47728	47871	144	47	Cytochrome d ubiquinol oxidase subunit X (EC 1.10.3.-)	GO:0008827|cytochrome o ubiquinol oxidase activity;GO:0008827|cytochrome bo3 ubiquinol oxidase activity
Methylomonas sp. strain FW.007	418.6	PERU01000043	fig|418.6.peg.3626	16602	16757	156	51	Cytochrome d ubiquinol oxidase subunit X (EC 1.10.3.-)	GO:0008827|cytochrome o ubiquinol oxidase activity;GO:0008827|cytochrome bo3 ubiquinol oxidase activity
Methylomonas methanica strain R-45363	421.17	LUUG01000050	fig|421.17.peg.1210	84857	85012	156	51	Cytochrome d ubiquinol oxidase subunit X (EC 1.10.3.-)	GO:0008827|cytochrome o ubiquinol oxidase activity;GO:0008827|cytochrome bo3 ubiquinol oxidase activity
Methylomonas methanica strain NCIMB 11130	421.18	LUUF01000069	fig|421.18.peg.2560	25142	25297	156	51	Cytochrome d ubiquinol oxidase subunit X (EC 1.10.3.-)	GO:0008827|cytochrome o ubiquinol oxidase activity;GO:0008827|cytochrome bo3 ubiquinol oxidase activity
Methylomonas methanica strain R-45371	421.19	LUUH01000087	fig|421.19.peg.4540	2760	2915	156	51	Cytochrome d ubiquinol oxidase subunit X (EC 1.10.3.-)	GO:0008827|cytochrome o ubiquinol oxidase activity;GO:0008827|cytochrome bo3 ubiquinol oxidase activity
Methylomonas methanica strain S-1	421.26	SMCN01000026	fig|421.26.peg.4055	25218	25373	156	51	Cytochrome d ubiquinol oxidase subunit X (EC 1.10.3.-)	GO:0008827|cytochrome o ubiquinol oxidase activity;GO:0008827|cytochrome bo3 ubiquinol oxidase activity
Methylobacter LK_1	429.13	429.13.con.0038	fig|429.13.peg.3492	9281	9850	570	189	Cytochrome d ubiquinol oxidase subunit X (EC 1.10.3.-)	GO:0008827|cytochrome o ubiquinol oxidase activity;GO:0008827|cytochrome bo3 ubiquinol oxidase activity
Methylobacter marinus A45	674036	ARVS01000001	fig|674036.3.peg.556	595987	596130	144	47	Cytochrome d ubiquinol oxidase subunit X (EC 1.10.3.-)	GO:0008827|cytochrome o ubiquinol oxidase activity;GO:0008827|cytochrome bo3 ubiquinol oxidase activity
Methylomicrobium buryatense 5G	675511	AOTL01000013	fig|675511.3.peg.2868	967430	967573	144	47	Cytochrome d ubiquinol oxidase subunit X (EC 1.10.3.-)	GO:0008827|cytochrome o ubiquinol oxidase activity;GO:0008827|cytochrome bo3 ubiquinol oxidase activity
Methylobacter tundripaludum SV96	697282	NZ_AEGW01000018	fig|697282.3.peg.4103	47591	48160	570	189	Cytochrome d ubiquinol oxidase subunit X (EC 1.10.3.-)	GO:0008827|cytochrome o ubiquinol oxidase activity;GO:0008827|cytochrome bo3 ubiquinol oxidase activity
Methylomonas koyamae strain R-45383	702114	LUUK01000026	fig|702114.13.peg.621	14205	14348	144	47	Cytochrome d ubiquinol oxidase subunit X (EC 1.10.3.-)	GO:0008827|cytochrome o ubiquinol oxidase activity;GO:0008827|cytochrome bo3 ubiquinol oxidase activity
Methylomonas koyamae strain R-49807	702114	LUUL01000053	fig|702114.14.peg.980	20082	20216	135	44	Cytochrome d ubiquinol oxidase subunit X (EC 1.10.3.-)	GO:0008827|cytochrome o ubiquinol oxidase activity;GO:0008827|cytochrome bo3 ubiquinol oxidase activity
Methylomonas koyamae strain R-45378	702114	LUUJ01000054	fig|702114.15.peg.1083	21913	22047	135	44	Cytochrome d ubiquinol oxidase subunit X (EC 1.10.3.-)	GO:0008827|cytochrome o ubiquinol oxidase activity;GO:0008827|cytochrome bo3 ubiquinol oxidase activity
Methylomonas koyamae strain LM6	702114	CP023669	fig|702114.17.peg.4088	4239911	4240045	135	44	Cytochrome d ubiquinol oxidase subunit X (EC 1.10.3.-)	GO:0008827|cytochrome o ubiquinol oxidase activity;GO:0008827|cytochrome bo3 ubiquinol oxidase activity
Methylomonas koyamae strain Fw12E-Y strain SM2	702114	PPPU01000017	fig|702114.21.peg.1189	99315	99449	135	44	Cytochrome d ubiquinol oxidase subunit X (EC 1.10.3.-)	GO:0008827|cytochrome o ubiquinol oxidase activity;GO:0008827|cytochrome bo3 ubiquinol oxidase activity
Methylomonas koyamae strain Fw12E-Y	702114	AP019777	fig|702114.23.peg.4053	4190951	4191085	135	44	Cytochrome d ubiquinol oxidase subunit X (EC 1.10.3.-)	GO:0008827|cytochrome o ubiquinol oxidase activity;GO:0008827|cytochrome bo3 ubiquinol oxidase activity
Methylomonas methanica MC09	857087	NC_015572	fig|857087.3.peg.3371	3646796	3646939	144	47	Cytochrome d ubiquinol oxidase subunit X (EC 1.10.3.-)	GO:0008827|cytochrome o ubiquinol oxidase activity;GO:0008827|cytochrome bo3 ubiquinol oxidase activity
Methylomonas lenta strain R-45370	980561	LUUI01000127	fig|980561.3.peg.3404	14447	14602	156	51	Cytochrome d ubiquinol oxidase subunit X (EC 1.10.3.-)	GO:0008827|cytochrome o ubiquinol oxidase activity;GO:0008827|cytochrome bo3 ubiquinol oxidase activity
Methylomonas sp. LW13	107637	JNLB01000004	fig|107637.3.peg.1529	116411	116806	396	131	Hemerythrin domain protein
Methylovulum miyakonense HT12	1.07885e+06	AQZU01000009	fig|1078846.3.peg.4654	377633	378031	399	132	Hemerythrin domain protein
Methylobacter luteus IMV-B-3098	1.09555e+06	ATYJ01000003	fig|1095552.3.peg.3198	880433	880831	399	132	Hemerythrin domain protein
Methylococcaceae bacterium KoM1	1.11647e+06	AYLO01000015	fig|1116472.3.peg.558	60927	61325	399	132	Hemerythrin domain protein
Methylomonas sp. MK1	1.13155e+06	AQOV01000001	fig|1131552.3.peg.1069	1158602	1158997	396	131	Hemerythrin domain protein
Methylomonas sp. 11b	1.16817e+06	AZXK01000002	fig|1168169.3.peg.4982	4092312	4092707	396	131	Hemerythrin domain protein
Methylomonas koyamae JCM 16701	1.29426e+06	BBCK01000020	fig|1294261.13.peg.1935	38927	39307	381	126	Hemerythrin domain protein
Methylogaea LK_2	1.29538e+06	1295378.4.con.0009	fig|1295378.4.peg.618	14021	14416	396	131	Hemerythrin domain protein
Methylobacter tundripaludum 21/22	1.40845e+06	JMLA01000001	fig|1408450.3.peg.2669	2919458	2919856	399	132	Hemerythrin domain protein
Methylobacter tundripaludum 31/32	1.40845e+06	JPOH01000001	fig|1408451.3.peg.3688	3993465	3993863	399	132	Hemerythrin domain protein
Methylobacter sp. BBA5.1	1.49506e+06	JQKS01000016	fig|1495064.3.peg.2533	54295	54693	399	132	Hemerythrin domain protein
Methylomonas denitrificans FJG1	1.53855e+06	JTDD01000080	fig|1538553.4.peg.3844	19144	19539	396	131	Hemerythrin domain protein
Methylomonas sp. Kb3	1.61154e+06	PIZT01000006	fig|1611544.3.peg.4475	176109	176504	396	131	Hemerythrin domain protein
Methylomonas sp. DH-1	1.7272e+06	CP014360	fig|1727196.4.peg.1800	1782142	1782537	396	131	Hemerythrin domain protein
Methylobacter tundripaludum Tobar13m-G39	173365	JAIPFK010000004	fig|173365.10.peg.61	68848	69246	399	132	Hemerythrin domain protein
Methylobacter tundripaludum SO_2017_LW4 bin 69	173365	JALOCG010000046	fig|173365.13.peg.2194	17910	18308	399	132	Hemerythrin domain protein
Methylobacter tundripaludum strain OWC-G53F	173366	PTIY01000015	fig|173365.5.peg.3413	61352	61750	399	132	Hemerythrin domain protein
Methylobacter tundripaludum strain OWC-DMM	173366	PTIZ01000010	fig|173365.6.peg.3702	104533	104931	399	132	Hemerythrin domain protein
Methylomonas sp. ZR1	1.79707e+06	RCST01000001	fig|1797072.3.peg.2001	2093401	2093796	396	131	Hemerythrin domain protein
Methylomonas sp. EbA	1.85456e+06	JACXSS010000001	fig|1854563.3.peg.2988	2995733	2996128	396	131	Hemerythrin domain protein
Methylomonas sp. EbB	1.85456e+06	JACXST010000003	fig|1854564.3.peg.4872	1105536	1105931	396	131	Hemerythrin domain protein
Methylomonas sp. LWB	1.90585e+06	MKMC01000023	fig|1905845.3.peg.2785	390332	390727	396	131	Hemerythrin domain protein
Methylobacter sp. UBA6696	1.94686e+06	DKJI01000040	fig|1946862.3.peg.3111	4284	4682	399	132	Hemerythrin domain protein
Methylobacter sp. UBA6712	1.94686e+06	DKIS01000090	fig|1946864.3.peg.1557	3582	3980	399	132	Hemerythrin domain protein
Methylobacter sp. strain FW305_bin.9	2.05196e+06	SCTW01000105	fig|2051955.10.peg.2481	3365	3763	399	132	Hemerythrin domain protein
Methylobacter sp. SO_2017_LW4 bin 67	2.05196e+06	JALOCF010000003	fig|2051955.20.peg.2593	121203	121601	399	132	Hemerythrin domain protein
Methylobacter sp. SO_2017_GW1 bin 29	2.05196e+06	JALNYY010000179	fig|2051955.21.peg.2414	4510	4908	399	132	Hemerythrin domain protein
Methylobacter sp. B4-02	2.05196e+06	JAMJFP010000009	fig|2051955.22.peg.4785	99305	99703	399	132	Hemerythrin domain protein
Methylobacter sp. LH_M5	2.05196e+06	JAGXGY010000042	fig|2051955.23.peg.2632	148186	148584	399	132	Hemerythrin domain protein
Methylobacter sp. strain DP16D_bin.19	2.05196e+06	SCPZ01000096	fig|2051955.9.peg.3278	55827	56225	399	132	Hemerythrin domain protein
Methylococcus capsulatus str. Bath	243234	NC_002977	fig|243233.7.peg.732	754621	755016	396	131	Hemerythrin domain protein
Methylobacter sp. KRF1	2.49775e+06	RYFG01000059	fig|2497749.3.peg.3727	8313	8711	399	132	Hemerythrin domain protein
Methylomonas sp. GJ1	2.60898e+06	CP043929	fig|2608981.3.peg.2903	3037369	3037764	396	131	Hemerythrin domain protein
Methylomicrobium alcaliphilum strain 20Z	271065	FO082060	fig|271065.3.peg.2379	2642628	2643023	396	131	Hemerythrin domain protein
Methylomonas sp. LL1	2.78579e+06	CP064653	fig|2785785.3.peg.2163	2272270	2272665	396	131	Hemerythrin domain protein
Methylomicrobium sp. RS1	2.80205e+06	JAERVK010000008	fig|2802053.3.peg.4460	192635	193030	396	131	Hemerythrin domain protein
Methylomonas sp. EFPC1	2.81265e+06	CP070494	fig|2812647.3.peg.2878	2940641	2941036	396	131	Hemerythrin domain protein
Methylobacter whittenburyi strain ACM 3310	39770.3	JQNS01000007	fig|39770.3.peg.5041	1425223	1425621	399	132	Hemerythrin domain protein
Methylobacter whittenburyi strain UCM-B-3033	39770.6	JQNS01000007	fig|39770.6.peg.5315	1425223	1425621	399	132	Hemerythrin domain protein
Methylomicrobium agile strain ATCC 35068	39774.3	JPOJ01000001	fig|39774.3.peg.3546	3726742	3727137	396	131	Hemerythrin domain protein
Methylomonas LK_5	416.38	416.38.con.0043	fig|416.38.peg.3780	446	841	396	131	Hemerythrin domain protein
Methylomonas LK_3	416.39	416.39.con.0008	fig|416.39.peg.1239	75976	76371	396	131	Hemerythrin domain protein
Methylomonas LK_4	416.4	416.40.con.0001	fig|416.40.peg.519	538629	539024	396	131	Hemerythrin domain protein
Methylomonas sp. SO_2017_LW3 bin 4	418.2	JALOBS010000009	fig|418.20.peg.1022	90588	90983	396	131	Hemerythrin domain protein
Methylomonas sp. strain FW.007	418.6	PERU01000001	fig|418.6.peg.62	59235	59630	396	131	Hemerythrin domain protein
Methylomonas methanica strain R-45363	421.17	LUUG01000070	fig|421.17.peg.2455	77403	77798	396	131	Hemerythrin domain protein
Methylomonas methanica strain NCIMB 11130	421.18	LUUF01000035	fig|421.18.peg.59	58421	58816	396	131	Hemerythrin domain protein
Methylomonas methanica strain R-45371	421.19	LUUH01000061	fig|421.19.peg.2814	27132	27527	396	131	Hemerythrin domain protein
Methylomonas methanica strain S-1	421.26	SMCN01000017	fig|421.26.peg.3380	19195	19590	396	131	Hemerythrin domain protein
Methylobacter LK_1	429.13	429.13.con.0008	fig|429.13.peg.1795	34613	35011	399	132	Hemerythrin domain protein
Methylobacter marinus A45	674036	ARVS01000004	fig|674036.3.peg.2922	584273	584671	399	132	Hemerythrin domain protein
Methylomicrobium buryatense 5G	675511	AOTL01000002	fig|675511.3.peg.316	243893	244288	396	131	Hemerythrin domain protein
Methylomicrobium album BG8	686341	CM001475	fig|686340.8.peg.2245	2305848	2306243	396	131	Hemerythrin domain protein
Methylobacter tundripaludum SV96	697282	NZ_AEGW01000008	fig|697282.3.peg.2699	136516	136914	399	132	Hemerythrin domain protein
Methylomonas koyamae strain R-45383	702114	LUUK01000189	fig|702114.13.peg.3911	5393	5788	396	131	Hemerythrin domain protein
Methylomonas koyamae strain R-49807	702114	LUUL01000077	fig|702114.14.peg.2629	31786	32181	396	131	Hemerythrin domain protein
Methylomonas koyamae strain R-45378	702114	LUUJ01000105	fig|702114.15.peg.3627	50692	51087	396	131	Hemerythrin domain protein
Methylomonas koyamae strain LM6	702114	CP023669	fig|702114.17.peg.1863	1859541	1859936	396	131	Hemerythrin domain protein
Methylomonas koyamae strain Fw12E-Y strain SM2	702114	PPPU01000003	fig|702114.21.peg.2889	119710	120105	396	131	Hemerythrin domain protein
Methylomonas koyamae strain Fw12E-Y	702114	AP019777	fig|702114.23.peg.2952	3066429	3066824	396	131	Hemerythrin domain protein
Methylomonas methanica MC09	857087	NC_015572	fig|857087.3.peg.3214	3489149	3489544	396	131	Hemerythrin domain protein
Methylomonas lenta strain R-45370	980561	LUUI01000152	fig|980561.3.peg.4187	10081	10476	396	131	Hemerythrin domain protein
Methylobacter sp. SO_2017_GW1 bin 29	2.05196e+06	JALNYY010000093	fig|2051955.21.peg.568	10890	11300	411	136	Hemerythrin domain protein
Methylovulum miyakonense HT12	1.07885e+06	AQZU01000006	fig|1078846.3.peg.4123	1279414	1279809	396	131	Hemerythrin domain protein
Methylobacter luteus IMV-B-3098	1.09555e+06	ATYJ01000006	fig|1095552.3.peg.4011	53764	54147	384	127	Hemerythrin domain protein
Methylomonas sp. MK1	1.13155e+06	AQOV01000001	fig|1131552.3.peg.884	957348	957752	405	134	Hemerythrin domain protein
Methylomonas sp. 11b	1.16817e+06	AZXK01000001	fig|1168169.3.peg.16	14562	14966	405	134	Hemerythrin domain protein
Methylobacter tundripaludum 21/22	1.40845e+06	JMLA01000001	fig|1408450.3.peg.148	138245	138640	396	131	Hemerythrin domain protein
Methylobacter tundripaludum 31/32	1.40845e+06	JPOH01000001	fig|1408451.3.peg.1104	1211945	1212340	396	131	Hemerythrin domain protein
Methylobacter sp. BBA5.1	1.49506e+06	JQKS01000028	fig|1495064.3.peg.3727	8578	8976	399	132	Hemerythrin domain protein
Methylomonas denitrificans FJG1	1.53855e+06	JTDD01000086	fig|1538553.4.peg.4034	23750	24154	405	134	Hemerythrin domain protein
Methylobacter tundripaludum Tobar13m-G39	173365	JAIPFK010000013	fig|173365.10.peg.1496	100851	101246	396	131	Hemerythrin domain protein
Methylobacter tundripaludum SO_2017_LW4 bin 69	173365	JALOCG010000042	fig|173365.13.peg.1751	26472	26867	396	131	Hemerythrin domain protein
Methylobacter tundripaludum strain OWC-G53F	173366	PTIY01000023	fig|173365.5.peg.3790	17995	18390	396	131	Hemerythrin domain protein
Methylobacter tundripaludum strain OWC-DMM	173366	PTIZ01000012	fig|173365.6.peg.3928	19178	19573	396	131	Hemerythrin domain protein
Methylomonas sp. EbA	1.85456e+06	JACXSS010000001	fig|1854563.3.peg.2632	2657634	2658038	405	134	Hemerythrin domain protein
Methylomonas sp. LWB	1.90585e+06	MKMC01000023	fig|1905845.3.peg.2682	294832	295248	417	138	Hemerythrin domain protein
Methylobacter sp. UBA2091	1.94686e+06	DCZF01000078	fig|1946861.3.peg.1409	1438	1833	396	131	Hemerythrin domain protein
Methylobacter sp. UBA6696	1.94686e+06	DKJI01000016	fig|1946862.3.peg.1819	47	442	396	131	Hemerythrin domain protein
Methylobacter sp. UBA6712	1.94686e+06	DKIS01000025	fig|1946864.3.peg.1513	11377	11772	396	131	Hemerythrin domain protein
Methylobacter sp. SO_2017_GW1 bin 29	2.05196e+06	JALNYY010000029	fig|2051955.21.peg.3232	28357	28752	396	131	Hemerythrin domain protein
Methylobacter sp. B4-02	2.05196e+06	JAMJFP010000081	fig|2051955.22.peg.4382	8562	8960	399	132	Hemerythrin domain protein
Methylobacter sp. strain DP16D_bin.19	2.05196e+06	SCPZ01000133	fig|2051955.9.peg.356	33039	33434	396	131	Hemerythrin domain protein
Methylobacter sp. KRF1	2.49775e+06	RYFG01000007	fig|2497749.3.peg.377	116547	116936	390	129	Hemerythrin domain protein
Methylomonas sp. GJ1	2.60898e+06	CP043929	fig|2608981.3.peg.2248	2368359	2368766	408	135	Hemerythrin domain protein
Methylomonas sp. LL1	2.78579e+06	CP064653	fig|2785785.3.peg.117	124683	125096	414	137	Hemerythrin domain protein
Methylomonas LK_3	416.39	416.39.con.0028	fig|416.39.peg.2685	36645	37040	396	131	Hemerythrin domain protein
Methylomonas sp. SO_2017_LW3 bin 4	418.2	JALOBS010000045	fig|418.20.peg.3091	6018	6413	396	131	Hemerythrin domain protein
Methylomonas methanica strain R-45363	421.17	LUUG01000123	fig|421.17.peg.4850	15889	16293	405	134	Hemerythrin domain protein
Methylomonas methanica strain NCIMB 11130	421.18	LUUF01000102	fig|421.18.peg.4631	10121	10525	405	134	Hemerythrin domain protein
Methylomonas methanica strain R-45371	421.19	LUUH01000070	fig|421.19.peg.3565	29598	30002	405	134	Hemerythrin domain protein
Methylomonas methanica strain S-1	421.26	SMCN01000038	fig|421.26.peg.4651	23800	24204	405	134	Hemerythrin domain protein
Methylobacter tundripaludum SV96	697282	NZ_AEGW01000005	fig|697282.3.peg.2000	195070	195465	396	131	Hemerythrin domain protein
Methylomonas koyamae strain R-45383	702114	LUUK01000183	fig|702114.13.peg.3744	51434	51850	417	138	Hemerythrin domain protein
Methylomonas methanica MC09	857087	NC_015572	fig|857087.3.peg.954	1023486	1023881	396	131	Hemerythrin domain protein
Methylomonas lenta strain R-45370	980561	LUUI01000022	fig|980561.3.peg.335	50430	50831	402	133	Hemerythrin domain protein
Methylomonas sp. EbA	1.85456e+06	JACXSS010000001	fig|1854563.3.peg.3041	3044230	3044619	390	129	Hemerythrin
Methylomonas methanica strain S-1	421.26	SMCN01000014	fig|421.26.peg.3102	28079	28483	405	134	Hemerythrin
Methylobacter tundripaludum Tobar13m-G39	173365	JAIPFK010000003	fig|173365.10.peg.3964	139824	140273	450	149	Hemerythrin domain protein
Methylobacter tundripaludum SO_2017_LW4 bin 69	173365	JALOCG010000009	fig|173365.13.peg.3160	20036	20485	450	149	Hemerythrin domain protein
Methylobacter tundripaludum strain OWC-G53F	173366	PTIY01000007	fig|173365.5.peg.2115	57583	58032	450	149	Hemerythrin domain protein
Methylobacter sp. strain FW305_bin.9	2.05196e+06	SCTW01000049	fig|2051955.10.peg.393	449	898	450	149	Hemerythrin domain protein
Methylobacter sp. LH_M5	2.05196e+06	JAGXGY010000042	fig|2051955.23.peg.2512	26050	26490	441	146	Hemerythrin domain protein
Methylomonas sp. SO_2017_LW3 bin 4	418.2	JALOBS010000004	fig|418.20.peg.5037	77029	77481	453	150	Hemerythrin domain protein
Methylomonas methanica MC09	857087	NC_015572	fig|857087.3.peg.2870	3127637	3128074	438	145	Hemerythrin domain protein
Methylomonas sp. ZR1	1.79707e+06	RCST01000001	fig|1797072.3.peg.1043	1113528	1113932	405	134	Hemerythrin
Methylomonas sp. EbB	1.85456e+06	JACXST010000003	fig|1854564.3.peg.4000	244730	245134	405	134	Hemerythrin
Methylomonas sp. EFPC1	2.81265e+06	CP070494	fig|2812647.3.peg.2046	2103358	2103762	405	134	Hemerythrin
Methylomonas koyamae strain Fw12E-Y strain SM2	702114	PPPU01000050	fig|702114.21.peg.3219	13280	13756	477	158	putative hemerythrin-like protein
Methylomonas koyamae strain Fw12E-Y	702114	AP019777	fig|702114.23.peg.2740	2838261	2838653	393	130	putative hemerythrin-like protein
Methylocaldum sp. 175 strain 175	1.5281e+06	FXAM01000001	fig|1528100.4.peg.5184	4574761	4575168	408	135	Hemerythrin domain protein
Methylomagnum ishizawai strain RS11D-Pr	1.76099e+06	AP019783	fig|1760988.4.peg.4382	4521577	4521984	408	135	Hemerythrin domain protein
Methylomonas sp. LL1	2.78579e+06	CP064653	fig|2785785.3.peg.2765	2896916	2897320	405	134	Hemerythrin domain protein
Methylomonas LK_5	416.38	416.38.con.0002	fig|416.38.peg.307	23399	23833	435	144	Hemerythrin domain protein
Methylomonas LK_3	416.39	416.39.con.0029	fig|416.39.peg.2713	19617	20027	411	136	Hemerythrin domain protein
Methylomonas LK_4	416.4	416.40.con.0001	fig|416.40.peg.481	496221	496679	459	152	Hemerythrin domain protein
Methylomonas sp. SO_2017_LW3 bin 4	418.2	JALOBS010000007	fig|418.20.peg.463	65623	66027	405	134	Hemerythrin domain protein
Methylomonas sp. strain FW.007	418.6	PERU01000014	fig|418.6.peg.2150	68453	68887	435	144	Hemerythrin domain protein
Methylomonas methanica MC09	857087	NC_015572	fig|857087.3.peg.3609	3933850	3934254	405	134	Hemerythrin domain protein
Methylomonas sp. ZR1	1.79707e+06	RCST01000001	fig|1797072.3.peg.849	895811	896194	384	127	Hemerythrin
Methylomonas sp. EbB	1.85456e+06	JACXST010000003	fig|1854564.3.peg.4349	599907	600290	384	127	Hemerythrin
Methylomonas sp. EFPC1	2.81265e+06	CP070494	fig|2812647.3.peg.1860	1893779	1894162	384	127	Hemerythrin
Methylomonas methanica strain S-1	421.26	SMCN01000014	fig|421.26.peg.3103	28507	28920	414	137	Hemerythrin
Methyloterricola oryzae strain 73a	1.49505e+06	JYNS01000006	fig|1495050.5.peg.2064	43638	44045	408	135	hemerythrin family protein
Methylomonas sp. EbA	1.85456e+06	JACXSS010000001	fig|1854563.3.peg.3040	3044030	3044206	177	58	Hemerythrin
Methylomonas sp. EbB	1.85456e+06	JACXST010000002	fig|1854564.3.peg.2268	244522	244776	255	84	Hemerythrin
Methylobacter sp. SO_2017_GW1 bin 29	2.05196e+06	JALNYY010000008	fig|2051955.21.peg.1909	37161	37667	507	168	hemerythrin domain-containing protein
Methylomonas sp. LL1	2.78579e+06	CP064653	fig|2785785.3.peg.389	404987	405388	402	133	Hemerythrin
Methylomonas sp. LL1	2.78579e+06	CP064653	fig|2785785.3.peg.441	457136	457540	405	134	Hemerythrin
Methylomonas LK_3	416.39	416.39.con.0005	fig|416.39.peg.817	42716	43108	393	130	Hemerythrin
Methylomonas LK_4	416.4	416.40.con.0001	fig|416.40.peg.140	146011	146409	399	132	Hemerythrin
Methylomonas sp. LW13	107637	JNLB01000001	fig|107637.3.peg.465	515268	515552	285	94	Uncharacterized homolog of the cytoplasmic domain of flagellar protein FhlB
Methylomonas sp. LW13	107637	JNLB01000004	fig|107637.3.peg.1542	128205	128612	408	135	Similar to flagellar basal body-associated protein FliL
Methylomonas sp. LW13	107637	JNLB01000004	fig|107637.3.peg.1638	214388	214756	369	122	Chemotaxis regulator - transmits chemoreceptor signals to flagellar motor components CheY
Methylomonas sp. LW13	107637	JNLB01000005	fig|107637.3.peg.1795	82685	83143	459	152	Flagellar assembly factor FliW
Methylomonas sp. LW13	107637	JNLB01000006	fig|107637.3.peg.2011	15561	16742	1182	393	Flagellar protein FlgT
Methylomonas sp. LW13	107637	JNLB01000006	fig|107637.3.peg.2193	214439	214729	291	96	Flagellar biosynthesis protein FliS
Methylomonas sp. LW13	107637	JNLB01000006	fig|107637.3.peg.2194	214841	216238	1398	465	Flagellar cap protein FliD
Methylomonas sp. LW13	107637	JNLB01000006	fig|107637.3.peg.2195	216265	216702	438	145	Flagellar protein FlaG
Methylomonas sp. LW13	107637	JNLB01000007	fig|107637.3.peg.2343	103465	104829	1365	454	Flagellar hook-length control protein FliK
Methylomonas sp. LW13	107637	JNLB01000007	fig|107637.3.peg.2444	209534	209896	363	120	Chemotaxis regulator - transmits chemoreceptor signals to flagellar motor components CheY
Methylomonas sp. LW13	107637	JNLB01000007	fig|107637.3.peg.2475	240377	241183	807	268	Chemotaxis regulator - transmits chemoreceptor signals to flagellar motor components CheY
Methylomonas sp. LW13	107637	JNLB01000007	fig|107637.3.peg.2335	95235	96440	1206	401	Flagellar sensor histidine kinase FleS
Methylomonas sp. LW13	107637	JNLB01000007	fig|107637.3.peg.2336	96427	97809	1383	460	Flagellar two-component response regulator FleR
Methylomonas sp. LW13	107637	JNLB01000007	fig|107637.3.peg.2337	97865	98176	312	103	Flagellar hook-basal body complex protein FliE
Methylomonas sp. LW13	107637	JNLB01000007	fig|107637.3.peg.2338	98194	99945	1752	583	Flagellar M-ring protein FliF
Methylomonas sp. LW13	107637	JNLB01000007	fig|107637.3.peg.2339	99938	100948	1011	336	Flagellar motor switch protein FliG
Methylomonas sp. LW13	107637	JNLB01000012	fig|107637.3.peg.3320	65007	65978	972	323	Flagellar motor rotation protein MotB
Methylomonas sp. LW13	107637	JNLB01000012	fig|107637.3.peg.3321	65990	66835	846	281	Flagellar motor rotation protein MotA
Methylomonas sp. LW13	107637	JNLB01000014	fig|107637.3.peg.3638	33538	34332	795	264	Chemotaxis regulator - transmits chemoreceptor signals to flagellar motor components CheY
Methylomonas sp. LW13	107637	JNLB01000014	fig|107637.3.peg.3606	5394	5762	369	122	Chemotaxis regulator - transmits chemoreceptor signals to flagellar motor components CheY
Methylomonas sp. LW13	107637	JNLB01000023	fig|107637.3.peg.4438	13353	14261	909	302	Flagellar hook-associated protein FlgL
Methylomonas sp. LW13	107637	JNLB01000023	fig|107637.3.peg.4439	14271	15938	1668	555	Flagellar hook-associated protein FlgK
Methylomonas sp. LW13	107637	JNLB01000023	fig|107637.3.peg.4440	15948	16994	1047	348	Flagellar protein FlgJ [peptidoglycan hydrolase]
Methylomonas sp. LW13	107637	JNLB01000023	fig|107637.3.peg.4441	17040	18128	1089	362	Flagellar P-ring protein FlgI
Methylomonas sp. LW13	107637	JNLB01000023	fig|107637.3.peg.4442	18151	18855	705	234	Flagellar L-ring protein FlgH
Methylomonas sp. LW13	107637	JNLB01000023	fig|107637.3.peg.4443	18871	19659	789	262	Flagellar basal-body rod protein FlgG
Methylomonas sp. LW13	107637	JNLB01000023	fig|107637.3.peg.4444	19711	20454	744	247	Flagellar basal-body rod protein FlgF
Methylomonas sp. LW13	107637	JNLB01000023	fig|107637.3.peg.4445	20471	21802	1332	443	Flagellar hook protein FlgE
Methylomonas sp. LW13	107637	JNLB01000023	fig|107637.3.peg.4446	21816	22496	681	226	Flagellar basal-body rod modification protein FlgD
Methylomonas sp. LW13	107637	JNLB01000023	fig|107637.3.peg.4447	22504	22920	417	138	Flagellar basal-body rod protein FlgC
Methylomonas sp. LW13	107637	JNLB01000023	fig|107637.3.peg.4448	22923	23318	396	131	Flagellar basal-body rod protein FlgB
Methylomonas sp. LW13	107637	JNLB01000023	fig|107637.3.peg.4451	25452	26141	690	229	Flagellar basal-body P-ring formation protein FlgA
Methylomonas sp. LW13	107637	JNLB01000023	fig|107637.3.peg.4454	27049	27828	780	259	Flagellar brake protein YcgR
Methylomonas sp. LW13	107637	JNLB01000025	fig|107637.3.peg.4591	38533	39390	858	285	Flagellar motor rotation protein MotB
Methylomonas sp. LW13	107637	JNLB01000025	fig|107637.3.peg.4592	39425	40171	747	248	Flagellar motor rotation protein MotA
Methylomonas sp. LW13	107637	JNLB01000025	fig|107637.3.peg.4596	44236	44622	387	128	Chemotaxis regulator - transmits chemoreceptor signals to flagellar motor components CheY
Methylomonas sp. LW13	107637	JNLB01000025	fig|107637.3.peg.4597	44710	45441	732	243	RNA polymerase sigma factor for flagellar operon	GO:0003677|DNA binding;GO:0003700|transcription factor activity;GO:0006352|transcription initiation;GO:0016987|sigma factor activity
Methylomonas sp. LW13	107637	JNLB01000025	fig|107637.3.peg.4598	45453	46277	825	274	Flagellar synthesis regulator FleN
Methylomonas sp. LW13	107637	JNLB01000025	fig|107637.3.peg.4599	46318	47733	1416	471	Flagellar biosynthesis protein FlhF
Methylomonas sp. LW13	107637	JNLB01000025	fig|107637.3.peg.4600	47749	49854	2106	701	Flagellar biosynthesis protein FlhA
Methylomonas sp. LW13	107637	JNLB01000025	fig|107637.3.peg.4601	49874	51001	1128	375	Flagellar biosynthesis protein FlhB
Methylomonas sp. LW13	107637	JNLB01000025	fig|107637.3.peg.4602	51002	51778	777	258	Flagellar biosynthesis protein FliR
Methylomonas sp. LW13	107637	JNLB01000025	fig|107637.3.peg.4603	51775	52047	273	90	Flagellar biosynthesis protein FliQ
Methylomonas sp. LW13	107637	JNLB01000025	fig|107637.3.peg.4604	52057	52803	747	248	Flagellar biosynthesis protein FliP
Methylomonas sp. LW13	107637	JNLB01000025	fig|107637.3.peg.4605	52796	53137	342	113	Flagellar biosynthesis protein FliO
Methylomonas sp. LW13	107637	JNLB01000025	fig|107637.3.peg.4606	53239	53691	453	150	Flagellar motor switch protein FliN
Methylomonas sp. LW13	107637	JNLB01000025	fig|107637.3.peg.4607	53710	54690	981	326	Flagellar motor switch protein FliM
Methylomonas sp. LW13	107637	JNLB01000025	fig|107637.3.peg.4608	54691	55164	474	157	Flagellar basal body-associated protein FliL
Methylomonas sp. LW13	107637	JNLB01000030	fig|107637.3.peg.4755	6137	7552	1416	471	Flagellar regulatory protein FleQ
Methylovulum miyakonense HT12	1.07885e+06	AQZU01000004	fig|1078846.3.peg.2479	118374	118967	594	197	Flagellar transcriptional activator FlhC
Methylobacter luteus IMV-B-3098	1.09555e+06	ATYJ01000001	fig|1095552.3.peg.1841	1944631	1944798	168	55	Uncharacterized homolog of the cytoplasmic domain of flagellar protein FhlB
Methylobacter luteus IMV-B-3098	1.09555e+06	ATYJ01000005	fig|1095552.3.peg.3803	43086	44426	1341	446	Flagellar motor rotation protein MotB
Methylococcaceae bacterium KoM1	1.11647e+06	AYLO01000025	fig|1116472.3.peg.762	10050	11798	1749	582	Flagellar M-ring protein FliF
Methylococcaceae bacterium KoM1	1.11647e+06	AYLO01000025	fig|1116472.3.peg.763	11835	12149	315	104	Flagellar hook-basal body complex protein FliE
Methylococcaceae bacterium KoM1	1.11647e+06	AYLO01000025	fig|1116472.3.peg.765	13027	14454	1428	475	Flagellar regulatory protein FleQ
Methylococcaceae bacterium KoM1	1.11647e+06	AYLO01000025	fig|1116472.3.peg.767	15191	16219	1029	342	Flagellar hook-length control protein FliK
Methylococcaceae bacterium KoM1	1.11647e+06	AYLO01000025	fig|1116472.3.peg.768	16694	17665	972	323	Flagellar motor switch protein FliM
Methylococcaceae bacterium KoM1	1.11647e+06	AYLO01000025	fig|1116472.3.peg.769	17709	18074	366	121	Flagellar motor switch protein FliN
Methylococcaceae bacterium KoM1	1.11647e+06	AYLO01000025	fig|1116472.3.peg.770	18074	18541	468	155	Flagellar biosynthesis protein FliO
Methylococcaceae bacterium KoM1	1.11647e+06	AYLO01000025	fig|1116472.3.peg.771	18534	19292	759	252	Flagellar biosynthesis protein FliP
Methylococcaceae bacterium KoM1	1.11647e+06	AYLO01000025	fig|1116472.3.peg.772	19308	19577	270	89	Flagellar biosynthesis protein FliQ
Methylococcaceae bacterium KoM1	1.11647e+06	AYLO01000025	fig|1116472.3.peg.774	19653	20354	702	233	Flagellar biosynthesis protein FliR
Methylococcaceae bacterium KoM1	1.11647e+06	AYLO01000025	fig|1116472.3.peg.775	20392	21522	1131	376	Flagellar biosynthesis protein FlhB
Methylococcaceae bacterium KoM1	1.11647e+06	AYLO01000025	fig|1116472.3.peg.776	21532	23625	2094	697	Flagellar biosynthesis protein FlhA
Methylococcaceae bacterium KoM1	1.11647e+06	AYLO01000025	fig|1116472.3.peg.777	23642	25264	1623	540	Flagellar biosynthesis protein FlhF
Methylococcaceae bacterium KoM1	1.11647e+06	AYLO01000025	fig|1116472.3.peg.753	2427	3629	1203	400	Flagellar motor rotation protein MotB
Methylococcaceae bacterium KoM1	1.11647e+06	AYLO01000025	fig|1116472.3.peg.778	25296	26129	834	277	Flagellar synthesis regulator FleN
Methylococcaceae bacterium KoM1	1.11647e+06	AYLO01000025	fig|1116472.3.peg.779	26126	26860	735	244	RNA polymerase sigma factor for flagellar operon
Methylococcaceae bacterium KoM1	1.11647e+06	AYLO01000025	fig|1116472.3.peg.780	26911	27666	756	251	Flagellar motor rotation protein MotA
Methylococcaceae bacterium KoM1	1.11647e+06	AYLO01000025	fig|1116472.3.peg.781	27703	28911	1209	402	Flagellar motor rotation protein MotB
Methylococcaceae bacterium KoM1	1.11647e+06	AYLO01000025	fig|1116472.3.peg.754	3641	4549	909	302	Flagellar motor rotation protein MotA
Methylococcaceae bacterium KoM1	1.11647e+06	AYLO01000025	fig|1116472.3.peg.794	40747	41109	363	120	Chemotaxis regulator - transmits chemoreceptor signals to flagellar motor components CheY
Methylococcaceae bacterium KoM1	1.11647e+06	AYLO01000025	fig|1116472.3.peg.797	42403	42792	390	129	Flagellar basal-body rod protein FlgB
Methylococcaceae bacterium KoM1	1.11647e+06	AYLO01000025	fig|1116472.3.peg.798	42795	43211	417	138	Flagellar basal-body rod protein FlgC
Methylococcaceae bacterium KoM1	1.11647e+06	AYLO01000025	fig|1116472.3.peg.799	43214	43882	669	222	Flagellar basal-body rod modification protein FlgD
Methylococcaceae bacterium KoM1	1.11647e+06	AYLO01000025	fig|1116472.3.peg.800	43898	45172	1275	424	Flagellar hook protein FlgE
Methylococcaceae bacterium KoM1	1.11647e+06	AYLO01000025	fig|1116472.3.peg.801	45195	45935	741	246	Flagellar basal-body rod protein FlgF
Methylococcaceae bacterium KoM1	1.11647e+06	AYLO01000025	fig|1116472.3.peg.802	45989	46777	789	262	Flagellar basal-body rod protein FlgG
Methylococcaceae bacterium KoM1	1.11647e+06	AYLO01000025	fig|1116472.3.peg.803	46828	47460	633	210	Flagellar L-ring protein FlgH
Methylococcaceae bacterium KoM1	1.11647e+06	AYLO01000025	fig|1116472.3.peg.804	47487	48590	1104	367	Flagellar P-ring protein FlgI
Methylococcaceae bacterium KoM1	1.11647e+06	AYLO01000025	fig|1116472.3.peg.805	48603	49619	1017	338	Flagellar protein FlgJ [peptidoglycan hydrolase]
Methylococcaceae bacterium KoM1	1.11647e+06	AYLO01000025	fig|1116472.3.peg.806	49722	51326	1605	534	Flagellar hook-associated protein FlgK
Methylococcaceae bacterium KoM1	1.11647e+06	AYLO01000025	fig|1116472.3.peg.756	5099	5596	498	165	Flagellar biosynthesis protein FlgN
Methylococcaceae bacterium KoM1	1.11647e+06	AYLO01000025	fig|1116472.3.peg.807	51333	52262	930	309	Flagellar hook-associated protein FlgL
Methylococcaceae bacterium KoM1	1.11647e+06	AYLO01000025	fig|1116472.3.peg.810	53884	54225	342	113	Flagellar biosynthesis protein FliT
Methylococcaceae bacterium KoM1	1.11647e+06	AYLO01000025	fig|1116472.3.peg.811	54212	54652	441	146	Flagellar biosynthesis protein FliS
Methylococcaceae bacterium KoM1	1.11647e+06	AYLO01000025	fig|1116472.3.peg.812	54668	56089	1422	473	Flagellar cap protein FliD
Methylococcaceae bacterium KoM1	1.11647e+06	AYLO01000025	fig|1116472.3.peg.749	617	1003	387	128	Chemotaxis regulator - transmits chemoreceptor signals to flagellar motor components CheY
Methylococcaceae bacterium KoM1	1.11647e+06	AYLO01000025	fig|1116472.3.peg.758	6543	7004	462	153	Flagellar protein FliJ
Methylococcaceae bacterium KoM1	1.11647e+06	AYLO01000025	fig|1116472.3.peg.760	8359	9060	702	233	Flagellar assembly protein FliH
Methylococcaceae bacterium KoM1	1.11647e+06	AYLO01000025	fig|1116472.3.peg.761	9047	10045	999	332	Flagellar motor switch protein FliG
Methylococcaceae bacterium KoM1	1.11647e+06	AYLO01000116	fig|1116472.3.peg.3244	17823	18098	276	91	Uncharacterized homolog of the cytoplasmic domain of flagellar protein FhlB
Methylococcaceae bacterium KoM1	1.11647e+06	AYLO01000164	fig|1116472.3.peg.3968	619	2124	1506	501	hypothetical protein formerly called flagellar hook-length control protein FliK
Methylomonas sp. MK1	1.13155e+06	AQOV01000001	fig|1131552.3.peg.1076	1164216	1165838	1623	540	Flagellar synthesis regulator FleN / Domain of unknown function
Methylomonas sp. MK1	1.13155e+06	AQOV01000001	fig|1131552.3.peg.1082	1170190	1170651	462	153	Similar to flagellar basal body-associated protein FliL
Methylomonas sp. MK1	1.13155e+06	AQOV01000001	fig|1131552.3.peg.1190	1278318	1279733	1416	471	Flagellar regulatory protein FleQ
Methylomonas sp. MK1	1.13155e+06	AQOV01000001	fig|1131552.3.peg.1268	1375400	1376206	807	268	Chemotaxis regulator - transmits chemoreceptor signals to flagellar motor components CheY
Methylomonas sp. MK1	1.13155e+06	AQOV01000001	fig|1131552.3.peg.1298	1405595	1405957	363	120	Chemotaxis regulator - transmits chemoreceptor signals to flagellar motor components CheY
Methylomonas sp. MK1	1.13155e+06	AQOV01000001	fig|1131552.3.peg.1405	1515746	1517110	1365	454	Flagellar hook-length control protein FliK
Methylomonas sp. MK1	1.13155e+06	AQOV01000001	fig|1131552.3.peg.1409	1519627	1520637	1011	336	Flagellar motor switch protein FliG
Methylomonas sp. MK1	1.13155e+06	AQOV01000001	fig|1131552.3.peg.1410	1520630	1522381	1752	583	Flagellar M-ring protein FliF
Methylomonas sp. MK1	1.13155e+06	AQOV01000001	fig|1131552.3.peg.1411	1522400	1522711	312	103	Flagellar hook-basal body complex protein FliE
Methylomonas sp. MK1	1.13155e+06	AQOV01000001	fig|1131552.3.peg.1412	1522767	1524149	1383	460	Flagellar two-component response regulator FleR
Methylomonas sp. MK1	1.13155e+06	AQOV01000001	fig|1131552.3.peg.1413	1524136	1525341	1206	401	Flagellar sensor histidine kinase FleS
Methylomonas sp. MK1	1.13155e+06	AQOV01000001	fig|1131552.3.peg.1759	1857667	1859331	1665	554	Flagellar hook-associated protein FlgK
Methylomonas sp. MK1	1.13155e+06	AQOV01000001	fig|1131552.3.peg.1993	2107952	2109109	1158	385	Flagellar protein FlgT
Methylomonas sp. MK1	1.13155e+06	AQOV01000001	fig|1131552.3.peg.2193	2328834	2329613	780	259	Flagellar brake protein YcgR
Methylomonas sp. MK1	1.13155e+06	AQOV01000001	fig|1131552.3.peg.2196	2330521	2331210	690	229	Flagellar basal-body P-ring formation protein FlgA
Methylomonas sp. MK1	1.13155e+06	AQOV01000001	fig|1131552.3.peg.2199	2333344	2333739	396	131	Flagellar basal-body rod protein FlgB
Methylomonas sp. MK1	1.13155e+06	AQOV01000001	fig|1131552.3.peg.2200	2333742	2334158	417	138	Flagellar basal-body rod protein FlgC
Methylomonas sp. MK1	1.13155e+06	AQOV01000001	fig|1131552.3.peg.2201	2334166	2334846	681	226	Flagellar basal-body rod modification protein FlgD
Methylomonas sp. MK1	1.13155e+06	AQOV01000001	fig|1131552.3.peg.2202	2334860	2336191	1332	443	Flagellar hook protein FlgE
Methylomonas sp. MK1	1.13155e+06	AQOV01000001	fig|1131552.3.peg.2203	2336208	2336951	744	247	Flagellar basal-body rod protein FlgF
Methylomonas sp. MK1	1.13155e+06	AQOV01000001	fig|1131552.3.peg.2204	2337003	2337791	789	262	Flagellar basal-body rod protein FlgG
Methylomonas sp. MK1	1.13155e+06	AQOV01000001	fig|1131552.3.peg.2205	2337807	2338511	705	234	Flagellar L-ring protein FlgH
Methylomonas sp. MK1	1.13155e+06	AQOV01000001	fig|1131552.3.peg.2206	2338534	2339619	1086	361	Flagellar P-ring protein FlgI
Methylomonas sp. MK1	1.13155e+06	AQOV01000001	fig|1131552.3.peg.2207	2339664	2340710	1047	348	Flagellar protein FlgJ [peptidoglycan hydrolase]
Methylomonas sp. MK1	1.13155e+06	AQOV01000001	fig|1131552.3.peg.2208	2340720	2342387	1668	555	Flagellar hook-associated protein FlgK
Methylomonas sp. MK1	1.13155e+06	AQOV01000001	fig|1131552.3.peg.2637	2760765	2761646	882	293	Flagellar motor rotation protein MotB
Methylomonas sp. MK1	1.13155e+06	AQOV01000001	fig|1131552.3.peg.2638	2761657	2762403	747	248	Flagellar motor rotation protein MotA
Methylomonas sp. MK1	1.13155e+06	AQOV01000001	fig|1131552.3.peg.2642	2766477	2766863	387	128	Chemotaxis regulator - transmits chemoreceptor signals to flagellar motor components CheY
Methylomonas sp. MK1	1.13155e+06	AQOV01000001	fig|1131552.3.peg.2643	2766951	2767697	747	248	RNA polymerase sigma factor for flagellar operon	GO:0003677|DNA binding;GO:0003700|transcription factor activity;GO:0006352|transcription initiation;GO:0016987|sigma factor activity
Methylomonas sp. MK1	1.13155e+06	AQOV01000001	fig|1131552.3.peg.2644	2767694	2768518	825	274	Flagellar synthesis regulator FleN
Methylomonas sp. MK1	1.13155e+06	AQOV01000001	fig|1131552.3.peg.2645	2768559	2769965	1407	468	Flagellar biosynthesis protein FlhF
Methylomonas sp. MK1	1.13155e+06	AQOV01000001	fig|1131552.3.peg.2646	2769981	2772086	2106	701	Flagellar biosynthesis protein FlhA
Methylomonas sp. MK1	1.13155e+06	AQOV01000001	fig|1131552.3.peg.2647	2772106	2773233	1128	375	Flagellar biosynthesis protein FlhB
Methylomonas sp. MK1	1.13155e+06	AQOV01000001	fig|1131552.3.peg.2648	2773234	2774010	777	258	Flagellar biosynthesis protein FliR
Methylomonas sp. MK1	1.13155e+06	AQOV01000001	fig|1131552.3.peg.2649	2774007	2774168	162	53	Flagellar biosynthesis protein FliQ
Methylomonas sp. MK1	1.13155e+06	AQOV01000001	fig|1131552.3.peg.2651	2774289	2775035	747	248	Flagellar biosynthesis protein FliP
Methylomonas sp. MK1	1.13155e+06	AQOV01000001	fig|1131552.3.peg.2652	2775028	2775471	444	147	Flagellar biosynthesis protein FliO
Methylomonas sp. MK1	1.13155e+06	AQOV01000001	fig|1131552.3.peg.2653	2775471	2775923	453	150	Flagellar motor switch protein FliN
Methylomonas sp. MK1	1.13155e+06	AQOV01000001	fig|1131552.3.peg.2654	2775942	2776922	981	326	Flagellar motor switch protein FliM
Methylomonas sp. MK1	1.13155e+06	AQOV01000001	fig|1131552.3.peg.2655	2776923	2777396	474	157	Flagellar basal body-associated protein FliL
Methylomonas sp. MK1	1.13155e+06	AQOV01000001	fig|1131552.3.peg.2824	2969496	2969954	459	152	Flagellar assembly factor FliW
Methylomonas sp. MK1	1.13155e+06	AQOV01000001	fig|1131552.3.peg.3296	3461706	3462551	846	281	Flagellar motor rotation protein MotA
Methylomonas sp. MK1	1.13155e+06	AQOV01000001	fig|1131552.3.peg.3297	3462563	3463534	972	323	Flagellar motor rotation protein MotB
Methylomonas sp. MK1	1.13155e+06	AQOV01000001	fig|1131552.3.peg.437	507986	508354	369	122	Chemotaxis regulator - transmits chemoreceptor signals to flagellar motor components CheY
Methylomonas sp. MK1	1.13155e+06	AQOV01000002	fig|1131552.3.peg.4299	1017564	1017848	285	94	Uncharacterized homolog of the cytoplasmic domain of flagellar protein FhlB
Methylomonas sp. MK1	1.13155e+06	AQOV01000002	fig|1131552.3.peg.3398	35744	36538	795	264	Chemotaxis regulator - transmits chemoreceptor signals to flagellar motor components CheY
Methylomonas sp. MK1	1.13155e+06	AQOV01000002	fig|1131552.3.peg.3847	516871	517308	438	145	Flagellar protein FlaG
Methylomonas sp. MK1	1.13155e+06	AQOV01000002	fig|1131552.3.peg.3848	517335	518732	1398	465	Flagellar cap protein FliD
Methylomonas sp. MK1	1.13155e+06	AQOV01000002	fig|1131552.3.peg.3849	518748	519134	387	128	Flagellar biosynthesis protein FliS
Methylomonas sp. MK1	1.13155e+06	AQOV01000002	fig|1131552.3.peg.3361	5622	5990	369	122	Chemotaxis regulator - transmits chemoreceptor signals to flagellar motor components CheY
Methylomonas sp. 11b	1.16817e+06	AZXK01000001	fig|1168169.3.peg.992	1066646	1067014	369	122	Chemotaxis regulator - transmits chemoreceptor signals to flagellar motor components CheY
Methylomonas sp. 11b	1.16817e+06	AZXK01000002	fig|1168169.3.peg.1157	109692	110498	807	268	Chemotaxis regulator - transmits chemoreceptor signals to flagellar motor components CheY
Methylomonas sp. 11b	1.16817e+06	AZXK01000002	fig|1168169.3.peg.2190	1145264	1145554	291	96	Flagellar biosynthesis protein FliS
Methylomonas sp. 11b	1.16817e+06	AZXK01000002	fig|1168169.3.peg.2191	1145666	1147063	1398	465	Flagellar cap protein FliD
Methylomonas sp. 11b	1.16817e+06	AZXK01000002	fig|1168169.3.peg.2192	1147090	1147527	438	145	Flagellar protein FlaG
Methylomonas sp. 11b	1.16817e+06	AZXK01000002	fig|1168169.3.peg.1188	140910	141272	363	120	Chemotaxis regulator - transmits chemoreceptor signals to flagellar motor components CheY
Methylomonas sp. 11b	1.16817e+06	AZXK01000002	fig|1168169.3.peg.1080	15470	16885	1416	471	Flagellar regulatory protein FleQ
Methylomonas sp. 11b	1.16817e+06	AZXK01000002	fig|1168169.3.peg.2660	1645305	1646099	795	264	Chemotaxis regulator - transmits chemoreceptor signals to flagellar motor components CheY
Methylomonas sp. 11b	1.16817e+06	AZXK01000002	fig|1168169.3.peg.2697	1675967	1676335	369	122	Chemotaxis regulator - transmits chemoreceptor signals to flagellar motor components CheY
Methylomonas sp. 11b	1.16817e+06	AZXK01000002	fig|1168169.3.peg.2769	1761465	1762436	972	323	Flagellar motor rotation protein MotB
Methylomonas sp. 11b	1.16817e+06	AZXK01000002	fig|1168169.3.peg.2770	1762448	1763293	846	281	Flagellar motor rotation protein MotA
Methylomonas sp. 11b	1.16817e+06	AZXK01000002	fig|1168169.3.peg.3244	2259430	2259888	459	152	Flagellar assembly factor FliW
Methylomonas sp. 11b	1.16817e+06	AZXK01000002	fig|1168169.3.peg.3384	2409482	2409955	474	157	Flagellar basal body-associated protein FliL
Methylomonas sp. 11b	1.16817e+06	AZXK01000002	fig|1168169.3.peg.3385	2409956	2410936	981	326	Flagellar motor switch protein FliM
Methylomonas sp. 11b	1.16817e+06	AZXK01000002	fig|1168169.3.peg.3386	2410955	2411407	453	150	Flagellar motor switch protein FliN
Methylomonas sp. 11b	1.16817e+06	AZXK01000002	fig|1168169.3.peg.3387	2411407	2411850	444	147	Flagellar biosynthesis protein FliO
Methylomonas sp. 11b	1.16817e+06	AZXK01000002	fig|1168169.3.peg.3388	2411843	2412589	747	248	Flagellar biosynthesis protein FliP
Methylomonas sp. 11b	1.16817e+06	AZXK01000002	fig|1168169.3.peg.3390	2412710	2412871	162	53	Flagellar biosynthesis protein FliQ
Methylomonas sp. 11b	1.16817e+06	AZXK01000002	fig|1168169.3.peg.3391	2412868	2413644	777	258	Flagellar biosynthesis protein FliR
Methylomonas sp. 11b	1.16817e+06	AZXK01000002	fig|1168169.3.peg.3392	2413645	2414772	1128	375	Flagellar biosynthesis protein FlhB
Methylomonas sp. 11b	1.16817e+06	AZXK01000002	fig|1168169.3.peg.3393	2414792	2416897	2106	701	Flagellar biosynthesis protein FlhA
Methylomonas sp. 11b	1.16817e+06	AZXK01000002	fig|1168169.3.peg.3394	2416913	2418319	1407	468	Flagellar biosynthesis protein FlhF
Methylomonas sp. 11b	1.16817e+06	AZXK01000002	fig|1168169.3.peg.3395	2418351	2419184	834	277	Flagellar synthesis regulator FleN
Methylomonas sp. 11b	1.16817e+06	AZXK01000002	fig|1168169.3.peg.3396	2419181	2419927	747	248	RNA polymerase sigma factor for flagellar operon	GO:0003677|DNA binding;GO:0003700|transcription factor activity;GO:0006352|transcription initiation;GO:0016987|sigma factor activity
Methylomonas sp. 11b	1.16817e+06	AZXK01000002	fig|1168169.3.peg.3397	2420015	2420401	387	128	Chemotaxis regulator - transmits chemoreceptor signals to flagellar motor components CheY
Methylomonas sp. 11b	1.16817e+06	AZXK01000002	fig|1168169.3.peg.3401	2424460	2425206	747	248	Flagellar motor rotation protein MotA
Methylomonas sp. 11b	1.16817e+06	AZXK01000002	fig|1168169.3.peg.3402	2425217	2426098	882	293	Flagellar motor rotation protein MotB
Methylomonas sp. 11b	1.16817e+06	AZXK01000002	fig|1168169.3.peg.1293	250249	251613	1365	454	Flagellar hook-length control protein FliK
Methylomonas sp. 11b	1.16817e+06	AZXK01000002	fig|1168169.3.peg.1297	254130	255140	1011	336	Flagellar motor switch protein FliG
Methylomonas sp. 11b	1.16817e+06	AZXK01000002	fig|1168169.3.peg.1298	255133	256884	1752	583	Flagellar M-ring protein FliF
Methylomonas sp. 11b	1.16817e+06	AZXK01000002	fig|1168169.3.peg.1299	256903	257214	312	103	Flagellar hook-basal body complex protein FliE
Methylomonas sp. 11b	1.16817e+06	AZXK01000002	fig|1168169.3.peg.1300	257271	258653	1383	460	Flagellar two-component response regulator FleR
Methylomonas sp. 11b	1.16817e+06	AZXK01000002	fig|1168169.3.peg.1301	258640	259845	1206	401	Flagellar sensor histidine kinase FleS
Methylomonas sp. 11b	1.16817e+06	AZXK01000002	fig|1168169.3.peg.3853	2872217	2873884	1668	555	Flagellar hook-associated protein FlgK
Methylomonas sp. 11b	1.16817e+06	AZXK01000002	fig|1168169.3.peg.3854	2873894	2874940	1047	348	Flagellar protein FlgJ [peptidoglycan hydrolase]
Methylomonas sp. 11b	1.16817e+06	AZXK01000002	fig|1168169.3.peg.3855	2874986	2876071	1086	361	Flagellar P-ring protein FlgI
Methylomonas sp. 11b	1.16817e+06	AZXK01000002	fig|1168169.3.peg.3856	2876094	2876798	705	234	Flagellar L-ring protein FlgH
Methylomonas sp. 11b	1.16817e+06	AZXK01000002	fig|1168169.3.peg.3857	2876814	2877602	789	262	Flagellar basal-body rod protein FlgG
Methylomonas sp. 11b	1.16817e+06	AZXK01000002	fig|1168169.3.peg.3858	2877654	2878397	744	247	Flagellar basal-body rod protein FlgF
Methylomonas sp. 11b	1.16817e+06	AZXK01000002	fig|1168169.3.peg.3859	2878414	2879745	1332	443	Flagellar hook protein FlgE
Methylomonas sp. 11b	1.16817e+06	AZXK01000002	fig|1168169.3.peg.3860	2879759	2880439	681	226	Flagellar basal-body rod modification protein FlgD
Methylomonas sp. 11b	1.16817e+06	AZXK01000002	fig|1168169.3.peg.3861	2880447	2880863	417	138	Flagellar basal-body rod protein FlgC
Methylomonas sp. 11b	1.16817e+06	AZXK01000002	fig|1168169.3.peg.3862	2880866	2881309	444	147	Flagellar basal-body rod protein FlgB
Methylomonas sp. 11b	1.16817e+06	AZXK01000002	fig|1168169.3.peg.3865	2883395	2884084	690	229	Flagellar basal-body P-ring formation protein FlgA
Methylomonas sp. 11b	1.16817e+06	AZXK01000002	fig|1168169.3.peg.3869	2884992	2885771	780	259	Flagellar brake protein YcgR
Methylomonas sp. 11b	1.16817e+06	AZXK01000002	fig|1168169.3.peg.4394	3443440	3443724	285	94	Uncharacterized homolog of the cytoplasmic domain of flagellar protein FhlB
Methylomonas sp. 11b	1.16817e+06	AZXK01000002	fig|1168169.3.peg.4969	4080735	4081127	393	130	Similar to flagellar basal body-associated protein FliL
Methylomonas sp. 11b	1.16817e+06	AZXK01000002	fig|1168169.3.peg.4975	4085473	4087095	1623	540	Flagellar synthesis regulator FleN / Domain of unknown function
Methylomonas sp. 11b	1.16817e+06	AZXK01000002	fig|1168169.3.peg.1833	762790	763185	396	131	Flagellar basal-body rod protein FlgB
Methylomonas sp. 11b	1.16817e+06	AZXK01000002	fig|1168169.3.peg.2047	985753	986910	1158	385	Flagellar protein FlgT
Methylomonas koyamae JCM 16701	1.29426e+06	BBCK01000004	fig|1294261.13.peg.563	57962	58459	498	165	Flagellar protein FlgT
Methylomonas koyamae JCM 16701	1.29426e+06	BBCK01000005	fig|1294261.13.peg.674	46771	47973	1203	400	Flagellar sensor histidine kinase FleS
Methylomonas koyamae JCM 16701	1.29426e+06	BBCK01000005	fig|1294261.13.peg.675	47960	49312	1353	450	Flagellar two-component response regulator FleR
Methylomonas koyamae JCM 16701	1.29426e+06	BBCK01000005	fig|1294261.13.peg.676	49398	49709	312	103	Flagellar hook-basal body complex protein FliE
Methylomonas koyamae JCM 16701	1.29426e+06	BBCK01000005	fig|1294261.13.peg.677	49728	51470	1743	580	Flagellar M-ring protein FliF
Methylomonas koyamae JCM 16701	1.29426e+06	BBCK01000005	fig|1294261.13.peg.678	51463	52470	1008	335	Flagellar motor switch protein FliG
Methylomonas koyamae JCM 16701	1.29426e+06	BBCK01000005	fig|1294261.13.peg.680	52759	53163	405	134	Flagellar assembly protein FliH
Methylomonas koyamae JCM 16701	1.29426e+06	BBCK01000006	fig|1294261.13.peg.787	38715	39392	678	225	Flagellar regulatory protein FleQ
Methylomonas koyamae JCM 16701	1.29426e+06	BBCK01000006	fig|1294261.13.peg.788	39352	40125	774	257	Flagellar regulatory protein FleQ
Methylomonas koyamae JCM 16701	1.29426e+06	BBCK01000017	fig|1294261.13.peg.1720	12755	13039	285	94	Uncharacterized homolog of the cytoplasmic domain of flagellar protein FhlB
Methylomonas koyamae JCM 16701	1.29426e+06	BBCK01000019	fig|1294261.13.peg.1843	13314	15422	2109	702	hypothetical protein formerly called flagellar hook-length control protein FliK
Methylomonas koyamae JCM 16701	1.29426e+06	BBCK01000022	fig|1294261.13.peg.2086	27919	28803	885	294	Flagellar motor rotation protein MotB
Methylomonas koyamae JCM 16701	1.29426e+06	BBCK01000022	fig|1294261.13.peg.2087	28814	29560	747	248	Flagellar motor rotation protein MotA
Methylomonas koyamae JCM 16701	1.29426e+06	BBCK01000022	fig|1294261.13.peg.2093	33657	34043	387	128	Chemotaxis regulator - transmits chemoreceptor signals to flagellar motor components CheY
Methylomonas koyamae JCM 16701	1.29426e+06	BBCK01000022	fig|1294261.13.peg.2094	34132	34878	747	248	RNA polymerase sigma factor for flagellar operon
Methylomonas koyamae JCM 16701	1.29426e+06	BBCK01000022	fig|1294261.13.peg.2095	34875	35708	834	277	Flagellar synthesis regulator FleN
Methylomonas koyamae JCM 16701	1.29426e+06	BBCK01000022	fig|1294261.13.peg.2096	35740	37155	1416	471	Flagellar biosynthesis protein FlhF
Methylomonas koyamae JCM 16701	1.29426e+06	BBCK01000022	fig|1294261.13.peg.2097	37152	37505	354	117	Flagellar biosynthesis protein FlhA
Methylomonas koyamae JCM 16701	1.29426e+06	BBCK01000022	fig|1294261.13.peg.2098	37466	37663	198	65	Flagellar biosynthesis protein FlhA
Methylomonas koyamae JCM 16701	1.29426e+06	BBCK01000022	fig|1294261.13.peg.2099	37648	39267	1620	539	Flagellar biosynthesis protein FlhA
Methylomonas koyamae JCM 16701	1.29426e+06	BBCK01000022	fig|1294261.13.peg.2100	39286	40413	1128	375	Flagellar biosynthesis protein FlhB
Methylomonas koyamae JCM 16701	1.29426e+06	BBCK01000022	fig|1294261.13.peg.2101	40414	40803	390	129	Flagellar biosynthesis protein FliR
Methylomonas koyamae JCM 16701	1.29426e+06	BBCK01000022	fig|1294261.13.peg.2102	40800	41189	390	129	Flagellar biosynthesis protein FliR
Methylomonas koyamae JCM 16701	1.29426e+06	BBCK01000022	fig|1294261.13.peg.2103	41186	41455	270	89	Flagellar biosynthesis protein FliQ
Methylomonas koyamae JCM 16701	1.29426e+06	BBCK01000022	fig|1294261.13.peg.2104	41463	41750	288	95	Flagellar biosynthesis protein FliP
Methylomonas koyamae JCM 16701	1.29426e+06	BBCK01000022	fig|1294261.13.peg.2105	41719	42552	834	277	Flagellar biosynthesis protein FliP
Methylomonas koyamae JCM 16701	1.29426e+06	BBCK01000022	fig|1294261.13.peg.2106	42566	43096	531	176	Flagellar motor switch protein FliN
Methylomonas koyamae JCM 16701	1.29426e+06	BBCK01000022	fig|1294261.13.peg.2107	43116	44099	984	327	Flagellar motor switch protein FliM
Methylomonas koyamae JCM 16701	1.29426e+06	BBCK01000022	fig|1294261.13.peg.2108	44100	44279	180	59	Flagellar basal body-associated protein FliL
Methylomonas koyamae JCM 16701	1.29426e+06	BBCK01000022	fig|1294261.13.peg.2109	44302	44637	336	111	Flagellar basal body-associated protein FliL
Methylomonas koyamae JCM 16701	1.29426e+06	BBCK01000030	fig|1294261.13.peg.2516	11003	12682	1680	559	Flagellar hook-associated protein FlgK
Methylomonas koyamae JCM 16701	1.29426e+06	BBCK01000030	fig|1294261.13.peg.2517	12692	13744	1053	350	Flagellar protein FlgJ [peptidoglycan hydrolase]
Methylomonas koyamae JCM 16701	1.29426e+06	BBCK01000030	fig|1294261.13.peg.2518	13790	14128	339	112	Flagellar P-ring protein FlgI
Methylomonas koyamae JCM 16701	1.29426e+06	BBCK01000030	fig|1294261.13.peg.2519	14170	14328	159	52	Flagellar P-ring protein FlgI
Methylomonas koyamae JCM 16701	1.29426e+06	BBCK01000030	fig|1294261.13.peg.2520	14316	14510	195	64	Flagellar P-ring protein FlgI
Methylomonas koyamae JCM 16701	1.29426e+06	BBCK01000030	fig|1294261.13.peg.2521	14518	14871	354	117	Flagellar P-ring protein FlgI
Methylomonas koyamae JCM 16701	1.29426e+06	BBCK01000030	fig|1294261.13.peg.2522	14957	15607	651	216	Flagellar L-ring protein FlgH
Methylomonas koyamae JCM 16701	1.29426e+06	BBCK01000030	fig|1294261.13.peg.2523	15623	16411	789	262	Flagellar basal-body rod protein FlgG
Methylomonas koyamae JCM 16701	1.29426e+06	BBCK01000030	fig|1294261.13.peg.2524	16463	16939	477	158	Flagellar basal-body rod protein FlgF
Methylomonas koyamae JCM 16701	1.29426e+06	BBCK01000030	fig|1294261.13.peg.2525	16936	17205	270	89	Flagellar basal-body rod protein FlgF
Methylomonas koyamae JCM 16701	1.29426e+06	BBCK01000030	fig|1294261.13.peg.2526	17222	18547	1326	441	Flagellar hook protein FlgE
Methylomonas koyamae JCM 16701	1.29426e+06	BBCK01000030	fig|1294261.13.peg.2527	18559	19239	681	226	Flagellar basal-body rod modification protein FlgD
Methylomonas koyamae JCM 16701	1.29426e+06	BBCK01000030	fig|1294261.13.peg.2528	19243	19662	420	139	Flagellar basal-body rod protein FlgC
Methylomonas koyamae JCM 16701	1.29426e+06	BBCK01000030	fig|1294261.13.peg.2529	19665	20060	396	131	Flagellar basal-body rod protein FlgB
Methylomonas koyamae JCM 16701	1.29426e+06	BBCK01000030	fig|1294261.13.peg.2536	23778	24557	780	259	Flagellar brake protein YcgR
Methylomonas koyamae JCM 16701	1.29426e+06	BBCK01000033	fig|1294261.13.peg.2696	21402	21764	363	120	Chemotaxis regulator - transmits chemoreceptor signals to flagellar motor components CheY
Methylomonas koyamae JCM 16701	1.29426e+06	BBCK01000053	fig|1294261.13.peg.3574	13130	13537	408	135	Similar to flagellar basal body-associated protein FliL
Methylomonas koyamae JCM 16701	1.29426e+06	BBCK01000061	fig|1294261.13.peg.3859	4217	5023	807	268	Chemotaxis regulator - transmits chemoreceptor signals to flagellar motor components CheY
Methylomonas koyamae JCM 16701	1.29426e+06	BBCK01000061	fig|1294261.13.peg.3867	9669	9977	309	102	Chemotaxis regulator - transmits chemoreceptor signals to flagellar motor components CheY
Methylomonas koyamae JCM 16701	1.29426e+06	BBCK01000068	fig|1294261.13.peg.4104	17405	18184	780	259	Chemotaxis regulator - transmits chemoreceptor signals to flagellar motor components CheY
Methylomonas koyamae JCM 16701	1.29426e+06	BBCK01000071	fig|1294261.13.peg.4192	13957	15516	1560	519	hypothetical protein formerly called flagellar hook-length control protein FliK
Methylomonas koyamae JCM 16701	1.29426e+06	BBCK01000083	fig|1294261.13.peg.4544	3730	3993	264	87	Flagellar biosynthesis protein FliS
Methylomonas koyamae JCM 16701	1.29426e+06	BBCK01000083	fig|1294261.13.peg.4546	4329	5420	1092	363	Flagellar cap protein FliD
Methylomonas koyamae JCM 16701	1.29426e+06	BBCK01000083	fig|1294261.13.peg.4547	5427	5870	444	147	Flagellar protein FlaG
Methylomonas koyamae JCM 16701	1.29426e+06	BBCK01000088	fig|1294261.13.peg.4665	5979	6347	369	122	Chemotaxis regulator - transmits chemoreceptor signals to flagellar motor components CheY
Methylomonas koyamae JCM 16701	1.29426e+06	BBCK01000091	fig|1294261.13.peg.4759	14994	15452	459	152	Flagellar assembly factor FliW
Methylomonas koyamae JCM 16701	1.29426e+06	BBCK01000147	fig|1294261.13.peg.5674	6812	6955	144	47	Flagellar motor rotation protein MotA
Methylomonas koyamae JCM 16701	1.29426e+06	BBCK01000147	fig|1294261.13.peg.5675	7046	7639	594	197	Flagellar motor rotation protein MotA
Methylomonas koyamae JCM 16701	1.29426e+06	BBCK01000147	fig|1294261.13.peg.5676	7667	8140	474	157	Flagellar motor rotation protein MotB
Methylomonas koyamae JCM 16701	1.29426e+06	BBCK01000147	fig|1294261.13.peg.5677	8137	8568	432	144	Flagellar motor rotation protein MotB
Methylogaea LK_2	1.29538e+06	1295378.4.con.0004	fig|1295378.4.peg.313	35730	36542	813	270	Flagellar motor rotation protein MotA
Methylogaea LK_2	1.29538e+06	1295378.4.con.0004	fig|1295378.4.peg.314	36553	37590	1038	345	Flagellar motor rotation protein MotB
Methylogaea LK_2	1.29538e+06	1295378.4.con.0009	fig|1295378.4.peg.614	10665	11030	366	121	Chemotaxis regulator - transmits chemoreceptor signals to flagellar motor components CheY
Methylogaea LK_2	1.29538e+06	1295378.4.con.0012	fig|1295378.4.peg.806	31248	32720	1473	490	Flagellar regulatory protein FleQ
Methylogaea LK_2	1.29538e+06	1295378.4.con.0012	fig|1295378.4.peg.807	32733	33938	1206	401	Flagellar sensor histidine kinase FleS
Methylogaea LK_2	1.29538e+06	1295378.4.con.0012	fig|1295378.4.peg.808	33942	35291	1350	449	Flagellar two-component response regulator FleR
Methylogaea LK_2	1.29538e+06	1295378.4.con.0012	fig|1295378.4.peg.809	35355	35666	312	103	Flagellar hook-basal body complex protein FliE
Methylogaea LK_2	1.29538e+06	1295378.4.con.0012	fig|1295378.4.peg.810	35705	37426	1722	573	Flagellar M-ring protein FliF
Methylogaea LK_2	1.29538e+06	1295378.4.con.0012	fig|1295378.4.peg.811	37419	38432	1014	337	Flagellar motor switch protein FliG
Methylogaea LK_2	1.29538e+06	1295378.4.con.0018	fig|1295378.4.peg.1140	43028	43303	276	91	Uncharacterized homolog of the cytoplasmic domain of flagellar protein FhlB
Methylogaea LK_2	1.29538e+06	1295378.4.con.0034	fig|1295378.4.peg.1769	22719	23132	414	137	Flagellar biosynthesis protein FliS
Methylogaea LK_2	1.29538e+06	1295378.4.con.0034	fig|1295378.4.peg.1771	24522	24935	414	137	Flagellar protein FlaG
Methylogaea LK_2	1.29538e+06	1295378.4.con.0042	fig|1295378.4.peg.2002	13984	14907	924	307	Flagellar hook-associated protein FlgL
Methylogaea LK_2	1.29538e+06	1295378.4.con.0042	fig|1295378.4.peg.2003	14910	16592	1683	560	Flagellar hook-associated protein FlgK
Methylogaea LK_2	1.29538e+06	1295378.4.con.0042	fig|1295378.4.peg.2009	19550	20386	837	278	Flagellar motor rotation protein MotB
Methylogaea LK_2	1.29538e+06	1295378.4.con.0042	fig|1295378.4.peg.2010	20393	21139	747	248	Flagellar motor rotation protein MotA
Methylogaea LK_2	1.29538e+06	1295378.4.con.0042	fig|1295378.4.peg.2014	25313	25705	393	130	Chemotaxis regulator - transmits chemoreceptor signals to flagellar motor components CheY
Methylogaea LK_2	1.29538e+06	1295378.4.con.0042	fig|1295378.4.peg.2015	25744	26511	768	255	RNA polymerase sigma factor for flagellar operon
Methylogaea LK_2	1.29538e+06	1295378.4.con.0042	fig|1295378.4.peg.2016	26508	27347	840	279	Flagellar synthesis regulator FleN
Methylogaea LK_2	1.29538e+06	1295378.4.con.0042	fig|1295378.4.peg.2017	27376	28821	1446	481	Flagellar biosynthesis protein FlhF
Methylogaea LK_2	1.29538e+06	1295378.4.con.0042	fig|1295378.4.peg.2018	28873	29367	495	164	Flagellar biosynthesis protein FlhA
Methylogaea LK_2	1.29538e+06	1295378.4.con.0048	fig|1295378.4.peg.2160	1158	2264	1107	368	Flagellar P-ring protein FlgI
Methylogaea LK_2	1.29538e+06	1295378.4.con.0048	fig|1295378.4.peg.2161	2275	2985	711	236	Flagellar L-ring protein FlgH
Methylogaea LK_2	1.29538e+06	1295378.4.con.0048	fig|1295378.4.peg.2162	3003	3788	786	261	Flagellar basal-body rod protein FlgG
Methylogaea LK_2	1.29538e+06	1295378.4.con.0048	fig|1295378.4.peg.2163	3866	4606	741	246	Flagellar basal-body rod protein FlgF
Methylogaea LK_2	1.29538e+06	1295378.4.con.0048	fig|1295378.4.peg.2164	4627	5874	1248	415	Flagellar hook protein FlgE
Methylogaea LK_2	1.29538e+06	1295378.4.con.0048	fig|1295378.4.peg.2166	6577	7002	426	141	Flagellar basal-body rod protein FlgC
Methylogaea LK_2	1.29538e+06	1295378.4.con.0048	fig|1295378.4.peg.2167	7005	7403	399	132	Flagellar basal-body rod protein FlgB
Methylogaea LK_2	1.29538e+06	1295378.4.con.0048	fig|1295378.4.peg.2159	71	1144	1074	357	Flagellar protein FlgJ [peptidoglycan hydrolase]
Methylogaea LK_2	1.29538e+06	1295378.4.con.0070	fig|1295378.4.peg.2664	16094	16981	888	295	Flagellar motor rotation protein MotB
Methylogaea LK_2	1.29538e+06	1295378.4.con.0070	fig|1295378.4.peg.2665	16991	17848	858	285	Flagellar motor rotation protein MotA
Methylogaea LK_2	1.29538e+06	1295378.4.con.0086	fig|1295378.4.peg.2917	1555	1824	270	89	Flagellar biosynthesis protein FliQ
Methylogaea LK_2	1.29538e+06	1295378.4.con.0086	fig|1295378.4.peg.2918	1832	2575	744	247	Flagellar biosynthesis protein FliP
Methylogaea LK_2	1.29538e+06	1295378.4.con.0086	fig|1295378.4.peg.2915	3	371	369	123	Flagellar biosynthesis protein FlhB
Methylogaea LK_2	1.29538e+06	1295378.4.con.0086	fig|1295378.4.peg.2920	3018	3434	417	138	Flagellar motor switch protein FliN
Methylogaea LK_2	1.29538e+06	1295378.4.con.0086	fig|1295378.4.peg.2921	3570	4577	1008	335	Flagellar motor switch protein FliM
Methylogaea LK_2	1.29538e+06	1295378.4.con.0086	fig|1295378.4.peg.2916	381	1154	774	257	Flagellar biosynthesis protein FliR
Methylogaea LK_2	1.29538e+06	1295378.4.con.0152	fig|1295378.4.peg.3557	2630	3427	798	265	Chemotaxis regulator - transmits chemoreceptor signals to flagellar motor components CheY
Methylogaea oryzae strain E10	1.29538e+06	AP019782	fig|1295382.3.peg.1135	1161091	1161375	285	94	Uncharacterized homolog of the cytoplasmic domain of flagellar protein FhlB
Methylogaea oryzae strain E10	1.29538e+06	AP019782	fig|1295382.3.peg.1249	1318090	1318458	369	122	Chemotaxis regulator - transmits chemoreceptor signals to flagellar motor components CheY
Methylogaea oryzae strain E10	1.29538e+06	AP019782	fig|1295382.3.peg.1297	1372989	1373387	399	132	Flagellar basal-body rod protein FlgB
Methylogaea oryzae strain E10	1.29538e+06	AP019782	fig|1295382.3.peg.1298	1373390	1373821	432	143	Flagellar basal-body rod protein FlgC
Methylogaea oryzae strain E10	1.29538e+06	AP019782	fig|1295382.3.peg.1299	1373839	1374504	666	221	Flagellar basal-body rod modification protein FlgD
Methylogaea oryzae strain E10	1.29538e+06	AP019782	fig|1295382.3.peg.1300	1374515	1375834	1320	439	Flagellar hook protein FlgE
Methylogaea oryzae strain E10	1.29538e+06	AP019782	fig|1295382.3.peg.1301	1375866	1376609	744	247	Flagellar basal-body rod protein FlgF
Methylogaea oryzae strain E10	1.29538e+06	AP019782	fig|1295382.3.peg.1302	1376644	1377429	786	261	Flagellar basal-body rod protein FlgG
Methylogaea oryzae strain E10	1.29538e+06	AP019782	fig|1295382.3.peg.1303	1377447	1378166	720	239	Flagellar L-ring protein FlgH
Methylogaea oryzae strain E10	1.29538e+06	AP019782	fig|1295382.3.peg.1304	1378177	1379283	1107	368	Flagellar P-ring protein FlgI
Methylogaea oryzae strain E10	1.29538e+06	AP019782	fig|1295382.3.peg.1305	1379297	1380442	1146	381	Flagellar protein FlgJ [peptidoglycan hydrolase]
Methylogaea oryzae strain E10	1.29538e+06	AP019782	fig|1295382.3.peg.1941	2139438	2139803	366	121	Chemotaxis regulator - transmits chemoreceptor signals to flagellar motor components CheY
Methylogaea oryzae strain E10	1.29538e+06	AP019782	fig|1295382.3.peg.2153	2452712	2453659	948	315	Flagellar hook-associated protein FlgL
Methylogaea oryzae strain E10	1.29538e+06	AP019782	fig|1295382.3.peg.2154	2453673	2455358	1686	561	Flagellar hook-associated protein FlgK
Methylogaea oryzae strain E10	1.29538e+06	AP019782	fig|1295382.3.peg.2160	2458471	2459307	837	278	Flagellar motor rotation protein MotB
Methylogaea oryzae strain E10	1.29538e+06	AP019782	fig|1295382.3.peg.2161	2459314	2460060	747	248	Flagellar motor rotation protein MotA
Methylogaea oryzae strain E10	1.29538e+06	AP019782	fig|1295382.3.peg.2165	2464322	2464714	393	130	Chemotaxis regulator - transmits chemoreceptor signals to flagellar motor components CheY
Methylogaea oryzae strain E10	1.29538e+06	AP019782	fig|1295382.3.peg.2166	2464768	2465532	765	254	RNA polymerase sigma factor for flagellar operon
Methylogaea oryzae strain E10	1.29538e+06	AP019782	fig|1295382.3.peg.2167	2465529	2466410	882	293	Flagellar synthesis regulator FleN
Methylogaea oryzae strain E10	1.29538e+06	AP019782	fig|1295382.3.peg.2168	2466397	2467893	1497	498	Flagellar biosynthesis protein FlhF
Methylogaea oryzae strain E10	1.29538e+06	AP019782	fig|1295382.3.peg.2169	2467910	2470000	2091	696	Flagellar biosynthesis protein FlhA
Methylogaea oryzae strain E10	1.29538e+06	AP019782	fig|1295382.3.peg.2170	2470050	2471183	1134	377	Flagellar biosynthesis protein FlhB
Methylogaea oryzae strain E10	1.29538e+06	AP019782	fig|1295382.3.peg.2171	2471193	2471966	774	257	Flagellar biosynthesis protein FliR
Methylogaea oryzae strain E10	1.29538e+06	AP019782	fig|1295382.3.peg.2172	2471986	2472255	270	89	Flagellar biosynthesis protein FliQ
Methylogaea oryzae strain E10	1.29538e+06	AP019782	fig|1295382.3.peg.2173	2472263	2473006	744	247	Flagellar biosynthesis protein FliP
Methylogaea oryzae strain E10	1.29538e+06	AP019782	fig|1295382.3.peg.2174	2473003	2473521	519	172	Flagellar biosynthesis protein FliO
Methylogaea oryzae strain E10	1.29538e+06	AP019782	fig|1295382.3.peg.2175	2473518	2473952	435	144	Flagellar motor switch protein FliN
Methylogaea oryzae strain E10	1.29538e+06	AP019782	fig|1295382.3.peg.2176	2473970	2474977	1008	335	Flagellar motor switch protein FliM
Methylogaea oryzae strain E10	1.29538e+06	AP019782	fig|1295382.3.peg.2192	2492447	2493244	798	265	Chemotaxis regulator - transmits chemoreceptor signals to flagellar motor components CheY
Methylogaea oryzae strain E10	1.29538e+06	AP019782	fig|1295382.3.peg.2269	2581585	2581995	411	136	Flagellar biosynthesis protein FliS
Methylogaea oryzae strain E10	1.29538e+06	AP019782	fig|1295382.3.peg.2271	2583577	2583984	408	135	Flagellar protein FlaG
Methylogaea oryzae strain E10	1.29538e+06	AP019782	fig|1295382.3.peg.2807	3153392	3154192	801	266	Flagellar motor rotation protein MotA
Methylogaea oryzae strain E10	1.29538e+06	AP019782	fig|1295382.3.peg.2808	3154202	3155218	1017	338	Flagellar motor rotation protein MotB
Methylogaea oryzae strain E10	1.29538e+06	AP019782	fig|1295382.3.peg.3605	4000142	4001023	882	293	Flagellar motor rotation protein MotB
Methylogaea oryzae strain E10	1.29538e+06	AP019782	fig|1295382.3.peg.3606	4001038	4001913	876	291	Flagellar motor rotation protein MotA
Methylogaea oryzae strain E10	1.29538e+06	AP019782	fig|1295382.3.peg.855	875596	877005	1410	469	Flagellar regulatory protein FleQ
Methylogaea oryzae strain E10	1.29538e+06	AP019782	fig|1295382.3.peg.857	878237	879604	1368	455	Flagellar two-component response regulator FleR
Methylogaea oryzae strain E10	1.29538e+06	AP019782	fig|1295382.3.peg.858	879669	879980	312	103	Flagellar hook-basal body complex protein FliE
Methylogaea oryzae strain E10	1.29538e+06	AP019782	fig|1295382.3.peg.859	880019	881725	1707	568	Flagellar M-ring protein FliF
Methylogaea oryzae strain E10	1.29538e+06	AP019782	fig|1295382.3.peg.860	881718	882728	1011	336	Flagellar motor switch protein FliG
Methylogaea oryzae strain E10	1.29538e+06	AP019782	fig|1295382.3.peg.861	882715	883464	750	249	Flagellar assembly protein FliH
Methylobacter tundripaludum 21/22	1.40845e+06	JMLA01000001	fig|1408450.3.peg.1673	1769056	1769511	456	151	Flagellar assembly factor FliW
Methylobacter tundripaludum 21/22	1.40845e+06	JMLA01000001	fig|1408450.3.peg.2288	2516026	2517477	1452	483	Flagellar regulatory protein FleQ
Methylobacter tundripaludum 21/22	1.40845e+06	JMLA01000001	fig|1408450.3.peg.2289	2517605	2518858	1254	417	Flagellar sensor histidine kinase FleS
Methylobacter tundripaludum 21/22	1.40845e+06	JMLA01000001	fig|1408450.3.peg.2290	2518845	2520251	1407	468	Flagellar two-component response regulator FleR
Methylobacter tundripaludum 21/22	1.40845e+06	JMLA01000001	fig|1408450.3.peg.2291	2520311	2520625	315	104	Flagellar hook-basal body complex protein FliE
Methylobacter tundripaludum 21/22	1.40845e+06	JMLA01000001	fig|1408450.3.peg.2292	2520648	2522477	1830	609	Flagellar M-ring protein FliF
Methylobacter tundripaludum 21/22	1.40845e+06	JMLA01000001	fig|1408450.3.peg.2293	2522470	2523477	1008	335	Flagellar motor switch protein FliG
Methylobacter tundripaludum 21/22	1.40845e+06	JMLA01000001	fig|1408450.3.peg.2294	2523527	2524255	729	242	Flagellar assembly protein FliH
Methylobacter tundripaludum 21/22	1.40845e+06	JMLA01000001	fig|1408450.3.peg.2384	2627837	2628832	996	331	Flagellar motor switch protein FliM
Methylobacter tundripaludum 21/22	1.40845e+06	JMLA01000001	fig|1408450.3.peg.2385	2628888	2629268	381	126	Flagellar motor switch protein FliN
Methylobacter tundripaludum 21/22	1.40845e+06	JMLA01000001	fig|1408450.3.peg.2386	2629268	2629711	444	147	Flagellar biosynthesis protein FliO
Methylobacter tundripaludum 21/22	1.40845e+06	JMLA01000001	fig|1408450.3.peg.2387	2629704	2630462	759	252	Flagellar biosynthesis protein FliP
Methylobacter tundripaludum 21/22	1.40845e+06	JMLA01000001	fig|1408450.3.peg.2388	2630479	2630748	270	89	Flagellar biosynthesis protein FliQ
Methylobacter tundripaludum 21/22	1.40845e+06	JMLA01000001	fig|1408450.3.peg.2389	2630752	2631525	774	257	Flagellar biosynthesis protein FliR
Methylobacter tundripaludum 21/22	1.40845e+06	JMLA01000001	fig|1408450.3.peg.2390	2631533	2632657	1125	374	Flagellar biosynthesis protein FlhB
Methylobacter tundripaludum 21/22	1.40845e+06	JMLA01000001	fig|1408450.3.peg.2391	2632664	2634763	2100	699	Flagellar biosynthesis protein FlhA
Methylobacter tundripaludum 21/22	1.40845e+06	JMLA01000001	fig|1408450.3.peg.2392	2634780	2636258	1479	492	Flagellar biosynthesis protein FlhF
Methylobacter tundripaludum 21/22	1.40845e+06	JMLA01000001	fig|1408450.3.peg.2393	2636290	2637123	834	277	Flagellar synthesis regulator FleN
Methylobacter tundripaludum 21/22	1.40845e+06	JMLA01000001	fig|1408450.3.peg.2394	2637135	2637848	714	237	RNA polymerase sigma factor for flagellar operon	GO:0003677|DNA binding;GO:0003700|transcription factor activity;GO:0006352|transcription initiation;GO:0016987|sigma factor activity
Methylobacter tundripaludum 21/22	1.40845e+06	JMLA01000001	fig|1408450.3.peg.2395	2637867	2638622	756	251	Flagellar motor rotation protein MotA
Methylobacter tundripaludum 21/22	1.40845e+06	JMLA01000001	fig|1408450.3.peg.2396	2638680	2639477	798	265	Flagellar motor rotation protein MotB
Methylobacter tundripaludum 21/22	1.40845e+06	JMLA01000001	fig|1408450.3.peg.2477	2712120	2712590	471	156	Flagellar basal-body rod protein FlgB
Methylobacter tundripaludum 21/22	1.40845e+06	JMLA01000001	fig|1408450.3.peg.2846	3110942	3111331	390	129	Chemotaxis regulator - transmits chemoreceptor signals to flagellar motor components CheY
Methylobacter tundripaludum 21/22	1.40845e+06	JMLA01000001	fig|1408450.3.peg.3198	3470653	3471561	909	302	Flagellar motor rotation protein MotB
Methylobacter tundripaludum 21/22	1.40845e+06	JMLA01000001	fig|1408450.3.peg.3199	3471570	3472418	849	282	Flagellar motor rotation protein MotA
Methylobacter tundripaludum 21/22	1.40845e+06	JMLA01000001	fig|1408450.3.peg.3343	3623059	3623997	939	312	Flagellar motor rotation protein MotB
Methylobacter tundripaludum 21/22	1.40845e+06	JMLA01000001	fig|1408450.3.peg.3344	3624060	3624872	813	270	Flagellar motor rotation protein MotA
Methylobacter tundripaludum 21/22	1.40845e+06	JMLA01000001	fig|1408450.3.peg.3395	3675381	3675734	354	117	Chemotaxis regulator - transmits chemoreceptor signals to flagellar motor components CheY
Methylobacter tundripaludum 21/22	1.40845e+06	JMLA01000001	fig|1408450.3.peg.368	394981	395445	465	154	Similar to flagellar basal body-associated protein FliL
Methylobacter tundripaludum 21/22	1.40845e+06	JMLA01000001	fig|1408450.3.peg.3667	3994631	3994915	285	94	Uncharacterized homolog of the cytoplasmic domain of flagellar protein FhlB
Methylobacter tundripaludum 21/22	1.40845e+06	JMLA01000001	fig|1408450.3.peg.4248	4624702	4625064	363	120	Chemotaxis regulator - transmits chemoreceptor signals to flagellar motor components CheY
Methylobacter tundripaludum 21/22	1.40845e+06	JMLA01000001	fig|1408450.3.peg.563	601543	603381	1839	612	Flagellar hook-associated protein FlgK
Methylobacter tundripaludum 21/22	1.40845e+06	JMLA01000001	fig|1408450.3.peg.564	603425	604477	1053	350	Flagellar protein FlgJ [peptidoglycan hydrolase]
Methylobacter tundripaludum 21/22	1.40845e+06	JMLA01000001	fig|1408450.3.peg.565	604507	605610	1104	367	Flagellar P-ring protein FlgI
Methylobacter tundripaludum 21/22	1.40845e+06	JMLA01000001	fig|1408450.3.peg.566	605626	606336	711	236	Flagellar L-ring protein FlgH
Methylobacter tundripaludum 21/22	1.40845e+06	JMLA01000001	fig|1408450.3.peg.567	606352	607140	789	262	Flagellar basal-body rod protein FlgG
Methylobacter tundripaludum 21/22	1.40845e+06	JMLA01000001	fig|1408450.3.peg.568	607296	608036	741	246	Flagellar basal-body rod protein FlgF
Methylobacter tundripaludum 21/22	1.40845e+06	JMLA01000001	fig|1408450.3.peg.569	608118	609905	1788	595	Flagellar hook protein FlgE
Methylobacter tundripaludum 21/22	1.40845e+06	JMLA01000001	fig|1408450.3.peg.570	609902	610597	696	231	Flagellar basal-body rod modification protein FlgD
Methylobacter tundripaludum 21/22	1.40845e+06	JMLA01000001	fig|1408450.3.peg.571	610608	611024	417	138	Flagellar basal-body rod protein FlgC
Methylobacter tundripaludum 21/22	1.40845e+06	JMLA01000001	fig|1408450.3.peg.572	611027	611419	393	130	Flagellar basal-body rod protein FlgB
Methylobacter tundripaludum 21/22	1.40845e+06	JMLA01000001	fig|1408450.3.peg.575	612787	613281	495	164	Flagellar biosynthesis protein FlgN
Methylobacter tundripaludum 21/22	1.40845e+06	JMLA01000001	fig|1408450.3.peg.596	634672	635061	390	129	Flagellar biosynthesis protein FliS
Methylobacter tundripaludum 21/22	1.40845e+06	JMLA01000001	fig|1408450.3.peg.597	635077	636465	1389	462	Flagellar cap protein FliD
Methylobacter tundripaludum 31/32	1.40845e+06	JPOH01000001	fig|1408451.3.peg.1340	1465117	1465581	465	154	Similar to flagellar basal body-associated protein FliL
Methylobacter tundripaludum 31/32	1.40845e+06	JPOH01000001	fig|1408451.3.peg.131	165034	165318	285	94	Uncharacterized homolog of the cytoplasmic domain of flagellar protein FhlB
Methylobacter tundripaludum 31/32	1.40845e+06	JPOH01000001	fig|1408451.3.peg.1799	1921485	1923323	1839	612	Flagellar hook-associated protein FlgK
Methylobacter tundripaludum 31/32	1.40845e+06	JPOH01000001	fig|1408451.3.peg.1800	1923367	1924419	1053	350	Flagellar protein FlgJ [peptidoglycan hydrolase]
Methylobacter tundripaludum 31/32	1.40845e+06	JPOH01000001	fig|1408451.3.peg.1801	1924449	1925552	1104	367	Flagellar P-ring protein FlgI
Methylobacter tundripaludum 31/32	1.40845e+06	JPOH01000001	fig|1408451.3.peg.1802	1925568	1926278	711	236	Flagellar L-ring protein FlgH
Methylobacter tundripaludum 31/32	1.40845e+06	JPOH01000001	fig|1408451.3.peg.1803	1926294	1927082	789	262	Flagellar basal-body rod protein FlgG
Methylobacter tundripaludum 31/32	1.40845e+06	JPOH01000001	fig|1408451.3.peg.1804	1927238	1927978	741	246	Flagellar basal-body rod protein FlgF
Methylobacter tundripaludum 31/32	1.40845e+06	JPOH01000001	fig|1408451.3.peg.1805	1928060	1929847	1788	595	Flagellar hook protein FlgE
Methylobacter tundripaludum 31/32	1.40845e+06	JPOH01000001	fig|1408451.3.peg.1806	1929844	1930539	696	231	Flagellar basal-body rod modification protein FlgD
Methylobacter tundripaludum 31/32	1.40845e+06	JPOH01000001	fig|1408451.3.peg.1807	1930550	1930966	417	138	Flagellar basal-body rod protein FlgC
Methylobacter tundripaludum 31/32	1.40845e+06	JPOH01000001	fig|1408451.3.peg.1808	1930969	1931361	393	130	Flagellar basal-body rod protein FlgB
Methylobacter tundripaludum 31/32	1.40845e+06	JPOH01000001	fig|1408451.3.peg.1811	1932729	1933223	495	164	Flagellar biosynthesis protein FlgN
Methylobacter tundripaludum 31/32	1.40845e+06	JPOH01000001	fig|1408451.3.peg.1834	1954601	1954990	390	129	Flagellar biosynthesis protein FliS
Methylobacter tundripaludum 31/32	1.40845e+06	JPOH01000001	fig|1408451.3.peg.1835	1955006	1956394	1389	462	Flagellar cap protein FliD
Methylobacter tundripaludum 31/32	1.40845e+06	JPOH01000001	fig|1408451.3.peg.2913	3085064	3085519	456	151	Flagellar assembly factor FliW
Methylobacter tundripaludum 31/32	1.40845e+06	JPOH01000001	fig|1408451.3.peg.3545	3845829	3847280	1452	483	Flagellar regulatory protein FleQ
Methylobacter tundripaludum 31/32	1.40845e+06	JPOH01000001	fig|1408451.3.peg.3546	3847408	3848661	1254	417	Flagellar sensor histidine kinase FleS
Methylobacter tundripaludum 31/32	1.40845e+06	JPOH01000001	fig|1408451.3.peg.3547	3848648	3850054	1407	468	Flagellar two-component response regulator FleR
Methylobacter tundripaludum 31/32	1.40845e+06	JPOH01000001	fig|1408451.3.peg.3548	3850114	3850428	315	104	Flagellar hook-basal body complex protein FliE
Methylobacter tundripaludum 31/32	1.40845e+06	JPOH01000001	fig|1408451.3.peg.3549	3850451	3852214	1764	587	Flagellar M-ring protein FliF
Methylobacter tundripaludum 31/32	1.40845e+06	JPOH01000001	fig|1408451.3.peg.3550	3852278	3853285	1008	335	Flagellar motor switch protein FliG
Methylobacter tundripaludum 31/32	1.40845e+06	JPOH01000001	fig|1408451.3.peg.3551	3853335	3854063	729	242	Flagellar assembly protein FliH
Methylobacter tundripaludum 31/32	1.40845e+06	JPOH01000001	fig|1408451.3.peg.3554	3855949	3857472	1524	507	Flagellar hook-length control protein FliK
Methylobacter tundripaludum 31/32	1.40845e+06	JPOH01000001	fig|1408451.3.peg.3646	3959673	3960668	996	331	Flagellar motor switch protein FliM
Methylobacter tundripaludum 31/32	1.40845e+06	JPOH01000001	fig|1408451.3.peg.3647	3960724	3961104	381	126	Flagellar motor switch protein FliN
Methylobacter tundripaludum 31/32	1.40845e+06	JPOH01000001	fig|1408451.3.peg.3648	3961104	3961547	444	147	Flagellar biosynthesis protein FliO
Methylobacter tundripaludum 31/32	1.40845e+06	JPOH01000001	fig|1408451.3.peg.3649	3961552	3962298	747	248	Flagellar biosynthesis protein FliP
Methylobacter tundripaludum 31/32	1.40845e+06	JPOH01000001	fig|1408451.3.peg.3650	3962315	3962584	270	89	Flagellar biosynthesis protein FliQ
Methylobacter tundripaludum 31/32	1.40845e+06	JPOH01000001	fig|1408451.3.peg.3651	3962588	3963361	774	257	Flagellar biosynthesis protein FliR
Methylobacter tundripaludum 31/32	1.40845e+06	JPOH01000001	fig|1408451.3.peg.3652	3963369	3964493	1125	374	Flagellar biosynthesis protein FlhB
Methylobacter tundripaludum 31/32	1.40845e+06	JPOH01000001	fig|1408451.3.peg.3653	3964500	3966599	2100	699	Flagellar biosynthesis protein FlhA
Methylobacter tundripaludum 31/32	1.40845e+06	JPOH01000001	fig|1408451.3.peg.3654	3966616	3968043	1428	475	Flagellar biosynthesis protein FlhF
Methylobacter tundripaludum 31/32	1.40845e+06	JPOH01000001	fig|1408451.3.peg.3655	3968036	3968908	873	290	Flagellar synthesis regulator FleN
Methylobacter tundripaludum 31/32	1.40845e+06	JPOH01000001	fig|1408451.3.peg.3656	3968905	3969633	729	242	RNA polymerase sigma factor for flagellar operon	GO:0003677|DNA binding;GO:0003700|transcription factor activity;GO:0006352|transcription initiation;GO:0016987|sigma factor activity
Methylobacter tundripaludum 31/32	1.40845e+06	JPOH01000001	fig|1408451.3.peg.3657	3969652	3970407	756	251	Flagellar motor rotation protein MotA
Methylobacter tundripaludum 31/32	1.40845e+06	JPOH01000001	fig|1408451.3.peg.3658	3970465	3971262	798	265	Flagellar motor rotation protein MotB
Methylobacter tundripaludum 31/32	1.40845e+06	JPOH01000001	fig|1408451.3.peg.3929	4219752	4220141	390	129	Chemotaxis regulator - transmits chemoreceptor signals to flagellar motor components CheY
Methylobacter tundripaludum 31/32	1.40845e+06	JPOH01000001	fig|1408451.3.peg.4289	4577307	4578215	909	302	Flagellar motor rotation protein MotB
Methylobacter tundripaludum 31/32	1.40845e+06	JPOH01000001	fig|1408451.3.peg.4290	4578224	4579072	849	282	Flagellar motor rotation protein MotA
Methylobacter tundripaludum 31/32	1.40845e+06	JPOH01000001	fig|1408451.3.peg.4500	4817241	4818179	939	312	Flagellar motor rotation protein MotB
Methylobacter tundripaludum 31/32	1.40845e+06	JPOH01000001	fig|1408451.3.peg.4501	4818242	4819075	834	277	Flagellar motor rotation protein MotA
Methylobacter tundripaludum 31/32	1.40845e+06	JPOH01000001	fig|1408451.3.peg.4552	4868749	4869102	354	117	Chemotaxis regulator - transmits chemoreceptor signals to flagellar motor components CheY
Methylobacter tundripaludum 31/32	1.40845e+06	JPOH01000001	fig|1408451.3.peg.697	783067	783429	363	120	Chemotaxis regulator - transmits chemoreceptor signals to flagellar motor components CheY
Methyloterricola oryzae strain 73a	1.49505e+06	JYNS01000001	fig|1495050.5.peg.417	472715	473554	840	279	Flagellar motor rotation protein MotB
Methyloterricola oryzae strain 73a	1.49505e+06	JYNS01000001	fig|1495050.5.peg.418	473554	474315	762	253	Flagellar motor rotation protein MotA
Methyloterricola oryzae strain 73a	1.49505e+06	JYNS01000001	fig|1495050.5.peg.419	474385	475146	762	253	RNA polymerase sigma factor for flagellar operon
Methyloterricola oryzae strain 73a	1.49505e+06	JYNS01000001	fig|1495050.5.peg.420	475158	475988	831	276	Flagellar synthesis regulator FleN
Methyloterricola oryzae strain 73a	1.49505e+06	JYNS01000001	fig|1495050.5.peg.421	476017	477366	1350	449	Flagellar biosynthesis protein FlhF
Methyloterricola oryzae strain 73a	1.49505e+06	JYNS01000001	fig|1495050.5.peg.422	477385	479478	2094	697	Flagellar biosynthesis protein FlhA
Methyloterricola oryzae strain 73a	1.49505e+06	JYNS01000001	fig|1495050.5.peg.423	479525	480661	1137	378	Flagellar biosynthesis protein FlhB
Methyloterricola oryzae strain 73a	1.49505e+06	JYNS01000001	fig|1495050.5.peg.424	480674	481444	771	256	Flagellar biosynthesis protein FliR
Methyloterricola oryzae strain 73a	1.49505e+06	JYNS01000001	fig|1495050.5.peg.425	481455	481724	270	89	Flagellar biosynthesis protein FliQ
Methyloterricola oryzae strain 73a	1.49505e+06	JYNS01000001	fig|1495050.5.peg.426	481731	482492	762	253	Flagellar biosynthesis protein FliP
Methyloterricola oryzae strain 73a	1.49505e+06	JYNS01000001	fig|1495050.5.peg.427	482489	482905	417	138	Flagellar biosynthesis protein FliO
Methyloterricola oryzae strain 73a	1.49505e+06	JYNS01000001	fig|1495050.5.peg.428	482902	483330	429	142	Flagellar motor switch protein FliN
Methyloterricola oryzae strain 73a	1.49505e+06	JYNS01000001	fig|1495050.5.peg.429	483346	484365	1020	339	Flagellar motor switch protein FliM
Methyloterricola oryzae strain 73a	1.49505e+06	JYNS01000001	fig|1495050.5.peg.432	485858	486247	390	129	Chemotaxis regulator - transmits chemoreceptor signals to flagellar motor components CheY
Methyloterricola oryzae strain 73a	1.49505e+06	JYNS01000001	fig|1495050.5.peg.441	498860	499225	366	121	Chemotaxis regulator - transmits chemoreceptor signals to flagellar motor components CheY
Methyloterricola oryzae strain 73a	1.49505e+06	JYNS01000001	fig|1495050.5.peg.671	727534	728388	855	284	Flagellar motor rotation protein MotA
Methyloterricola oryzae strain 73a	1.49505e+06	JYNS01000001	fig|1495050.5.peg.672	728413	729411	999	332	Flagellar motor rotation protein MotB
Methyloterricola oryzae strain 73a	1.49505e+06	JYNS01000003	fig|1495050.5.peg.1315	22716	23084	369	122	Chemotaxis regulator - transmits chemoreceptor signals to flagellar motor components CheY
Methyloterricola oryzae strain 73a	1.49505e+06	JYNS01000004	fig|1495050.5.peg.1623	78911	79186	276	91	Uncharacterized homolog of the cytoplasmic domain of flagellar protein FhlB
Methyloterricola oryzae strain 73a	1.49505e+06	JYNS01000007	fig|1495050.5.peg.2435	192785	194461	1677	558	Flagellar hook-associated protein FlgK
Methyloterricola oryzae strain 73a	1.49505e+06	JYNS01000007	fig|1495050.5.peg.2436	194534	195490	957	318	Flagellar protein FlgJ [peptidoglycan hydrolase]
Methyloterricola oryzae strain 73a	1.49505e+06	JYNS01000007	fig|1495050.5.peg.2437	195501	196628	1128	375	Flagellar P-ring protein FlgI
Methyloterricola oryzae strain 73a	1.49505e+06	JYNS01000007	fig|1495050.5.peg.2438	196653	197330	678	225	Flagellar L-ring protein FlgH
Methyloterricola oryzae strain 73a	1.49505e+06	JYNS01000007	fig|1495050.5.peg.2439	197344	198132	789	262	Flagellar basal-body rod protein FlgG
Methyloterricola oryzae strain 73a	1.49505e+06	JYNS01000007	fig|1495050.5.peg.2440	198159	198899	741	246	Flagellar basal-body rod protein FlgF
Methyloterricola oryzae strain 73a	1.49505e+06	JYNS01000007	fig|1495050.5.peg.2441	198929	200287	1359	452	Flagellar hook protein FlgE
Methyloterricola oryzae strain 73a	1.49505e+06	JYNS01000007	fig|1495050.5.peg.2443	201004	201438	435	144	Flagellar basal-body rod protein FlgC
Methyloterricola oryzae strain 73a	1.49505e+06	JYNS01000007	fig|1495050.5.peg.2444	201441	201839	399	132	Flagellar basal-body rod protein FlgB
Methyloterricola oryzae strain 73a	1.49505e+06	JYNS01000008	fig|1495050.5.peg.2486	18035	19036	1002	333	Flagellar motor switch protein FliG
Methyloterricola oryzae strain 73a	1.49505e+06	JYNS01000008	fig|1495050.5.peg.2487	19029	20825	1797	598	Flagellar M-ring protein FliF
Methyloterricola oryzae strain 73a	1.49505e+06	JYNS01000008	fig|1495050.5.peg.2488	20855	21169	315	104	Flagellar hook-basal body complex protein FliE
Methyloterricola oryzae strain 73a	1.49505e+06	JYNS01000008	fig|1495050.5.peg.2489	21350	22705	1356	451	Flagellar two-component response regulator FleR
Methyloterricola oryzae strain 73a	1.49505e+06	JYNS01000008	fig|1495050.5.peg.2490	22692	23921	1230	409	Flagellar sensor histidine kinase FleS
Methyloterricola oryzae strain 73a	1.49505e+06	JYNS01000008	fig|1495050.5.peg.2491	24023	25465	1443	480	Flagellar regulatory protein FleQ
Methyloterricola oryzae strain 73a	1.49505e+06	JYNS01000008	fig|1495050.5.peg.2493	25859	26890	1032	343	hypothetical protein formerly called flagellar hook-length control protein FliK
Methyloterricola oryzae strain 73a	1.49505e+06	JYNS01000008	fig|1495050.5.peg.2550	80170	80634	465	154	Flagellar assembly factor FliW
Methyloterricola oryzae strain 73a	1.49505e+06	JYNS01000011	fig|1495050.5.peg.3088	81707	82141	435	144	Flagellar biosynthesis protein FliS
Methyloterricola oryzae strain 73a	1.49505e+06	JYNS01000011	fig|1495050.5.peg.3089	82191	84218	2028	675	Flagellar cap protein FliD
Methyloterricola oryzae strain 73a	1.49505e+06	JYNS01000013	fig|1495050.5.peg.3324	47194	48000	807	268	Flagellar motor rotation protein MotA
Methyloterricola oryzae strain 73a	1.49505e+06	JYNS01000013	fig|1495050.5.peg.3325	48020	48922	903	300	Flagellar motor rotation protein MotB
Methylobacter sp. BBA5.1	1.49506e+06	JQKS01000006	fig|1495064.3.peg.1259	185791	187065	1275	424	Flagellar hook-associated protein FlgL
Methylobacter sp. BBA5.1	1.49506e+06	JQKS01000006	fig|1495064.3.peg.1260	187075	188748	1674	557	Flagellar hook-associated protein FlgK
Methylobacter sp. BBA5.1	1.49506e+06	JQKS01000006	fig|1495064.3.peg.1261	188791	189780	990	329	Flagellar protein FlgJ [peptidoglycan hydrolase]
Methylobacter sp. BBA5.1	1.49506e+06	JQKS01000006	fig|1495064.3.peg.1262	189791	190888	1098	365	Flagellar P-ring protein FlgI
Methylobacter sp. BBA5.1	1.49506e+06	JQKS01000006	fig|1495064.3.peg.1263	190903	191574	672	223	Flagellar L-ring protein FlgH
Methylobacter sp. BBA5.1	1.49506e+06	JQKS01000006	fig|1495064.3.peg.1264	191588	192376	789	262	Flagellar basal-body rod protein FlgG
Methylobacter sp. BBA5.1	1.49506e+06	JQKS01000006	fig|1495064.3.peg.1265	192427	193167	741	246	Flagellar basal-body rod protein FlgF
Methylobacter sp. BBA5.1	1.49506e+06	JQKS01000006	fig|1495064.3.peg.1266	193190	194488	1299	432	Flagellar hook protein FlgE
Methylobacter sp. BBA5.1	1.49506e+06	JQKS01000006	fig|1495064.3.peg.1267	194504	195175	672	223	Flagellar basal-body rod modification protein FlgD
Methylobacter sp. BBA5.1	1.49506e+06	JQKS01000006	fig|1495064.3.peg.1268	195189	195605	417	138	Flagellar basal-body rod protein FlgC
Methylobacter sp. BBA5.1	1.49506e+06	JQKS01000006	fig|1495064.3.peg.1269	195608	196000	393	130	Flagellar basal-body rod protein FlgB
Methylobacter sp. BBA5.1	1.49506e+06	JQKS01000006	fig|1495064.3.peg.1273	197396	197896	501	166	Flagellar biosynthesis protein FlgN
Methylobacter sp. BBA5.1	1.49506e+06	JQKS01000007	fig|1495064.3.peg.1321	54800	55162	363	120	Chemotaxis regulator - transmits chemoreceptor signals to flagellar motor components CheY
Methylobacter sp. BBA5.1	1.49506e+06	JQKS01000008	fig|1495064.3.peg.1544	103906	104190	285	94	Uncharacterized homolog of the cytoplasmic domain of flagellar protein FhlB
Methylobacter sp. BBA5.1	1.49506e+06	JQKS01000015	fig|1495064.3.peg.2432	102743	103618	876	291	Flagellar motor rotation protein MotB
Methylobacter sp. BBA5.1	1.49506e+06	JQKS01000015	fig|1495064.3.peg.2433	103625	104383	759	252	Flagellar motor rotation protein MotA
Methylobacter sp. BBA5.1	1.49506e+06	JQKS01000016	fig|1495064.3.peg.2580	100154	100423	270	89	Flagellar biosynthesis protein FliQ
Methylobacter sp. BBA5.1	1.49506e+06	JQKS01000016	fig|1495064.3.peg.2581	100436	101176	741	246	Flagellar biosynthesis protein FliP
Methylobacter sp. BBA5.1	1.49506e+06	JQKS01000016	fig|1495064.3.peg.2582	101169	101591	423	140	Flagellar biosynthesis protein FliO
Methylobacter sp. BBA5.1	1.49506e+06	JQKS01000016	fig|1495064.3.peg.2583	101591	101968	378	125	Flagellar motor switch protein FliN
Methylobacter sp. BBA5.1	1.49506e+06	JQKS01000016	fig|1495064.3.peg.2584	102011	103012	1002	333	Flagellar motor switch protein FliM
Methylobacter sp. BBA5.1	1.49506e+06	JQKS01000016	fig|1495064.3.peg.2585	103014	103499	486	161	Flagellar basal body-associated protein FliL
Methylobacter sp. BBA5.1	1.49506e+06	JQKS01000016	fig|1495064.3.peg.2548	66965	67780	816	271	Flagellar assembly protein FliH
Methylobacter sp. BBA5.1	1.49506e+06	JQKS01000016	fig|1495064.3.peg.2549	67767	68771	1005	334	Flagellar motor switch protein FliG
Methylobacter sp. BBA5.1	1.49506e+06	JQKS01000016	fig|1495064.3.peg.2550	68764	70488	1725	574	Flagellar M-ring protein FliF
Methylobacter sp. BBA5.1	1.49506e+06	JQKS01000016	fig|1495064.3.peg.2551	70510	70824	315	104	Flagellar hook-basal body complex protein FliE
Methylobacter sp. BBA5.1	1.49506e+06	JQKS01000016	fig|1495064.3.peg.2552	70884	72272	1389	462	Flagellar two-component response regulator FleR
Methylobacter sp. BBA5.1	1.49506e+06	JQKS01000016	fig|1495064.3.peg.2553	72269	73492	1224	407	Flagellar sensor histidine kinase FleS
Methylobacter sp. BBA5.1	1.49506e+06	JQKS01000016	fig|1495064.3.peg.2554	73601	75070	1470	489	Flagellar regulatory protein FleQ
Methylobacter sp. BBA5.1	1.49506e+06	JQKS01000016	fig|1495064.3.peg.2572	91485	92339	855	284	Flagellar motor rotation protein MotB
Methylobacter sp. BBA5.1	1.49506e+06	JQKS01000016	fig|1495064.3.peg.2573	92342	93097	756	251	Flagellar motor rotation protein MotA
Methylobacter sp. BBA5.1	1.49506e+06	JQKS01000016	fig|1495064.3.peg.2574	93121	93843	723	240	RNA polymerase sigma factor for flagellar operon	GO:0003677|DNA binding;GO:0003700|transcription factor activity;GO:0006352|transcription initiation;GO:0016987|sigma factor activity
Methylobacter sp. BBA5.1	1.49506e+06	JQKS01000016	fig|1495064.3.peg.2575	93855	94727	873	290	Flagellar synthesis regulator FleN
Methylobacter sp. BBA5.1	1.49506e+06	JQKS01000016	fig|1495064.3.peg.2576	94720	96126	1407	468	Flagellar biosynthesis protein FlhF
Methylobacter sp. BBA5.1	1.49506e+06	JQKS01000016	fig|1495064.3.peg.2577	96141	98201	2061	686	Flagellar biosynthesis protein FlhA
Methylobacter sp. BBA5.1	1.49506e+06	JQKS01000016	fig|1495064.3.peg.2578	98242	99372	1131	376	Flagellar biosynthesis protein FlhB
Methylobacter sp. BBA5.1	1.49506e+06	JQKS01000016	fig|1495064.3.peg.2579	99376	100149	774	257	Flagellar biosynthesis protein FliR
Methylobacter sp. BBA5.1	1.49506e+06	JQKS01000018	fig|1495064.3.peg.2796	42274	42666	393	130	Similar to flagellar basal body-associated protein FliL
Methylobacter sp. BBA5.1	1.49506e+06	JQKS01000024	fig|1495064.3.peg.3404	19713	20102	390	129	Chemotaxis regulator - transmits chemoreceptor signals to flagellar motor components CheY
Methylobacter sp. BBA5.1	1.49506e+06	JQKS01000045	fig|1495064.3.peg.4486	8072	9706	1635	544	Chemotaxis regulator - transmits chemoreceptor signals to flagellar motor components CheY
Methylobacter sp. BBA5.1	1.49506e+06	JQKS01000056	fig|1495064.3.peg.4692	1106	2050	945	314	Flagellar motor rotation protein MotB
Methylobacter sp. BBA5.1	1.49506e+06	JQKS01000056	fig|1495064.3.peg.4693	2074	2928	855	284	Flagellar motor rotation protein MotA
Methylobacter sp. BBA5.1	1.49506e+06	JQKS01000059	fig|1495064.3.peg.4737	7734	8117	384	127	Flagellar biosynthesis protein FliS
Methylobacter sp. BBA5.1	1.49506e+06	JQKS01000059	fig|1495064.3.peg.4738	8157	10085	1929	642	Flagellar cap protein FliD
Methylocaldum sp. 175 strain 175	1.5281e+06	FXAM01000001	fig|1528100.4.peg.2162	1434170	1435564	1395	464	Chemotaxis regulator - transmits chemoreceptor signals to flagellar motor components CheY
Methylocaldum sp. 175 strain 175	1.5281e+06	FXAM01000001	fig|1528100.4.peg.2625	1954809	1956899	2091	696	Flagellar biosynthesis protein FlhA
Methylocaldum sp. 175 strain 175	1.5281e+06	FXAM01000001	fig|1528100.4.peg.2626	1956944	1958545	1602	533	Flagellar biosynthesis protein FlhF
Methylocaldum sp. 175 strain 175	1.5281e+06	FXAM01000001	fig|1528100.4.peg.2627	1958574	1959404	831	276	Flagellar synthesis regulator FleN
Methylocaldum sp. 175 strain 175	1.5281e+06	FXAM01000001	fig|1528100.4.peg.2628	1959401	1960180	780	259	RNA polymerase sigma factor for flagellar operon
Methylocaldum sp. 175 strain 175	1.5281e+06	FXAM01000001	fig|1528100.4.peg.2629	1960365	1960751	387	128	Chemotaxis regulator - transmits chemoreceptor signals to flagellar motor components CheY
Methylocaldum sp. 175 strain 175	1.5281e+06	FXAM01000001	fig|1528100.4.peg.2633	1964827	1965570	744	247	Flagellar motor rotation protein MotA
Methylocaldum sp. 175 strain 175	1.5281e+06	FXAM01000001	fig|1528100.4.peg.2634	1965574	1966422	849	282	Flagellar motor rotation protein MotB
Methylocaldum sp. 175 strain 175	1.5281e+06	FXAM01000001	fig|1528100.4.peg.2796	2131259	2131627	369	122	Chemotaxis regulator - transmits chemoreceptor signals to flagellar motor components CheY
Methylocaldum sp. 175 strain 175	1.5281e+06	FXAM01000001	fig|1528100.4.peg.3219	2591685	2593079	1395	464	Flagellar regulatory protein FleQ
Methylocaldum sp. 175 strain 175	1.5281e+06	FXAM01000001	fig|1528100.4.peg.3221	2593294	2593617	324	107	Flagellar hook-basal body complex protein FliE
Methylocaldum sp. 175 strain 175	1.5281e+06	FXAM01000001	fig|1528100.4.peg.3222	2593627	2595450	1824	607	Flagellar M-ring protein FliF
Methylocaldum sp. 175 strain 175	1.5281e+06	FXAM01000001	fig|1528100.4.peg.3224	2595677	2596687	1011	336	Flagellar motor switch protein FliG
Methylocaldum sp. 175 strain 175	1.5281e+06	FXAM01000001	fig|1528100.4.peg.3225	2596674	2597501	828	275	Flagellar assembly protein FliH
Methylocaldum sp. 175 strain 175	1.5281e+06	FXAM01000001	fig|1528100.4.peg.3528	2924690	2926732	2043	680	Flagellar cap protein FliD
Methylocaldum sp. 175 strain 175	1.5281e+06	FXAM01000001	fig|1528100.4.peg.3555	2956702	2957103	402	133	Flagellar basal-body rod protein FlgB
Methylocaldum sp. 175 strain 175	1.5281e+06	FXAM01000001	fig|1528100.4.peg.3556	2957106	2957543	438	145	Flagellar basal-body rod protein FlgC
Methylocaldum sp. 175 strain 175	1.5281e+06	FXAM01000001	fig|1528100.4.peg.3557	2957556	2958239	684	227	Flagellar basal-body rod modification protein FlgD
Methylocaldum sp. 175 strain 175	1.5281e+06	FXAM01000001	fig|1528100.4.peg.3558	2958264	2959532	1269	422	Flagellar hook protein FlgE
Methylocaldum sp. 175 strain 175	1.5281e+06	FXAM01000001	fig|1528100.4.peg.3559	2959573	2960313	741	246	Flagellar basal-body rod protein FlgF
Methylocaldum sp. 175 strain 175	1.5281e+06	FXAM01000001	fig|1528100.4.peg.3560	2960352	2961140	789	262	Flagellar basal-body rod protein FlgG
Methylocaldum sp. 175 strain 175	1.5281e+06	FXAM01000001	fig|1528100.4.peg.3561	2961152	2961844	693	230	Flagellar L-ring protein FlgH
Methylocaldum sp. 175 strain 175	1.5281e+06	FXAM01000001	fig|1528100.4.peg.3562	2961859	2962983	1125	374	Flagellar P-ring protein FlgI
Methylocaldum sp. 175 strain 175	1.5281e+06	FXAM01000001	fig|1528100.4.peg.3563	2962996	2963907	912	303	Flagellar protein FlgJ [peptidoglycan hydrolase]
Methylocaldum sp. 175 strain 175	1.5281e+06	FXAM01000001	fig|1528100.4.peg.3564	2964068	2965768	1701	566	Flagellar hook-associated protein FlgK
Methylocaldum sp. 175 strain 175	1.5281e+06	FXAM01000001	fig|1528100.4.peg.3565	2965773	2967068	1296	431	Flagellar hook-associated protein FlgL
Methylocaldum sp. 175 strain 175	1.5281e+06	FXAM01000001	fig|1528100.4.peg.4215	3616176	3624251	8076	2691	hypothetical protein formerly called flagellar hook-length control protein FliK
Methylocaldum sp. 175 strain 175	1.5281e+06	FXAM01000001	fig|1528100.4.peg.4295	3715762	3716616	855	284	Flagellar motor rotation protein MotA
Methylocaldum sp. 175 strain 175	1.5281e+06	FXAM01000001	fig|1528100.4.peg.4296	3716641	3717645	1005	334	Flagellar motor rotation protein MotB
Methylocaldum sp. 175 strain 175	1.5281e+06	FXAM01000001	fig|1528100.4.peg.4655	4064571	4064885	315	104	Uncharacterized homolog of the cytoplasmic domain of flagellar protein FhlB
Methylocaldum sp. 175 strain 175	1.5281e+06	FXAM01000001	fig|1528100.4.peg.4880	4277429	4278292	864	287	Flagellar motor rotation protein MotB
Methylocaldum sp. 175 strain 175	1.5281e+06	FXAM01000001	fig|1528100.4.peg.5068	4460248	4461012	765	254	Flagellar biosynthesis protein FliP
Methylocaldum sp. 175 strain 175	1.5281e+06	FXAM01000001	fig|1528100.4.peg.5070	4461425	4461892	468	155	Flagellar motor switch protein FliN
Methylocaldum sp. 175 strain 175	1.5281e+06	FXAM01000001	fig|1528100.4.peg.5071	4461932	4462939	1008	335	Flagellar motor switch protein FliM
Methylocaldum sp. 175 strain 175	1.5281e+06	FXAM01000001	fig|1528100.4.peg.5183	4573957	4574742	786	261	Chemotaxis regulator - transmits chemoreceptor signals to flagellar motor components CheY
Methylocaldum sp. 175 strain 175	1.5281e+06	FXAM01000001	fig|1528100.4.peg.1250	533806	534936	1131	376	Flagellar biosynthesis protein FlhB
Methylocaldum sp. 175 strain 175	1.5281e+06	FXAM01000001	fig|1528100.4.peg.1251	534940	535710	771	256	Flagellar biosynthesis protein FliR
Methylocaldum sp. 175 strain 175	1.5281e+06	FXAM01000001	fig|1528100.4.peg.1252	535714	535983	270	89	Flagellar biosynthesis protein FliQ
Methylocaldum sp. 175 strain 175	1.5281e+06	FXAM01000001	fig|1528100.4.peg.1682	949939	950301	363	120	Chemotaxis regulator - transmits chemoreceptor signals to flagellar motor components CheY
Methylocaldum sp. 175 strain 175	1.5281e+06	FXAM01000005	fig|1528100.4.peg.711	1484	1936	453	150	Chemotaxis regulator - transmits chemoreceptor signals to flagellar motor components CheY
Methylocaldum sp. 175 strain 175	1.5281e+06	FXAM01000005	fig|1528100.4.peg.756	38954	39325	372	123	Chemotaxis regulator - transmits chemoreceptor signals to flagellar motor components CheY
Methylocaldum sp. 175 strain 175	1.5281e+06	FXAM01000005	fig|1528100.4.peg.757	39322	39813	492	163	Chemotaxis regulator - transmits chemoreceptor signals to flagellar motor components CheY
Methylocaldum sp. 175 strain 175	1.5281e+06	FXAM01000005	fig|1528100.4.peg.760	42521	42895	375	124	Chemotaxis regulator - transmits chemoreceptor signals to flagellar motor components CheY
Methylocaldum sp. 175 strain 175	1.5281e+06	FXAM01000005	fig|1528100.4.peg.714	4682	5056	375	124	Chemotaxis regulator - transmits chemoreceptor signals to flagellar motor components CheY
Methylomonas denitrificans FJG1	1.53855e+06	JTDD01000008	fig|1538553.4.peg.577	76864	78279	1416	471	Flagellar regulatory protein FleQ
Methylomonas denitrificans FJG1	1.53855e+06	JTDD01000018	fig|1538553.4.peg.1268	25054	25848	795	264	Chemotaxis regulator - transmits chemoreceptor signals to flagellar motor components CheY
Methylomonas denitrificans FJG1	1.53855e+06	JTDD01000028	fig|1538553.4.peg.1660	58841	59233	393	130	Similar to flagellar basal body-associated protein FliL
Methylomonas denitrificans FJG1	1.53855e+06	JTDD01000029	fig|1538553.4.peg.1743	22455	22823	369	122	Chemotaxis regulator - transmits chemoreceptor signals to flagellar motor components CheY
Methylomonas denitrificans FJG1	1.53855e+06	JTDD01000032	fig|1538553.4.peg.1975	21253	22605	1353	450	Flagellar hook-length control protein FliK
Methylomonas denitrificans FJG1	1.53855e+06	JTDD01000032	fig|1538553.4.peg.1981	25120	26130	1011	336	Flagellar motor switch protein FliG
Methylomonas denitrificans FJG1	1.53855e+06	JTDD01000032	fig|1538553.4.peg.1982	26123	27874	1752	583	Flagellar M-ring protein FliF
Methylomonas denitrificans FJG1	1.53855e+06	JTDD01000032	fig|1538553.4.peg.1983	27893	28159	267	88	Flagellar hook-basal body complex protein FliE
Methylomonas denitrificans FJG1	1.53855e+06	JTDD01000032	fig|1538553.4.peg.1984	28261	29643	1383	460	Flagellar two-component response regulator FleR
Methylomonas denitrificans FJG1	1.53855e+06	JTDD01000032	fig|1538553.4.peg.1985	29630	30835	1206	401	Flagellar sensor histidine kinase FleS
Methylomonas denitrificans FJG1	1.53855e+06	JTDD01000035	fig|1538553.4.peg.2192	39755	40039	285	94	Uncharacterized homolog of the cytoplasmic domain of flagellar protein FhlB
Methylomonas denitrificans FJG1	1.53855e+06	JTDD01000038	fig|1538553.4.peg.2385	74770	75618	849	282	Flagellar motor rotation protein MotA
Methylomonas denitrificans FJG1	1.53855e+06	JTDD01000038	fig|1538553.4.peg.2386	75625	76422	798	265	Flagellar motor rotation protein MotB
Methylomonas denitrificans FJG1	1.53855e+06	JTDD01000043	fig|1538553.4.peg.2590	55604	57244	1641	546	Flagellar hook-associated protein FlgK
Methylomonas denitrificans FJG1	1.53855e+06	JTDD01000043	fig|1538553.4.peg.2591	57281	58330	1050	349	Flagellar protein FlgJ [peptidoglycan hydrolase]
Methylomonas denitrificans FJG1	1.53855e+06	JTDD01000043	fig|1538553.4.peg.2592	58376	59464	1089	362	Flagellar P-ring protein FlgI
Methylomonas denitrificans FJG1	1.53855e+06	JTDD01000043	fig|1538553.4.peg.2593	59477	60190	714	237	Flagellar L-ring protein FlgH
Methylomonas denitrificans FJG1	1.53855e+06	JTDD01000043	fig|1538553.4.peg.2594	60206	60994	789	262	Flagellar basal-body rod protein FlgG
Methylomonas denitrificans FJG1	1.53855e+06	JTDD01000043	fig|1538553.4.peg.2595	61046	61789	744	247	Flagellar basal-body rod protein FlgF
Methylomonas denitrificans FJG1	1.53855e+06	JTDD01000043	fig|1538553.4.peg.2596	61806	63137	1332	443	Flagellar hook protein FlgE
Methylomonas denitrificans FJG1	1.53855e+06	JTDD01000043	fig|1538553.4.peg.2597	63151	63831	681	226	Flagellar basal-body rod modification protein FlgD
Methylomonas denitrificans FJG1	1.53855e+06	JTDD01000043	fig|1538553.4.peg.2598	63839	64255	417	138	Flagellar basal-body rod protein FlgC
Methylomonas denitrificans FJG1	1.53855e+06	JTDD01000043	fig|1538553.4.peg.2599	64258	64653	396	131	Flagellar basal-body rod protein FlgB
Methylomonas denitrificans FJG1	1.53855e+06	JTDD01000043	fig|1538553.4.peg.2602	66786	67475	690	229	Flagellar basal-body P-ring formation protein FlgA
Methylomonas denitrificans FJG1	1.53855e+06	JTDD01000043	fig|1538553.4.peg.2605	68383	69162	780	259	Flagellar brake protein YcgR
Methylomonas denitrificans FJG1	1.53855e+06	JTDD01000045	fig|1538553.4.peg.2706	46002	46460	459	152	Flagellar assembly factor FliW
Methylomonas denitrificans FJG1	1.53855e+06	JTDD01000055	fig|1538553.4.peg.3206	73200	74357	1158	385	Flagellar protein FlgT
Methylomonas denitrificans FJG1	1.53855e+06	JTDD01000071	fig|1538553.4.peg.3665	27388	27678	291	96	Flagellar biosynthesis protein FliS
Methylomonas denitrificans FJG1	1.53855e+06	JTDD01000071	fig|1538553.4.peg.3666	27789	29186	1398	465	Flagellar cap protein FliD
Methylomonas denitrificans FJG1	1.53855e+06	JTDD01000071	fig|1538553.4.peg.3667	29213	29500	288	95	Flagellar protein FlaG
Methylomonas denitrificans FJG1	1.53855e+06	JTDD01000079	fig|1538553.4.peg.3809	10326	11018	693	230	Flagellar synthesis regulator FleN
Methylomonas denitrificans FJG1	1.53855e+06	JTDD01000079	fig|1538553.4.peg.3810	11190	12152	963	320	Flagellar biosynthesis protein FlhF
Methylomonas denitrificans FJG1	1.53855e+06	JTDD01000079	fig|1538553.4.peg.3811	12149	12595	447	148	Flagellar biosynthesis protein FlhF
Methylomonas denitrificans FJG1	1.53855e+06	JTDD01000079	fig|1538553.4.peg.3812	12611	14716	2106	701	Flagellar biosynthesis protein FlhA
Methylomonas denitrificans FJG1	1.53855e+06	JTDD01000079	fig|1538553.4.peg.3813	14735	15862	1128	375	Flagellar biosynthesis protein FlhB
Methylomonas denitrificans FJG1	1.53855e+06	JTDD01000079	fig|1538553.4.peg.3814	15863	16639	777	258	Flagellar biosynthesis protein FliR
Methylomonas denitrificans FJG1	1.53855e+06	JTDD01000079	fig|1538553.4.peg.3815	16636	16905	270	89	Flagellar biosynthesis protein FliQ
Methylomonas denitrificans FJG1	1.53855e+06	JTDD01000079	fig|1538553.4.peg.3816	16918	17664	747	248	Flagellar biosynthesis protein FliP
Methylomonas denitrificans FJG1	1.53855e+06	JTDD01000079	fig|1538553.4.peg.3817	17657	17962	306	101	Flagellar biosynthesis protein FliO
Methylomonas denitrificans FJG1	1.53855e+06	JTDD01000079	fig|1538553.4.peg.3818	18100	18558	459	152	Flagellar motor switch protein FliN
Methylomonas denitrificans FJG1	1.53855e+06	JTDD01000079	fig|1538553.4.peg.3819	18577	19557	981	326	Flagellar motor switch protein FliM
Methylomonas denitrificans FJG1	1.53855e+06	JTDD01000079	fig|1538553.4.peg.3820	19558	20058	501	166	Flagellar basal body-associated protein FliL
Methylomonas denitrificans FJG1	1.53855e+06	JTDD01000079	fig|1538553.4.peg.3802	3400	4257	858	285	Flagellar motor rotation protein MotB
Methylomonas denitrificans FJG1	1.53855e+06	JTDD01000079	fig|1538553.4.peg.3803	4292	5038	747	248	Flagellar motor rotation protein MotA
Methylomonas denitrificans FJG1	1.53855e+06	JTDD01000079	fig|1538553.4.peg.3807	9109	9495	387	128	Chemotaxis regulator - transmits chemoreceptor signals to flagellar motor components CheY
Methylomonas denitrificans FJG1	1.53855e+06	JTDD01000079	fig|1538553.4.peg.3808	9583	10329	747	248	RNA polymerase sigma factor for flagellar operon	GO:0003677|DNA binding;GO:0003700|transcription factor activity;GO:0006352|transcription initiation;GO:0016987|sigma factor activity
Methylomonas denitrificans FJG1	1.53855e+06	JTDD01000080	fig|1538553.4.peg.3835	12320	13744	1425	474	Flagellar synthesis regulator FleN / Domain of unknown function
Methylomonas denitrificans FJG1	1.53855e+06	JTDD01000082	fig|1538553.4.peg.3890	33848	34216	369	122	Chemotaxis regulator - transmits chemoreceptor signals to flagellar motor components CheY
Methylomonas denitrificans FJG1	1.53855e+06	JTDD01000083	fig|1538553.4.peg.3934	40472	40789	318	105	Chemotaxis regulator - transmits chemoreceptor signals to flagellar motor components CheY
Methylomonas denitrificans FJG1	1.53855e+06	JTDD01000083	fig|1538553.4.peg.3902	9302	9565	264	87	Chemotaxis regulator - transmits chemoreceptor signals to flagellar motor components CheY
Methylomonas denitrificans FJG1	1.53855e+06	JTDD01000083	fig|1538553.4.peg.3903	9559	10107	549	182	Chemotaxis regulator - transmits chemoreceptor signals to flagellar motor components CheY
Methylomonas sp. Kb3	1.61154e+06	PIZT01000001	fig|1611544.3.peg.39	33262	34056	795	264	Chemotaxis regulator - transmits chemoreceptor signals to flagellar motor components CheY
Methylomonas sp. Kb3	1.61154e+06	PIZT01000001	fig|1611544.3.peg.5	5107	5475	369	122	Chemotaxis regulator - transmits chemoreceptor signals to flagellar motor components CheY
Methylomonas sp. Kb3	1.61154e+06	PIZT01000002	fig|1611544.3.peg.4638	102031	103392	1362	453	Flagellar hook-length control protein FliK
Methylomonas sp. Kb3	1.61154e+06	PIZT01000002	fig|1611544.3.peg.4745	206734	207096	363	120	Chemotaxis regulator - transmits chemoreceptor signals to flagellar motor components CheY
Methylomonas sp. Kb3	1.61154e+06	PIZT01000002	fig|1611544.3.peg.4776	237596	238402	807	268	Chemotaxis regulator - transmits chemoreceptor signals to flagellar motor components CheY
Methylomonas sp. Kb3	1.61154e+06	PIZT01000002	fig|1611544.3.peg.4630	93801	95006	1206	401	Flagellar sensor histidine kinase FleS
Methylomonas sp. Kb3	1.61154e+06	PIZT01000002	fig|1611544.3.peg.4631	94993	96375	1383	460	Flagellar two-component response regulator FleR
Methylomonas sp. Kb3	1.61154e+06	PIZT01000002	fig|1611544.3.peg.4632	96431	96742	312	103	Flagellar hook-basal body complex protein FliE
Methylomonas sp. Kb3	1.61154e+06	PIZT01000002	fig|1611544.3.peg.4633	96760	98511	1752	583	Flagellar M-ring protein FliF
Methylomonas sp. Kb3	1.61154e+06	PIZT01000002	fig|1611544.3.peg.4634	98504	99514	1011	336	Flagellar motor switch protein FliG
Methylomonas sp. Kb3	1.61154e+06	PIZT01000004	fig|1611544.3.peg.447	84205	84591	387	128	Flagellar biosynthesis protein FliS
Methylomonas sp. Kb3	1.61154e+06	PIZT01000004	fig|1611544.3.peg.448	84607	86004	1398	465	Flagellar cap protein FliD
Methylomonas sp. Kb3	1.61154e+06	PIZT01000004	fig|1611544.3.peg.449	86031	86468	438	145	Flagellar protein FlaG
Methylomonas sp. Kb3	1.61154e+06	PIZT01000005	fig|1611544.3.peg.633	110561	111742	1182	393	Flagellar protein FlgT
Methylomonas sp. Kb3	1.61154e+06	PIZT01000006	fig|1611544.3.peg.4461	164249	164710	462	153	Similar to flagellar basal body-associated protein FliL
Methylomonas sp. Kb3	1.61154e+06	PIZT01000006	fig|1611544.3.peg.4373	81568	81936	369	122	Chemotaxis regulator - transmits chemoreceptor signals to flagellar motor components CheY
Methylomonas sp. Kb3	1.61154e+06	PIZT01000008	fig|1611544.3.peg.955	80633	82048	1416	471	Flagellar regulatory protein FleQ
Methylomonas sp. Kb3	1.61154e+06	PIZT01000012	fig|1611544.3.peg.1155	13251	14159	909	302	Flagellar hook-associated protein FlgL
Methylomonas sp. Kb3	1.61154e+06	PIZT01000012	fig|1611544.3.peg.1156	14169	15836	1668	555	Flagellar hook-associated protein FlgK
Methylomonas sp. Kb3	1.61154e+06	PIZT01000012	fig|1611544.3.peg.1157	15846	16892	1047	348	Flagellar protein FlgJ [peptidoglycan hydrolase]
Methylomonas sp. Kb3	1.61154e+06	PIZT01000012	fig|1611544.3.peg.1158	16938	18026	1089	362	Flagellar P-ring protein FlgI
Methylomonas sp. Kb3	1.61154e+06	PIZT01000012	fig|1611544.3.peg.1159	18049	18753	705	234	Flagellar L-ring protein FlgH
Methylomonas sp. Kb3	1.61154e+06	PIZT01000012	fig|1611544.3.peg.1160	18769	19557	789	262	Flagellar basal-body rod protein FlgG
Methylomonas sp. Kb3	1.61154e+06	PIZT01000012	fig|1611544.3.peg.1161	19609	20352	744	247	Flagellar basal-body rod protein FlgF
Methylomonas sp. Kb3	1.61154e+06	PIZT01000012	fig|1611544.3.peg.1162	20369	21700	1332	443	Flagellar hook protein FlgE
Methylomonas sp. Kb3	1.61154e+06	PIZT01000012	fig|1611544.3.peg.1163	21714	22394	681	226	Flagellar basal-body rod modification protein FlgD
Methylomonas sp. Kb3	1.61154e+06	PIZT01000012	fig|1611544.3.peg.1164	22402	22818	417	138	Flagellar basal-body rod protein FlgC
Methylomonas sp. Kb3	1.61154e+06	PIZT01000012	fig|1611544.3.peg.1165	22821	23216	396	131	Flagellar basal-body rod protein FlgB
Methylomonas sp. Kb3	1.61154e+06	PIZT01000012	fig|1611544.3.peg.1168	25350	26039	690	229	Flagellar basal-body P-ring formation protein FlgA
Methylomonas sp. Kb3	1.61154e+06	PIZT01000012	fig|1611544.3.peg.1171	26947	27726	780	259	Flagellar brake protein YcgR
Methylomonas sp. Kb3	1.61154e+06	PIZT01000015	fig|1611544.3.peg.3791	80486	80944	459	152	Flagellar assembly factor FliW
Methylomonas sp. Kb3	1.61154e+06	PIZT01000024	fig|1611544.3.peg.1859	39027	39908	882	293	Flagellar motor rotation protein MotB
Methylomonas sp. Kb3	1.61154e+06	PIZT01000024	fig|1611544.3.peg.1860	39919	40665	747	248	Flagellar motor rotation protein MotA
Methylomonas sp. Kb3	1.61154e+06	PIZT01000024	fig|1611544.3.peg.1864	44730	45104	375	124	Chemotaxis regulator - transmits chemoreceptor signals to flagellar motor components CheY
Methylomonas sp. Kb3	1.61154e+06	PIZT01000024	fig|1611544.3.peg.1865	45204	45950	747	248	RNA polymerase sigma factor for flagellar operon
Methylomonas sp. Kb3	1.61154e+06	PIZT01000024	fig|1611544.3.peg.1866	45947	46780	834	277	Flagellar synthesis regulator FleN
Methylomonas sp. Kb3	1.61154e+06	PIZT01000024	fig|1611544.3.peg.1867	46812	48227	1416	471	Flagellar biosynthesis protein FlhF
Methylomonas sp. Kb3	1.61154e+06	PIZT01000024	fig|1611544.3.peg.1868	48243	50348	2106	701	Flagellar biosynthesis protein FlhA
Methylomonas sp. Kb3	1.61154e+06	PIZT01000024	fig|1611544.3.peg.1869	50368	51495	1128	375	Flagellar biosynthesis protein FlhB
Methylomonas sp. Kb3	1.61154e+06	PIZT01000024	fig|1611544.3.peg.1870	51496	52272	777	258	Flagellar biosynthesis protein FliR
Methylomonas sp. Kb3	1.61154e+06	PIZT01000024	fig|1611544.3.peg.1871	52269	52541	273	90	Flagellar biosynthesis protein FliQ
Methylomonas sp. Kb3	1.61154e+06	PIZT01000024	fig|1611544.3.peg.1872	52551	53297	747	248	Flagellar biosynthesis protein FliP
Methylomonas sp. Kb3	1.61154e+06	PIZT01000024	fig|1611544.3.peg.1873	53290	53733	444	147	Flagellar biosynthesis protein FliO
Methylomonas sp. Kb3	1.61154e+06	PIZT01000024	fig|1611544.3.peg.1874	53733	54185	453	150	Flagellar motor switch protein FliN
Methylomonas sp. Kb3	1.61154e+06	PIZT01000024	fig|1611544.3.peg.1875	54204	55184	981	326	Flagellar motor switch protein FliM
Methylomonas sp. Kb3	1.61154e+06	PIZT01000024	fig|1611544.3.peg.1876	55185	55733	549	182	Flagellar basal body-associated protein FliL
Methylomonas sp. Kb3	1.61154e+06	PIZT01000065	fig|1611544.3.peg.5072	296312	297157	846	281	Flagellar motor rotation protein MotA
Methylomonas sp. Kb3	1.61154e+06	PIZT01000065	fig|1611544.3.peg.5073	297169	298140	972	323	Flagellar motor rotation protein MotB
Methylomonas sp. Kb3	1.61154e+06	PIZT01000068	fig|1611544.3.peg.2620	394319	394603	285	94	Uncharacterized homolog of the cytoplasmic domain of flagellar protein FhlB
Methylomonas sp. DH-1	1.7272e+06	CP014360	fig|1727196.4.peg.1515	1492867	1493151	285	94	Uncharacterized homolog of the cytoplasmic domain of flagellar protein FhlB
Methylomonas sp. DH-1	1.7272e+06	CP014360	fig|1727196.4.peg.2084	2066601	2066963	363	120	Chemotaxis regulator - transmits chemoreceptor signals to flagellar motor components CheY
Methylomonas sp. DH-1	1.7272e+06	CP014360	fig|1727196.4.peg.2119	2103701	2104507	807	268	Chemotaxis regulator - transmits chemoreceptor signals to flagellar motor components CheY
Methylomonas sp. DH-1	1.7272e+06	CP014360	fig|1727196.4.peg.2125	2109157	2109525	369	122	Chemotaxis regulator - transmits chemoreceptor signals to flagellar motor components CheY
Methylomonas sp. DH-1	1.7272e+06	CP014360	fig|1727196.4.peg.225	224998	225957	960	319	Flagellar motor rotation protein MotB
Methylomonas sp. DH-1	1.7272e+06	CP014360	fig|1727196.4.peg.226	225971	226816	846	281	Flagellar motor rotation protein MotA
Methylomonas sp. DH-1	1.7272e+06	CP014360	fig|1727196.4.peg.2366	2419113	2420525	1413	470	Flagellar regulatory protein FleQ
Methylomonas sp. DH-1	1.7272e+06	CP014360	fig|1727196.4.peg.2617	2691102	2691509	408	135	Similar to flagellar basal body-associated protein FliL
Methylomonas sp. DH-1	1.7272e+06	CP014360	fig|1727196.4.peg.2894	2962395	2963102	708	235	Flagellar assembly protein FliH
Methylomonas sp. DH-1	1.7272e+06	CP014360	fig|1727196.4.peg.2895	2963089	2964096	1008	335	Flagellar motor switch protein FliG
Methylomonas sp. DH-1	1.7272e+06	CP014360	fig|1727196.4.peg.2896	2964089	2965831	1743	580	Flagellar M-ring protein FliF
Methylomonas sp. DH-1	1.7272e+06	CP014360	fig|1727196.4.peg.2897	2965850	2966161	312	103	Flagellar hook-basal body complex protein FliE
Methylomonas sp. DH-1	1.7272e+06	CP014360	fig|1727196.4.peg.2898	2966219	2967601	1383	460	Flagellar two-component response regulator FleR
Methylomonas sp. DH-1	1.7272e+06	CP014360	fig|1727196.4.peg.2899	2967588	2968790	1203	400	Flagellar sensor histidine kinase FleS
Methylomonas sp. DH-1	1.7272e+06	CP014360	fig|1727196.4.peg.3136	3224722	3225906	1185	394	Flagellar protein FlgT
Methylomonas sp. DH-1	1.7272e+06	CP014360	fig|1727196.4.peg.3830	3923666	3924055	390	129	Flagellar biosynthesis protein FliS
Methylomonas sp. DH-1	1.7272e+06	CP014360	fig|1727196.4.peg.3831	3924068	3925471	1404	467	Flagellar cap protein FliD
Methylomonas sp. DH-1	1.7272e+06	CP014360	fig|1727196.4.peg.3832	3925491	3925934	444	147	Flagellar protein FlaG
Methylomonas sp. DH-1	1.7272e+06	CP014360	fig|1727196.4.peg.3971	4079330	4080109	780	259	Flagellar brake protein YcgR
Methylomonas sp. DH-1	1.7272e+06	CP014360	fig|1727196.4.peg.3977	4083831	4084226	396	131	Flagellar basal-body rod protein FlgB
Methylomonas sp. DH-1	1.7272e+06	CP014360	fig|1727196.4.peg.3978	4084229	4084645	417	138	Flagellar basal-body rod protein FlgC
Methylomonas sp. DH-1	1.7272e+06	CP014360	fig|1727196.4.peg.3979	4084654	4085334	681	226	Flagellar basal-body rod modification protein FlgD
Methylomonas sp. DH-1	1.7272e+06	CP014360	fig|1727196.4.peg.3980	4085346	4086671	1326	441	Flagellar hook protein FlgE
Methylomonas sp. DH-1	1.7272e+06	CP014360	fig|1727196.4.peg.3981	4086688	4087431	744	247	Flagellar basal-body rod protein FlgF
Methylomonas sp. DH-1	1.7272e+06	CP014360	fig|1727196.4.peg.3982	4087483	4088271	789	262	Flagellar basal-body rod protein FlgG
Methylomonas sp. DH-1	1.7272e+06	CP014360	fig|1727196.4.peg.3983	4088287	4089000	714	237	Flagellar L-ring protein FlgH
Methylomonas sp. DH-1	1.7272e+06	CP014360	fig|1727196.4.peg.3984	4089024	4090109	1086	361	Flagellar P-ring protein FlgI
Methylomonas sp. DH-1	1.7272e+06	CP014360	fig|1727196.4.peg.3985	4090154	4091206	1053	350	Flagellar protein FlgJ [peptidoglycan hydrolase]
Methylomonas sp. DH-1	1.7272e+06	CP014360	fig|1727196.4.peg.3986	4091216	4092895	1680	559	Flagellar hook-associated protein FlgK
Methylomonas sp. DH-1	1.7272e+06	CP014360	fig|1727196.4.peg.4163	4278804	4279598	795	264	Chemotaxis regulator - transmits chemoreceptor signals to flagellar motor components CheY
Methylomonas sp. DH-1	1.7272e+06	CP014360	fig|1727196.4.peg.4434	4574181	4574549	369	122	Chemotaxis regulator - transmits chemoreceptor signals to flagellar motor components CheY
Methylomonas sp. DH-1	1.7272e+06	CP014360	fig|1727196.4.peg.4492	4629461	4629919	459	152	Flagellar assembly factor FliW
Methylomonas sp. DH-1	1.7272e+06	CP014360	fig|1727196.4.peg.550	562153	562692	540	179	Flagellar basal body-associated protein FliL
Methylomonas sp. DH-1	1.7272e+06	CP014360	fig|1727196.4.peg.551	562693	563676	984	327	Flagellar motor switch protein FliM
Methylomonas sp. DH-1	1.7272e+06	CP014360	fig|1727196.4.peg.552	563696	564142	447	148	Flagellar motor switch protein FliN
Methylomonas sp. DH-1	1.7272e+06	CP014360	fig|1727196.4.peg.554	564629	565333	705	234	Flagellar biosynthesis protein FliP
Methylomonas sp. DH-1	1.7272e+06	CP014360	fig|1727196.4.peg.555	565342	565611	270	89	Flagellar biosynthesis protein FliQ
Methylomonas sp. DH-1	1.7272e+06	CP014360	fig|1727196.4.peg.556	565608	566384	777	258	Flagellar biosynthesis protein FliR
Methylomonas sp. DH-1	1.7272e+06	CP014360	fig|1727196.4.peg.557	566385	567512	1128	375	Flagellar biosynthesis protein FlhB
Methylomonas sp. DH-1	1.7272e+06	CP014360	fig|1727196.4.peg.558	567531	569627	2097	698	Flagellar biosynthesis protein FlhA
Methylomonas sp. DH-1	1.7272e+06	CP014360	fig|1727196.4.peg.559	569646	571061	1416	471	Flagellar biosynthesis protein FlhF
Methylomonas sp. DH-1	1.7272e+06	CP014360	fig|1727196.4.peg.560	571093	571926	834	277	Flagellar synthesis regulator FleN
Methylomonas sp. DH-1	1.7272e+06	CP014360	fig|1727196.4.peg.561	571923	572669	747	248	RNA polymerase sigma factor for flagellar operon
Methylomonas sp. DH-1	1.7272e+06	CP014360	fig|1727196.4.peg.563	572770	573144	375	124	Chemotaxis regulator - transmits chemoreceptor signals to flagellar motor components CheY
Methylomonas sp. DH-1	1.7272e+06	CP014360	fig|1727196.4.peg.567	577243	577989	747	248	Flagellar motor rotation protein MotA
Methylomonas sp. DH-1	1.7272e+06	CP014360	fig|1727196.4.peg.568	578000	578884	885	294	Flagellar motor rotation protein MotB
Methylobacter tundripaludum Tobar13m-G39	173365	JAIPFK010000004	fig|173365.10.peg.104	109337	109792	456	151	Similar to flagellar basal body-associated protein FliL
Methylobacter tundripaludum Tobar13m-G39	173365	JAIPFK010000005	fig|173365.10.peg.261	5250	6098	849	282	Flagellar motor rotation protein MotA
Methylobacter tundripaludum Tobar13m-G39	173365	JAIPFK010000005	fig|173365.10.peg.262	6102	7061	960	319	Flagellar motor rotation protein MotB
Methylobacter tundripaludum Tobar13m-G39	173365	JAIPFK010000007	fig|173365.10.peg.675	102970	103425	456	151	Flagellar assembly factor FliW
Methylobacter tundripaludum Tobar13m-G39	173365	JAIPFK010000007	fig|173365.10.peg.677	104886	105536	651	216	Flagellar protein FlgP
Methylobacter tundripaludum Tobar13m-G39	173365	JAIPFK010000012	fig|173365.10.peg.1279	10583	11041	459	152	Flagellar biosynthesis protein FliO
Methylobacter tundripaludum Tobar13m-G39	173365	JAIPFK010000012	fig|173365.10.peg.1280	11041	11421	381	126	Flagellar motor switch protein FliN
Methylobacter tundripaludum Tobar13m-G39	173365	JAIPFK010000012	fig|173365.10.peg.1281	11477	12472	996	331	Flagellar motor switch protein FliM
Methylobacter tundripaludum Tobar13m-G39	173365	JAIPFK010000012	fig|173365.10.peg.1282	12476	12973	498	165	Flagellar biosynthesis protein FliL
Methylobacter tundripaludum Tobar13m-G39	173365	JAIPFK010000012	fig|173365.10.peg.1270	1552	2307	756	251	Flagellar motor rotation protein MotA
Methylobacter tundripaludum Tobar13m-G39	173365	JAIPFK010000012	fig|173365.10.peg.1271	2339	3067	729	242	RNA polymerase sigma factor for flagellar operon
Methylobacter tundripaludum Tobar13m-G39	173365	JAIPFK010000012	fig|173365.10.peg.1272	3064	3897	834	277	Flagellar synthesis regulator FleN
Methylobacter tundripaludum Tobar13m-G39	173365	JAIPFK010000012	fig|173365.10.peg.1273	3929	5494	1566	521	Flagellar biosynthesis protein FlhF
Methylobacter tundripaludum Tobar13m-G39	173365	JAIPFK010000012	fig|173365.10.peg.1274	5511	7610	2100	699	Flagellar biosynthesis protein FlhA
Methylobacter tundripaludum Tobar13m-G39	173365	JAIPFK010000012	fig|173365.10.peg.1319	57452	57841	390	129	Chemotaxis regulator - transmits chemoreceptor signals to flagellar motor components CheY
Methylobacter tundripaludum Tobar13m-G39	173365	JAIPFK010000012	fig|173365.10.peg.1269	697	1548	852	283	Flagellar motor rotation protein MotB
Methylobacter tundripaludum Tobar13m-G39	173365	JAIPFK010000012	fig|173365.10.peg.1275	7617	8747	1131	376	Flagellar biosynthesis protein FlhB
Methylobacter tundripaludum Tobar13m-G39	173365	JAIPFK010000012	fig|173365.10.peg.1276	8751	9524	774	257	Flagellar biosynthesis protein FliR
Methylobacter tundripaludum Tobar13m-G39	173365	JAIPFK010000012	fig|173365.10.peg.1277	9528	9797	270	89	Flagellar biosynthesis protein FliQ
Methylobacter tundripaludum Tobar13m-G39	173365	JAIPFK010000012	fig|173365.10.peg.1278	9832	10590	759	252	Flagellar biosynthesis protein FliP
Methylobacter tundripaludum Tobar13m-G39	173365	JAIPFK010000015	fig|173365.10.peg.1649	38766	39050	285	94	Uncharacterized homolog of the cytoplasmic domain of flagellar protein FhlB
Methylobacter tundripaludum Tobar13m-G39	173365	JAIPFK010000015	fig|173365.10.peg.1625	5132	5500	369	122	Chemotaxis regulator - transmits chemoreceptor signals to flagellar motor components CheY
Methylobacter tundripaludum Tobar13m-G39	173365	JAIPFK010000016	fig|173365.10.peg.1762	37643	38005	363	120	Chemotaxis regulator - transmits chemoreceptor signals to flagellar motor components CheY
Methylobacter tundripaludum Tobar13m-G39	173365	JAIPFK010000022	fig|173365.10.peg.2434	55427	56311	885	294	Flagellar motor rotation protein MotB
Methylobacter tundripaludum Tobar13m-G39	173365	JAIPFK010000022	fig|173365.10.peg.2435	56336	57148	813	270	Flagellar motor rotation protein MotA
Methylobacter tundripaludum Tobar13m-G39	173365	JAIPFK010000025	fig|173365.10.peg.2633	30185	30880	696	231	Flagellar basal-body P-ring formation protein FlgA
Methylobacter tundripaludum Tobar13m-G39	173365	JAIPFK010000025	fig|173365.10.peg.2635	31176	31568	393	130	Flagellar basal-body rod protein FlgB
Methylobacter tundripaludum Tobar13m-G39	173365	JAIPFK010000025	fig|173365.10.peg.2636	31571	31984	414	137	Flagellar basal-body rod protein FlgC
Methylobacter tundripaludum Tobar13m-G39	173365	JAIPFK010000025	fig|173365.10.peg.2637	31995	32675	681	226	Flagellar basal-body rod modification protein FlgD
Methylobacter tundripaludum Tobar13m-G39	173365	JAIPFK010000025	fig|173365.10.peg.2638	32691	34493	1803	600	Flagellar hook protein FlgE
Methylobacter tundripaludum Tobar13m-G39	173365	JAIPFK010000025	fig|173365.10.peg.2639	34576	35325	750	249	Flagellar basal-body rod protein FlgF
Methylobacter tundripaludum Tobar13m-G39	173365	JAIPFK010000025	fig|173365.10.peg.2640	35475	36263	789	262	Flagellar basal-body rod protein FlgG
Methylobacter tundripaludum Tobar13m-G39	173365	JAIPFK010000025	fig|173365.10.peg.2641	36280	36966	687	228	Flagellar L-ring protein FlgH
Methylobacter tundripaludum Tobar13m-G39	173365	JAIPFK010000025	fig|173365.10.peg.2642	36982	38082	1101	366	Flagellar P-ring protein FlgI
Methylobacter tundripaludum Tobar13m-G39	173365	JAIPFK010000025	fig|173365.10.peg.2643	38139	39194	1056	351	Flagellar protein FlgJ [peptidoglycan hydrolase]
Methylobacter tundripaludum Tobar13m-G39	173365	JAIPFK010000025	fig|173365.10.peg.2644	39238	41730	2493	830	Flagellar hook-associated protein FlgK
Methylobacter tundripaludum Tobar13m-G39	173365	JAIPFK010000025	fig|173365.10.peg.2645	41742	43172	1431	476	Flagellar hook-associated protein FlgL
Methylobacter tundripaludum Tobar13m-G39	173365	JAIPFK010000025	fig|173365.10.peg.2604	801	1193	393	130	Flagellar biosynthesis protein FliS
Methylobacter tundripaludum Tobar13m-G39	173365	JAIPFK010000031	fig|173365.10.peg.3320	42791	44443	1653	550	Flagellar hook-length control protein FliK
Methylobacter tundripaludum Tobar13m-G39	173365	JAIPFK010000031	fig|173365.10.peg.3321	44476	44934	459	152	Flagellar protein FliJ
Methylobacter tundripaludum Tobar13m-G39	173365	JAIPFK010000031	fig|173365.10.peg.3323	46319	47140	822	273	Flagellar assembly protein FliH
Methylobacter tundripaludum Tobar13m-G39	173365	JAIPFK010000031	fig|173365.10.peg.3324	47127	48143	1017	338	Flagellar motor switch protein FliG
Methylobacter tundripaludum Tobar13m-G39	173365	JAIPFK010000031	fig|173365.10.peg.3325	48136	49962	1827	608	Flagellar M-ring protein FliF
Methylobacter tundripaludum Tobar13m-G39	173365	JAIPFK010000031	fig|173365.10.peg.3326	49988	50302	315	104	Flagellar hook-basal body complex protein FliE
Methylobacter tundripaludum Tobar13m-G39	173365	JAIPFK010000031	fig|173365.10.peg.3327	50363	51742	1380	459	Flagellar two-component response regulator FleR
Methylobacter tundripaludum Tobar13m-G39	173365	JAIPFK010000031	fig|173365.10.peg.3328	51729	53030	1302	433	Flagellar sensor histidine kinase FleS
Methylobacter tundripaludum Tobar13m-G39	173365	JAIPFK010000031	fig|173365.10.peg.3329	53174	54673	1500	499	Flagellar regulatory protein FleQ
Methylobacter tundripaludum Tobar13m-G39	173365	JAIPFK010000042	fig|173365.10.peg.1043	1362	3368	2007	668	Flagellar cap protein FliD
Methylobacter tundripaludum Tobar13m-G39	173365	JAIPFK010000045	fig|173365.10.peg.1956	14822	15190	369	122	Chemotaxis regulator - transmits chemoreceptor signals to flagellar motor components CheY
Methylobacter tundripaludum SO_2017_LW4 bin 69	173365	JALOCG010000003	fig|173365.13.peg.1999	4819	5181	363	120	Chemotaxis regulator - transmits chemoreceptor signals to flagellar motor components CheY
Methylobacter tundripaludum SO_2017_LW4 bin 69	173365	JALOCG010000003	fig|173365.13.peg.2065	81585	82433	849	282	Flagellar motor rotation protein MotA
Methylobacter tundripaludum SO_2017_LW4 bin 69	173365	JALOCG010000003	fig|173365.13.peg.2066	82437	83396	960	319	Flagellar motor rotation protein MotB
Methylobacter tundripaludum SO_2017_LW4 bin 69	173365	JALOCG010000004	fig|173365.13.peg.2565	142094	142462	369	122	Chemotaxis regulator - transmits chemoreceptor signals to flagellar motor components CheY
Methylobacter tundripaludum SO_2017_LW4 bin 69	173365	JALOCG010000010	fig|173365.13.peg.3541	17731	18120	390	129	Chemotaxis regulator - transmits chemoreceptor signals to flagellar motor components CheY
Methylobacter tundripaludum SO_2017_LW4 bin 69	173365	JALOCG010000010	fig|173365.13.peg.3591	69113	69610	498	165	Flagellar biosynthesis protein FliL
Methylobacter tundripaludum SO_2017_LW4 bin 69	173365	JALOCG010000010	fig|173365.13.peg.3592	69614	70609	996	331	Flagellar motor switch protein FliM
Methylobacter tundripaludum SO_2017_LW4 bin 69	173365	JALOCG010000010	fig|173365.13.peg.3593	70665	71045	381	126	Flagellar motor switch protein FliN
Methylobacter tundripaludum SO_2017_LW4 bin 69	173365	JALOCG010000010	fig|173365.13.peg.3594	71045	71503	459	152	Flagellar biosynthesis protein FliO
Methylobacter tundripaludum SO_2017_LW4 bin 69	173365	JALOCG010000010	fig|173365.13.peg.3595	71496	72254	759	252	Flagellar biosynthesis protein FliP
Methylobacter tundripaludum SO_2017_LW4 bin 69	173365	JALOCG010000010	fig|173365.13.peg.3596	72289	72558	270	89	Flagellar biosynthesis protein FliQ
Methylobacter tundripaludum SO_2017_LW4 bin 69	173365	JALOCG010000010	fig|173365.13.peg.3597	72562	73335	774	257	Flagellar biosynthesis protein FliR
Methylobacter tundripaludum SO_2017_LW4 bin 69	173365	JALOCG010000010	fig|173365.13.peg.3598	73339	74469	1131	376	Flagellar biosynthesis protein FlhB
Methylobacter tundripaludum SO_2017_LW4 bin 69	173365	JALOCG010000010	fig|173365.13.peg.3599	74476	76575	2100	699	Flagellar biosynthesis protein FlhA
Methylobacter tundripaludum SO_2017_LW4 bin 69	173365	JALOCG010000010	fig|173365.13.peg.3600	76592	78157	1566	521	Flagellar biosynthesis protein FlhF
Methylobacter tundripaludum SO_2017_LW4 bin 69	173365	JALOCG010000010	fig|173365.13.peg.3601	78189	79022	834	277	Flagellar synthesis regulator FleN
Methylobacter tundripaludum SO_2017_LW4 bin 69	173365	JALOCG010000010	fig|173365.13.peg.3602	79019	79747	729	242	RNA polymerase sigma factor for flagellar operon
Methylobacter tundripaludum SO_2017_LW4 bin 69	173365	JALOCG010000010	fig|173365.13.peg.3603	79779	80534	756	251	Flagellar motor rotation protein MotA
Methylobacter tundripaludum SO_2017_LW4 bin 69	173365	JALOCG010000010	fig|173365.13.peg.3604	80538	81389	852	283	Flagellar motor rotation protein MotB
Methylobacter tundripaludum SO_2017_LW4 bin 69	173365	JALOCG010000018	fig|173365.13.peg.341	2341	4347	2007	668	Flagellar cap protein FliD
Methylobacter tundripaludum SO_2017_LW4 bin 69	173365	JALOCG010000027	fig|173365.13.peg.873	28872	29240	369	122	Chemotaxis regulator - transmits chemoreceptor signals to flagellar motor components CheY
Methylobacter tundripaludum SO_2017_LW4 bin 69	173365	JALOCG010000032	fig|173365.13.peg.1157	7641	7973	333	110	Uncharacterized homolog of the cytoplasmic domain of flagellar protein FhlB
Methylobacter tundripaludum SO_2017_LW4 bin 69	173365	JALOCG010000036	fig|173365.13.peg.1521	14598	15053	456	151	Similar to flagellar basal body-associated protein FliL
Methylobacter tundripaludum SO_2017_LW4 bin 69	173365	JALOCG010000040	fig|173365.13.peg.1669	22813	23508	696	231	Flagellar basal-body P-ring formation protein FlgA
Methylobacter tundripaludum SO_2017_LW4 bin 69	173365	JALOCG010000040	fig|173365.13.peg.1671	23804	24196	393	130	Flagellar basal-body rod protein FlgB
Methylobacter tundripaludum SO_2017_LW4 bin 69	173365	JALOCG010000040	fig|173365.13.peg.1672	24199	24612	414	137	Flagellar basal-body rod protein FlgC
Methylobacter tundripaludum SO_2017_LW4 bin 69	173365	JALOCG010000040	fig|173365.13.peg.1673	24623	25303	681	226	Flagellar basal-body rod modification protein FlgD
Methylobacter tundripaludum SO_2017_LW4 bin 69	173365	JALOCG010000040	fig|173365.13.peg.1674	25319	27106	1788	595	Flagellar hook protein FlgE
Methylobacter tundripaludum SO_2017_LW4 bin 69	173365	JALOCG010000040	fig|173365.13.peg.1675	27189	27938	750	249	Flagellar basal-body rod protein FlgF
Methylobacter tundripaludum SO_2017_LW4 bin 69	173365	JALOCG010000040	fig|173365.13.peg.1676	28088	28876	789	262	Flagellar basal-body rod protein FlgG
Methylobacter tundripaludum SO_2017_LW4 bin 69	173365	JALOCG010000040	fig|173365.13.peg.1677	28893	29579	687	228	Flagellar L-ring protein FlgH
Methylobacter tundripaludum SO_2017_LW4 bin 69	173365	JALOCG010000040	fig|173365.13.peg.1678	29595	30695	1101	366	Flagellar P-ring protein FlgI
Methylobacter tundripaludum SO_2017_LW4 bin 69	173365	JALOCG010000040	fig|173365.13.peg.1679	30752	31807	1056	351	Flagellar protein FlgJ [peptidoglycan hydrolase]
Methylobacter tundripaludum SO_2017_LW4 bin 69	173365	JALOCG010000040	fig|173365.13.peg.1680	31851	34343	2493	830	Flagellar hook-associated protein FlgK
Methylobacter tundripaludum SO_2017_LW4 bin 69	173365	JALOCG010000048	fig|173365.13.peg.2594	11052	11507	456	151	Flagellar assembly factor FliW
Methylobacter tundripaludum SO_2017_LW4 bin 69	173365	JALOCG010000048	fig|173365.13.peg.2592	8941	9591	651	216	Flagellar protein FlgP
Methylobacter tundripaludum SO_2017_LW4 bin 69	173365	JALOCG010000051	fig|173365.13.peg.2999	24614	25426	813	270	Flagellar motor rotation protein MotA
Methylobacter tundripaludum SO_2017_LW4 bin 69	173365	JALOCG010000051	fig|173365.13.peg.3000	25451	26335	885	294	Flagellar motor rotation protein MotB
Methylobacter tundripaludum SO_2017_LW4 bin 69	173365	JALOCG010000052	fig|173365.13.peg.3021	10421	11437	1017	338	Flagellar motor switch protein FliG
Methylobacter tundripaludum SO_2017_LW4 bin 69	173365	JALOCG010000052	fig|173365.13.peg.3022	11430	13256	1827	608	Flagellar M-ring protein FliF
Methylobacter tundripaludum SO_2017_LW4 bin 69	173365	JALOCG010000052	fig|173365.13.peg.3023	13282	13596	315	104	Flagellar hook-basal body complex protein FliE
Methylobacter tundripaludum SO_2017_LW4 bin 69	173365	JALOCG010000052	fig|173365.13.peg.3024	13658	15037	1380	459	Flagellar two-component response regulator FleR
Methylobacter tundripaludum SO_2017_LW4 bin 69	173365	JALOCG010000052	fig|173365.13.peg.3025	15024	16325	1302	433	Flagellar sensor histidine kinase FleS
Methylobacter tundripaludum SO_2017_LW4 bin 69	173365	JALOCG010000052	fig|173365.13.peg.3026	16470	17969	1500	499	Flagellar regulatory protein FleQ
Methylobacter tundripaludum SO_2017_LW4 bin 69	173365	JALOCG010000052	fig|173365.13.peg.3017	6089	7741	1653	550	Flagellar hook-length control protein FliK
Methylobacter tundripaludum SO_2017_LW4 bin 69	173365	JALOCG010000052	fig|173365.13.peg.3018	7770	8228	459	152	Flagellar protein FliJ
Methylobacter tundripaludum SO_2017_LW4 bin 69	173365	JALOCG010000052	fig|173365.13.peg.3020	9613	10434	822	273	Flagellar assembly protein FliH
Methylobacter tundripaludum SO_2017_LW4 bin 69	173365	JALOCG010000081	fig|173365.13.peg.1090	6124	6516	393	130	Flagellar biosynthesis protein FliS
Methylobacter tundripaludum strain OWC-G53F	173366	PTIY01000001	fig|173365.5.peg.124	121281	121931	651	216	Flagellar protein FlgP
Methylobacter tundripaludum strain OWC-G53F	173366	PTIY01000001	fig|173365.5.peg.126	123392	123847	456	151	Flagellar assembly factor FliW
Methylobacter tundripaludum strain OWC-G53F	173366	PTIY01000002	fig|173365.5.peg.594	155614	156573	960	319	Flagellar motor rotation protein MotB
Methylobacter tundripaludum strain OWC-G53F	173366	PTIY01000002	fig|173365.5.peg.595	156577	157425	849	282	Flagellar motor rotation protein MotA
Methylobacter tundripaludum strain OWC-G53F	173366	PTIY01000002	fig|173365.5.peg.661	233488	233850	363	120	Chemotaxis regulator - transmits chemoreceptor signals to flagellar motor components CheY
Methylobacter tundripaludum strain OWC-G53F	173366	PTIY01000003	fig|173365.5.peg.1219	338164	338532	369	122	Chemotaxis regulator - transmits chemoreceptor signals to flagellar motor components CheY
Methylobacter tundripaludum strain OWC-G53F	173366	PTIY01000004	fig|173365.5.peg.1518	312417	314423	2007	668	Flagellar cap protein FliD
Methylobacter tundripaludum strain OWC-G53F	173366	PTIY01000006	fig|173365.5.peg.2026	203001	205493	2493	830	Flagellar hook-associated protein FlgK
Methylobacter tundripaludum strain OWC-G53F	173366	PTIY01000006	fig|173365.5.peg.2027	205537	206592	1056	351	Flagellar protein FlgJ [peptidoglycan hydrolase]
Methylobacter tundripaludum strain OWC-G53F	173366	PTIY01000006	fig|173365.5.peg.2028	206649	207749	1101	366	Flagellar P-ring protein FlgI
Methylobacter tundripaludum strain OWC-G53F	173366	PTIY01000006	fig|173365.5.peg.2029	207765	208451	687	228	Flagellar L-ring protein FlgH
Methylobacter tundripaludum strain OWC-G53F	173366	PTIY01000006	fig|173365.5.peg.2030	208468	209256	789	262	Flagellar basal-body rod protein FlgG
Methylobacter tundripaludum strain OWC-G53F	173366	PTIY01000006	fig|173365.5.peg.2031	209406	210155	750	249	Flagellar basal-body rod protein FlgF
Methylobacter tundripaludum strain OWC-G53F	173366	PTIY01000006	fig|173365.5.peg.2032	210238	212040	1803	600	Flagellar hook protein FlgE
Methylobacter tundripaludum strain OWC-G53F	173366	PTIY01000006	fig|173365.5.peg.2033	212056	212736	681	226	Flagellar basal-body rod modification protein FlgD
Methylobacter tundripaludum strain OWC-G53F	173366	PTIY01000006	fig|173365.5.peg.2034	212747	213160	414	137	Flagellar basal-body rod protein FlgC
Methylobacter tundripaludum strain OWC-G53F	173366	PTIY01000006	fig|173365.5.peg.2035	213163	213555	393	130	Flagellar basal-body rod protein FlgB
Methylobacter tundripaludum strain OWC-G53F	173366	PTIY01000006	fig|173365.5.peg.2066	243354	243746	393	130	Flagellar biosynthesis protein FliS
Methylobacter tundripaludum strain OWC-G53F	173366	PTIY01000009	fig|173365.5.peg.2525	81450	82949	1500	499	Flagellar regulatory protein FleQ
Methylobacter tundripaludum strain OWC-G53F	173366	PTIY01000009	fig|173365.5.peg.2526	83094	84395	1302	433	Flagellar sensor histidine kinase FleS
Methylobacter tundripaludum strain OWC-G53F	173366	PTIY01000009	fig|173365.5.peg.2527	84382	85761	1380	459	Flagellar two-component response regulator FleR
Methylobacter tundripaludum strain OWC-G53F	173366	PTIY01000009	fig|173365.5.peg.2528	85822	86136	315	104	Flagellar hook-basal body complex protein FliE
Methylobacter tundripaludum strain OWC-G53F	173366	PTIY01000009	fig|173365.5.peg.2529	86162	87988	1827	608	Flagellar M-ring protein FliF
Methylobacter tundripaludum strain OWC-G53F	173366	PTIY01000009	fig|173365.5.peg.2530	87981	88997	1017	338	Flagellar motor switch protein FliG
Methylobacter tundripaludum strain OWC-G53F	173366	PTIY01000009	fig|173365.5.peg.2531	88984	89805	822	273	Flagellar assembly protein FliH
Methylobacter tundripaludum strain OWC-G53F	173366	PTIY01000009	fig|173365.5.peg.2534	91681	93333	1653	550	Flagellar hook-length control protein FliK
Methylobacter tundripaludum strain OWC-G53F	173366	PTIY01000010	fig|173365.5.peg.2695	56901	57269	369	122	Chemotaxis regulator - transmits chemoreceptor signals to flagellar motor components CheY
Methylobacter tundripaludum strain OWC-G53F	173366	PTIY01000010	fig|173365.5.peg.2719	90710	91042	333	110	Uncharacterized homolog of the cytoplasmic domain of flagellar protein FhlB
Methylobacter tundripaludum strain OWC-G53F	173366	PTIY01000013	fig|173365.5.peg.3167	30907	31704	798	265	Flagellar motor rotation protein MotB
Methylobacter tundripaludum strain OWC-G53F	173366	PTIY01000013	fig|173365.5.peg.3168	31762	32517	756	251	Flagellar motor rotation protein MotA
Methylobacter tundripaludum strain OWC-G53F	173366	PTIY01000013	fig|173365.5.peg.3169	32549	33277	729	242	RNA polymerase sigma factor for flagellar operon
Methylobacter tundripaludum strain OWC-G53F	173366	PTIY01000013	fig|173365.5.peg.3170	33274	34107	834	277	Flagellar synthesis regulator FleN
Methylobacter tundripaludum strain OWC-G53F	173366	PTIY01000013	fig|173365.5.peg.3171	34139	35704	1566	521	Flagellar biosynthesis protein FlhF
Methylobacter tundripaludum strain OWC-G53F	173366	PTIY01000013	fig|173365.5.peg.3172	35721	37820	2100	699	Flagellar biosynthesis protein FlhA
Methylobacter tundripaludum strain OWC-G53F	173366	PTIY01000013	fig|173365.5.peg.3173	37827	38957	1131	376	Flagellar biosynthesis protein FlhB
Methylobacter tundripaludum strain OWC-G53F	173366	PTIY01000013	fig|173365.5.peg.3174	38961	39734	774	257	Flagellar biosynthesis protein FliR
Methylobacter tundripaludum strain OWC-G53F	173366	PTIY01000013	fig|173365.5.peg.3175	39738	40007	270	89	Flagellar biosynthesis protein FliQ
Methylobacter tundripaludum strain OWC-G53F	173366	PTIY01000013	fig|173365.5.peg.3176	40042	40800	759	252	Flagellar biosynthesis protein FliP
Methylobacter tundripaludum strain OWC-G53F	173366	PTIY01000013	fig|173365.5.peg.3177	40793	41251	459	152	Flagellar biosynthesis protein FliO
Methylobacter tundripaludum strain OWC-G53F	173366	PTIY01000013	fig|173365.5.peg.3178	41251	41631	381	126	Flagellar motor switch protein FliN
Methylobacter tundripaludum strain OWC-G53F	173366	PTIY01000013	fig|173365.5.peg.3179	41687	42682	996	331	Flagellar motor switch protein FliM
Methylobacter tundripaludum strain OWC-G53F	173366	PTIY01000013	fig|173365.5.peg.3230	94371	94760	390	129	Chemotaxis regulator - transmits chemoreceptor signals to flagellar motor components CheY
Methylobacter tundripaludum strain OWC-G53F	173366	PTIY01000014	fig|173365.5.peg.3282	41907	42719	813	270	Flagellar motor rotation protein MotA
Methylobacter tundripaludum strain OWC-G53F	173366	PTIY01000014	fig|173365.5.peg.3283	42744	43628	885	294	Flagellar motor rotation protein MotB
Methylobacter tundripaludum strain OWC-G53F	173366	PTIY01000015	fig|173365.5.peg.3370	21003	21458	456	151	Similar to flagellar basal body-associated protein FliL
Methylobacter tundripaludum strain OWC-DMM	173366	PTIZ01000001	fig|173365.6.peg.242	224710	225165	456	151	Flagellar assembly factor FliW
Methylobacter tundripaludum strain OWC-DMM	173366	PTIZ01000002	fig|173365.6.peg.999	227913	229751	1839	612	Flagellar hook-associated protein FlgK
Methylobacter tundripaludum strain OWC-DMM	173366	PTIZ01000002	fig|173365.6.peg.1000	229795	230847	1053	350	Flagellar protein FlgJ [peptidoglycan hydrolase]
Methylobacter tundripaludum strain OWC-DMM	173366	PTIZ01000002	fig|173365.6.peg.1001	230877	231980	1104	367	Flagellar P-ring protein FlgI
Methylobacter tundripaludum strain OWC-DMM	173366	PTIZ01000002	fig|173365.6.peg.798	23092	23556	465	154	Similar to flagellar basal body-associated protein FliL
Methylobacter tundripaludum strain OWC-DMM	173366	PTIZ01000002	fig|173365.6.peg.1002	231996	232706	711	236	Flagellar L-ring protein FlgH
Methylobacter tundripaludum strain OWC-DMM	173366	PTIZ01000002	fig|173365.6.peg.1003	232722	233510	789	262	Flagellar basal-body rod protein FlgG
Methylobacter tundripaludum strain OWC-DMM	173366	PTIZ01000002	fig|173365.6.peg.1004	233668	234408	741	246	Flagellar basal-body rod protein FlgF
Methylobacter tundripaludum strain OWC-DMM	173366	PTIZ01000002	fig|173365.6.peg.1005	234490	236283	1794	597	Flagellar hook protein FlgE
Methylobacter tundripaludum strain OWC-DMM	173366	PTIZ01000002	fig|173365.6.peg.1006	236280	236975	696	231	Flagellar basal-body rod modification protein FlgD
Methylobacter tundripaludum strain OWC-DMM	173366	PTIZ01000002	fig|173365.6.peg.1007	236986	237402	417	138	Flagellar basal-body rod protein FlgC
Methylobacter tundripaludum strain OWC-DMM	173366	PTIZ01000002	fig|173365.6.peg.1008	237405	237797	393	130	Flagellar basal-body rod protein FlgB
Methylobacter tundripaludum strain OWC-DMM	173366	PTIZ01000002	fig|173365.6.peg.1012	239166	239660	495	164	Flagellar biosynthesis protein FlgN
Methylobacter tundripaludum strain OWC-DMM	173366	PTIZ01000002	fig|173365.6.peg.1033	261059	261448	390	129	Flagellar biosynthesis protein FliS
Methylobacter tundripaludum strain OWC-DMM	173366	PTIZ01000002	fig|173365.6.peg.1034	261461	262852	1392	463	Flagellar cap protein FliD
Methylobacter tundripaludum strain OWC-DMM	173366	PTIZ01000003	fig|173365.6.peg.1556	194712	194996	285	94	Uncharacterized homolog of the cytoplasmic domain of flagellar protein FhlB
Methylobacter tundripaludum strain OWC-DMM	173366	PTIZ01000004	fig|173365.6.peg.2167	355929	356318	390	129	Chemotaxis regulator - transmits chemoreceptor signals to flagellar motor components CheY
Methylobacter tundripaludum strain OWC-DMM	173366	PTIZ01000006	fig|173365.6.peg.2860	341302	341664	363	120	Chemotaxis regulator - transmits chemoreceptor signals to flagellar motor components CheY
Methylobacter tundripaludum strain OWC-DMM	173366	PTIZ01000007	fig|173365.6.peg.3098	195292	196227	936	311	Flagellar motor rotation protein MotB
Methylobacter tundripaludum strain OWC-DMM	173366	PTIZ01000007	fig|173365.6.peg.3099	196294	197127	834	277	Flagellar motor rotation protein MotA
Methylobacter tundripaludum strain OWC-DMM	173366	PTIZ01000007	fig|173365.6.peg.3158	246110	246478	369	122	Chemotaxis regulator - transmits chemoreceptor signals to flagellar motor components CheY
Methylobacter tundripaludum strain OWC-DMM	173366	PTIZ01000007	fig|173365.6.peg.2941	41113	42021	909	302	Flagellar motor rotation protein MotB
Methylobacter tundripaludum strain OWC-DMM	173366	PTIZ01000007	fig|173365.6.peg.2942	42030	42878	849	282	Flagellar motor rotation protein MotA
Methylobacter tundripaludum strain OWC-DMM	173366	PTIZ01000009	fig|173365.6.peg.3541	87929	89452	1524	507	Flagellar hook-length control protein FliK
Methylobacter tundripaludum strain OWC-DMM	173366	PTIZ01000009	fig|173365.6.peg.3544	91336	92085	750	249	Flagellar assembly protein FliH
Methylobacter tundripaludum strain OWC-DMM	173366	PTIZ01000009	fig|173365.6.peg.3545	92072	93079	1008	335	Flagellar motor switch protein FliG
Methylobacter tundripaludum strain OWC-DMM	173366	PTIZ01000009	fig|173365.6.peg.3546	93072	94901	1830	609	Flagellar M-ring protein FliF
Methylobacter tundripaludum strain OWC-DMM	173366	PTIZ01000009	fig|173365.6.peg.3547	94924	95238	315	104	Flagellar hook-basal body complex protein FliE
Methylobacter tundripaludum strain OWC-DMM	173366	PTIZ01000009	fig|173365.6.peg.3548	95298	96704	1407	468	Flagellar two-component response regulator FleR
Methylobacter tundripaludum strain OWC-DMM	173366	PTIZ01000009	fig|173365.6.peg.3549	96691	97944	1254	417	Flagellar sensor histidine kinase FleS
Methylobacter tundripaludum strain OWC-DMM	173366	PTIZ01000009	fig|173365.6.peg.3550	98072	99523	1452	483	Flagellar regulatory protein FleQ
Methylobacter tundripaludum strain OWC-DMM	173366	PTIZ01000010	fig|173365.6.peg.3731	127198	127995	798	265	Flagellar motor rotation protein MotB
Methylobacter tundripaludum strain OWC-DMM	173366	PTIZ01000010	fig|173365.6.peg.3732	128053	128808	756	251	Flagellar motor rotation protein MotA
Methylobacter tundripaludum strain OWC-DMM	173366	PTIZ01000010	fig|173365.6.peg.3733	128827	129540	714	237	RNA polymerase sigma factor for flagellar operon
Methylobacter tundripaludum strain OWC-DMM	173366	PTIZ01000010	fig|173365.6.peg.3734	129552	130385	834	277	Flagellar synthesis regulator FleN
Methylobacter tundripaludum strain OWC-DMM	173366	PTIZ01000010	fig|173365.6.peg.3735	130417	131895	1479	492	Flagellar biosynthesis protein FlhF
Methylobacter tundripaludum strain OWC-DMM	173366	PTIZ01000010	fig|173365.6.peg.3736	131912	134011	2100	699	Flagellar biosynthesis protein FlhA
Methylobacter tundripaludum strain OWC-DMM	173366	PTIZ01000010	fig|173365.6.peg.3737	134018	135142	1125	374	Flagellar biosynthesis protein FlhB
Methylobacter tundripaludum strain OWC-DMM	173366	PTIZ01000010	fig|173365.6.peg.3738	135150	135866	717	238	Flagellar biosynthesis protein FliR
Methylobacter tundripaludum strain OWC-DMM	173366	PTIZ01000010	fig|173365.6.peg.3739	135927	136196	270	89	Flagellar biosynthesis protein FliQ
Methylobacter tundripaludum strain OWC-DMM	173366	PTIZ01000010	fig|173365.6.peg.3740	136213	136971	759	252	Flagellar biosynthesis protein FliP
Methylobacter tundripaludum strain OWC-DMM	173366	PTIZ01000010	fig|173365.6.peg.3741	136964	137407	444	147	Flagellar biosynthesis protein FliO
Methylobacter tundripaludum strain OWC-DMM	173366	PTIZ01000010	fig|173365.6.peg.3742	137407	137787	381	126	Flagellar motor switch protein FliN
Methylobacter tundripaludum strain OWC-DMM	173366	PTIZ01000010	fig|173365.6.peg.3743	137843	138838	996	331	Flagellar motor switch protein FliM
Methylobacter tundripaludum strain OWC-DMM	173366	PTIZ01000014	fig|173365.6.peg.4155	62495	62863	369	122	Chemotaxis regulator - transmits chemoreceptor signals to flagellar motor components CheY
Methylomagnum ishizawai strain RS11D-Pr	1.76099e+06	AP019783	fig|1760988.4.peg.1715	1735811	1743070	7260	2419	hypothetical protein formerly called flagellar hook-length control protein FliK
Methylomagnum ishizawai strain RS11D-Pr	1.76099e+06	AP019783	fig|1760988.4.peg.1965	2009019	2011109	2091	696	Flagellar biosynthesis protein FlhA
Methylomagnum ishizawai strain RS11D-Pr	1.76099e+06	AP019783	fig|1760988.4.peg.1966	2011154	2012755	1602	533	Flagellar biosynthesis protein FlhF
Methylomagnum ishizawai strain RS11D-Pr	1.76099e+06	AP019783	fig|1760988.4.peg.1967	2012784	2013614	831	276	Flagellar synthesis regulator FleN
Methylomagnum ishizawai strain RS11D-Pr	1.76099e+06	AP019783	fig|1760988.4.peg.1968	2013611	2014390	780	259	RNA polymerase sigma factor for flagellar operon
Methylomagnum ishizawai strain RS11D-Pr	1.76099e+06	AP019783	fig|1760988.4.peg.1969	2014588	2014974	387	128	Chemotaxis regulator - transmits chemoreceptor signals to flagellar motor components CheY
Methylomagnum ishizawai strain RS11D-Pr	1.76099e+06	AP019783	fig|1760988.4.peg.1973	2019023	2019766	744	247	Flagellar motor rotation protein MotA
Methylomagnum ishizawai strain RS11D-Pr	1.76099e+06	AP019783	fig|1760988.4.peg.1974	2019770	2020618	849	282	Flagellar motor rotation protein MotB
Methylomagnum ishizawai strain RS11D-Pr	1.76099e+06	AP019783	fig|1760988.4.peg.2136	2178245	2178613	369	122	Chemotaxis regulator - transmits chemoreceptor signals to flagellar motor components CheY
Methylomagnum ishizawai strain RS11D-Pr	1.76099e+06	AP019783	fig|1760988.4.peg.2223	2279719	2281761	2043	680	Flagellar cap protein FliD
Methylomagnum ishizawai strain RS11D-Pr	1.76099e+06	AP019783	fig|1760988.4.peg.2475	2542953	2544347	1395	464	Flagellar regulatory protein FleQ
Methylomagnum ishizawai strain RS11D-Pr	1.76099e+06	AP019783	fig|1760988.4.peg.2477	2544644	2544961	318	105	Flagellar hook-basal body complex protein FliE
Methylomagnum ishizawai strain RS11D-Pr	1.76099e+06	AP019783	fig|1760988.4.peg.2478	2544971	2546800	1830	609	Flagellar M-ring protein FliF
Methylomagnum ishizawai strain RS11D-Pr	1.76099e+06	AP019783	fig|1760988.4.peg.2480	2547027	2548037	1011	336	Flagellar motor switch protein FliG
Methylomagnum ishizawai strain RS11D-Pr	1.76099e+06	AP019783	fig|1760988.4.peg.2481	2548024	2548857	834	277	Flagellar assembly protein FliH
Methylomagnum ishizawai strain RS11D-Pr	1.76099e+06	AP019783	fig|1760988.4.peg.2929	3010240	3010641	402	133	Flagellar basal-body rod protein FlgB
Methylomagnum ishizawai strain RS11D-Pr	1.76099e+06	AP019783	fig|1760988.4.peg.2930	3010644	3011081	438	145	Flagellar basal-body rod protein FlgC
Methylomagnum ishizawai strain RS11D-Pr	1.76099e+06	AP019783	fig|1760988.4.peg.2931	3011094	3011777	684	227	Flagellar basal-body rod modification protein FlgD
Methylomagnum ishizawai strain RS11D-Pr	1.76099e+06	AP019783	fig|1760988.4.peg.2932	3011802	3013070	1269	422	Flagellar hook protein FlgE
Methylomagnum ishizawai strain RS11D-Pr	1.76099e+06	AP019783	fig|1760988.4.peg.2933	3013111	3013851	741	246	Flagellar basal-body rod protein FlgF
Methylomagnum ishizawai strain RS11D-Pr	1.76099e+06	AP019783	fig|1760988.4.peg.2934	3013895	3014683	789	262	Flagellar basal-body rod protein FlgG
Methylomagnum ishizawai strain RS11D-Pr	1.76099e+06	AP019783	fig|1760988.4.peg.2935	3014695	3015387	693	230	Flagellar L-ring protein FlgH
Methylomagnum ishizawai strain RS11D-Pr	1.76099e+06	AP019783	fig|1760988.4.peg.2936	3015405	3016547	1143	380	Flagellar P-ring protein FlgI
Methylomagnum ishizawai strain RS11D-Pr	1.76099e+06	AP019783	fig|1760988.4.peg.2937	3016560	3017471	912	303	Flagellar protein FlgJ [peptidoglycan hydrolase]
Methylomagnum ishizawai strain RS11D-Pr	1.76099e+06	AP019783	fig|1760988.4.peg.2938	3017616	3019316	1701	566	Flagellar hook-associated protein FlgK
Methylomagnum ishizawai strain RS11D-Pr	1.76099e+06	AP019783	fig|1760988.4.peg.2939	3019321	3020616	1296	431	Flagellar hook-associated protein FlgL
Methylomagnum ishizawai strain RS11D-Pr	1.76099e+06	AP019783	fig|1760988.4.peg.3555	3663892	3664746	855	284	Flagellar motor rotation protein MotA
Methylomagnum ishizawai strain RS11D-Pr	1.76099e+06	AP019783	fig|1760988.4.peg.3556	3664771	3665892	1122	373	Flagellar motor rotation protein MotB
Methylomagnum ishizawai strain RS11D-Pr	1.76099e+06	AP019783	fig|1760988.4.peg.3941	4087551	4087913	363	120	Chemotaxis regulator - transmits chemoreceptor signals to flagellar motor components CheY
Methylomagnum ishizawai strain RS11D-Pr	1.76099e+06	AP019783	fig|1760988.4.peg.4381	4520773	4521558	786	261	Chemotaxis regulator - transmits chemoreceptor signals to flagellar motor components CheY
Methylomagnum ishizawai strain RS11D-Pr	1.76099e+06	AP019783	fig|1760988.4.peg.4442	4582164	4582928	765	254	Flagellar biosynthesis protein FliP
Methylomagnum ishizawai strain RS11D-Pr	1.76099e+06	AP019783	fig|1760988.4.peg.4444	4583338	4583805	468	155	Flagellar motor switch protein FliN
Methylomagnum ishizawai strain RS11D-Pr	1.76099e+06	AP019783	fig|1760988.4.peg.4445	4583845	4584852	1008	335	Flagellar motor switch protein FliM
Methylomagnum ishizawai strain RS11D-Pr	1.76099e+06	AP019783	fig|1760988.4.peg.595	633881	635011	1131	376	Flagellar biosynthesis protein FlhB
Methylomagnum ishizawai strain RS11D-Pr	1.76099e+06	AP019783	fig|1760988.4.peg.596	635015	635785	771	256	Flagellar biosynthesis protein FliR
Methylomagnum ishizawai strain RS11D-Pr	1.76099e+06	AP019783	fig|1760988.4.peg.597	635789	636058	270	89	Flagellar biosynthesis protein FliQ
Methylomagnum ishizawai strain RS11D-Pr	1.76099e+06	AP019783	fig|1760988.4.peg.950	964137	965009	873	290	Flagellar motor rotation protein MotB
Methylomagnum ishizawai strain RS11D-Pr	1.76099e+06	AP019783	fig|1760988.4.peg.979	990007	990324	318	105	Uncharacterized homolog of the cytoplasmic domain of flagellar protein FhlB
Methylomonas sp. ZR1	1.79707e+06	RCST01000001	fig|1797072.3.peg.1266	1340800	1341408	609	202	Flagellar transcriptional activator FlhC
Methylomonas sp. ZR1	1.79707e+06	RCST01000001	fig|1797072.3.peg.2016	2105194	2105655	462	153	Similar to flagellar basal body-associated protein FliL
Methylomonas sp. ZR1	1.79707e+06	RCST01000001	fig|1797072.3.peg.2567	2703786	2704070	285	94	Uncharacterized homolog of the cytoplasmic domain of flagellar protein FhlB
Methylomonas sp. ZR1	1.79707e+06	RCST01000001	fig|1797072.3.peg.2881	3008685	3009278	594	197	Flagellar transcriptional activator FlhC
Methylomonas sp. ZR1	1.79707e+06	RCST01000001	fig|1797072.3.peg.3037	3166518	3167699	1182	393	Flagellar protein FlgT
Methylomonas sp. ZR1	1.79707e+06	RCST01000001	fig|1797072.3.peg.3224	3356346	3356732	387	128	Flagellar biosynthesis protein FliS
Methylomonas sp. ZR1	1.79707e+06	RCST01000001	fig|1797072.3.peg.3225	3356748	3358145	1398	465	Flagellar cap protein FliD
Methylomonas sp. ZR1	1.79707e+06	RCST01000001	fig|1797072.3.peg.3226	3358172	3358609	438	145	Flagellar protein FlaG
Methylomonas sp. ZR1	1.79707e+06	RCST01000001	fig|1797072.3.peg.3690	3823582	3824376	795	264	Chemotaxis regulator - transmits chemoreceptor signals to flagellar motor components CheY
Methylomonas sp. ZR1	1.79707e+06	RCST01000001	fig|1797072.3.peg.3721	3852168	3852536	369	122	Chemotaxis regulator - transmits chemoreceptor signals to flagellar motor components CheY
Methylomonas sp. ZR1	1.79707e+06	RCST01000001	fig|1797072.3.peg.3789	3927987	3928958	972	323	Flagellar motor rotation protein MotB
Methylomonas sp. ZR1	1.79707e+06	RCST01000001	fig|1797072.3.peg.3790	3928970	3929815	846	281	Flagellar motor rotation protein MotA
Methylomonas sp. ZR1	1.79707e+06	RCST01000001	fig|1797072.3.peg.4355	4504495	4504953	459	152	Flagellar assembly factor FliW
Methylomonas sp. ZR1	1.79707e+06	RCST01000001	fig|1797072.3.peg.4502	4654658	4655206	549	182	Flagellar basal body-associated protein FliL
Methylomonas sp. ZR1	1.79707e+06	RCST01000001	fig|1797072.3.peg.4503	4655207	4656187	981	326	Flagellar motor switch protein FliM
Methylomonas sp. ZR1	1.79707e+06	RCST01000001	fig|1797072.3.peg.4504	4656206	4656658	453	150	Flagellar motor switch protein FliN
Methylomonas sp. ZR1	1.79707e+06	RCST01000001	fig|1797072.3.peg.4505	4656658	4657101	444	147	Flagellar biosynthesis protein FliO
Methylomonas sp. ZR1	1.79707e+06	RCST01000001	fig|1797072.3.peg.4506	4657094	4657840	747	248	Flagellar biosynthesis protein FliP
Methylomonas sp. ZR1	1.79707e+06	RCST01000001	fig|1797072.3.peg.4507	4657850	4658122	273	90	Flagellar biosynthesis protein FliQ
Methylomonas sp. ZR1	1.79707e+06	RCST01000001	fig|1797072.3.peg.4508	4658119	4658895	777	258	Flagellar biosynthesis protein FliR
Methylomonas sp. ZR1	1.79707e+06	RCST01000001	fig|1797072.3.peg.4509	4658896	4660023	1128	375	Flagellar biosynthesis protein FlhB
Methylomonas sp. ZR1	1.79707e+06	RCST01000001	fig|1797072.3.peg.4510	4660043	4662148	2106	701	Flagellar biosynthesis protein FlhA
Methylomonas sp. ZR1	1.79707e+06	RCST01000001	fig|1797072.3.peg.4511	4662164	4663579	1416	471	Flagellar biosynthesis protein FlhF
Methylomonas sp. ZR1	1.79707e+06	RCST01000001	fig|1797072.3.peg.4512	4663611	4664444	834	277	Flagellar synthesis regulator FleN
Methylomonas sp. ZR1	1.79707e+06	RCST01000001	fig|1797072.3.peg.4513	4664441	4665187	747	248	RNA polymerase sigma factor for flagellar operon
Methylomonas sp. ZR1	1.79707e+06	RCST01000001	fig|1797072.3.peg.4514	4665287	4665661	375	124	Chemotaxis regulator - transmits chemoreceptor signals to flagellar motor components CheY
Methylomonas sp. ZR1	1.79707e+06	RCST01000001	fig|1797072.3.peg.4518	4669726	4670472	747	248	Flagellar motor rotation protein MotA
Methylomonas sp. ZR1	1.79707e+06	RCST01000001	fig|1797072.3.peg.4519	4670483	4671364	882	293	Flagellar motor rotation protein MotB
Methylomonas sp. ZR1	1.79707e+06	RCST01000001	fig|1797072.3.peg.4963	5078167	5079834	1668	555	Flagellar hook-associated protein FlgK
Methylomonas sp. ZR1	1.79707e+06	RCST01000001	fig|1797072.3.peg.4964	5079844	5080893	1050	349	Flagellar protein FlgJ [peptidoglycan hydrolase]
Methylomonas sp. ZR1	1.79707e+06	RCST01000001	fig|1797072.3.peg.4965	5080939	5082027	1089	362	Flagellar P-ring protein FlgI
Methylomonas sp. ZR1	1.79707e+06	RCST01000001	fig|1797072.3.peg.4966	5082050	5082754	705	234	Flagellar L-ring protein FlgH
Methylomonas sp. ZR1	1.79707e+06	RCST01000001	fig|1797072.3.peg.4967	5082770	5083558	789	262	Flagellar basal-body rod protein FlgG
Methylomonas sp. ZR1	1.79707e+06	RCST01000001	fig|1797072.3.peg.4968	5083610	5084353	744	247	Flagellar basal-body rod protein FlgF
Methylomonas sp. ZR1	1.79707e+06	RCST01000001	fig|1797072.3.peg.4969	5084370	5085701	1332	443	Flagellar hook protein FlgE
Methylomonas sp. ZR1	1.79707e+06	RCST01000001	fig|1797072.3.peg.4970	5085715	5086395	681	226	Flagellar basal-body rod modification protein FlgD
Methylomonas sp. ZR1	1.79707e+06	RCST01000001	fig|1797072.3.peg.4971	5086403	5086819	417	138	Flagellar basal-body rod protein FlgC
Methylomonas sp. ZR1	1.79707e+06	RCST01000001	fig|1797072.3.peg.4972	5086822	5087217	396	131	Flagellar basal-body rod protein FlgB
Methylomonas sp. ZR1	1.79707e+06	RCST01000001	fig|1797072.3.peg.4975	5089351	5090040	690	229	Flagellar basal-body P-ring formation protein FlgA
Methylomonas sp. ZR1	1.79707e+06	RCST01000001	fig|1797072.3.peg.4978	5090948	5091727	780	259	Flagellar brake protein YcgR
Methylomonas sp. ZR1	1.79707e+06	RCST01000001	fig|1797072.3.peg.528	552914	554119	1206	401	Flagellar sensor histidine kinase FleS
Methylomonas sp. ZR1	1.79707e+06	RCST01000001	fig|1797072.3.peg.529	554106	555488	1383	460	Flagellar two-component response regulator FleR
Methylomonas sp. ZR1	1.79707e+06	RCST01000001	fig|1797072.3.peg.530	555544	555855	312	103	Flagellar hook-basal body complex protein FliE
Methylomonas sp. ZR1	1.79707e+06	RCST01000001	fig|1797072.3.peg.531	555873	557624	1752	583	Flagellar M-ring protein FliF
Methylomonas sp. ZR1	1.79707e+06	RCST01000001	fig|1797072.3.peg.532	557617	558627	1011	336	Flagellar motor switch protein FliG
Methylomonas sp. ZR1	1.79707e+06	RCST01000001	fig|1797072.3.peg.535	560664	561116	453	150	Flagellar protein FliJ
Methylomonas sp. ZR1	1.79707e+06	RCST01000001	fig|1797072.3.peg.536	561144	562505	1362	453	Flagellar hook-length control protein FliK
Methylomonas sp. ZR1	1.79707e+06	RCST01000001	fig|1797072.3.peg.644	667672	668034	363	120	Chemotaxis regulator - transmits chemoreceptor signals to flagellar motor components CheY
Methylomonas sp. ZR1	1.79707e+06	RCST01000001	fig|1797072.3.peg.677	699324	700130	807	268	Chemotaxis regulator - transmits chemoreceptor signals to flagellar motor components CheY
Methylomonas sp. ZR1	1.79707e+06	RCST01000001	fig|1797072.3.peg.754	793453	794868	1416	471	Flagellar regulatory protein FleQ
Methylomonas sp. ZR1	1.79707e+06	RCST01000001	fig|1797072.3.peg.844	890120	890488	369	122	Chemotaxis regulator - transmits chemoreceptor signals to flagellar motor components CheY
Methylomonas sp. EbA	1.85456e+06	JACXSS010000001	fig|1854563.3.peg.1074	1065661	1066842	1182	393	Flagellar protein FlgT
Methylomonas sp. EbA	1.85456e+06	JACXSS010000001	fig|1854563.3.peg.1306	1320613	1320816	204	67	flagellar brake protein
Methylomonas sp. EbA	1.85456e+06	JACXSS010000001	fig|1854563.3.peg.1433	1447345	1448550	1206	401	Flagellar sensor histidine kinase FleS
Methylomonas sp. EbA	1.85456e+06	JACXSS010000001	fig|1854563.3.peg.1434	1448537	1449919	1383	460	Flagellar two-component response regulator FleR
Methylomonas sp. EbA	1.85456e+06	JACXSS010000001	fig|1854563.3.peg.1435	1449976	1450287	312	103	Flagellar hook-basal body complex protein FliE
Methylomonas sp. EbA	1.85456e+06	JACXSS010000001	fig|1854563.3.peg.1436	1450306	1452057	1752	583	Flagellar M-ring protein FliF
Methylomonas sp. EbA	1.85456e+06	JACXSS010000001	fig|1854563.3.peg.1437	1452050	1453060	1011	336	Flagellar motor switch protein FliG
Methylomonas sp. EbA	1.85456e+06	JACXSS010000001	fig|1854563.3.peg.1440	1455097	1455549	453	150	Flagellar protein FliJ
Methylomonas sp. EbA	1.85456e+06	JACXSS010000001	fig|1854563.3.peg.1441	1455577	1456938	1362	453	Flagellar hook-length control protein FliK
Methylomonas sp. EbA	1.85456e+06	JACXSS010000001	fig|1854563.3.peg.1548	1561128	1561490	363	120	Chemotaxis regulator - transmits chemoreceptor signals to flagellar motor components CheY
Methylomonas sp. EbA	1.85456e+06	JACXSS010000001	fig|1854563.3.peg.1581	1596204	1597010	807	268	Chemotaxis regulator - transmits chemoreceptor signals to flagellar motor components CheY
Methylomonas sp. EbA	1.85456e+06	JACXSS010000001	fig|1854563.3.peg.1657	1688586	1690001	1416	471	Flagellar regulatory protein FleQ
Methylomonas sp. EbA	1.85456e+06	JACXSS010000001	fig|1854563.3.peg.1813	1836769	1837230	462	153	Similar to flagellar basal body-associated protein FliL
Methylomonas sp. EbA	1.85456e+06	JACXSS010000001	fig|1854563.3.peg.170	188175	188633	459	152	Flagellar assembly factor FliW
Methylomonas sp. EbA	1.85456e+06	JACXSS010000001	fig|1854563.3.peg.2761	2780247	2781875	1629	542	Chemotaxis regulator - transmits chemoreceptor signals to flagellar motor components CheY
Methylomonas sp. EbA	1.85456e+06	JACXSS010000001	fig|1854563.3.peg.3046	3049510	3049878	369	122	Chemotaxis regulator - transmits chemoreceptor signals to flagellar motor components CheY
Methylomonas sp. EbA	1.85456e+06	JACXSS010000001	fig|1854563.3.peg.324	335030	335578	549	182	Flagellar basal body-associated protein FliL
Methylomonas sp. EbA	1.85456e+06	JACXSS010000001	fig|1854563.3.peg.325	335579	336559	981	326	Flagellar motor switch protein FliM
Methylomonas sp. EbA	1.85456e+06	JACXSS010000001	fig|1854563.3.peg.326	336578	337030	453	150	Flagellar motor switch protein FliN
Methylomonas sp. EbA	1.85456e+06	JACXSS010000001	fig|1854563.3.peg.327	337030	337473	444	147	Flagellar biosynthesis protein FliO
Methylomonas sp. EbA	1.85456e+06	JACXSS010000001	fig|1854563.3.peg.328	337508	338215	708	235	Flagellar biosynthesis protein FliP
Methylomonas sp. EbA	1.85456e+06	JACXSS010000001	fig|1854563.3.peg.329	338225	338497	273	90	Flagellar biosynthesis protein FliQ
Methylomonas sp. EbA	1.85456e+06	JACXSS010000001	fig|1854563.3.peg.330	338494	339270	777	258	Flagellar biosynthesis protein FliR
Methylomonas sp. EbA	1.85456e+06	JACXSS010000001	fig|1854563.3.peg.331	339271	340398	1128	375	Flagellar biosynthesis protein FlhB
Methylomonas sp. EbA	1.85456e+06	JACXSS010000001	fig|1854563.3.peg.332	340418	342523	2106	701	Flagellar biosynthesis protein FlhA
Methylomonas sp. EbA	1.85456e+06	JACXSS010000001	fig|1854563.3.peg.333	342539	343945	1407	468	Flagellar biosynthesis protein FlhF
Methylomonas sp. EbA	1.85456e+06	JACXSS010000001	fig|1854563.3.peg.334	343938	344810	873	290	Flagellar synthesis regulator FleN
Methylomonas sp. EbA	1.85456e+06	JACXSS010000001	fig|1854563.3.peg.335	344807	345553	747	248	RNA polymerase sigma factor for flagellar operon
Methylomonas sp. EbA	1.85456e+06	JACXSS010000001	fig|1854563.3.peg.336	345653	346027	375	124	Chemotaxis regulator - transmits chemoreceptor signals to flagellar motor components CheY
Methylomonas sp. EbA	1.85456e+06	JACXSS010000001	fig|1854563.3.peg.340	350086	350832	747	248	Flagellar motor rotation protein MotA
Methylomonas sp. EbA	1.85456e+06	JACXSS010000001	fig|1854563.3.peg.341	350843	351724	882	293	Flagellar motor rotation protein MotB
Methylomonas sp. EbA	1.85456e+06	JACXSS010000001	fig|1854563.3.peg.3778	3786064	3786348	285	94	Uncharacterized homolog of the cytoplasmic domain of flagellar protein FhlB
Methylomonas sp. EbA	1.85456e+06	JACXSS010000001	fig|1854563.3.peg.4665	4751226	4752020	795	264	Chemotaxis regulator - transmits chemoreceptor signals to flagellar motor components CheY
Methylomonas sp. EbA	1.85456e+06	JACXSS010000001	fig|1854563.3.peg.4713	4801307	4802278	972	323	Flagellar motor rotation protein MotB
Methylomonas sp. EbA	1.85456e+06	JACXSS010000001	fig|1854563.3.peg.4714	4802285	4803133	849	282	Flagellar motor rotation protein MotA
Methylomonas sp. EbA	1.85456e+06	JACXSS010000001	fig|1854563.3.peg.4762	4857714	4858082	369	122	Chemotaxis regulator - transmits chemoreceptor signals to flagellar motor components CheY
Methylomonas sp. EbA	1.85456e+06	JACXSS010000001	fig|1854563.3.peg.637	619373	620281	909	302	Flagellar hook-associated protein FlgL
Methylomonas sp. EbA	1.85456e+06	JACXSS010000001	fig|1854563.3.peg.638	620291	621958	1668	555	Flagellar hook-associated protein FlgK
Methylomonas sp. EbA	1.85456e+06	JACXSS010000001	fig|1854563.3.peg.639	621968	623011	1044	347	Flagellar protein FlgJ [peptidoglycan hydrolase]
Methylomonas sp. EbA	1.85456e+06	JACXSS010000001	fig|1854563.3.peg.640	623057	624145	1089	362	Flagellar P-ring protein FlgI
Methylomonas sp. EbA	1.85456e+06	JACXSS010000001	fig|1854563.3.peg.641	624168	624872	705	234	Flagellar L-ring protein FlgH
[truncated: 3,553 more rows]

## Sheet: Table S8
		Predicted by FEET							Predicted by InterPro
Genome Name	genome id	type	gene_oid	Num_of_C..CH	Num_of_C.CH	Num_of_C...CH	Num_of_C...........[!=C]..CH	Total_Num_of_heme	Type	Membrane associated	protein	seq
Methylomonas LK_3			23_10							membrane bind
Methylobacter luteus IMV-B-3098	1.09555e+06		ATYJ01000001_412	10	0	0	0	10		outside the membrane	>ATYJ01000001_412	MRLIYLTLIASIAAIMSCSSLSPPSLKPELSTAQSHAQYVGASVCSSCHELETSHWNHTIHARIPHLAAPDNPKVEGCETCHGPGSEHVSDPADKSKIMAFTRQSGSTIRQQNSMCLQCHRGKERIAWPGSAHQMNDLSCSDCHNPMARFSEKGLLGKDGINQTCYSCHQQQRAEFRKRSHMPLPEGKVTCTDCHNPHGSGTAPLLKADTVNQVCYQCHQEKRGPFIWEHAPVRENCLNCHQPHGSNHESLLVSTRPFLCQTCHTNRGHPNDLLTTGNLASASNPDARLINRSCQNCHAQIHGSNHAAGMLFHR*
Methylobacter luteus IMV-B-3098	1.09555e+06		ATYJ01000001_582	7	0	0	0	7		outside the membrane	>ATYJ01000001_582	MQKYKSLLNIISNYSNGETMNPFHAGLLTTVLAASLSVMPVLAQEAPKTGNSKTFKANEQKPKHDYNITINYELGMHCTGFDFSYCCVLPPYNSIQSQVIKTSGAPNQFPRLLAADPNDPTVLVDGDKRMKLEYGHIDNTFSEGTKLAYWNIPYDVNHDGKYGNNENVANAYFTHLYVYKGLKGDNPGKTSKDSEKQRIGIEIPIPRDMGPAGAAAPSPMRGGHLHYTGDDGTVVYTKSPVLDNVPIMLTDPGIWDALGLPLTPFYDEMMKKSPLEIVESDIRPYQEAWVGLVDAKTNQPIIDSHSGKPVKFIGTNPIDVPNCANCHANENANGDTFTLYKQEKAFWKGLGASDYMADLKATSISILQIHDARHGTQFTAKYNPASRDTQNRLGADPVL…
Methylobacter luteus IMV-B-3098	1.09555e+06		ATYJ01000001_1431	8	0	0	0	8		outside the membrane	>ATYJ01000001_1431	MAAVIRNRYLLAVSIVLAVTVLTAGWLAYLELPAIPPVLVQPPIQTDASYVGRHSCAGCHAEQDRLWQGSHHDLAMQEASDETVLGDFRDAEFRKDGVVTRFFRQDERYRVRTDGPDGKPDDFEIKYTFGFTPLQQYLAELPGGRLQALSIAWDSRPKEQGGQRWFHLYPNEKIDHTDELHWTKRSQNWNFMCAECHSTNLQKNYDPASRTYNTNASEIDVACEACHGPGSHHVAWAERKPGYERIDAGTRGLTVLLNERQGVQWTIDPESGNAHRSTARGSEQEIQVCARCHARRAQLSGDYRHGPLMDTHLPSLLQETLYHADGQIEGEVYEYGSFLQSRMYAAGVTCSDCHEPHSLKLRAPGNGVCLQCHNQDKYATEKHHFHRTGSDGAQCVNCH…
Methylobacter luteus IMV-B-3098	1.09555e+06		ATYJ01000003_377	5	0	0	0	5		outside the membrane	>ATYJ01000003_377	MQRYYYFFIYLLWLVMALSIHDAQAAKKDTTPDPFFFTDQTNVALNTVVTSNTITVSGINASTSISVTGGQYSRNGGAFTSASGSVYNGDTVRVQQTSSSSYSMTTNTALTIGGVKDTFSVTTQTGSADITPDTFGFTAQTGVALNTAVASNAATITGINAPASVTVSGGSYSINGGAFTSAAGSLNNGDSVRVQLTSSSQYSTQTTATLTIGGVQGVFQVTTLADAGGFLLEPASGGDPNFTSTHFSGSGNCLMCHNNLTDAQGKDVSIETDWSSTMMANSARDPLWRAKVRSELNRNPQLADVISDKCTRCHAPMANFEAKKSGEPMQILDGGFLDASHSRHDSALNGVSCTLCHQIQDAPNLGTLSGFTGKYEIGSNKLIYGPYDNLTPNPMVMNT…
Methylobacter luteus IMV-B-3098	1.09555e+06		ATYJ01000003_989	8	0	0	0	8	HAO	outside the membrane	>ATYJ01000003_989	MKHKMLYLLSMLLFSLIGLSCIGVANADIPDFEQLRKNYYDSHPGKGSHADYWEPIPIQKYWNPKDFYKPPKTVQGEFGRDDCVGCHQATSPGAFHAWKNSVHSDLAAIRNLPDSDVRAYKKEKLAQVEANLVKQDLLEEGQQLDQVGCIDCHGGVGKETVNHAENLVMPDRAACGSCHLNEFAEAESERDQEWPQKQWGKGHPSHAVDWEANVENTVWAAMPQREVAQGCDMCHYQQNKCDGCHTRHTFSVAEARQPEACSTCHNGVDHNEFENFMMSKHGTQYQTQGKAKWNFEVPLKDAITKGGYTAPTCQVCHFEYKGEYSHNLVRKVRWAFNPTPAIADNLGDPWFEDRKQAWIDTCSLCHSASFAKAYLDTADKGTIQGLAVEQEAKKVVTKL…
Methylobacter marinus A45	674036		ARVS01000001_581	7	0	0	0	7		outside the membrane	>ARVS01000001_581	MNILPIGLLTTMLAGSLSVLPVFAQETPGTGSSKIFKANEQKPKNDYNITINYELGMHCTGFDFSYCCVLPPYNSIQSQVIKTAGSTYEFPRLLVADPNDPTVLVDGDKRMKLEYGHVGNTFSEGTKLAYWNIPYDVNHDGKYGNNENVANAYFTHLYVYKGLKGDNPDNTSKDSEKQRIGIEIPIPRDMGPAGAAAPSPVKGGHLHYTGDKGTVVYTKSPVLDNVPIVLTNPGIWDALGLPLTPFYDDMMRKSPLEIVESDIRPYQEAWVGLVDAKTNQPIIDSHSGNPVKFIGTNPIDVPNCSNCHSNENANGDTFTLYKQEKAFWKGLGASDYMADLKATSISILQIHDARHGTQFTAKYDPSSRATQNRLGADPVLCQQCHADNVIGVLQSKGVV…
Methylobacter marinus A45	674036		ARVS01000002_670	5	0	0	0	5		outside the membrane	>ARVS01000002_670	MLLANDNNPAQAGFPSVTRVFMPRYYFFAYLLWLIMALSIHDAHAGPHHHKDTTPDPFYFIDQTGVALAVVVTSNTITVNGINASTSISVTGGKYSRNGGAFTAASGKVYNGDTVRVRQTASSSYSTTTNTVLTIGGVKDTFSVTTQAGSADTTPDAFGFTAQTDVALNTAVTSNAATITGIDAPAPVSVSVGSYSINGGAFTSAAGSINNGDSVRVRLTSSAQYSMQTAVTLTIGGVQGAFQVTTLADAGGFLLEPASGGDPNFTSTHFSGSGNCLMCHNNLTDAQGKDVSIETDWSSTMMANSARDPLWRAKVRSELNRNPQLADVISDKCTRCHAPMANFEAKTSGEPMQILDGGVLDASHNRHDSALNGVSCTLCHQIQDSPNLGTLSGFTGKYE…
Methylobacter marinus A45	674036		ARVS01000003_301	8	0	0	0	8	HAO	outside the membrane	>ARVS01000003_301	MKHKTLSLLSLLLFSLIGFSCIGFASTETPDFKQLKKNYYDAHPGKGSHADYWEPIPIQKYWNPKDFYKPPTTIKGEFGRNDCVSCHEAATPGAFHAWKNSVHSDLAAIRNLSDSDVRAYKKEKLAQVEANLVKQGLLEEGQQLDQVGCIDCHGGVGKESINHAENLVMPDRAACGSCHLNEFAEAESERDQEWPQQQWGKGHPSHAVDWEANVENTVWAAMPQREVAQGCDMCHYQQNKCDGCHTRHSFSVAEARQPEACSTCHNGVDHNEFENFMMSKHGTQYQTQGKAKWNFEVPLKDAITKGGYTAPTCQVCHFEYKGEYSHNLVRKVRWAFNPTPAIADNLGHPWFEDRKKAWIDTCSLCHSASFAKAYLDAADKGTIQGLAVEQEAKKVVNKL…
Methylobacter marinus A45	674036		ARVS01000009_136	8	0	0	0	8		outside the membrane	>ARVS01000009_136	MVAVIRNRYLLAVLTVLAITVLTAGWLAYLELPAIPPVLVQPPIQTDASYVGRHACAGCHAEQDRLWRGSHHDLAMQEASDEAVLGDFRDAEFRKDGVVTRFFRQNGRYRVRTDGPDGKPADFQIKYTFGFTPLQQYLVELPGGRLQALSIAWDSRPKEQGGQRWFHLYPNEKIDHKDELHWTKRSQNWNFMCAECHSTNLQKNYDPANRTYNTTASEIDVACEACHGPGSNHVAWAGRKPGYERLDAGTRGLTVLLNERQGVQWTIDPASGNARRGAPRGSEKEIQVCARCHARRAQLSGDYRHGPLMDTHLPSLLQETLYHADGQIEGEVYEYGSFLQSRMYAAGVTCSDCHEPHGLKLRATGNGVCLQCHSKNKYDTEKHHFHRTGSDGANCVDCH…
Methylobacter sp. B4-02	2.05196e+06		JAMJFP010000028_29	7	0	0	0	7		membrane bind	>JAMJFP010000028_29	MAAAIRNRSLLAVLIVLAITVLMAVWLAYIELPAIPPVLAQPLIQTDASYVGRHACAGCHAEQDRLWQGSHHDLARQEASDETVLGDFRDAEFKKDGVVSRFFRQGGHYMVHTDGPDGKLADFKIRYTFGFTPLQQYLVELPGGRLQALSIAWDSRSKEQGGQRWFLLYPNEKIDHTDELHWTKRSQNWNFMCAECHSTNLQKNYDPASLTYNTTTSEIDVTCEACHGPGSHHMIWAERKRGFERIDAGTRGLTVLLNERQGVQWSINPVTSNAHRSTARGSEQEIQVCARCHARRAQLTGDYRYGPVMDSHLPSLLQETLYHADGQIEGEVYEYGSFLQSRMYAAGVTCSDCHEPHSLKLRAPGNGVCLQCHGQDKYDTEKHHFHRIGSDGARCVDCH…
Methylobacter sp. B4-02	2.05196e+06		JAMJFP010000065_19	8	0	0	0	8	HAO	membrane bind	>JAMJFP010000065_19	MKHKTLSLLSLLLFSLIGFSCIGFASTETPDFKQLKKNYYDAHPGKGSHADYWEPIPIQKYWNPKDFYKPPTTIKGEFGRNDCVSCHEAATPGAFHAWKNSVHSDLAAIRNLSDSDVRAYKKEKLTQVEANLVKQGLLEEGQQLDQVGCIDCHGGVGKETINHAENLVMPDRAACGSCHLNEFAEAESERDQEWPQQQWGKGHPSHAVDWEANVENTVWAAMPQREVAQGCDMCHYQQNKCDGCHTRHSFSVAEARQPEACSTCHNGVDHNEFENFMMSKHGTQYQTQGKAKWNFEVPLKDAITKGGYTAPTCQVCHFEYKGEYSHNLVRKVRWAFNPTPAIADNLGHPWFEDRKKAWIDTCSLCHSASFAKAYLDAADKGTIQGLAVEQEAKKVVNKL…
Methylobacter sp. BBA5.1	1.49506e+06		JQKS01000012_53	7	0	0	1	8		outside the membrane	>JQKS01000012_53	MKQFLLWSIVFISLGVGGWFILPQEDMLKQAVTWQRLAMPGELSRAHSFLDRDCAACHTPVQGIEDSTCISCHANNEFLLQRQPTVFHASIGSCASCHLEHAGRQNRDTVMDHKTLAAIGIKTLQRHENEDADDQNTVNEILYWMKTHTAQGEISSSELLLQCSSCHANEDPHQSLFGKECTDCHVTSHWTVSAFRHPSPNSTNCAQCHQAPPSHYMKHFKMISATVAGKPHAKMNECFECHQTTSWNDIRSVGWYKHH*
Methylobacter sp. BBA5.1	1.49506e+06		JQKS01000015_10	8	0	0	0	8	HAO	outside the membrane	>JQKS01000015_10	MKHKTLSLLSLLLFSLIGFSCIGFASTETPDFKQLKKNYYDAHPGKGSHADYWEPIPIQKYWNPKDFYKPPTTIKGEFGRNDCVSCHEAATPGAFHAWKNSVHSDLAAIRNLSDSDVRAYKKEKLVQVEANLVKLGLLEKGQQLDQVGCIDCHGGVGKETINHAENLVMPDRATCGSCHLNEFAEAESERDQEWPQNQWGKGHPSHAVDWEANVENTVWAAMPQREVAQGCDMCHYQQNKCDGCHTRHSFSVAEARQPEACSTCHNGADHNEFENFMMSKHGTQYQTQGKAKWNFEVPLKDAITKGGYTAPTCQVCHFEYKGEYSHNLVRKVRWAFNPTPAIADNLGHPWFEDRKKAWIDTCSLCHSASFAKAYLDAADKGTIQALDVEQEAKKVVTKL…
Methylobacter sp. BBA5.1	1.49506e+06		JQKS01000015_28	8	0	0	0	8		outside the membrane	>JQKS01000015_28	MAAVIRNRYLLAVLIVLAITVLTAGWLAYLELPAIPPVLVQPPIQTDASYVGRHACAGCHAEQDRLWRGSHHDLAMQEASDETALGNFRDAEFRKDGVVTRFFRQGGHYMVHTDGPDGKPADFEIKYTFGFTPLQQYLVELPGGRLQALSIAWDSRPKEQGGQRWFHLYPNEKIDHTDELHWTKRSQNWNFMCAECHSINLQKNYDPASRTYRTTASEIDVACEACHGPGSNHVAWAERKPGYERIDAGTRGLTVLLNDRQGVQWTIDPASGNARRGAPRGSEKEIQVCARCHARRAQLSGDYRHGPLMDTHLPSLLQETLYHADGQIEGEVYEYGSFLQSRMYAAGVTCSDCHEPHGLKLRATGNGVCLQCHNKNKYDTEKHHFHRTGSDGAQCVDCH…
Methylobacter sp. KRF1	2.49775e+06		RYFG01000003_97	10	0	0	0	10		outside the membrane	>RYFG01000003_97	MNVEFLVKRMKLVYLSLVAGMVLIISCSPLSPLSLKPELNSAQSRAQYVGESVCSSCHELETNHWSHTIHARIPNLAAPDNARAQGCETCHGPGSEHLADTANKSKIMVFTHQSGSTISQQNSMCLQCHKGKERIAWPGSVHQINDLSCSDCHNPMAQFSEKGLLRKDGVNQTCYSCHQQQRAEFRKRSHMPLPEGKITCTDCHNPHGSSTAPLLKADTVNQVCYQCHQEKRGPFIWEHAPVRESCLNCHQPHGSNHESLLVSARPFLCQSCHTNRGHPNDLMTTSNLAAASNPDARLMNRSCQNCHAQIHGSNQPSGPLFHR*
Methylobacter sp. SO_2017_GW1 bin 29	2.05196e+06		JALNYY010000001_102	7	0	0	1	8		membrane bind	>JALNYY010000001_102	MKQLVLWLVLIVAVATTASLTVVHFKRASSTLQQFVSPGPLSARHAYLGDRCASCHEPTVGVTVVKCTACHANAERLLGRQPTAFHASIQECAACHVEHQSTNSRLIAMDHVELAKVGARTLARASRTDAASAATIESLETWLRIRIPDQLDEGSAREALNCTGCHSTKDRHLGLFGKDCAQCHIMAQWTIAEFQHPSPRSTNCAQCHQAPPSHYMMHFDMISKKIAGQEDAQVAGCCGPAQVNQCYRCHQTTSWNDIRGVGYYKHH*
[truncated: 79 more rows]

## Sheet: Table S9
genome id	Genome Name	pmoCAB	pxmABC	soluble methane monooxygenase (mmoXYBZDC)	Lanthanide-Dependent Methanol Dehydrogenases (xoxF)	Methanol dehydrogenase (mxaF)
2.05196e+06	Methylobacter sp. strain DP16D_bin.19	1	0	1	1	1
2.05196e+06	Methylobacter sp. LH_M5	1	0	0	1	1
2.05196e+06	Methylobacter sp. SO_2017_LW4 bin 67	1	0	0	1	1
[truncated: 63 more rows]
